# Supplementary material for: Fitting Contralateral Neuroanatomical Asymmetry into the Amyloid Cascade Hypothesis
Source: MDPI journal article supplement (doi:10.3390/healthcare10091643), 2022-08-29

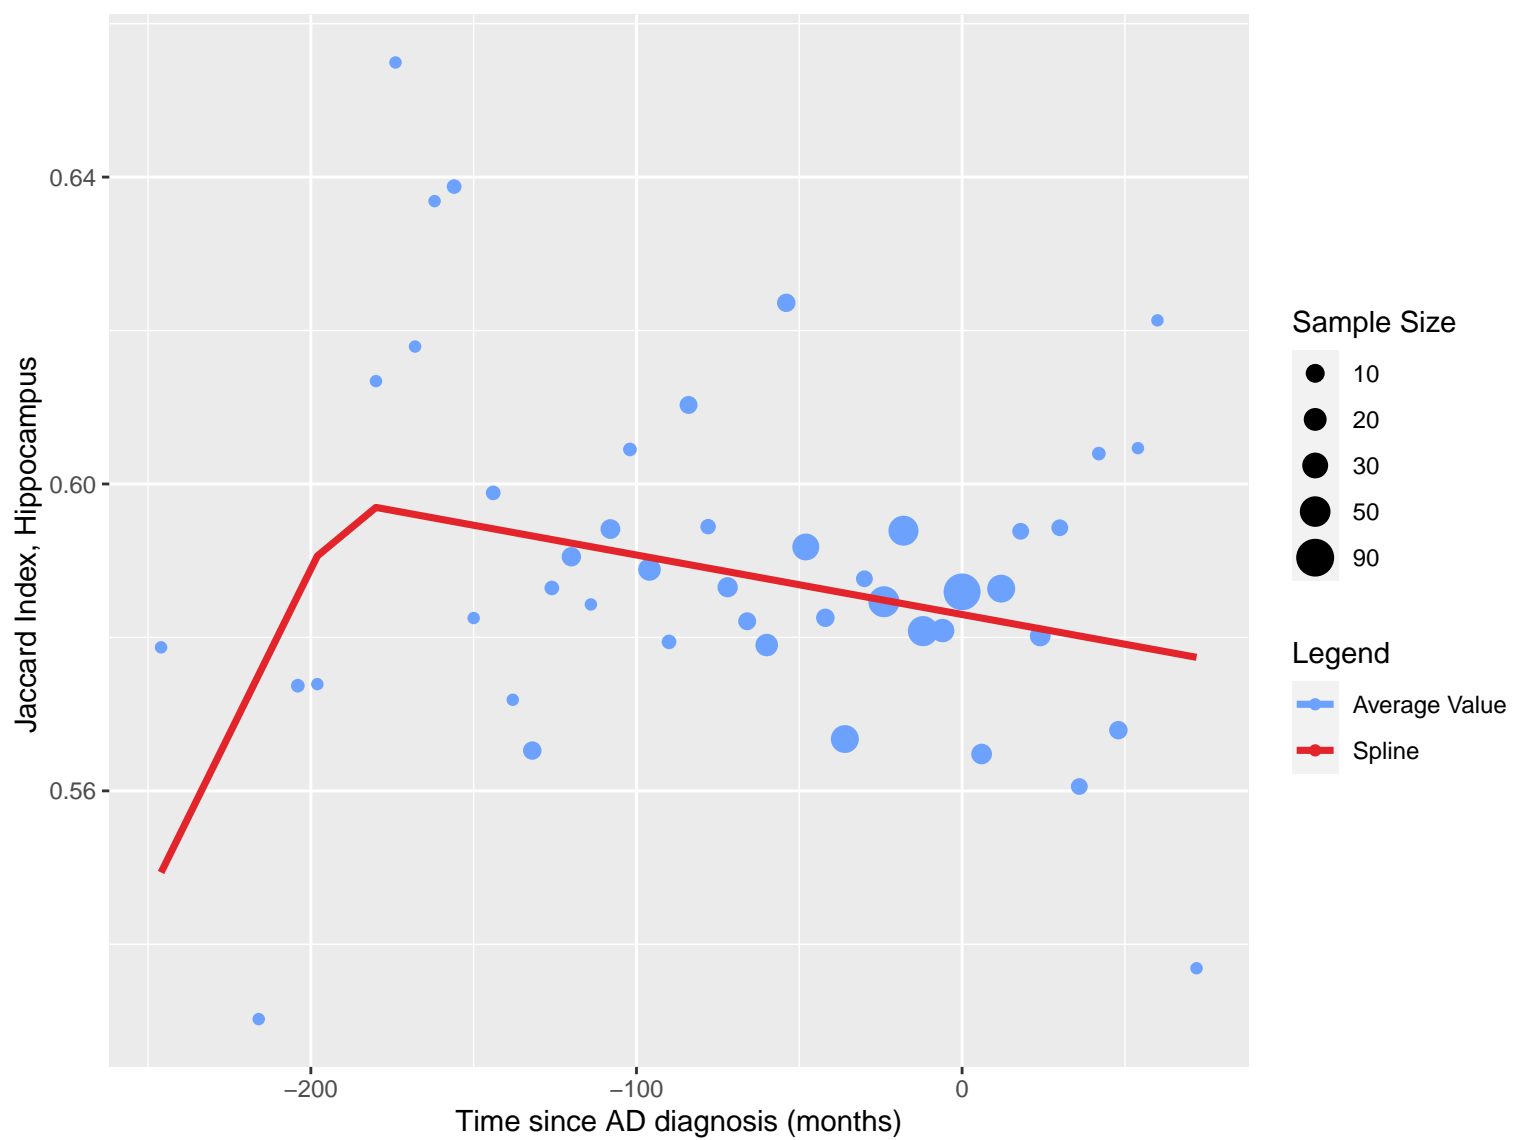

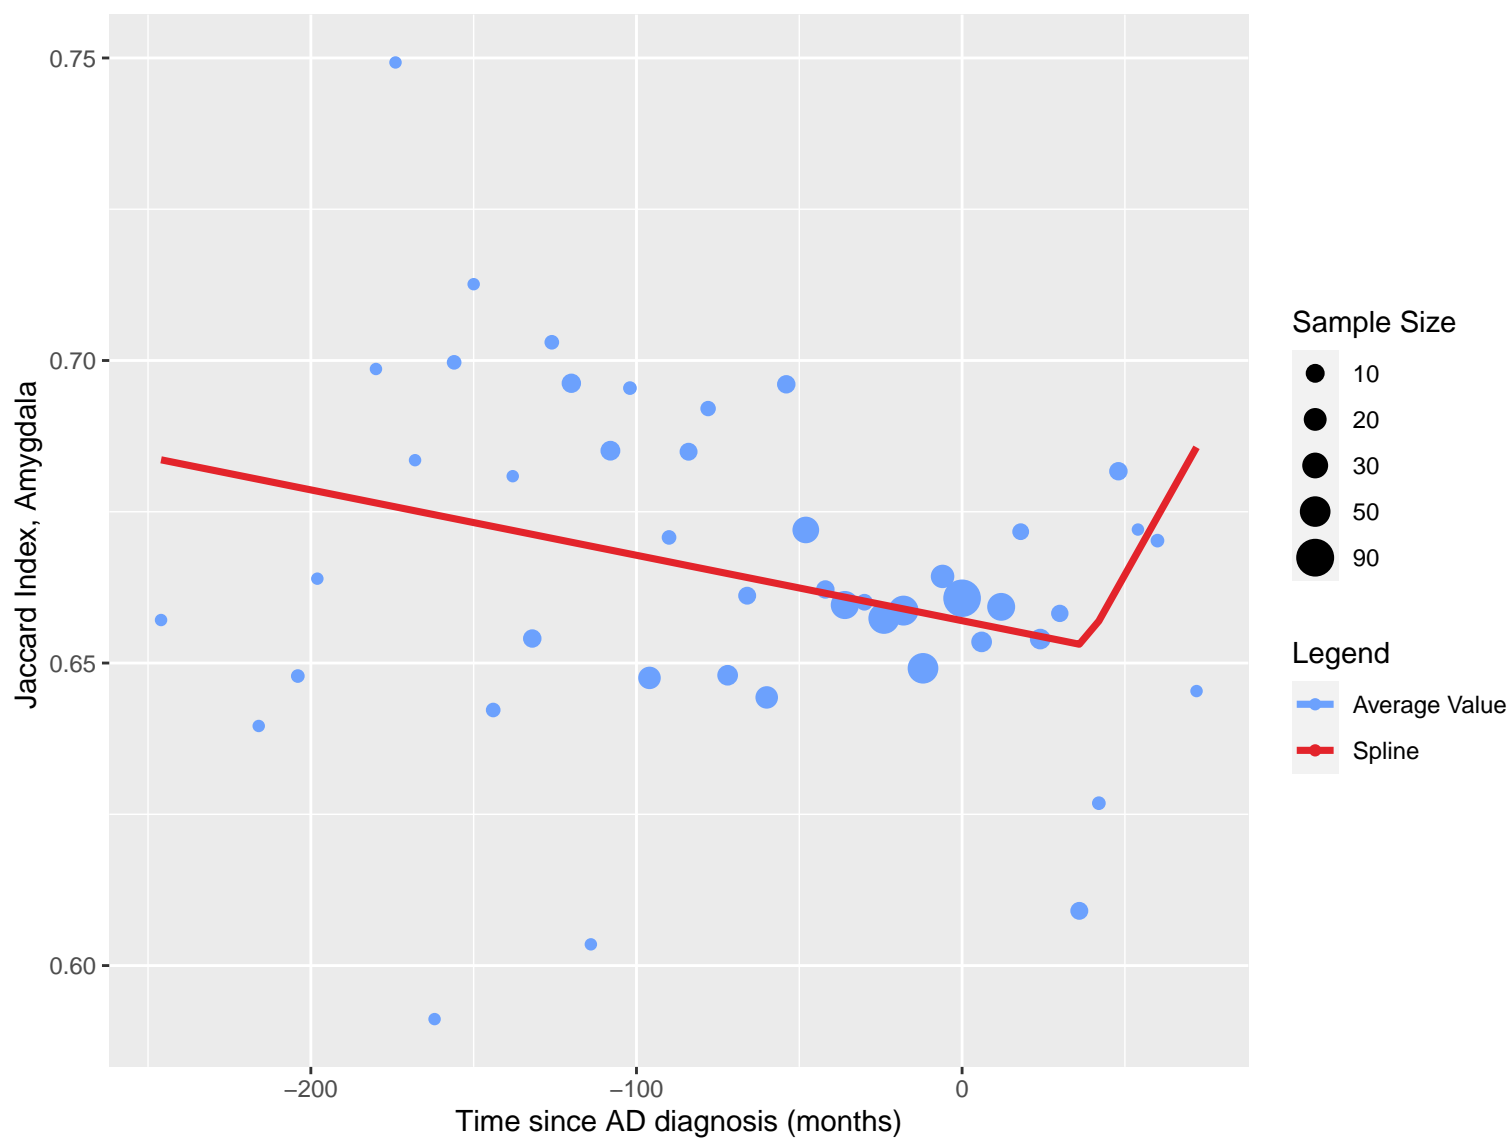

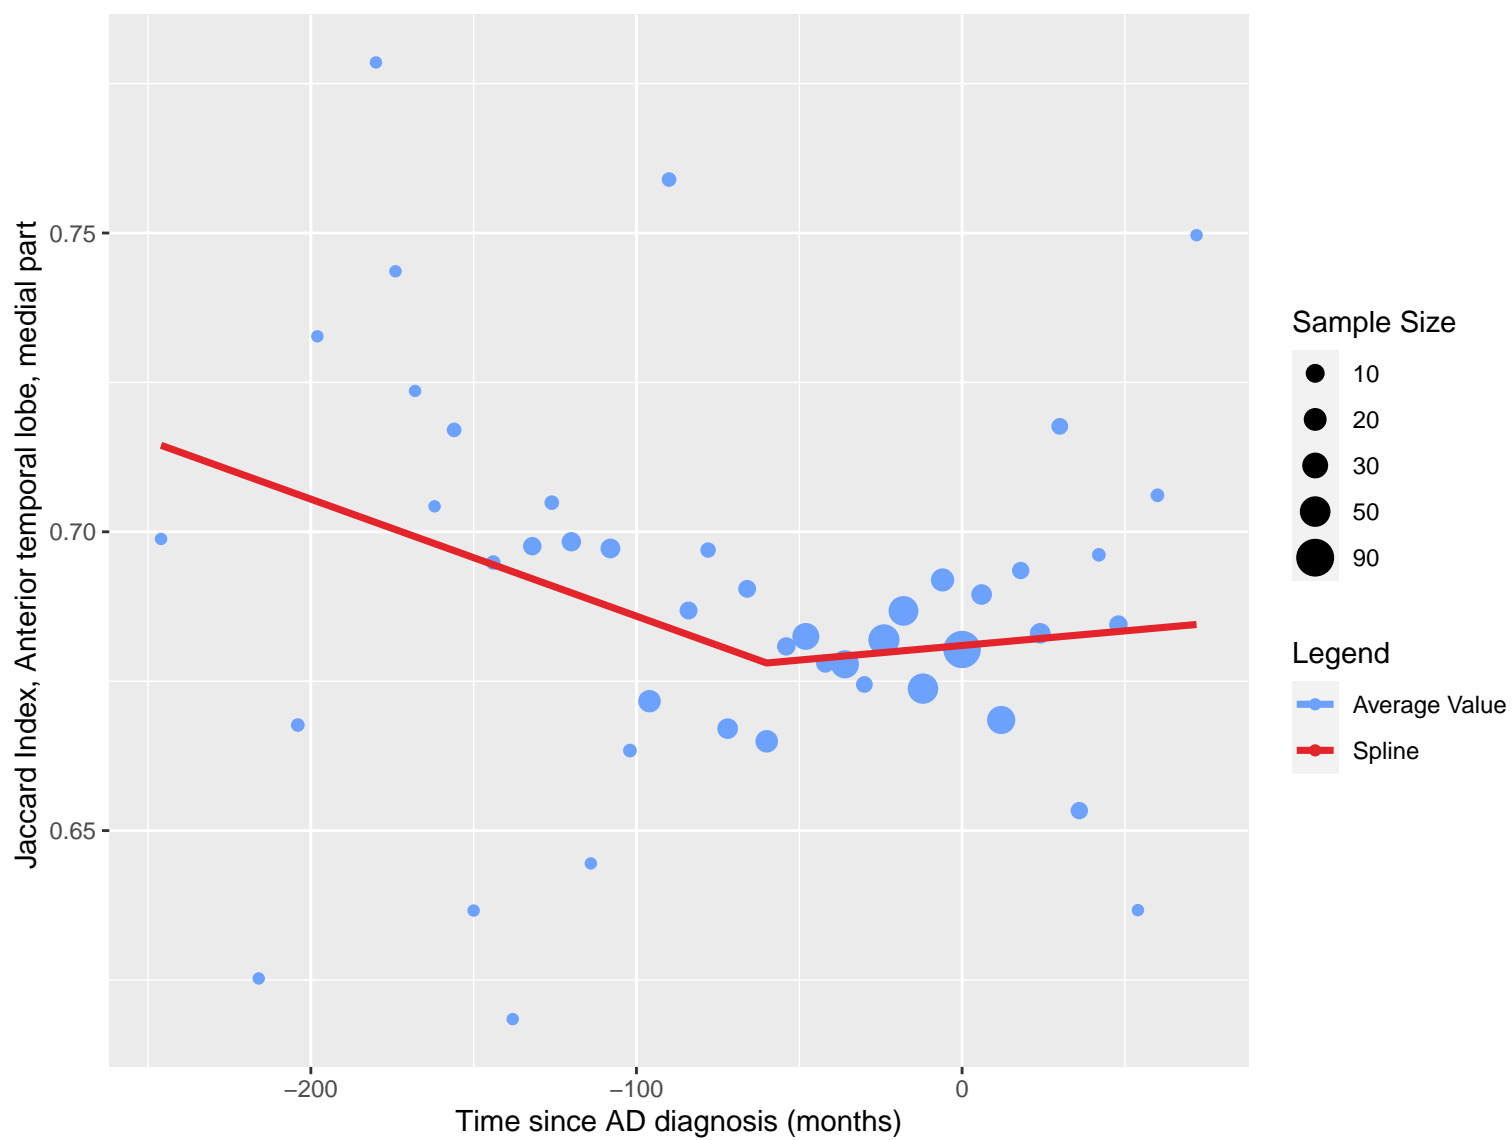

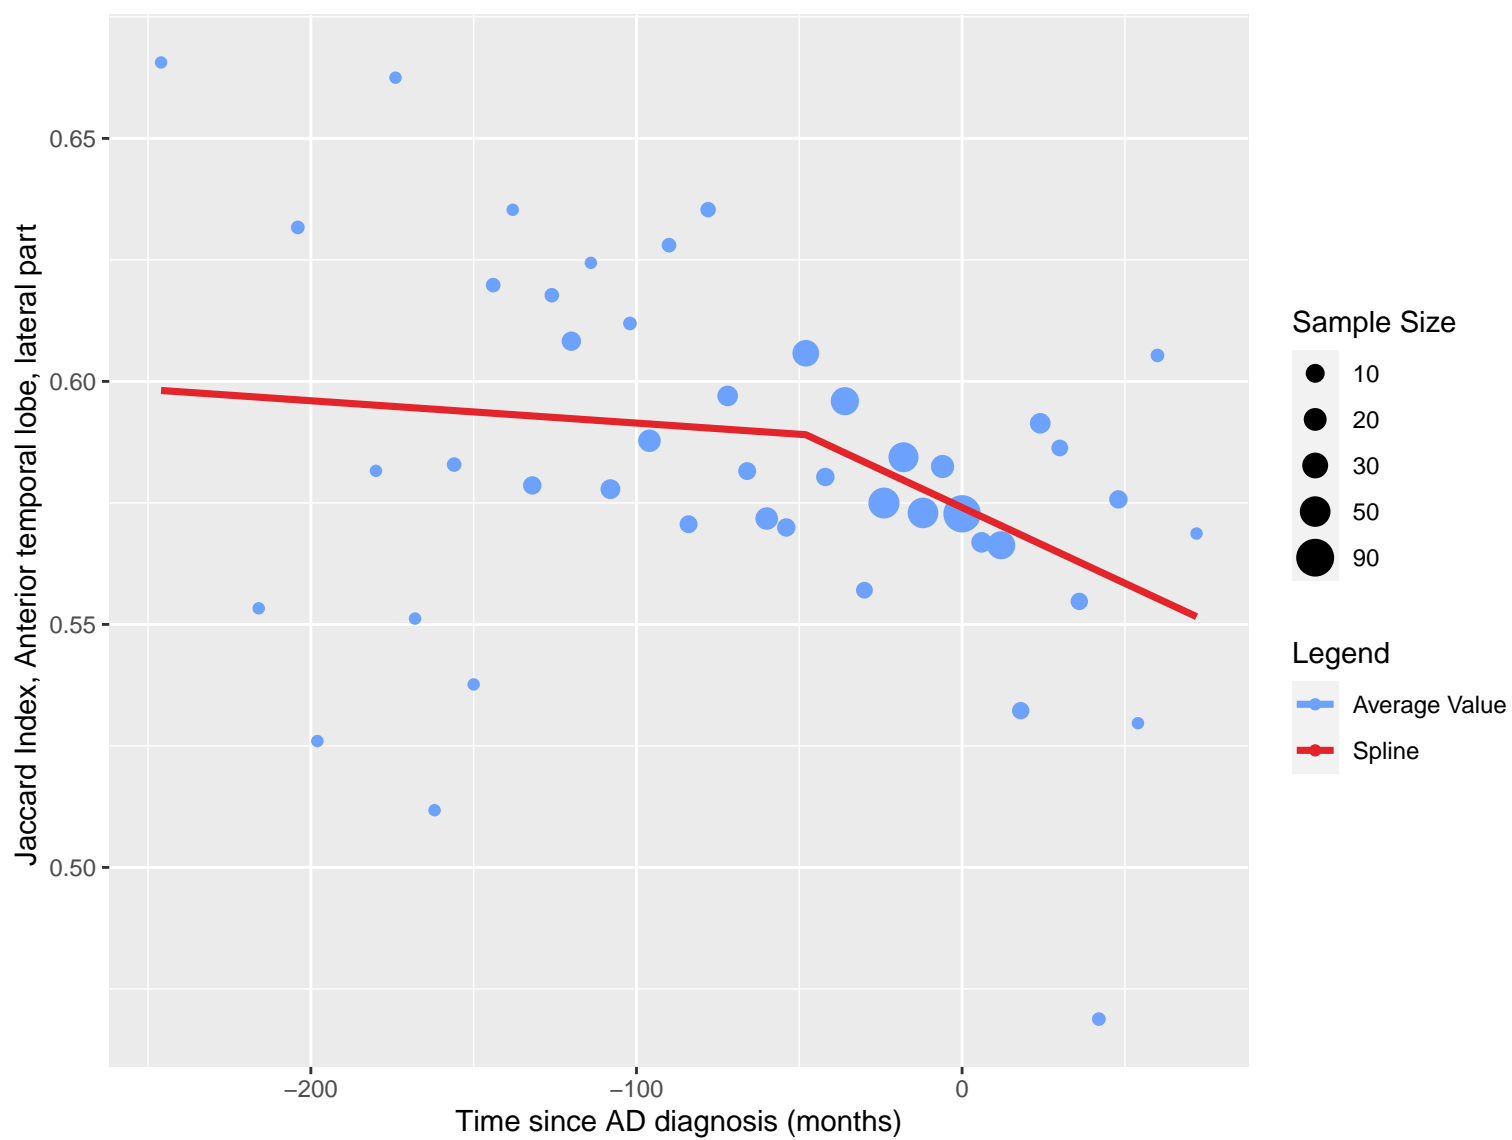

Jaccard Index, Gyri parahippocampalis et ambiens

Time since AD diagnosis (months)

Sample Size

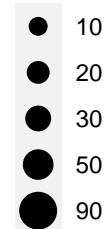

Legend

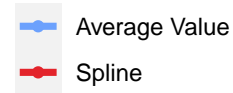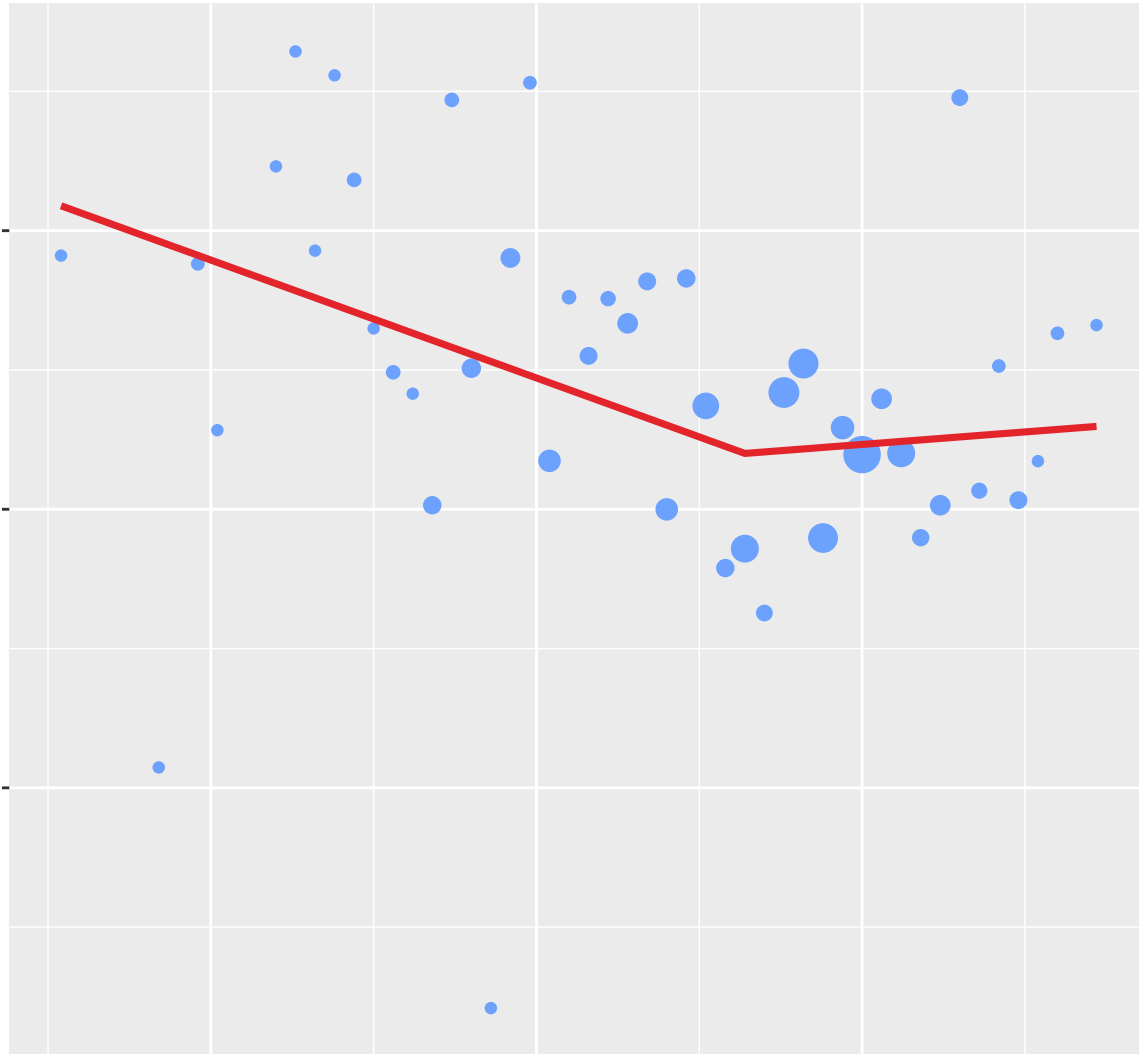

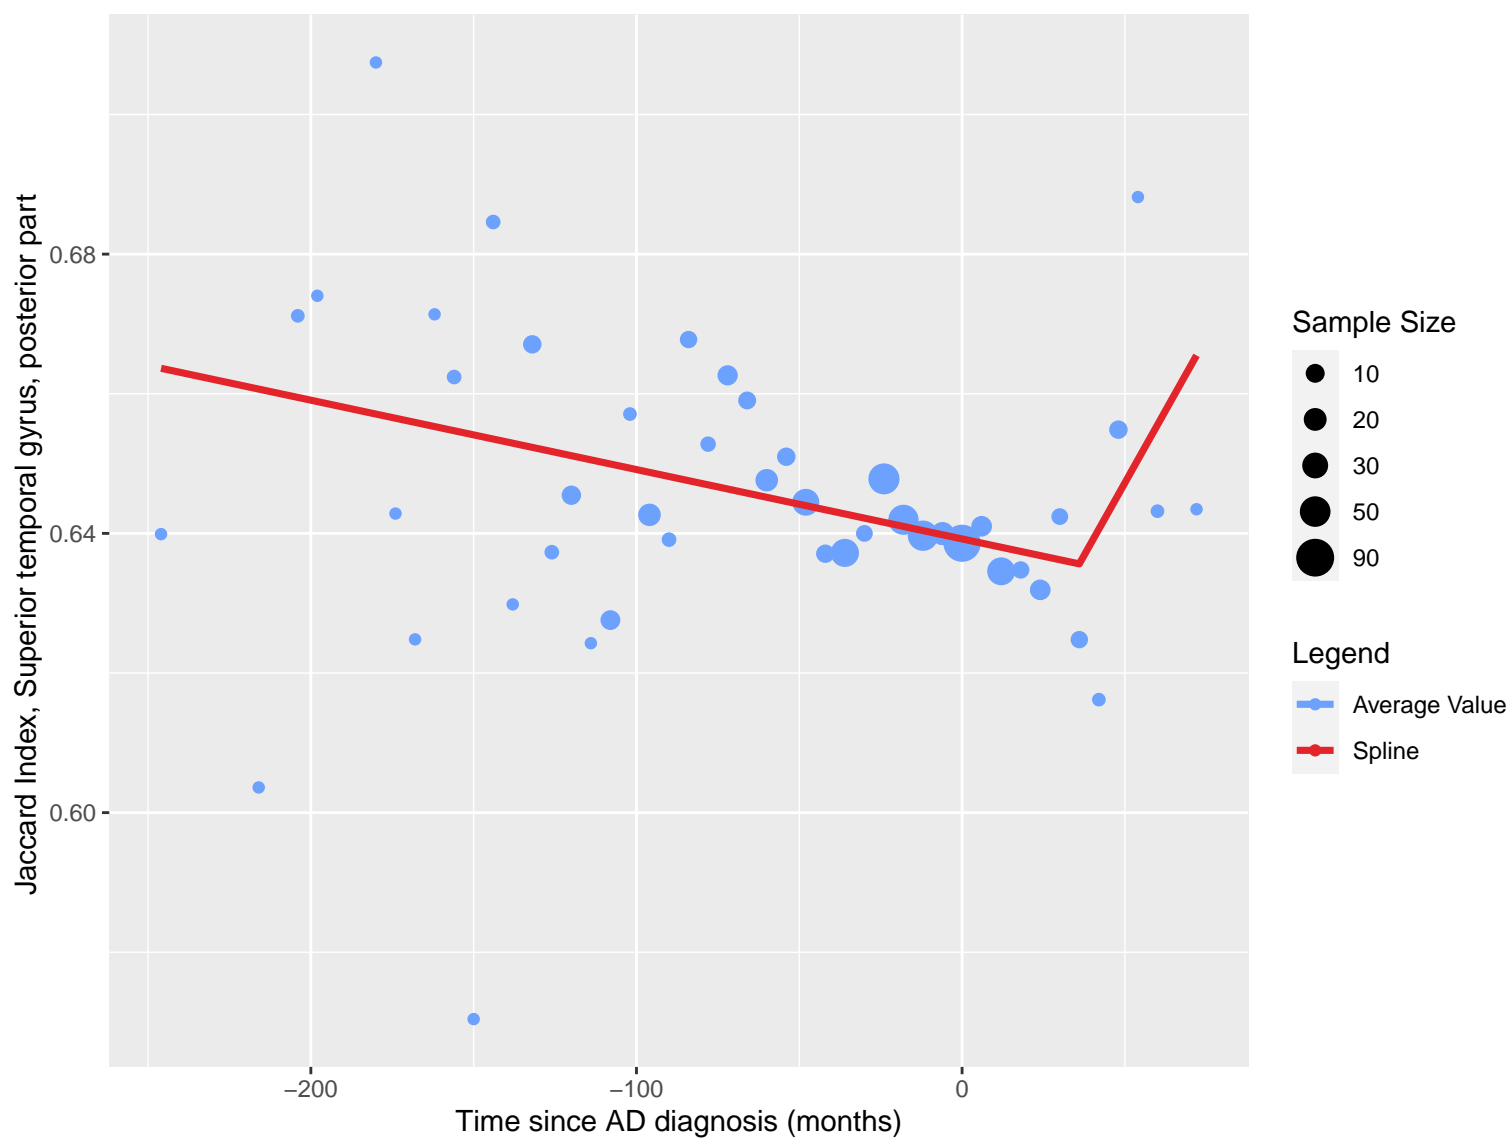

Jaccard Index, Lateral occipitotemporal gyrus, gyrus fusiformis

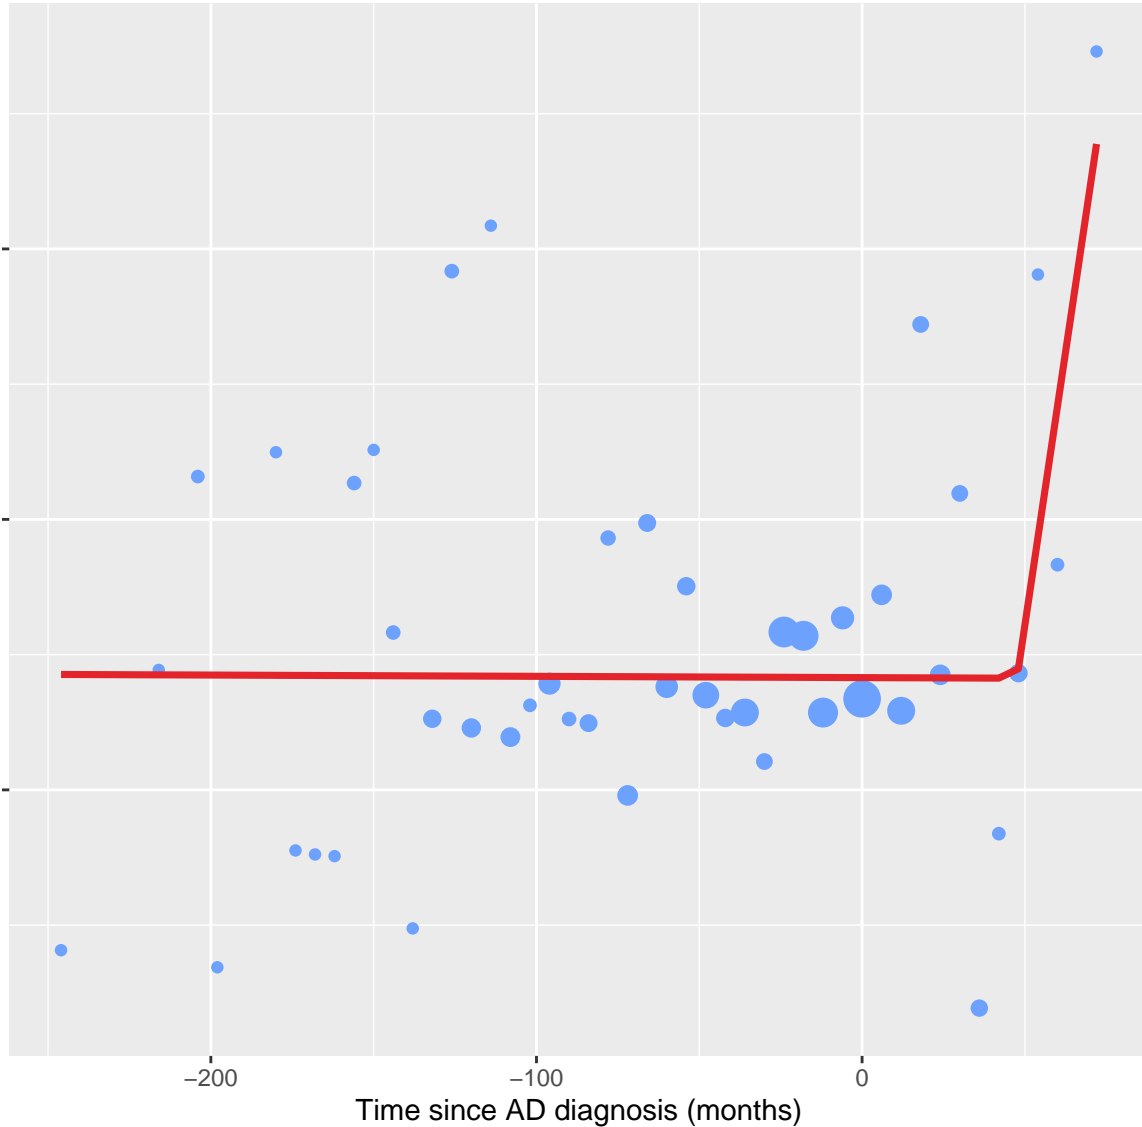

Sample Size

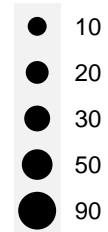

Legend

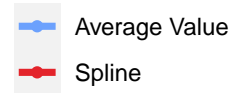

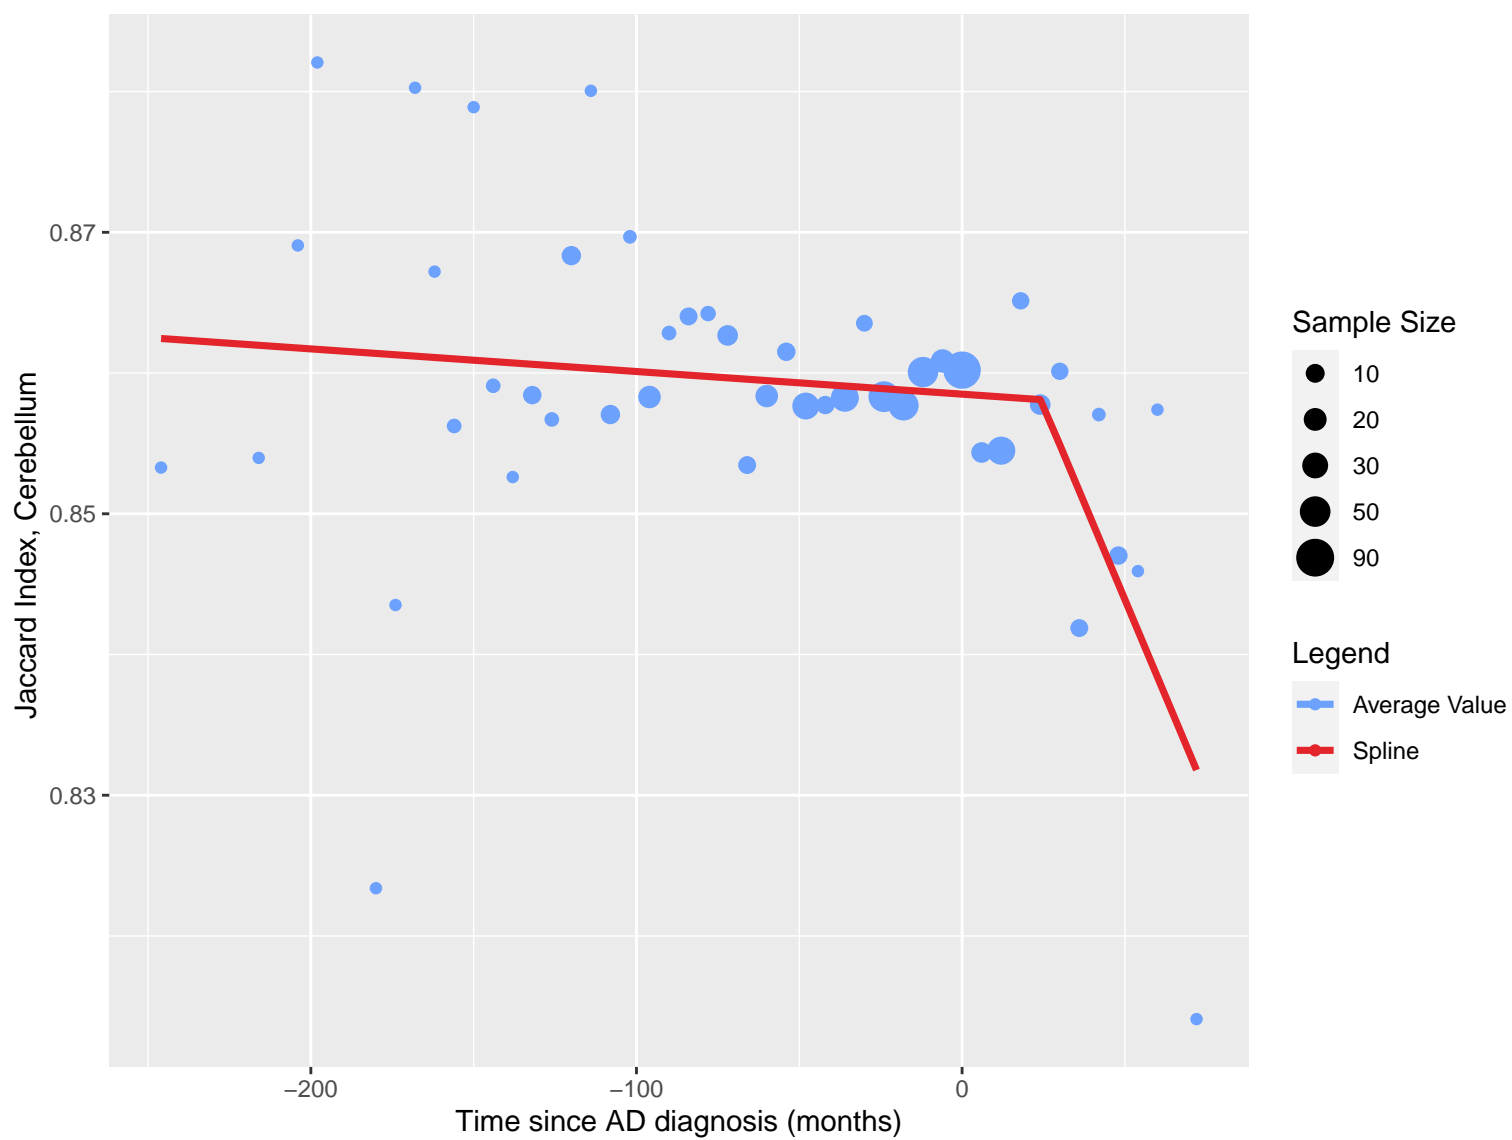



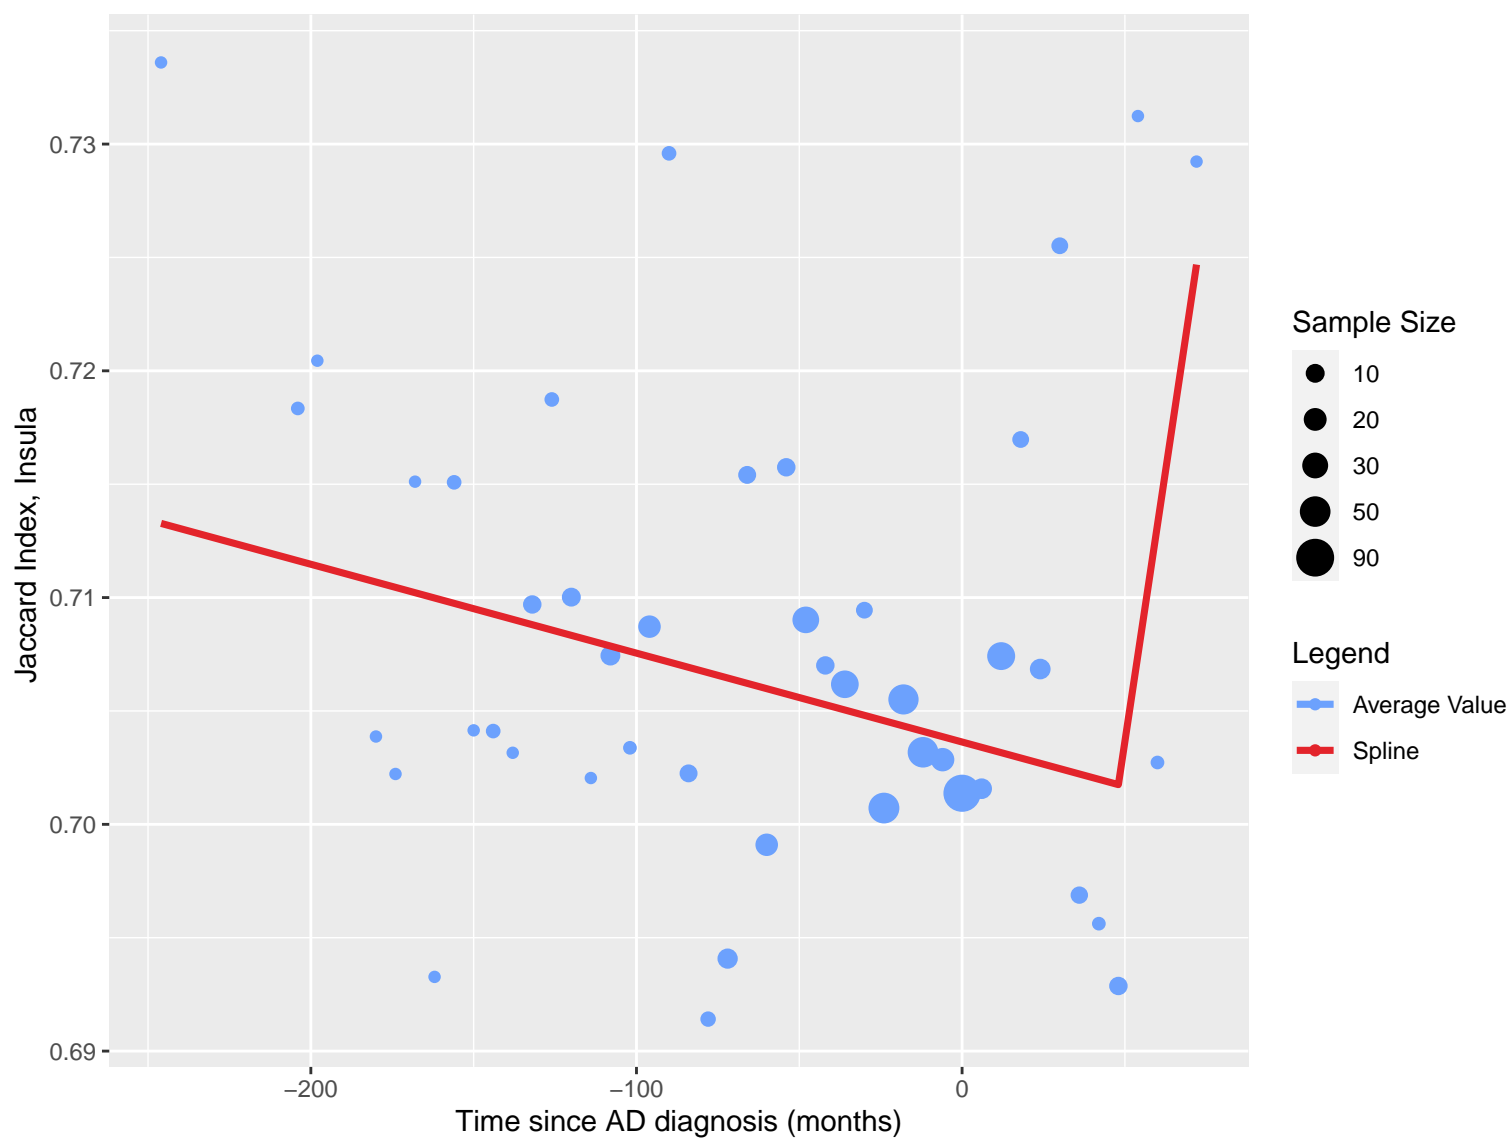

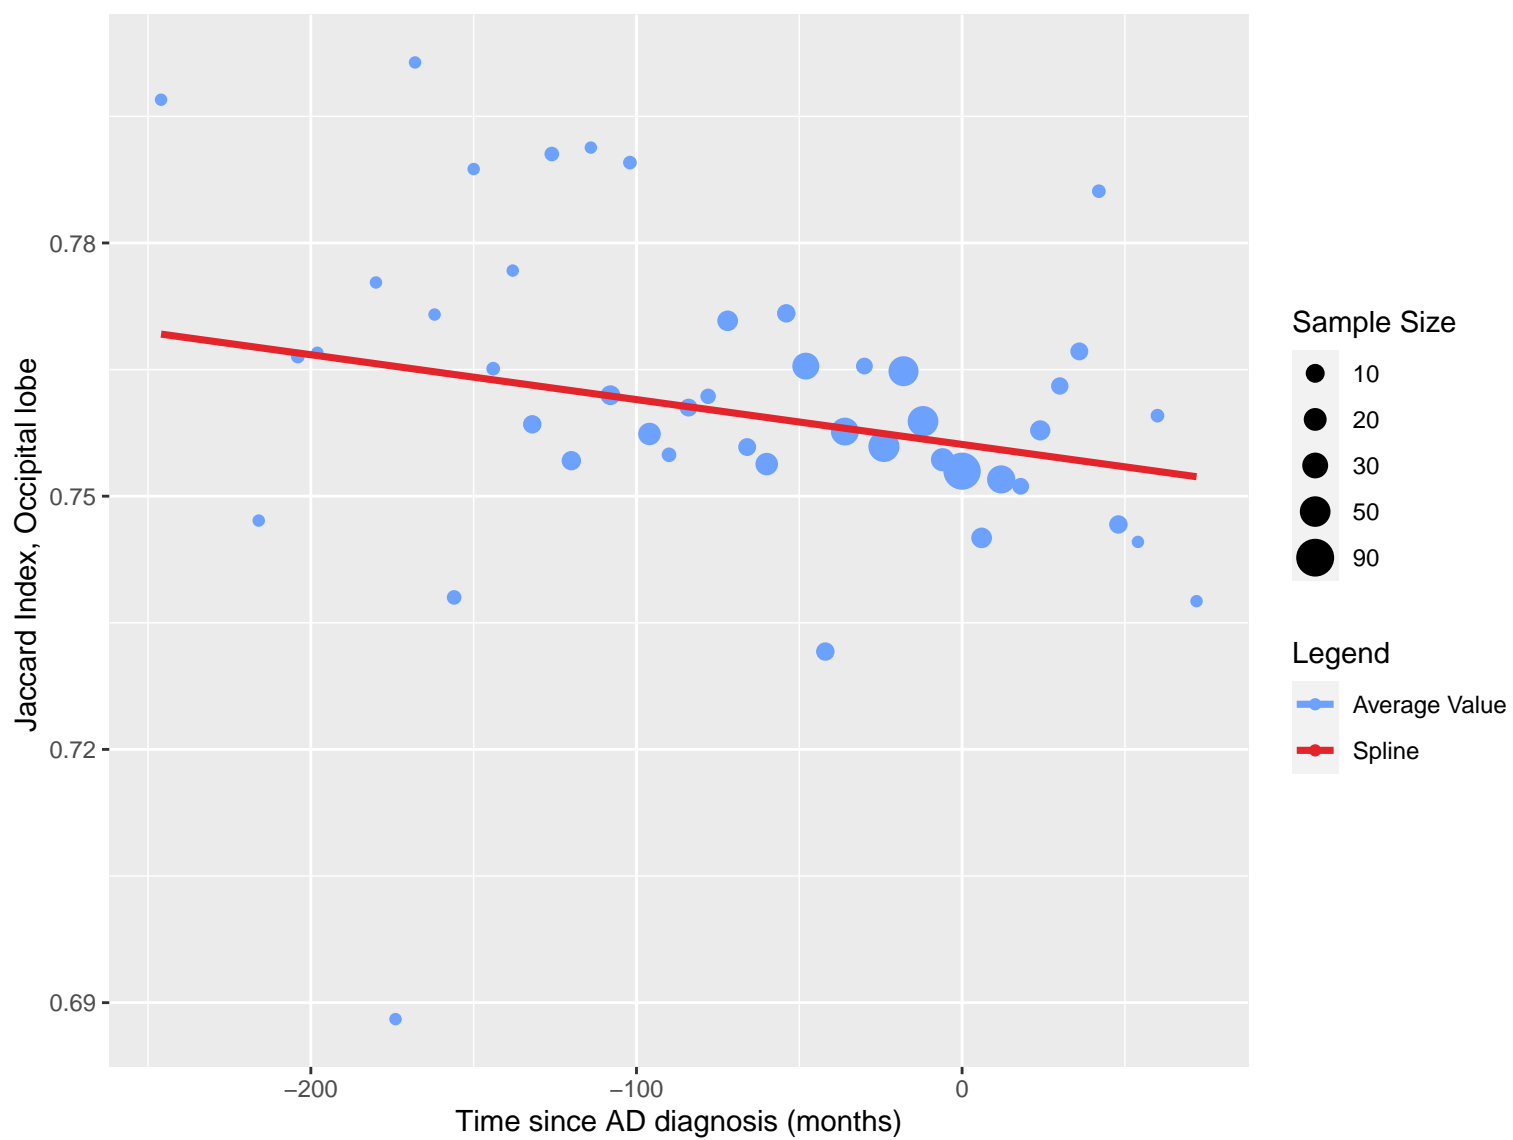

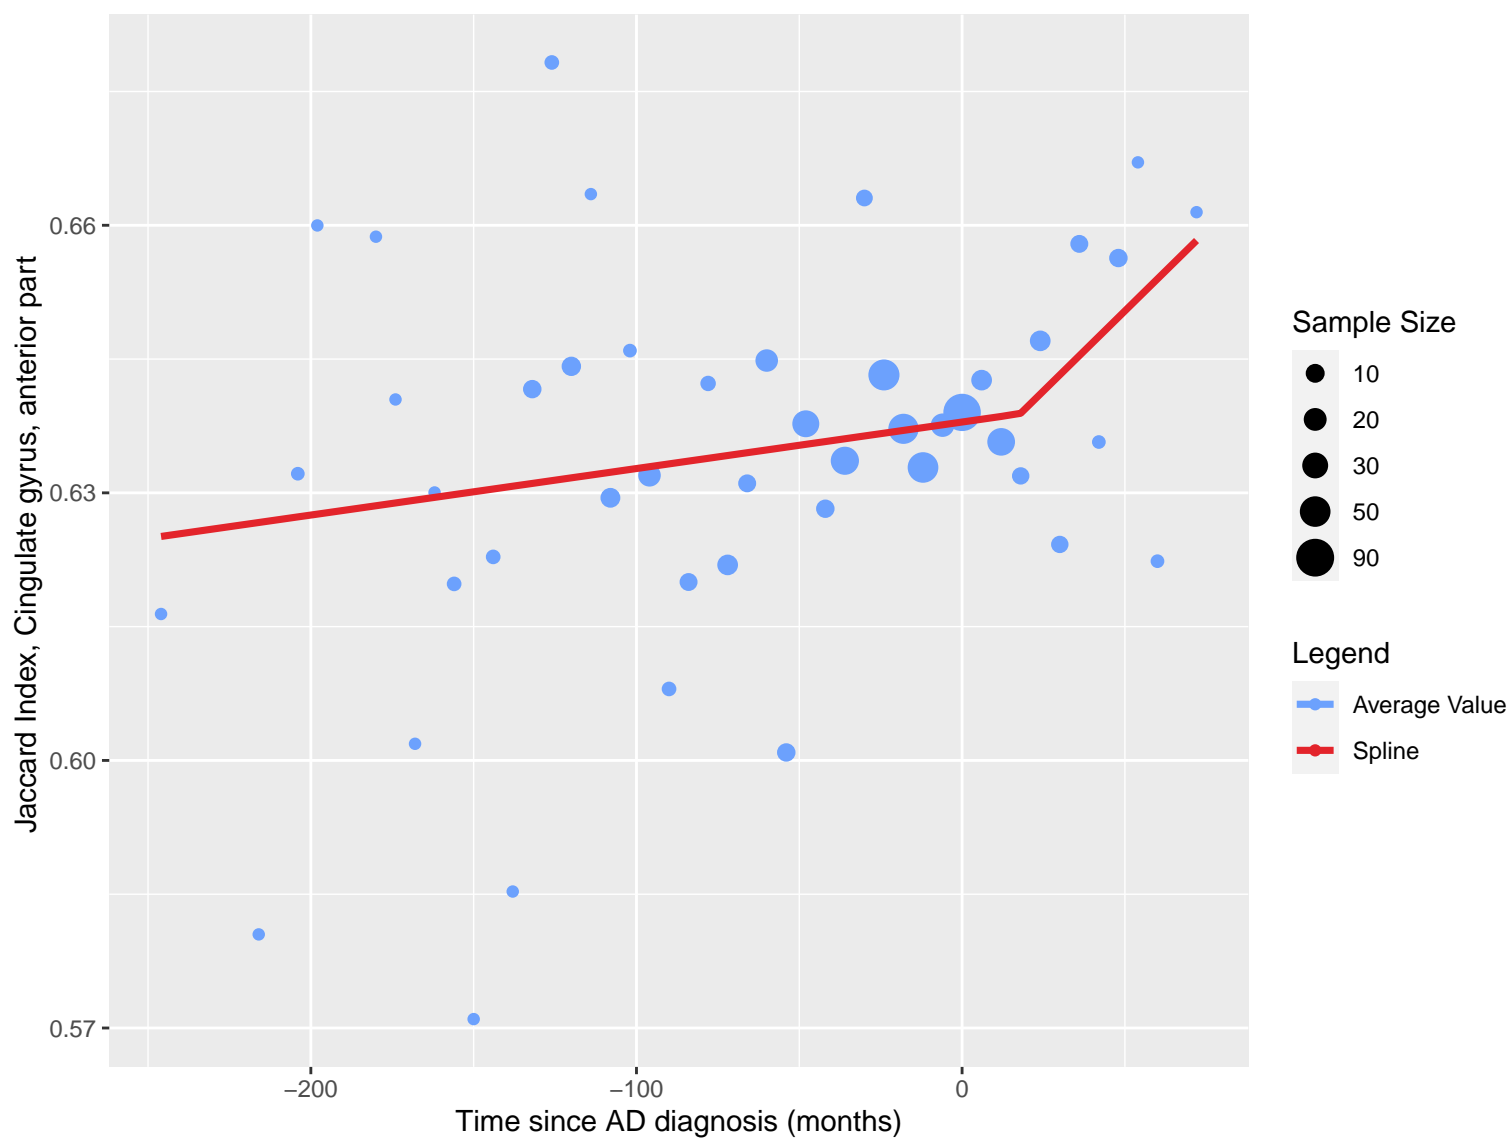

Jaccard Index, Cingulate gyrus, posterior part

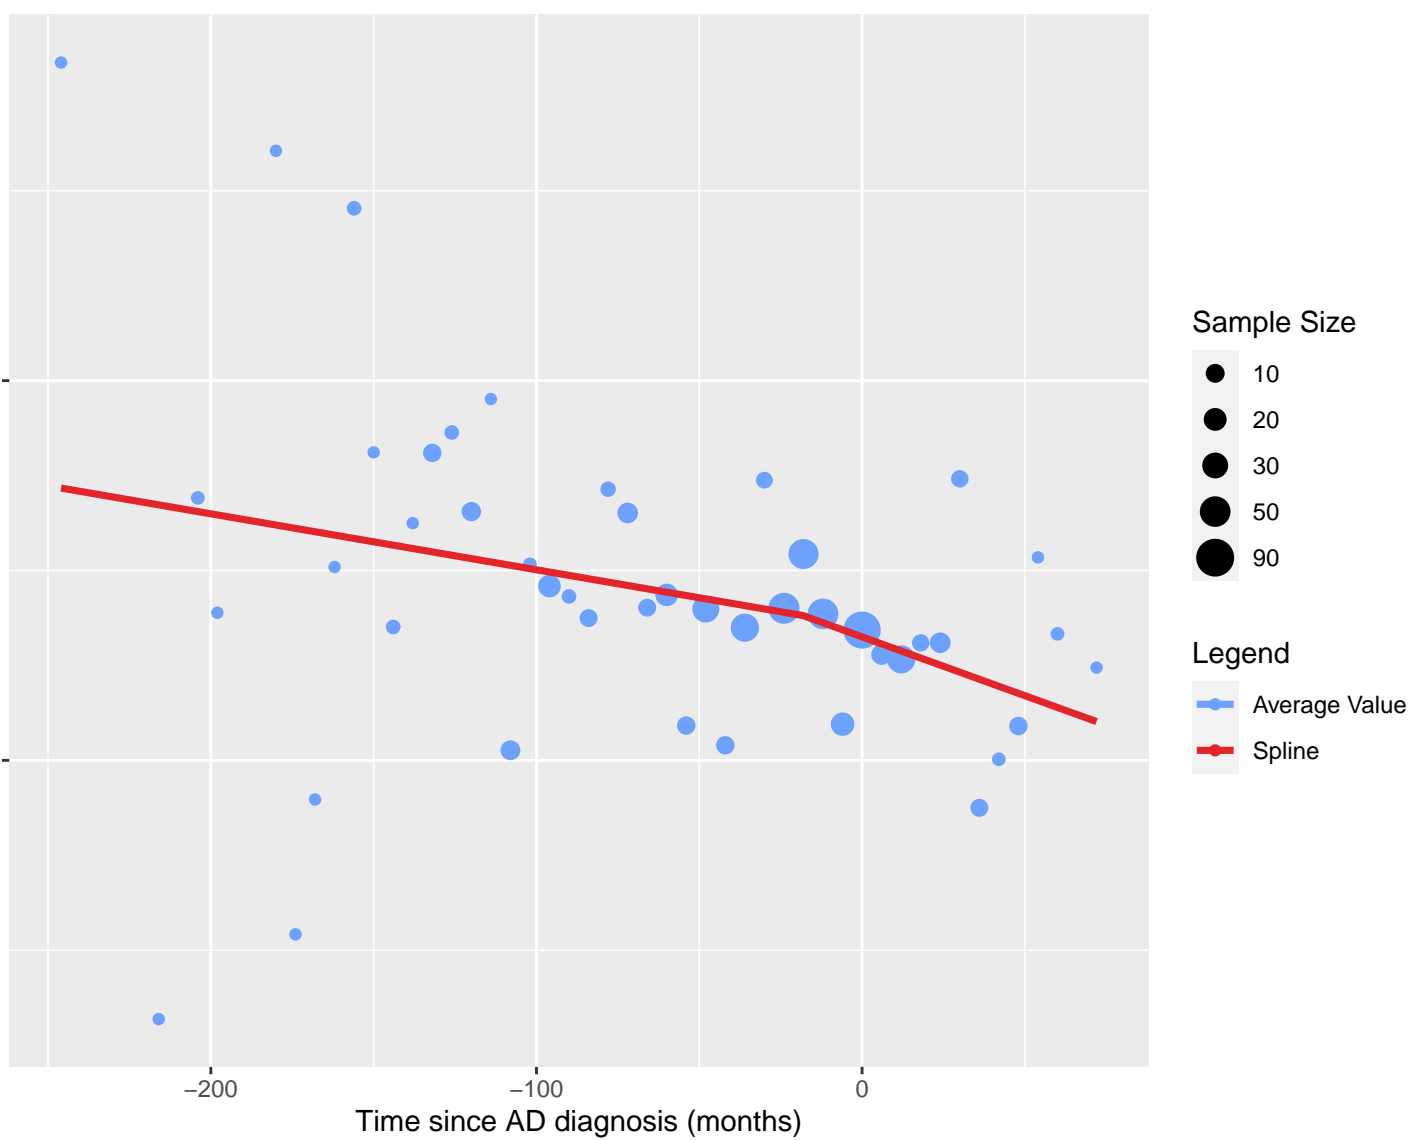

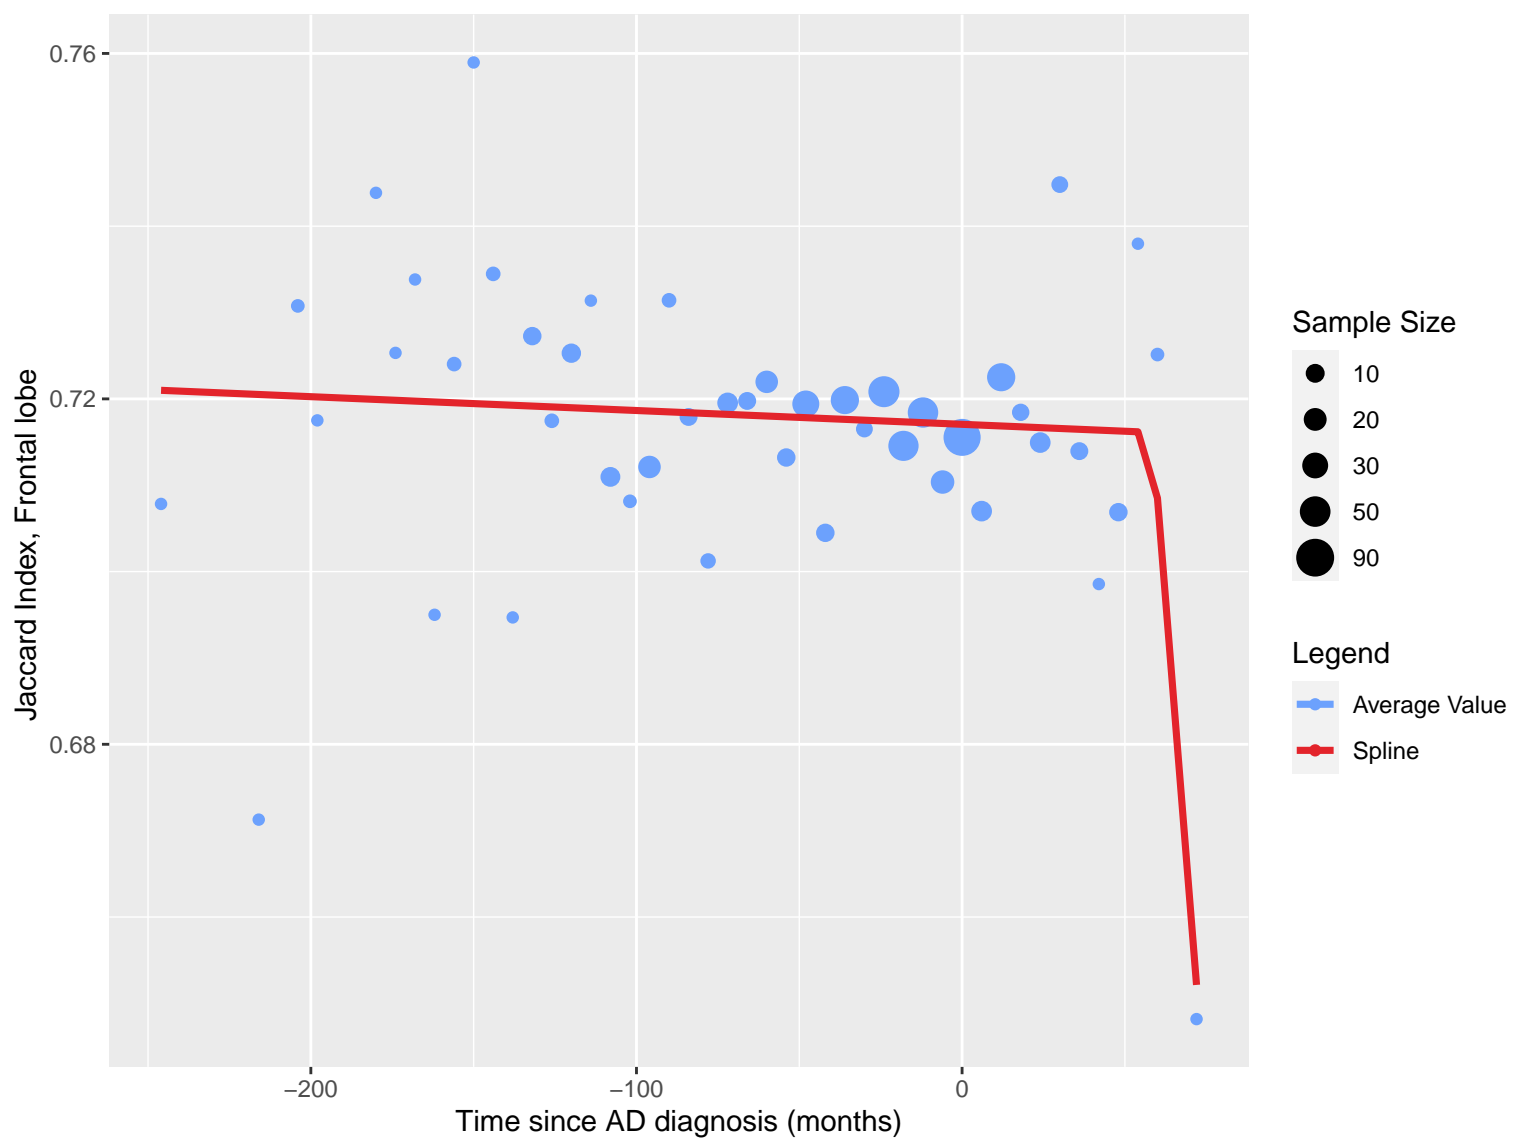

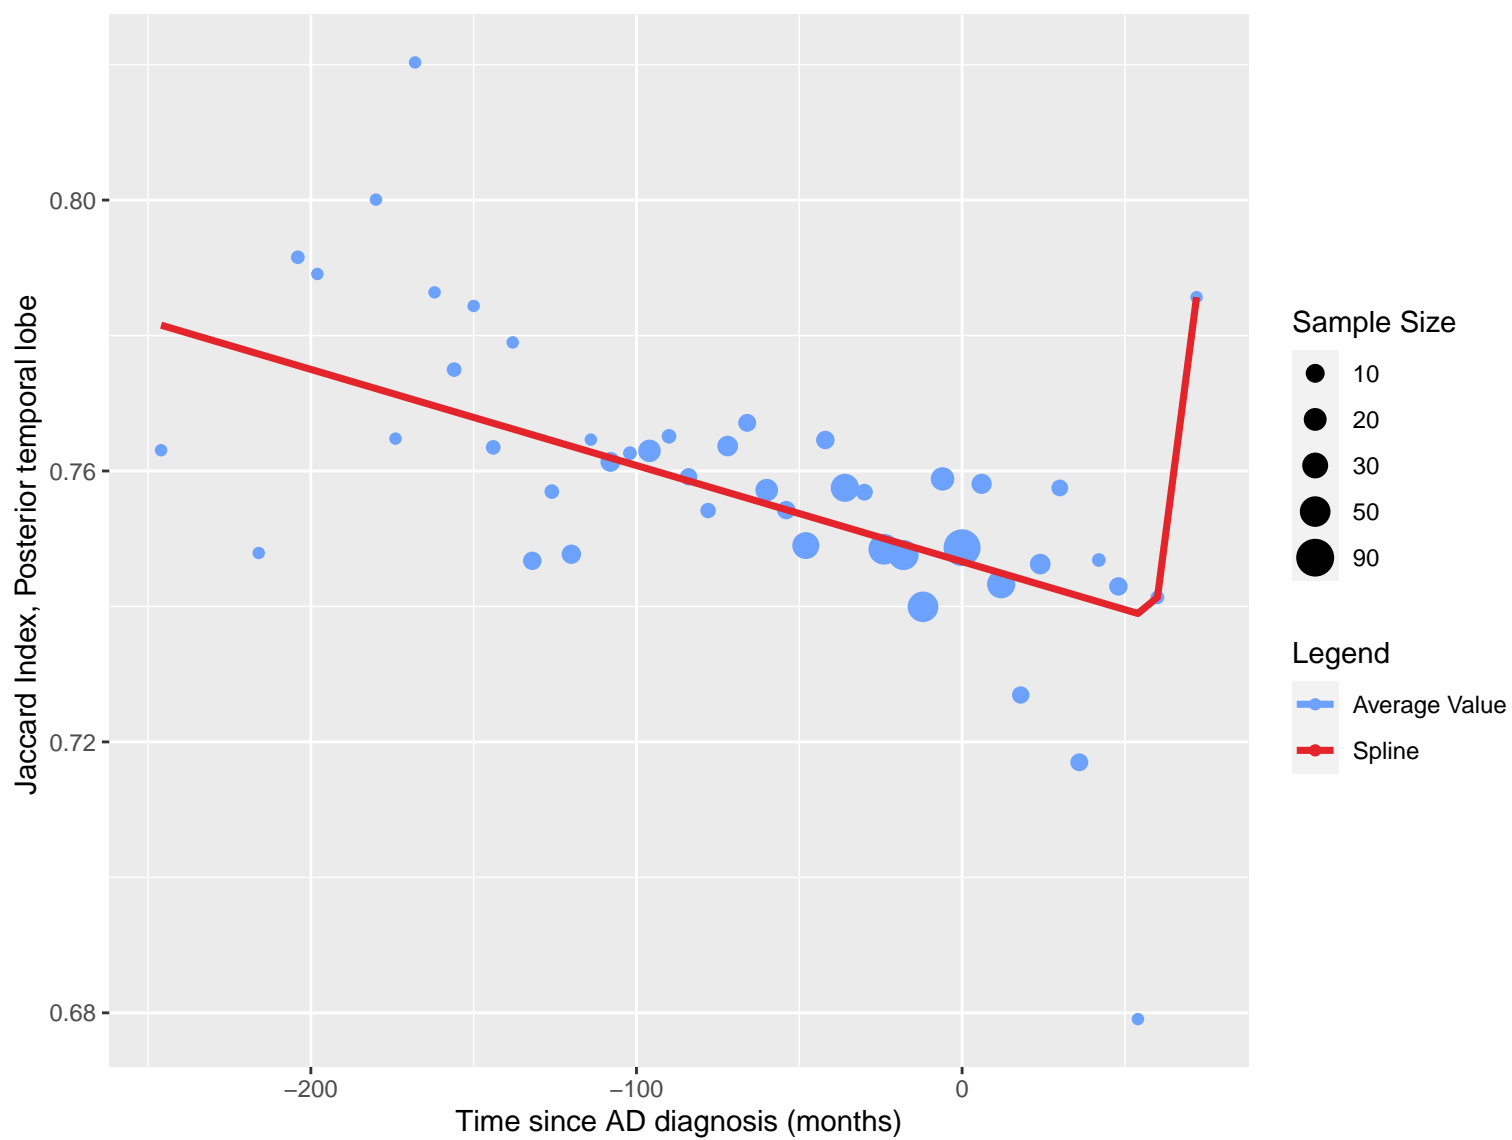

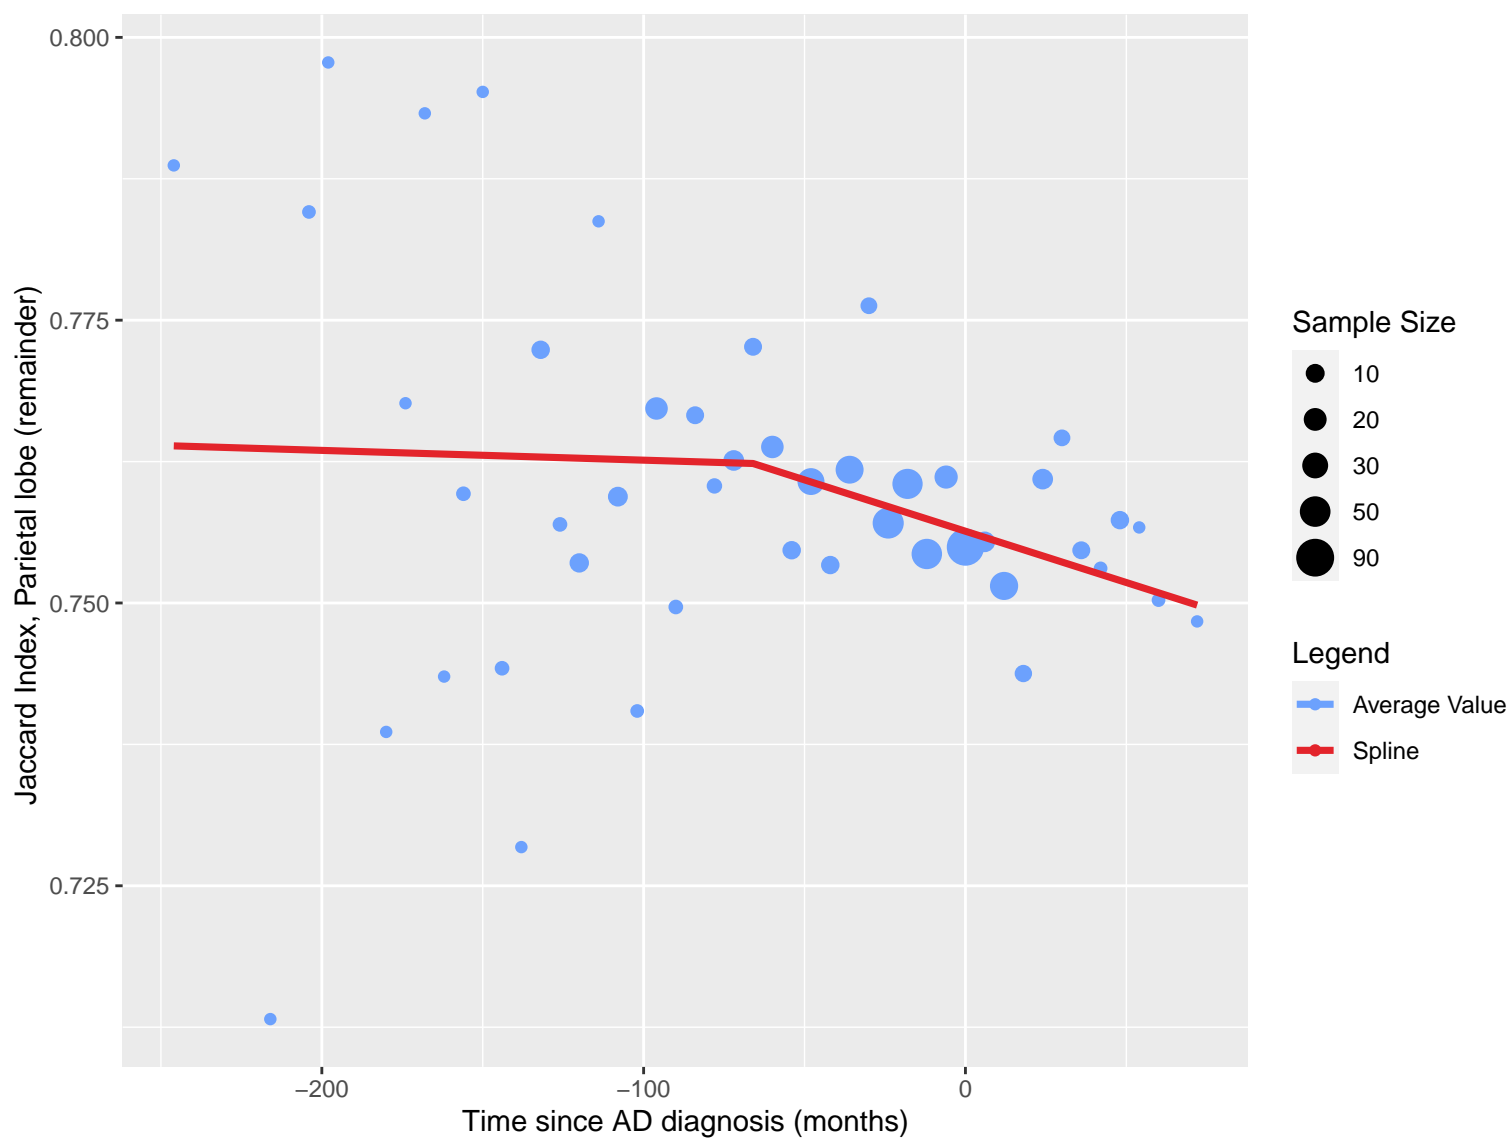

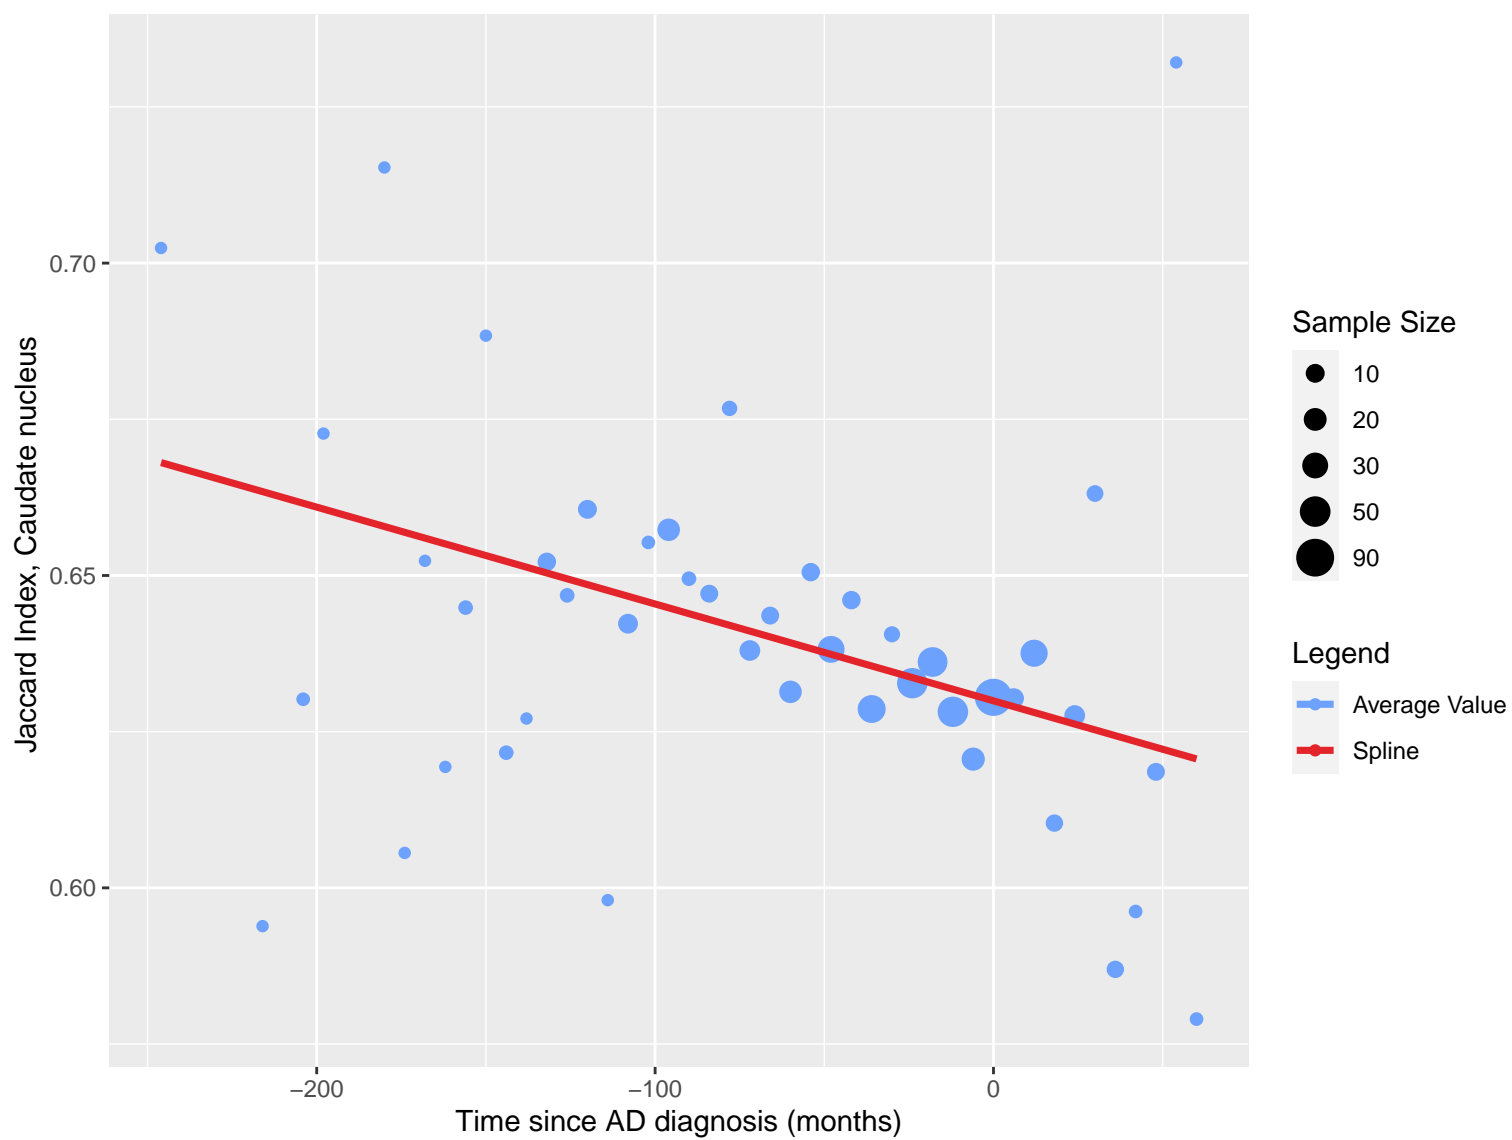



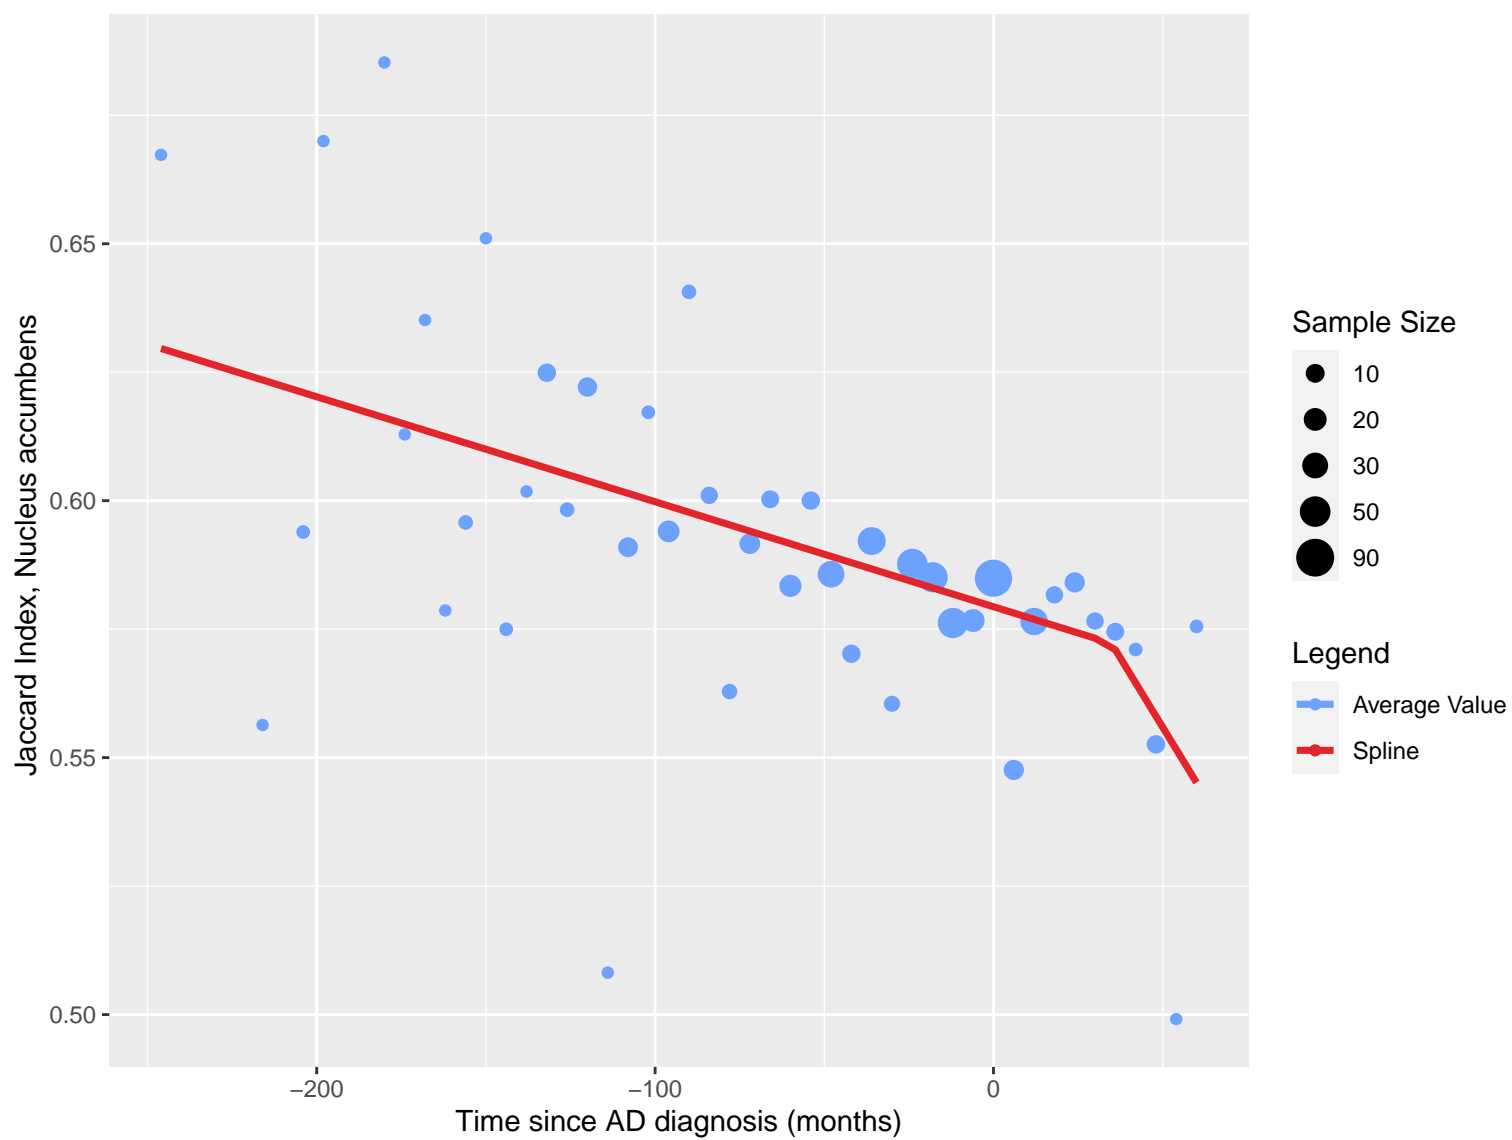

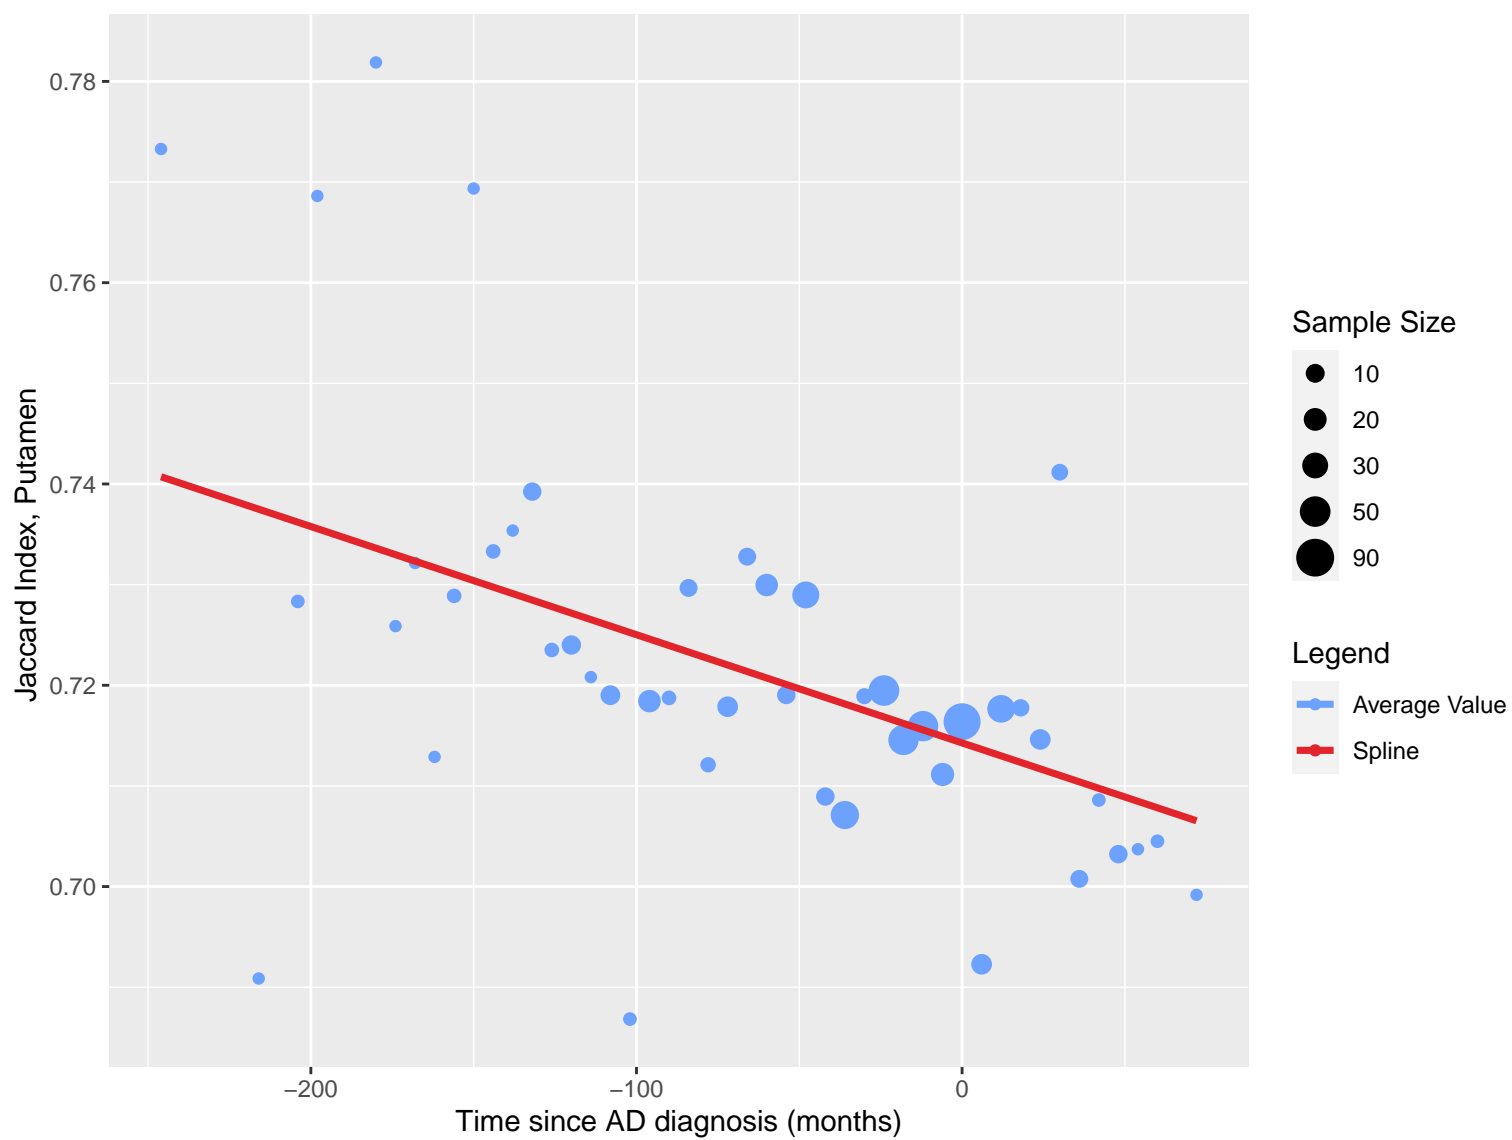

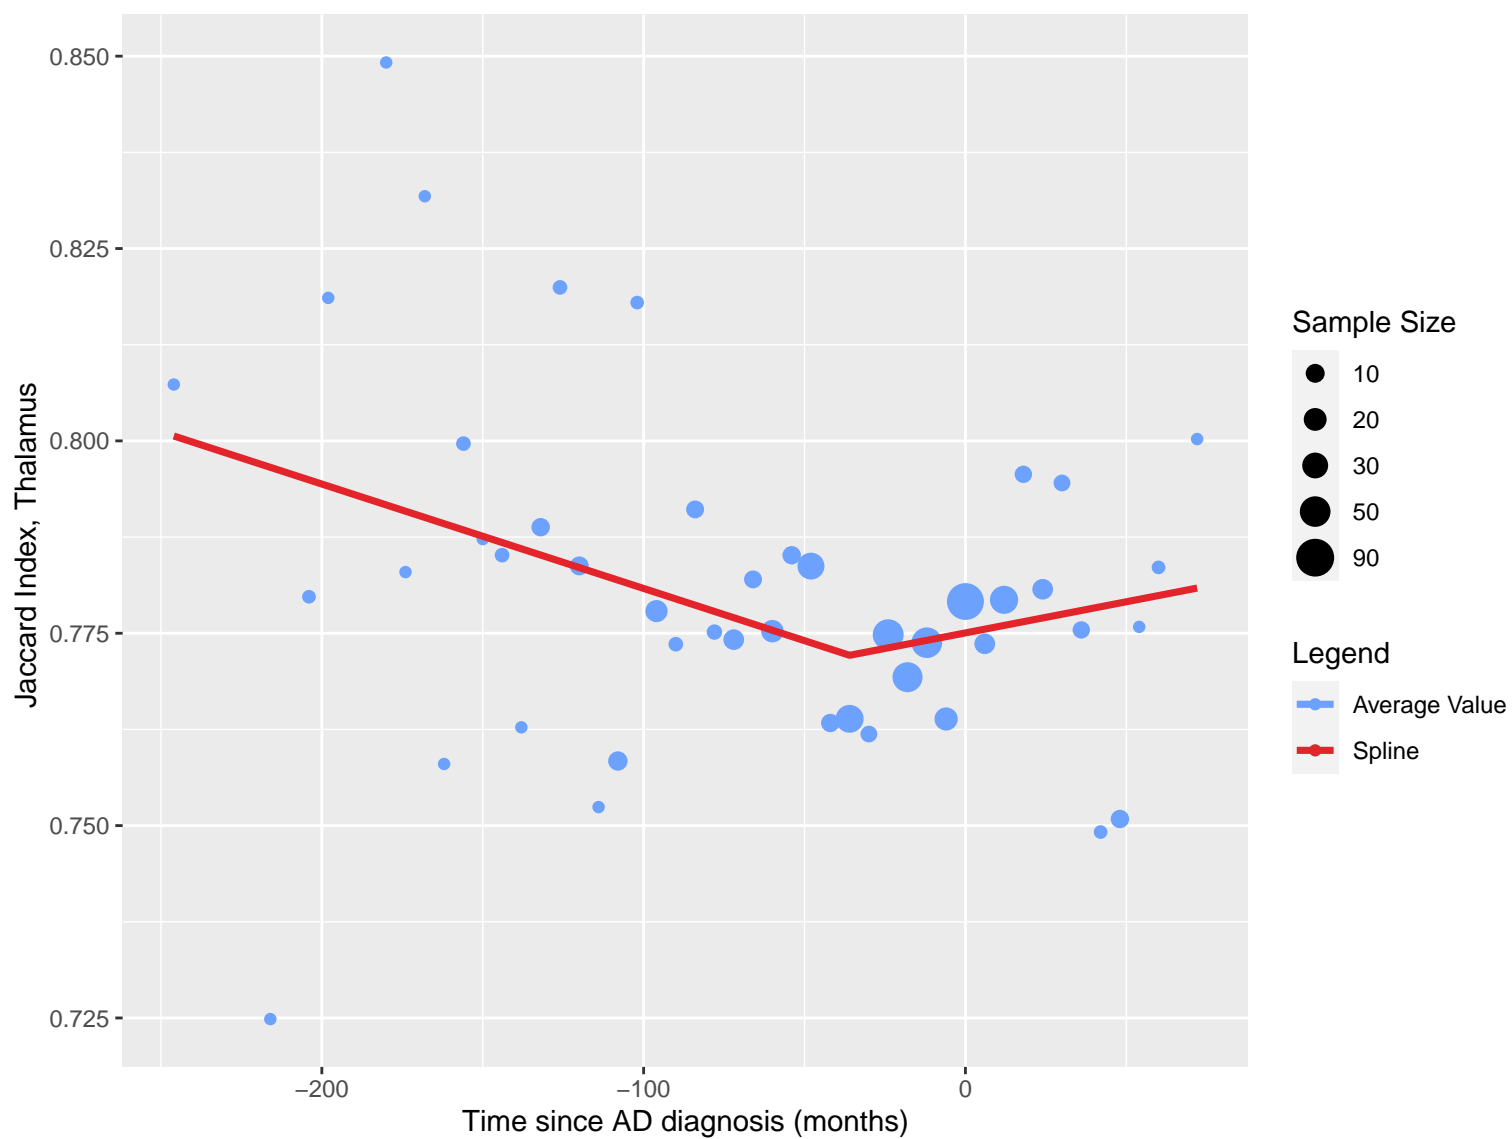

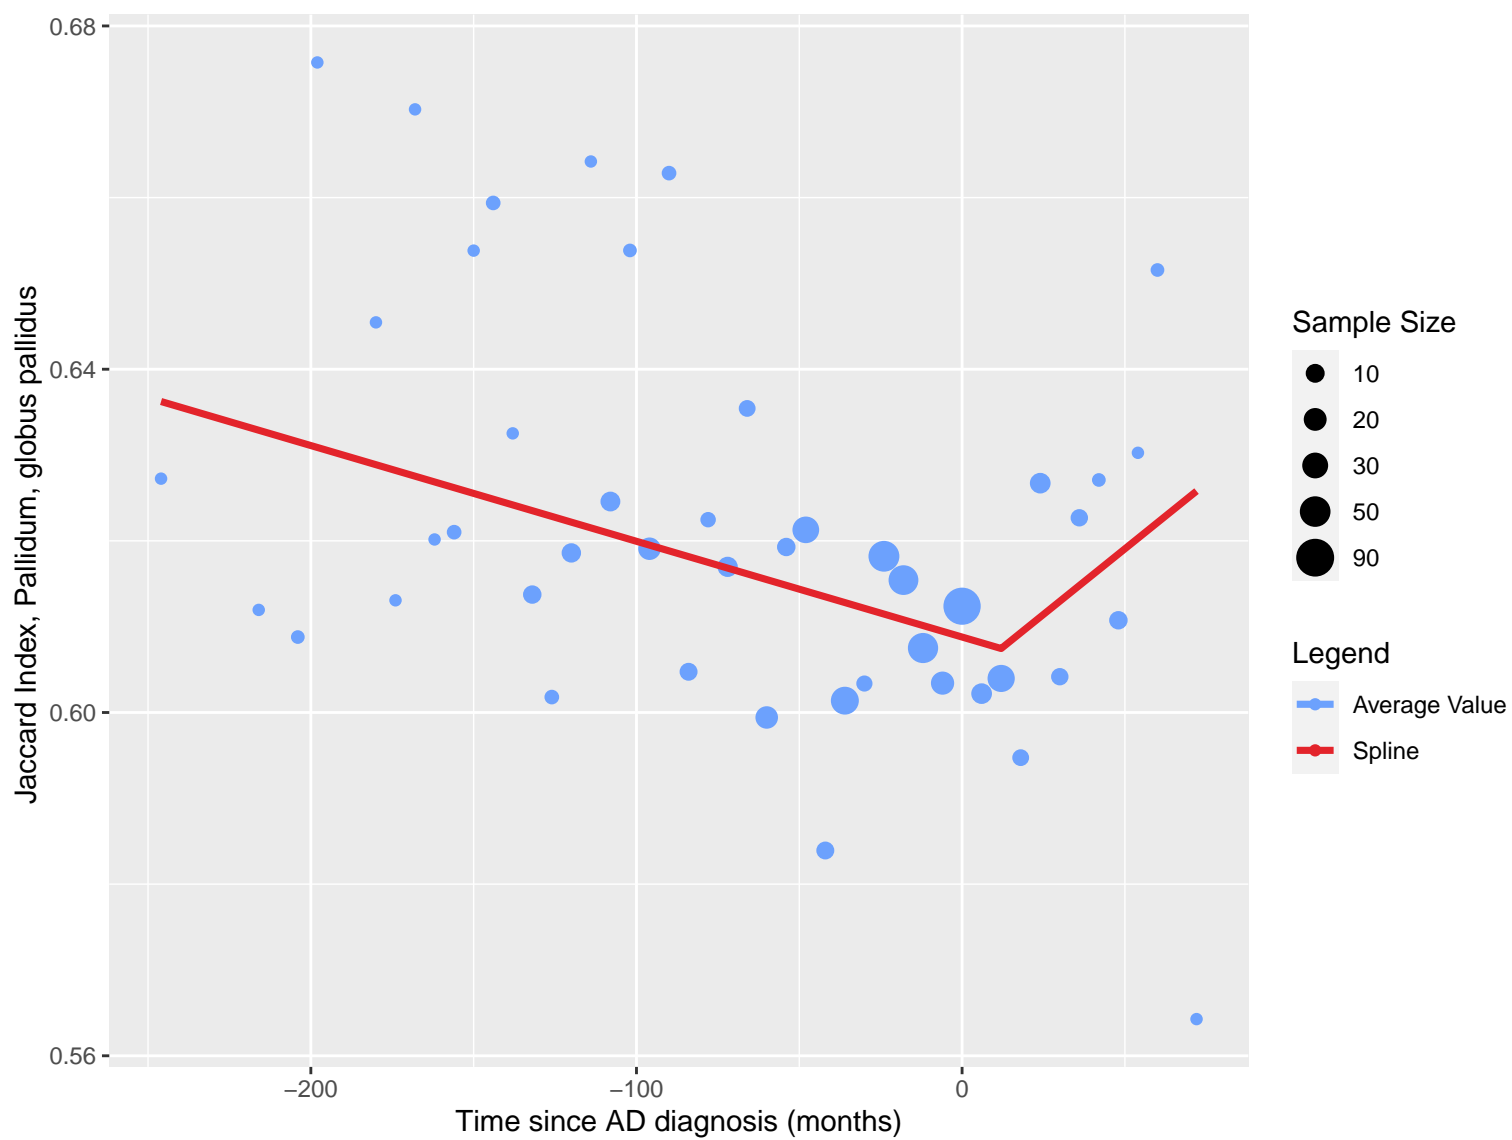

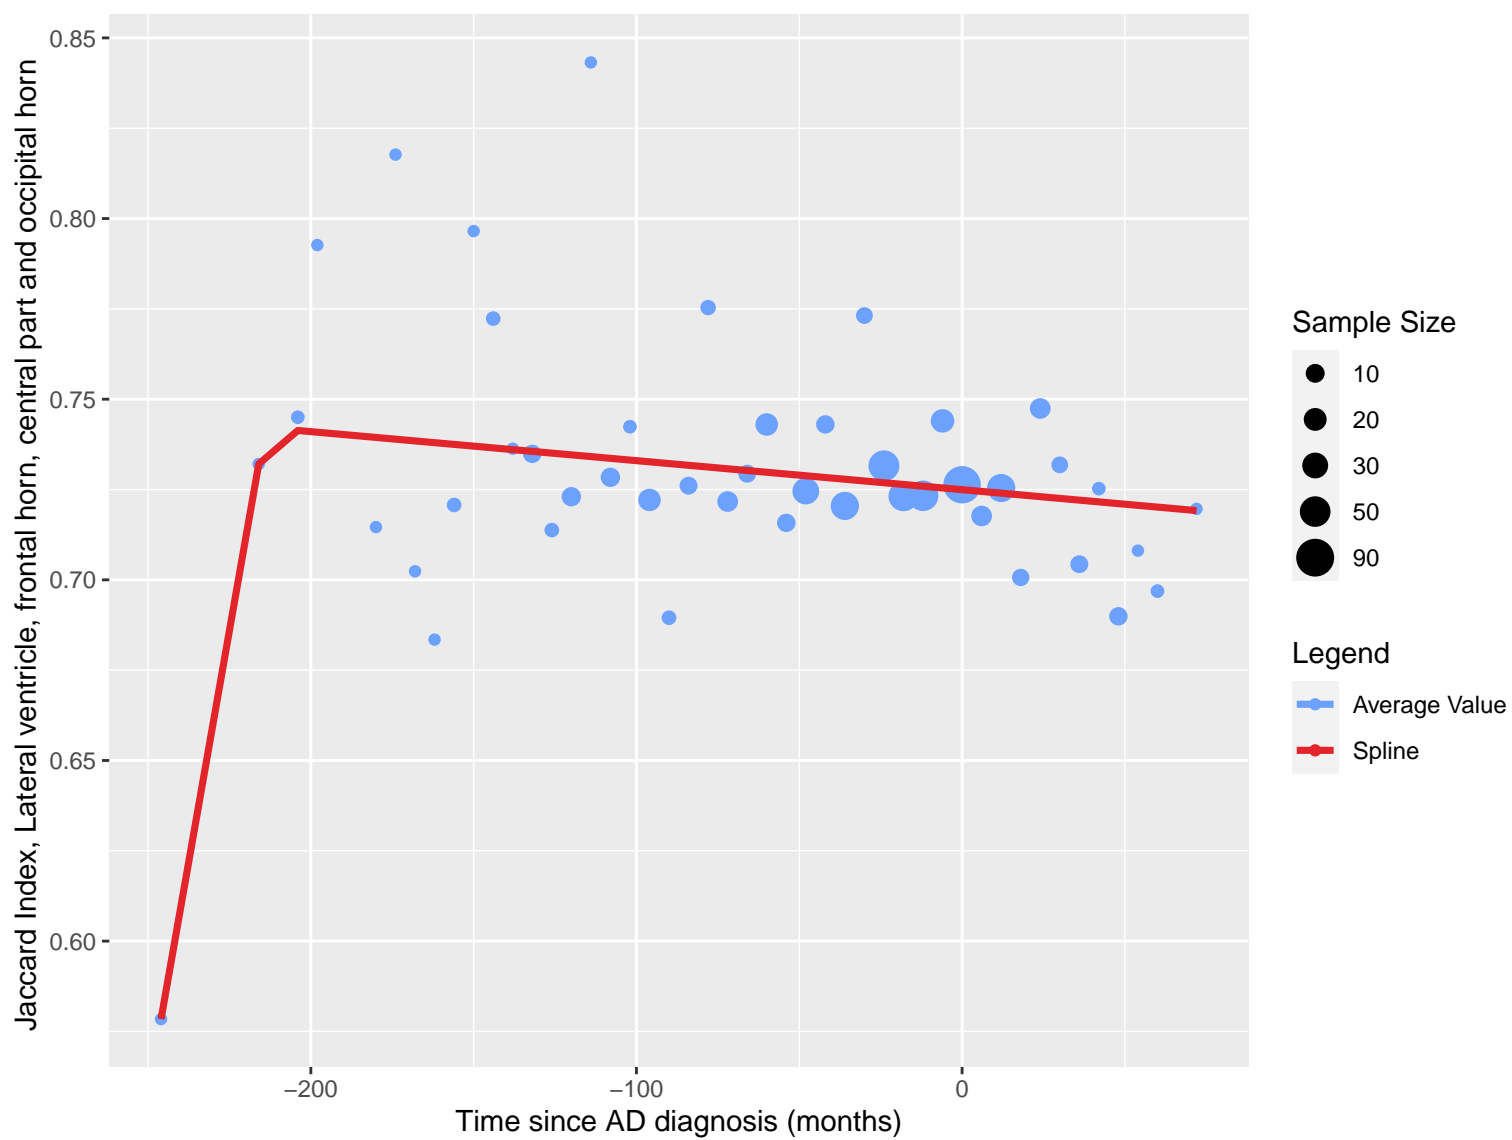

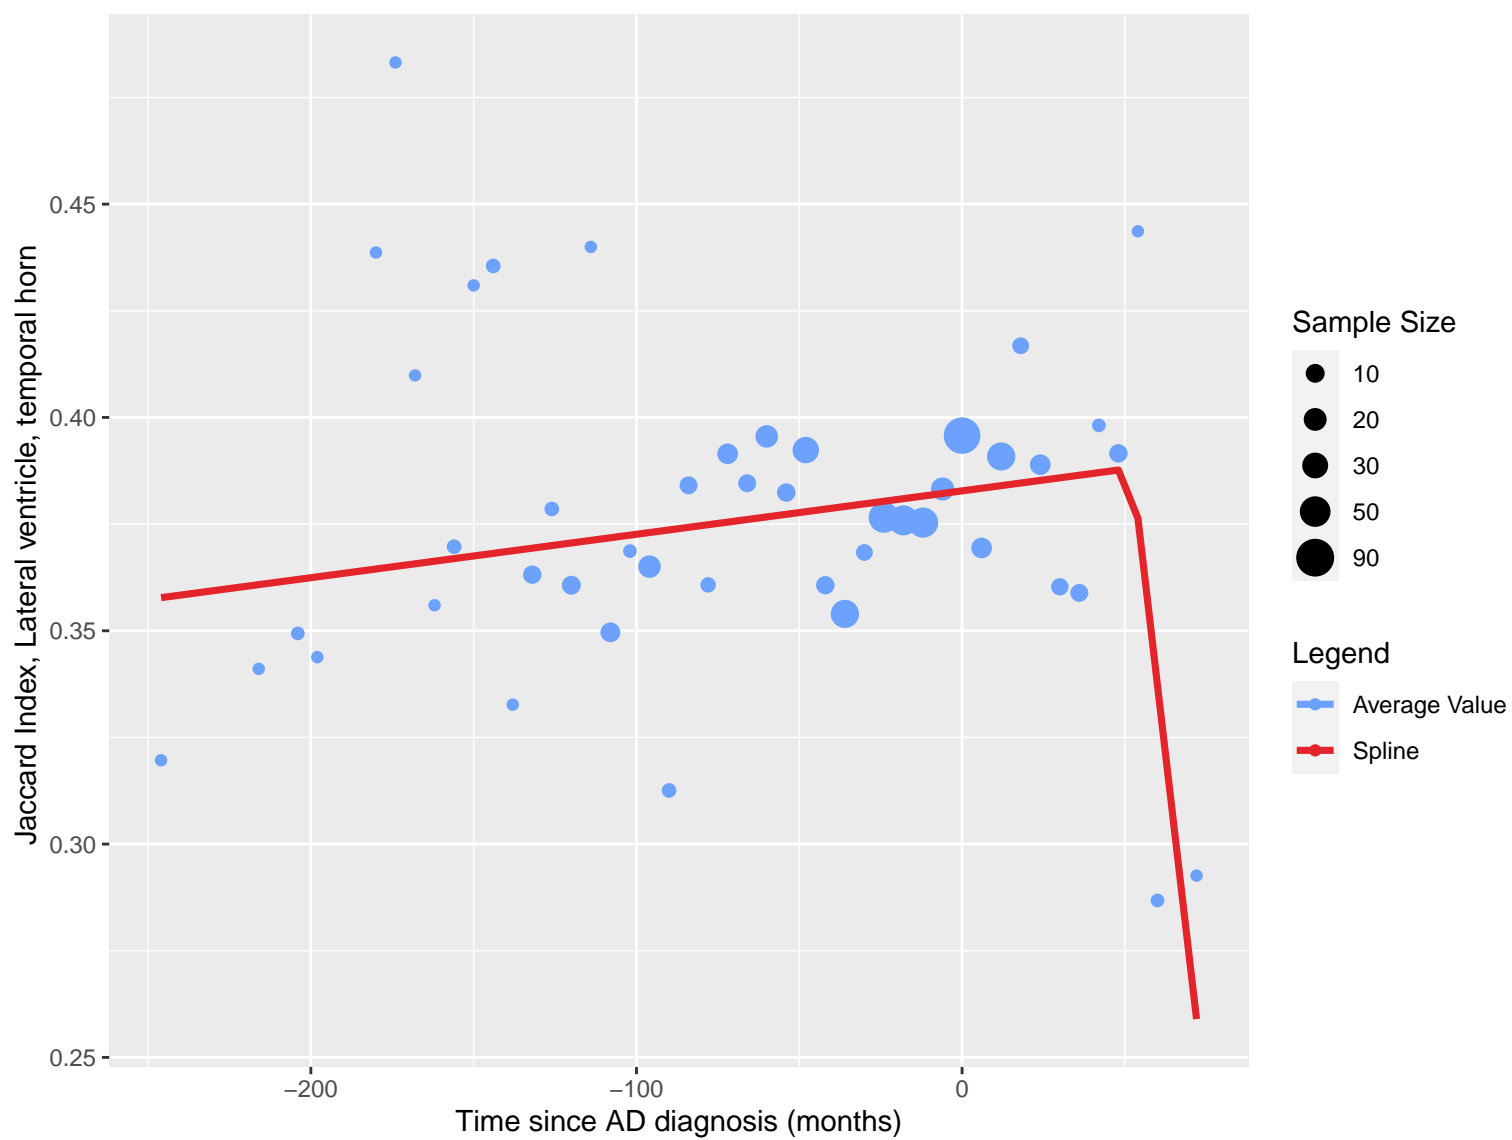

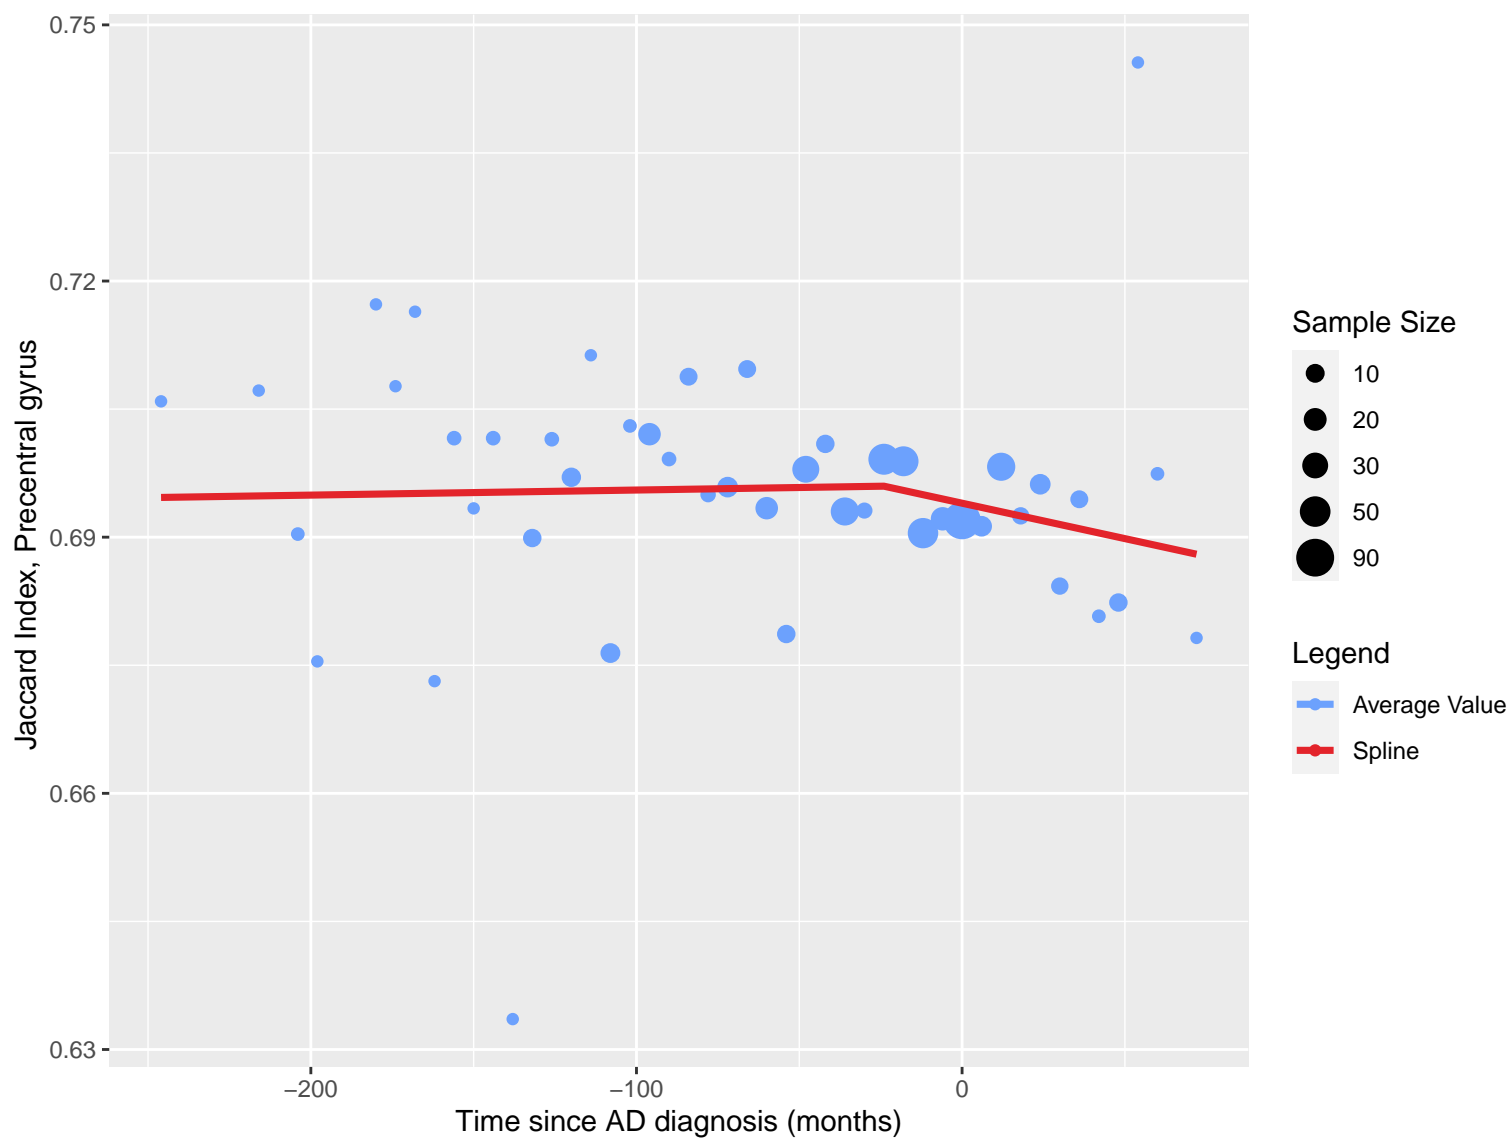

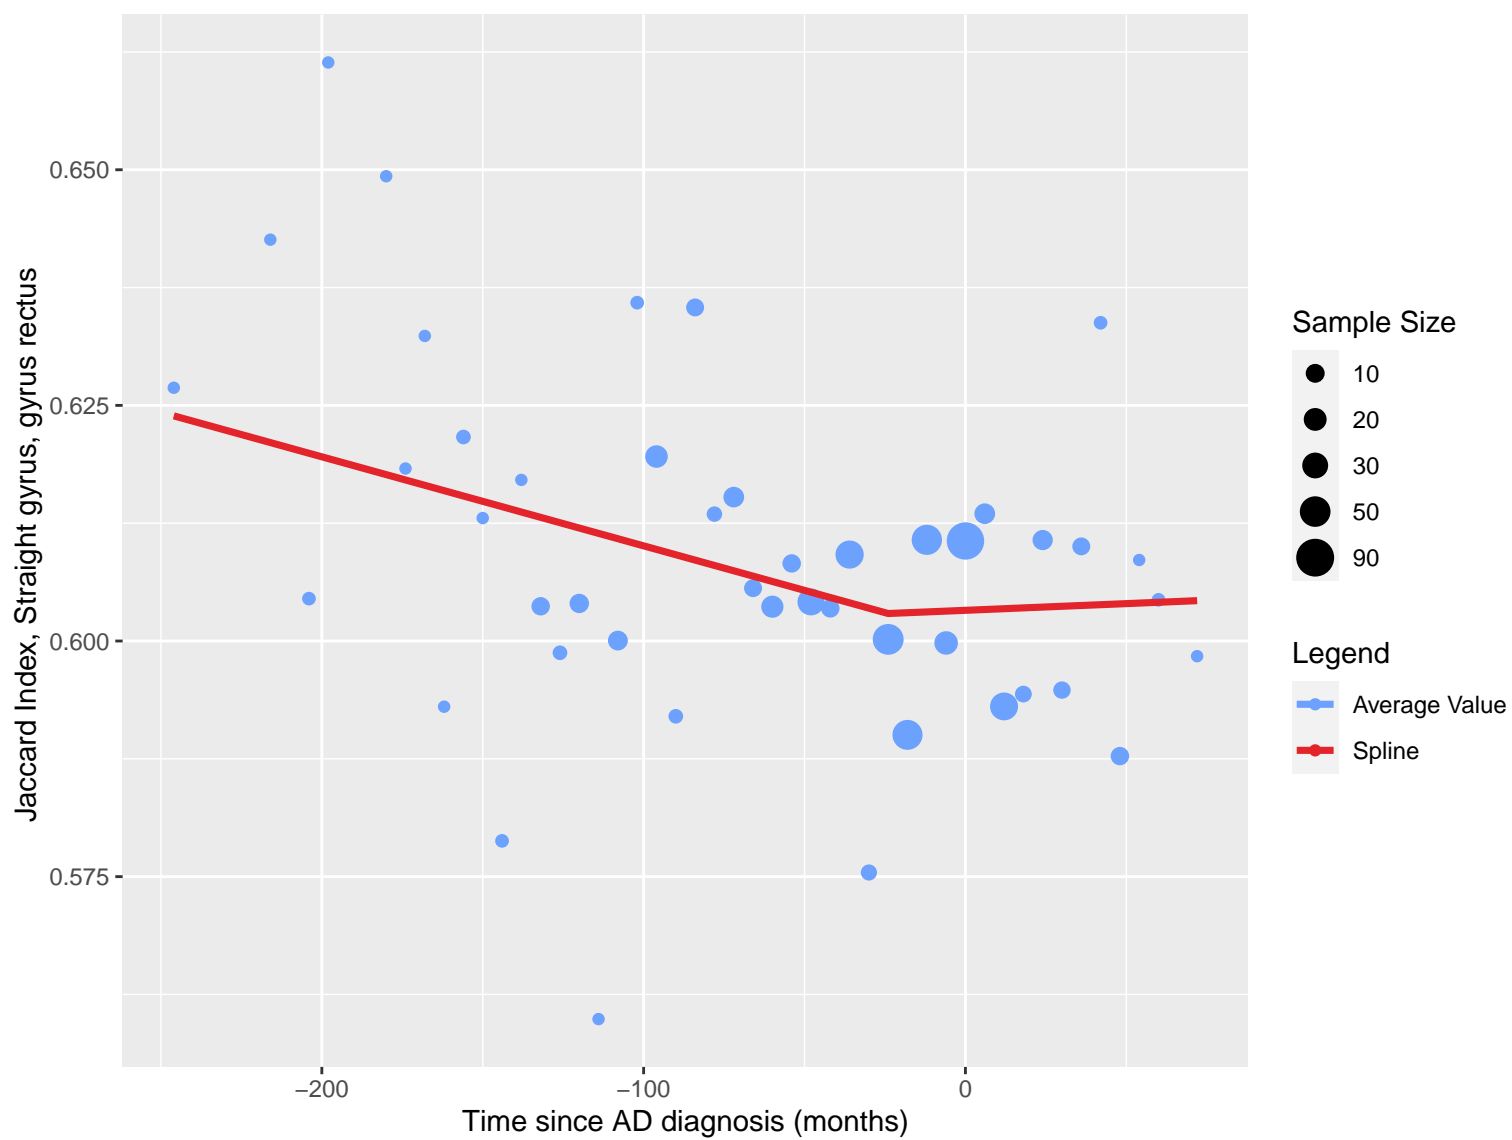



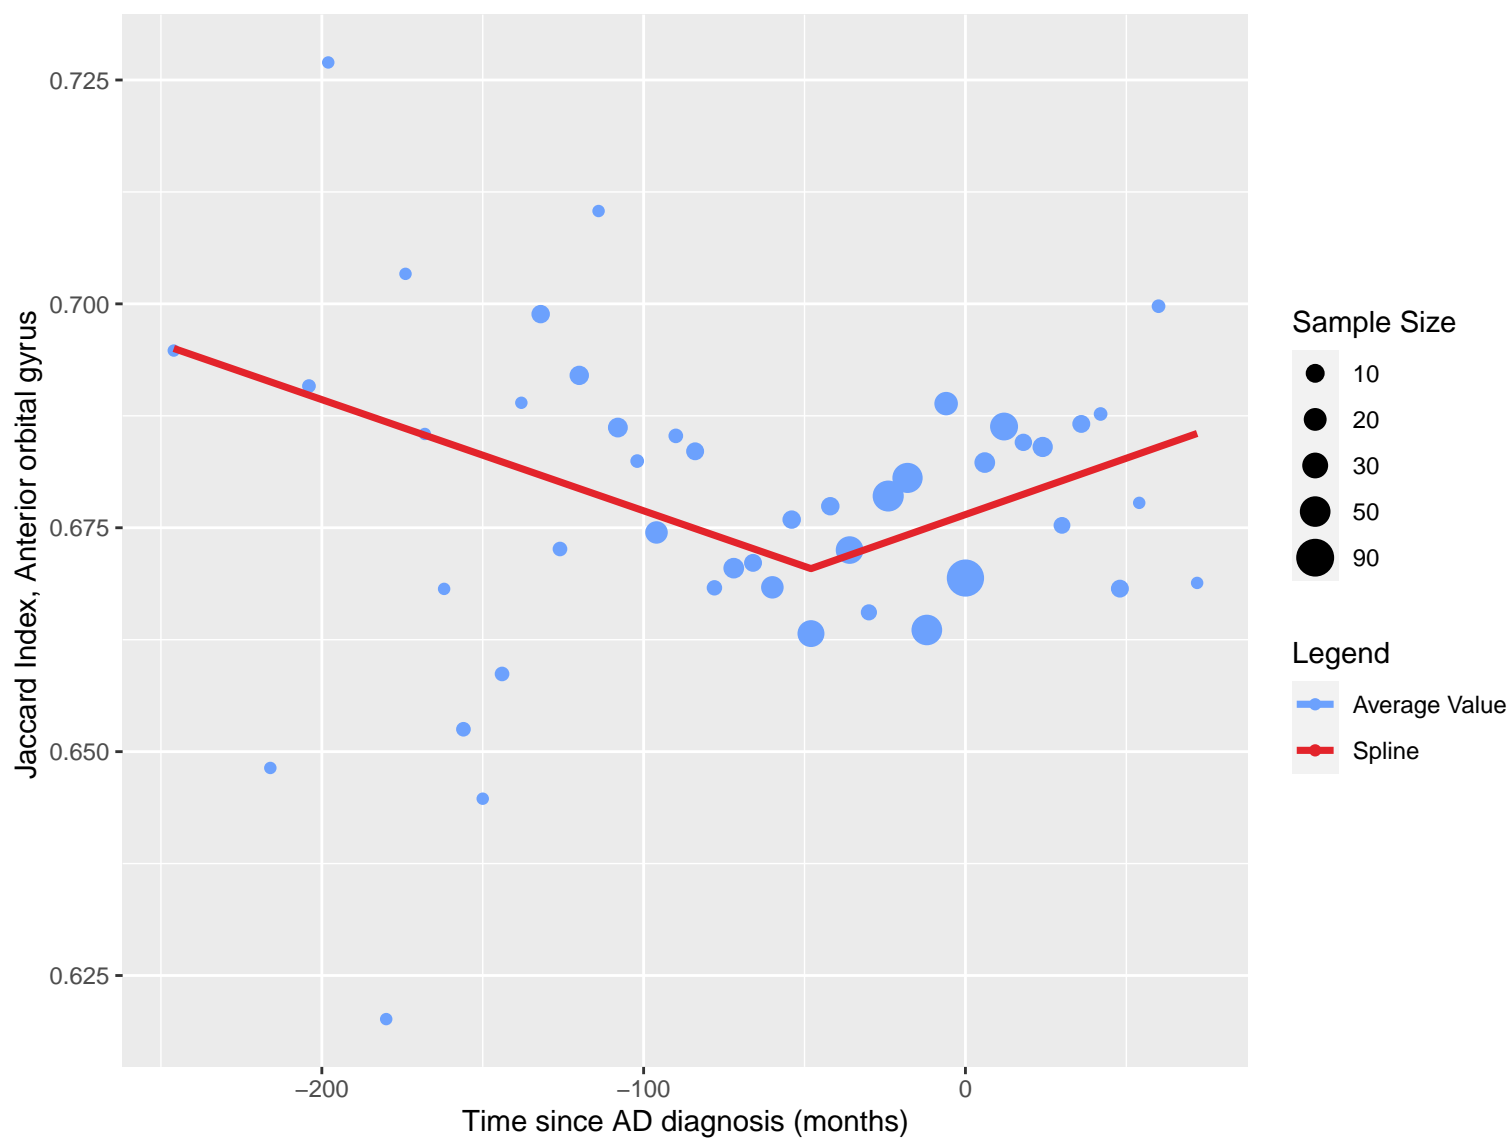

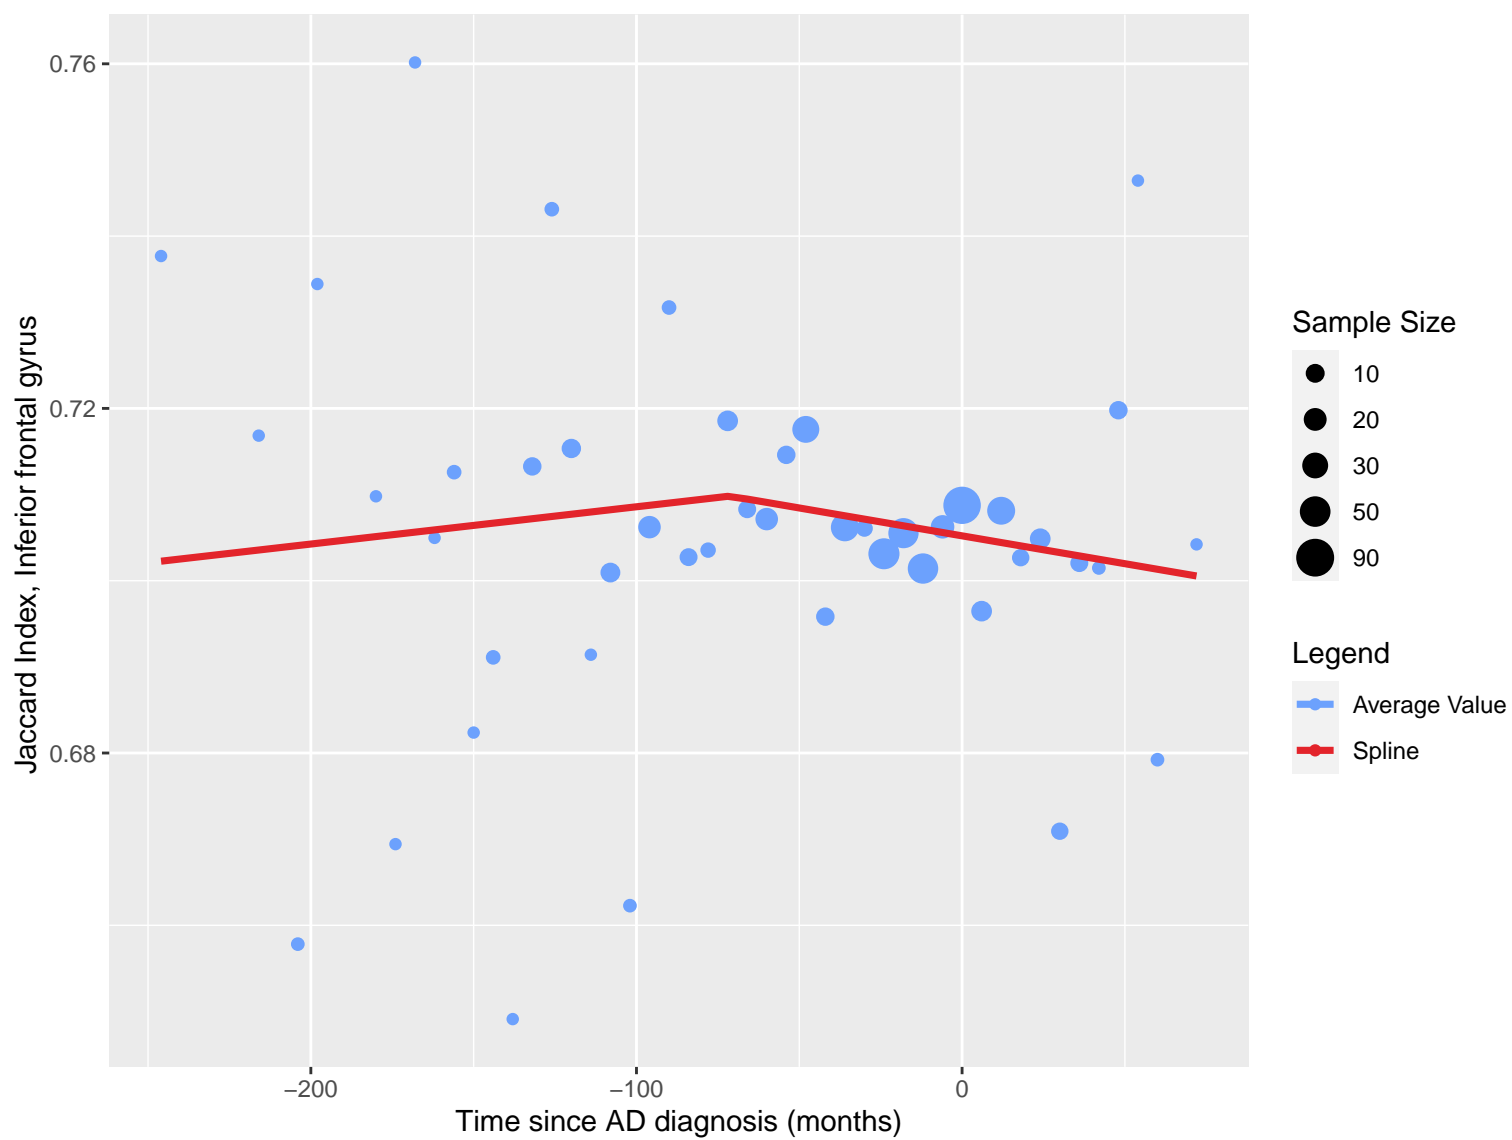

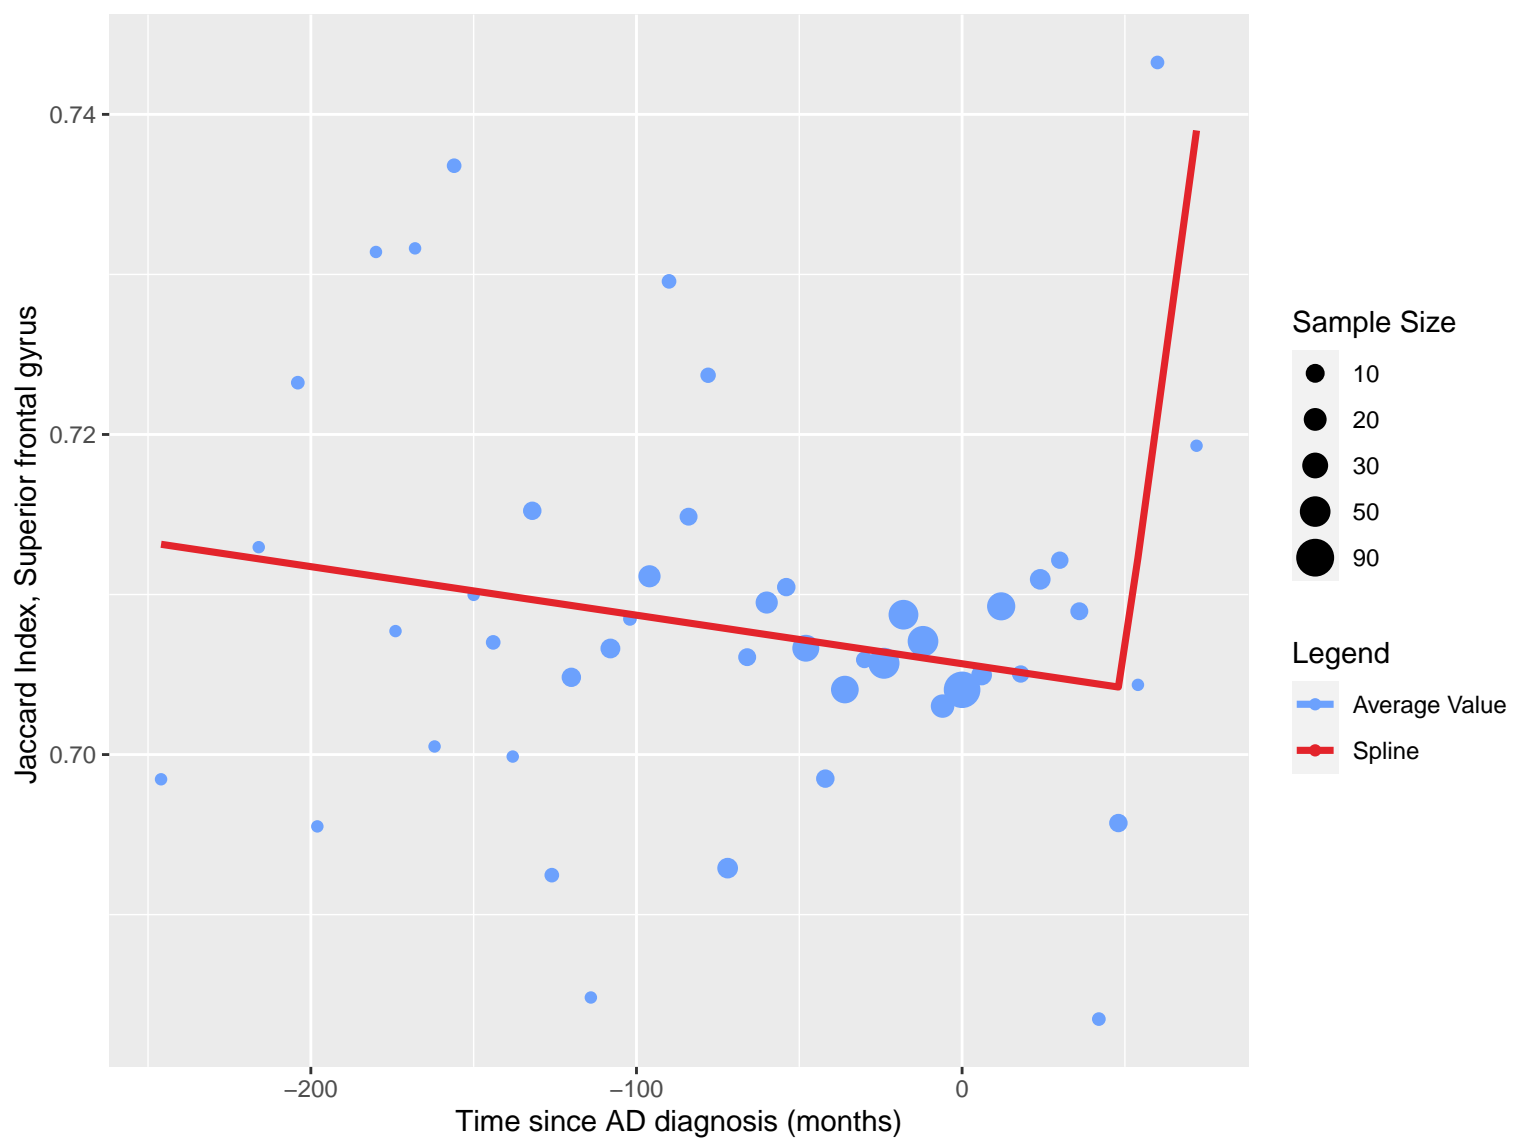

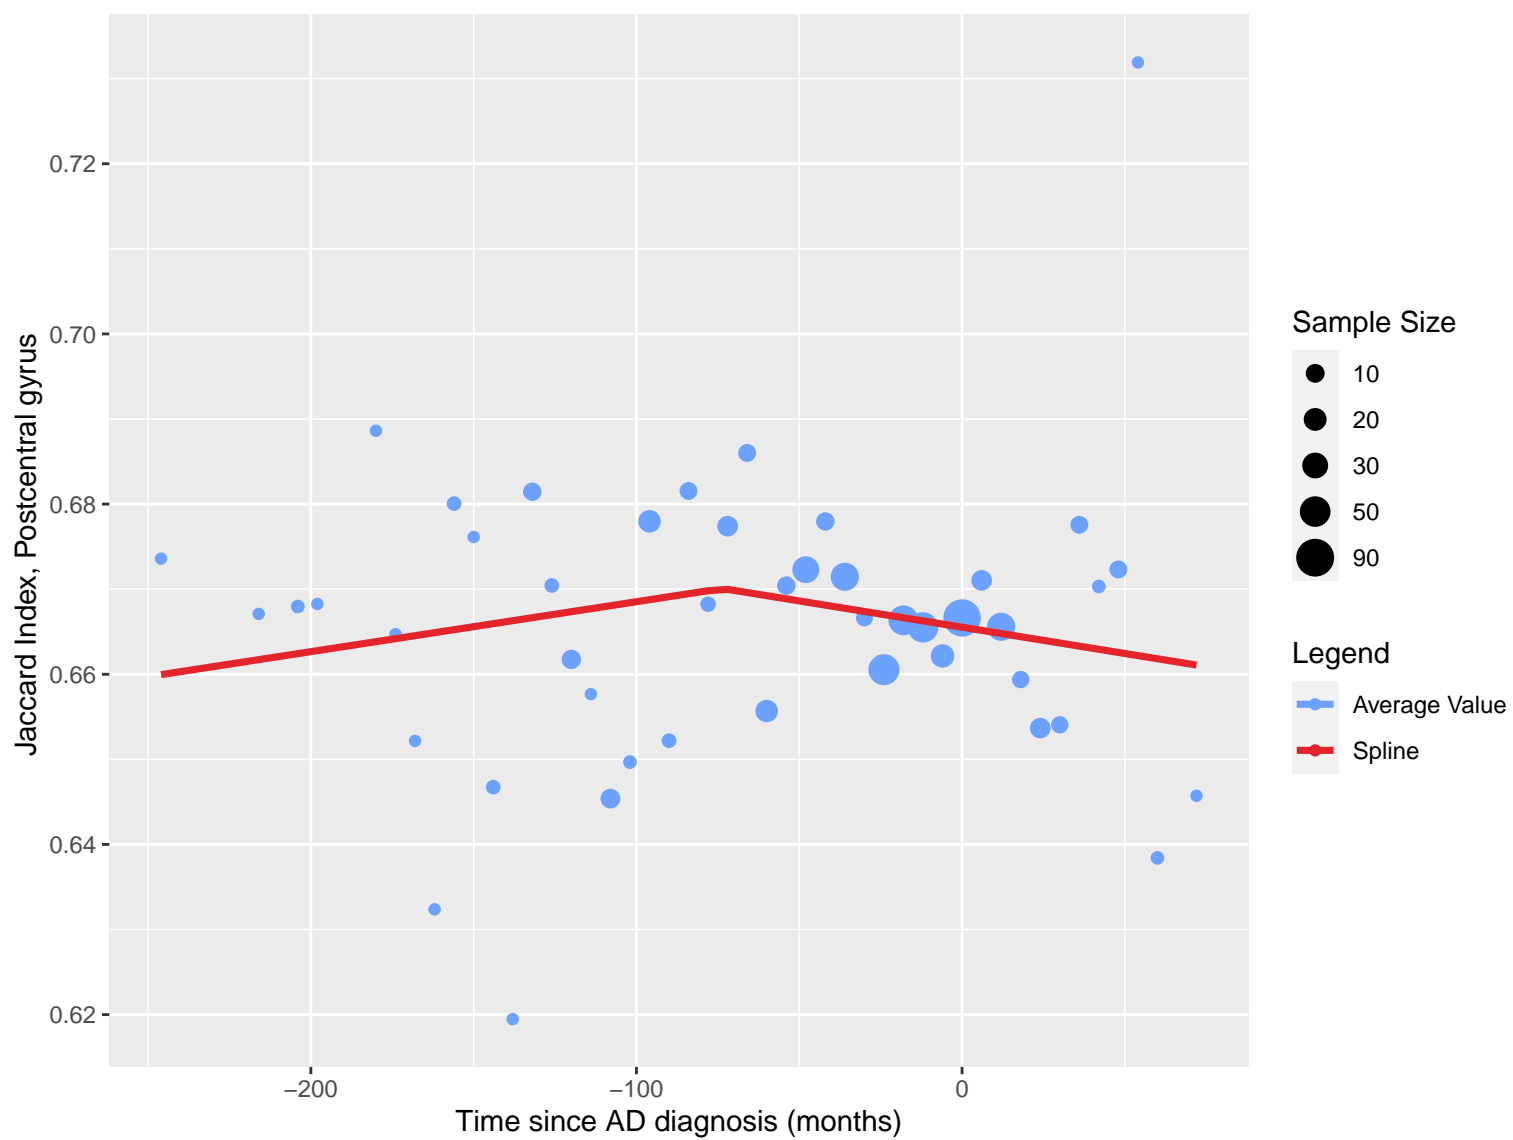

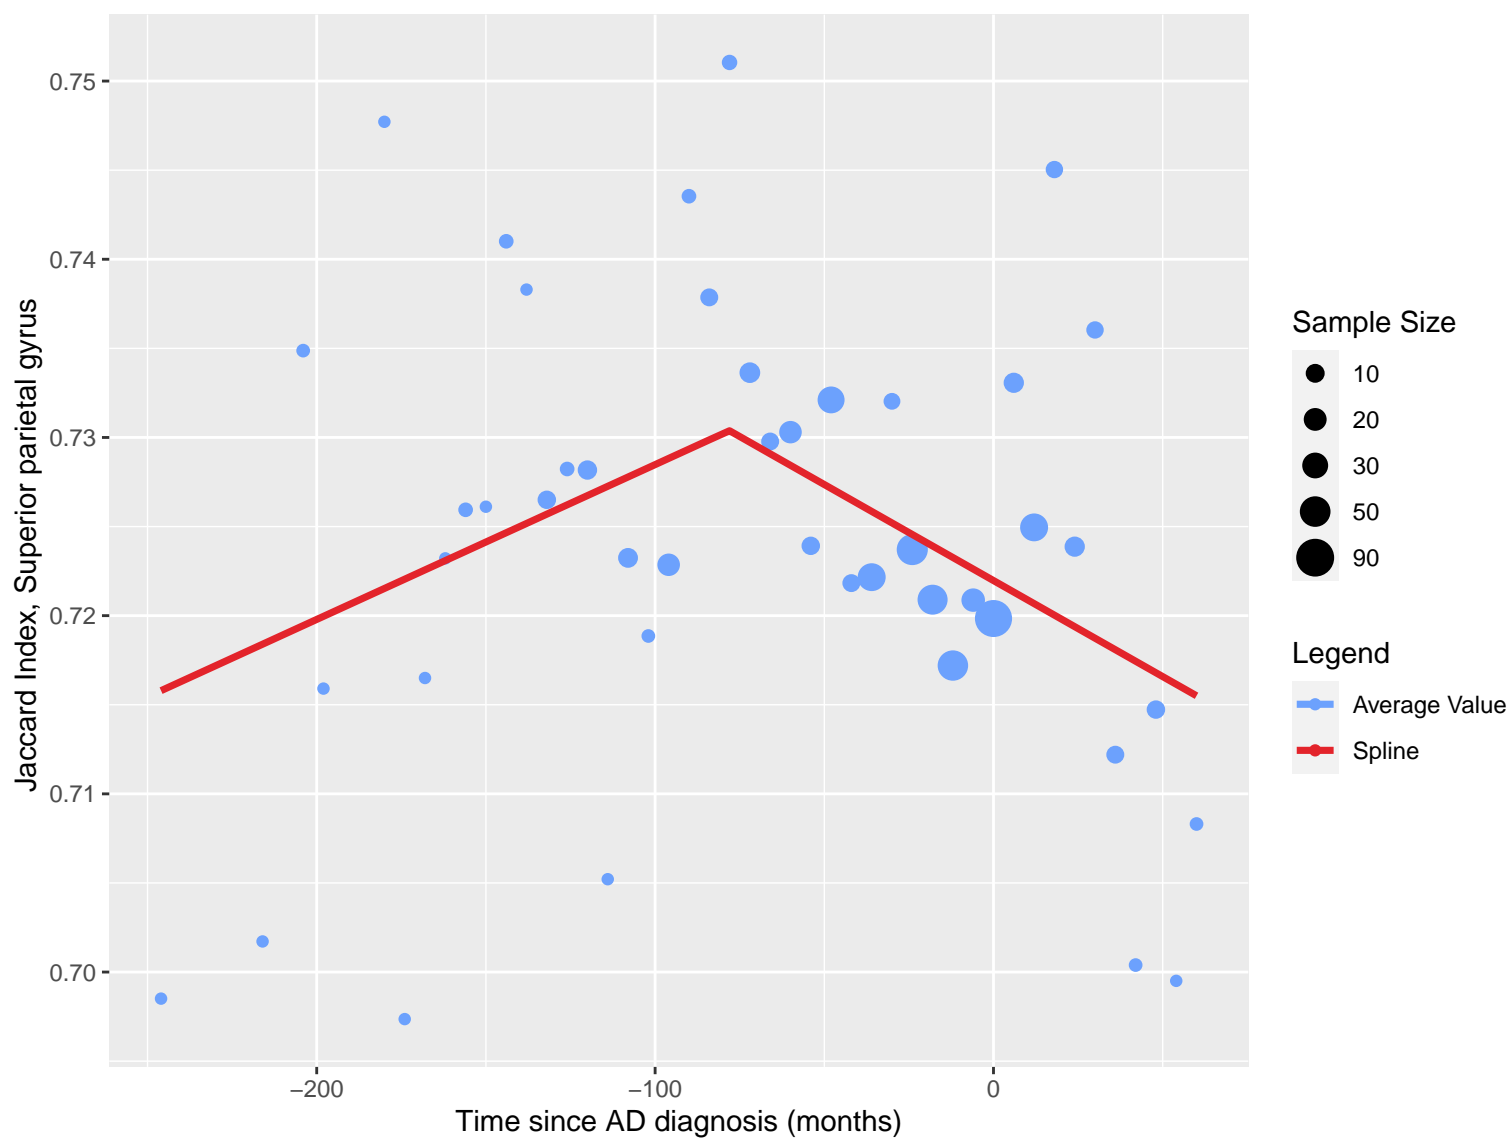

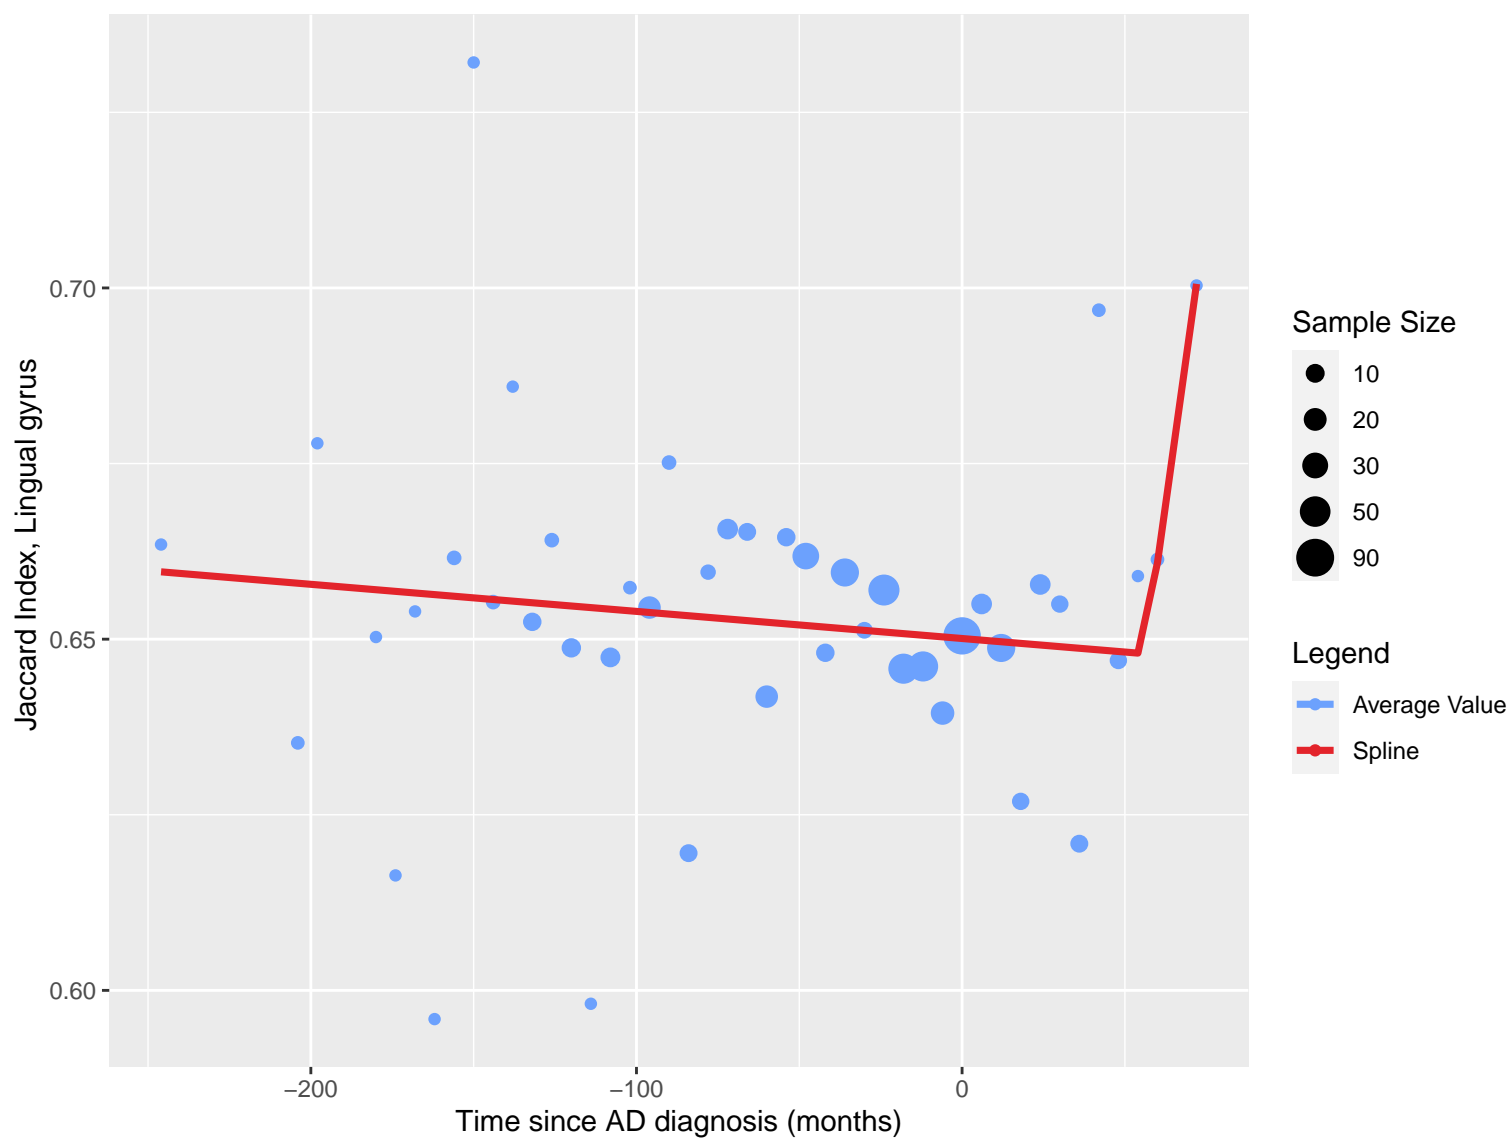

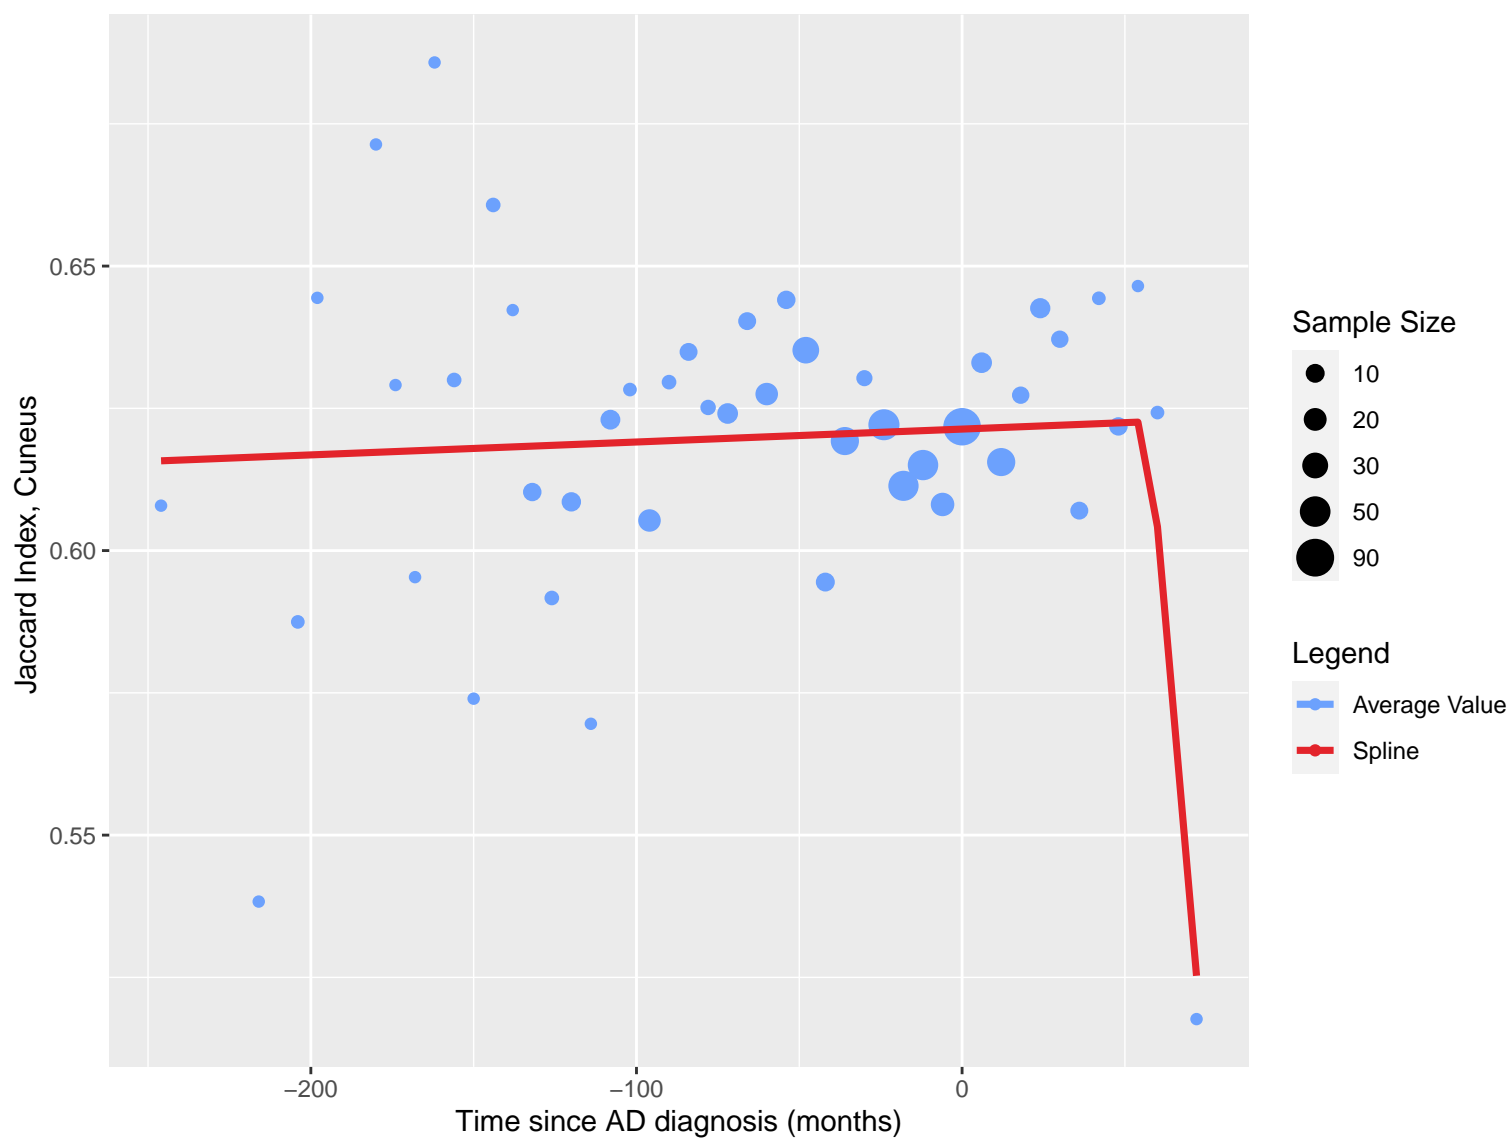

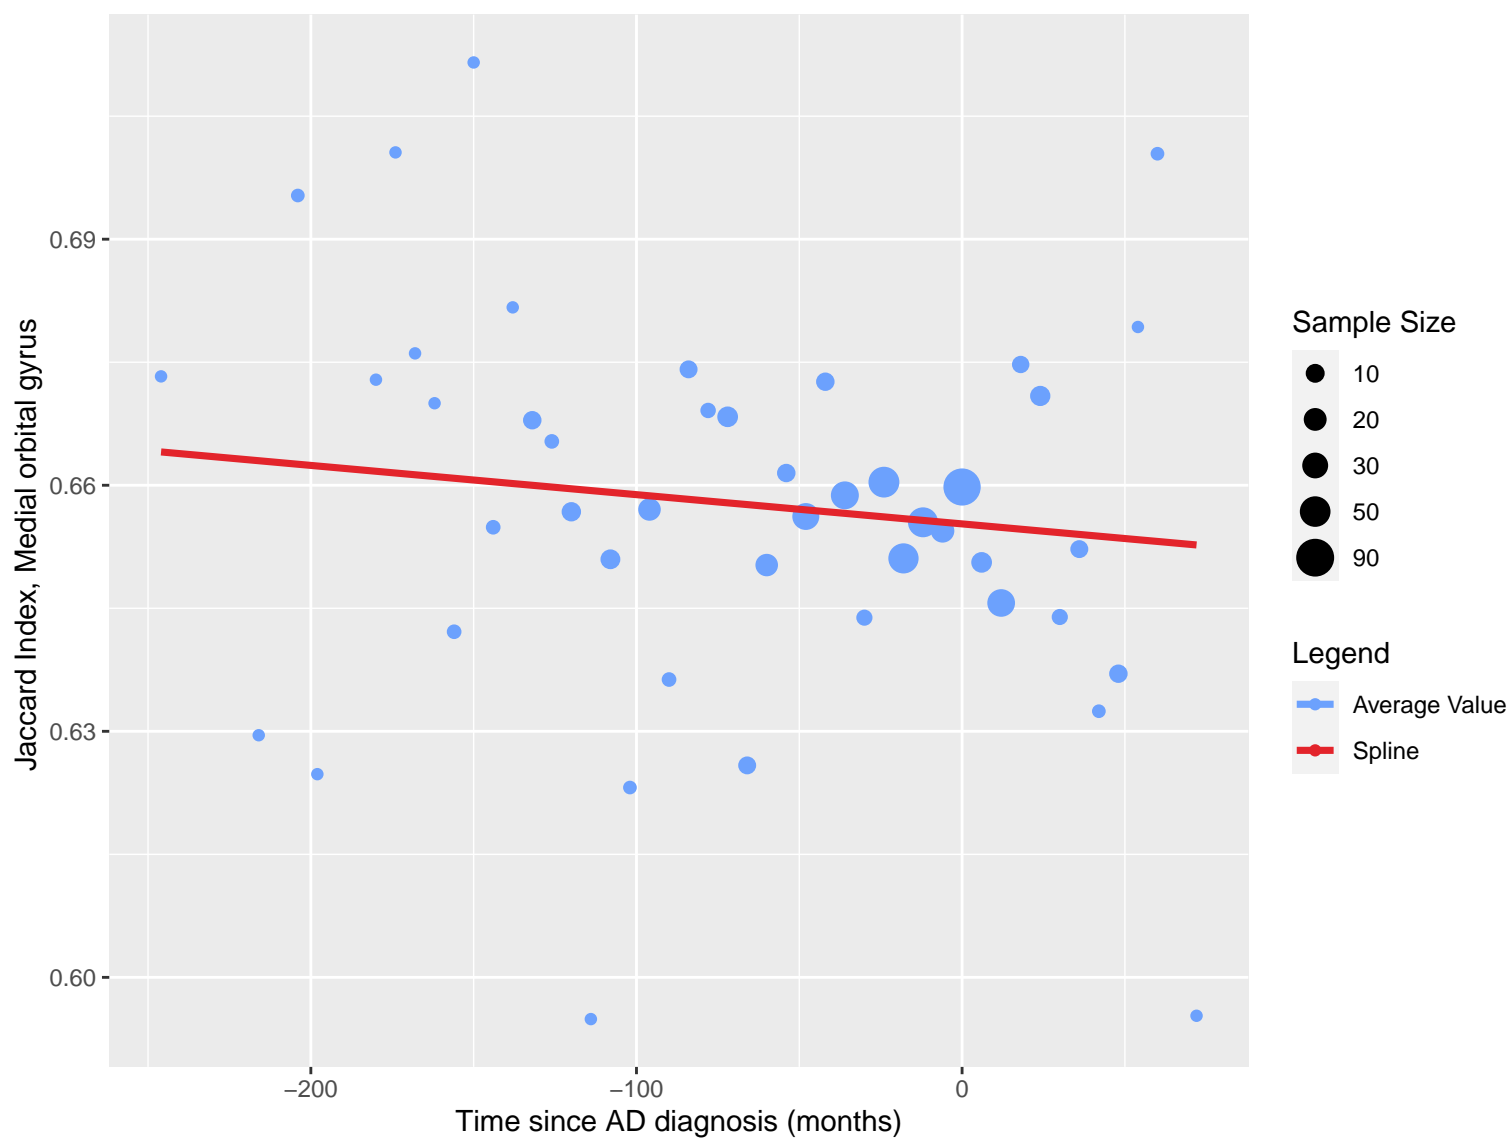



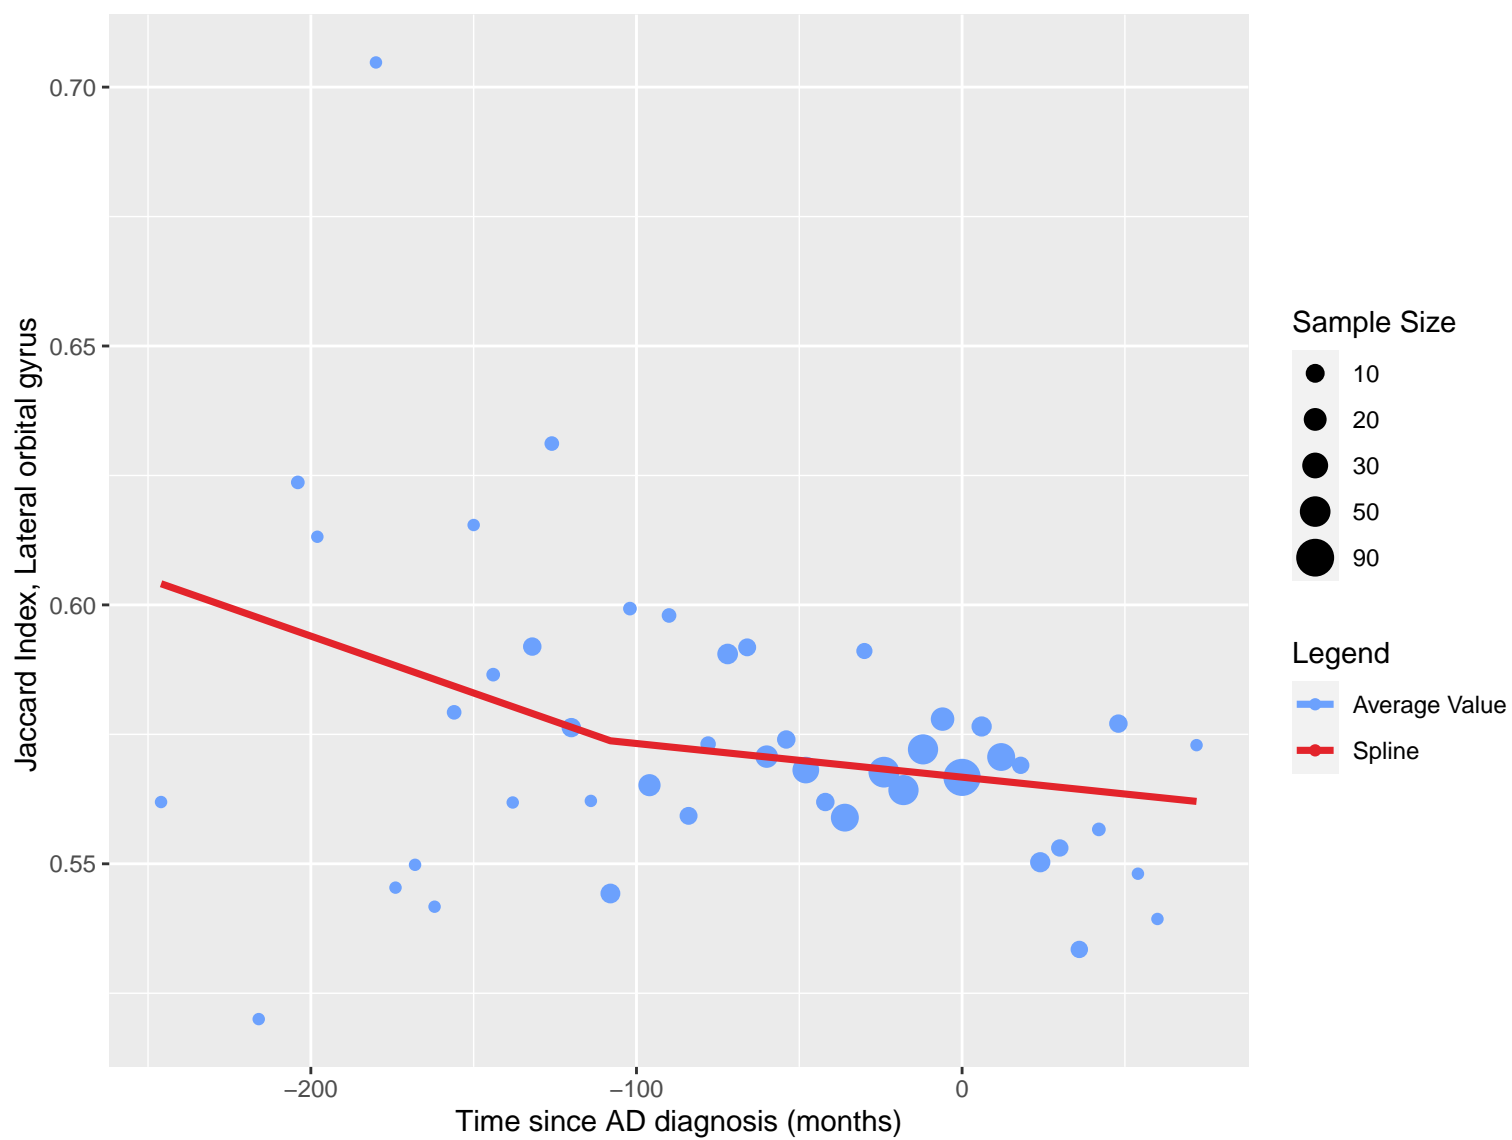

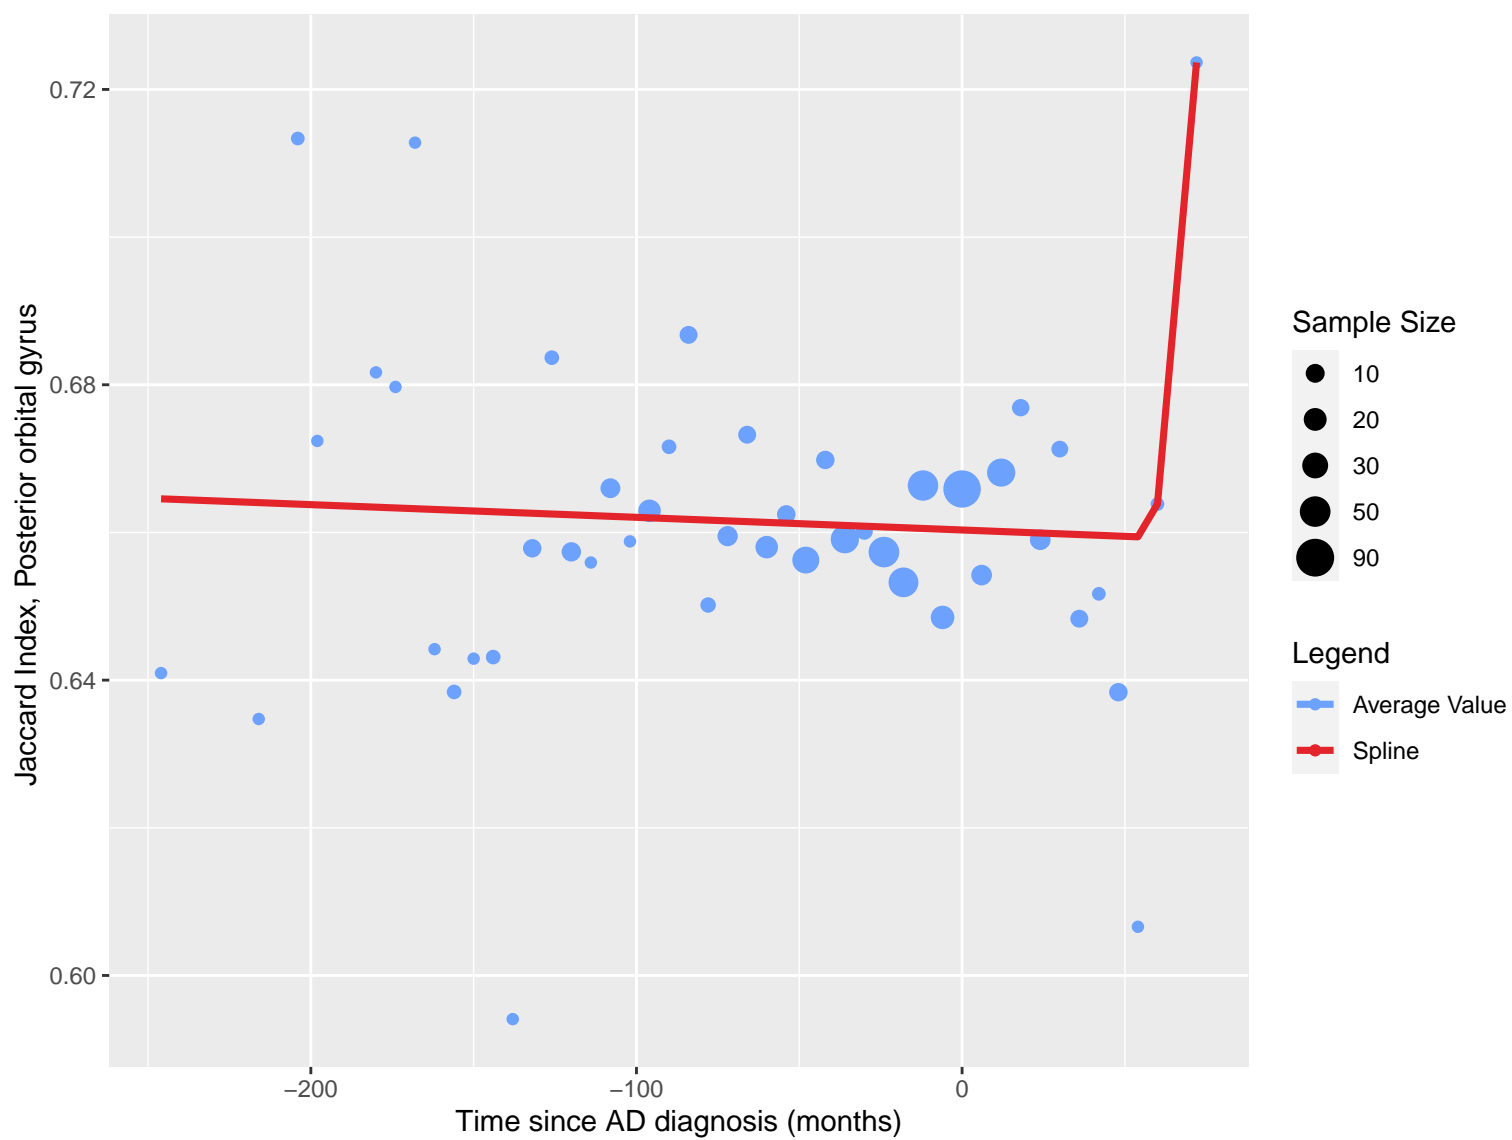

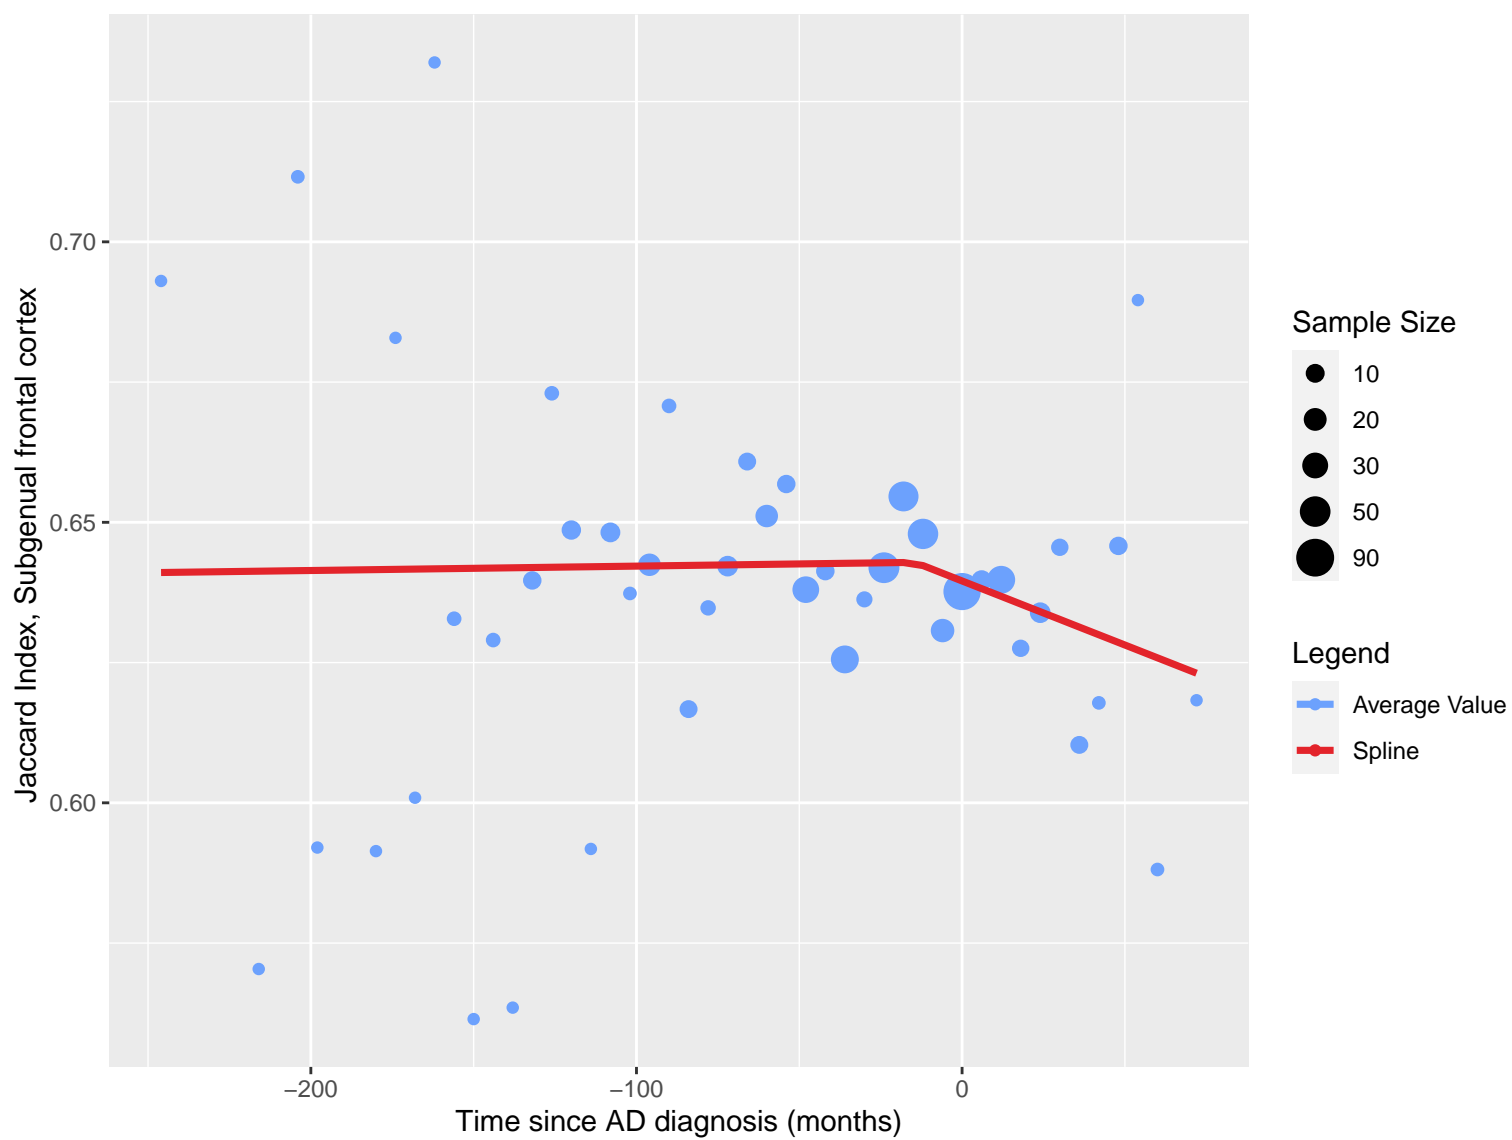

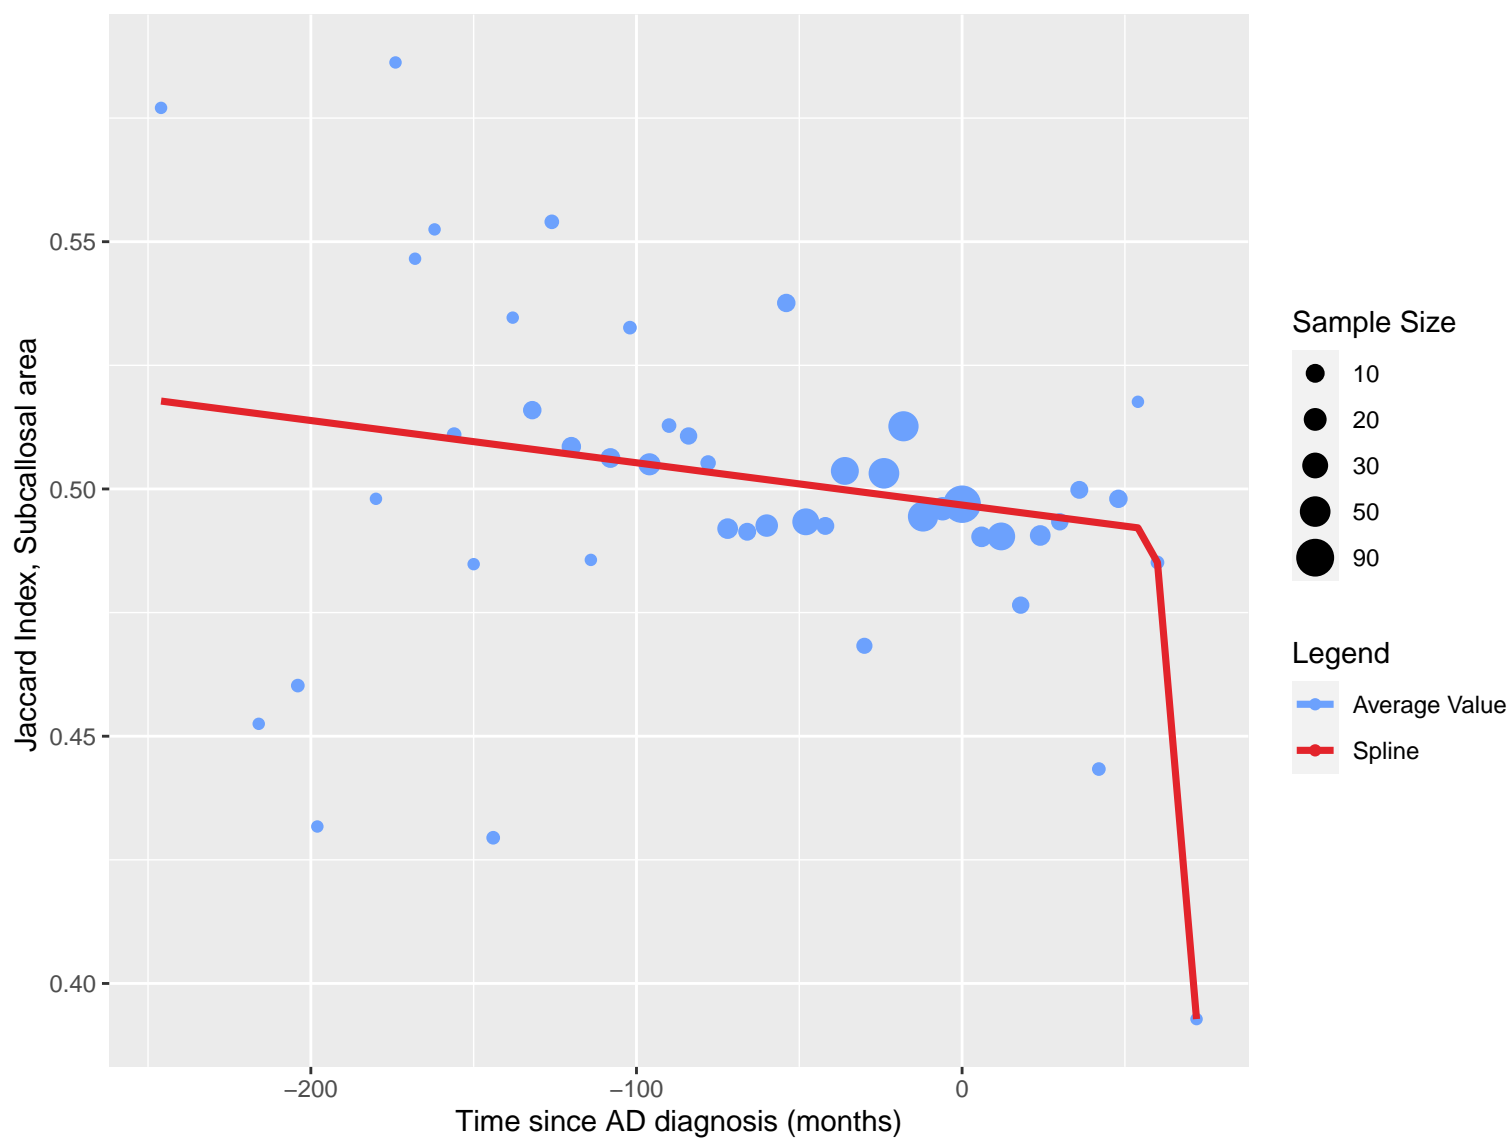

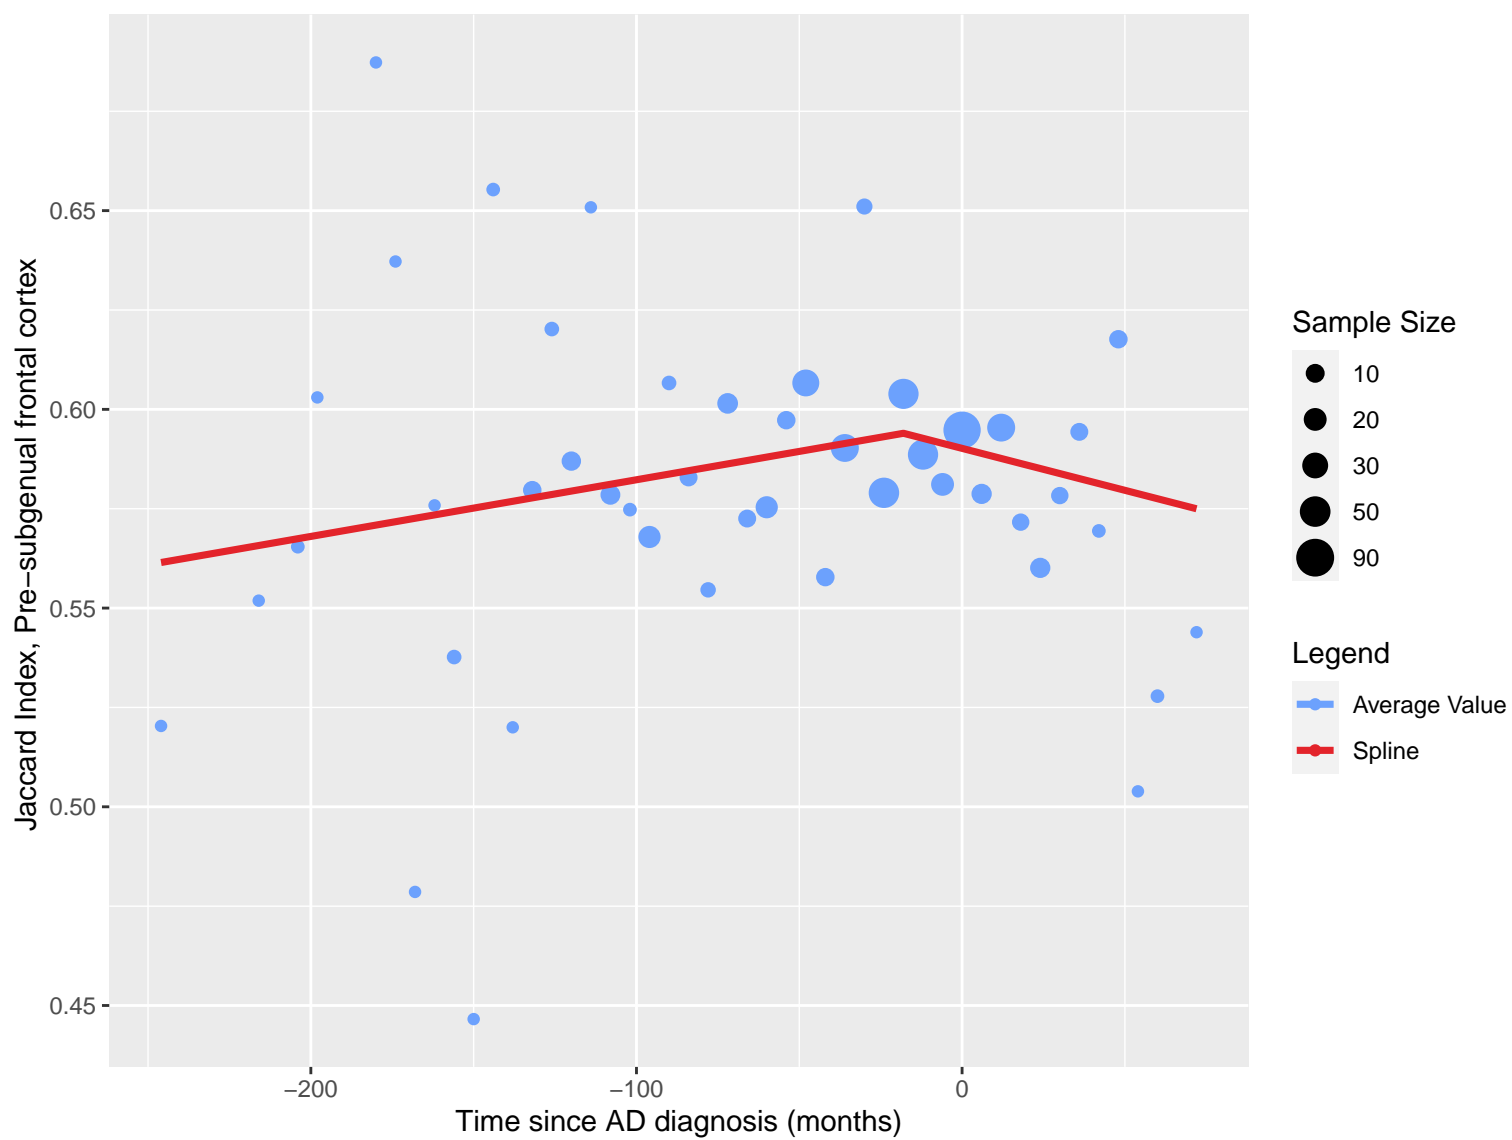

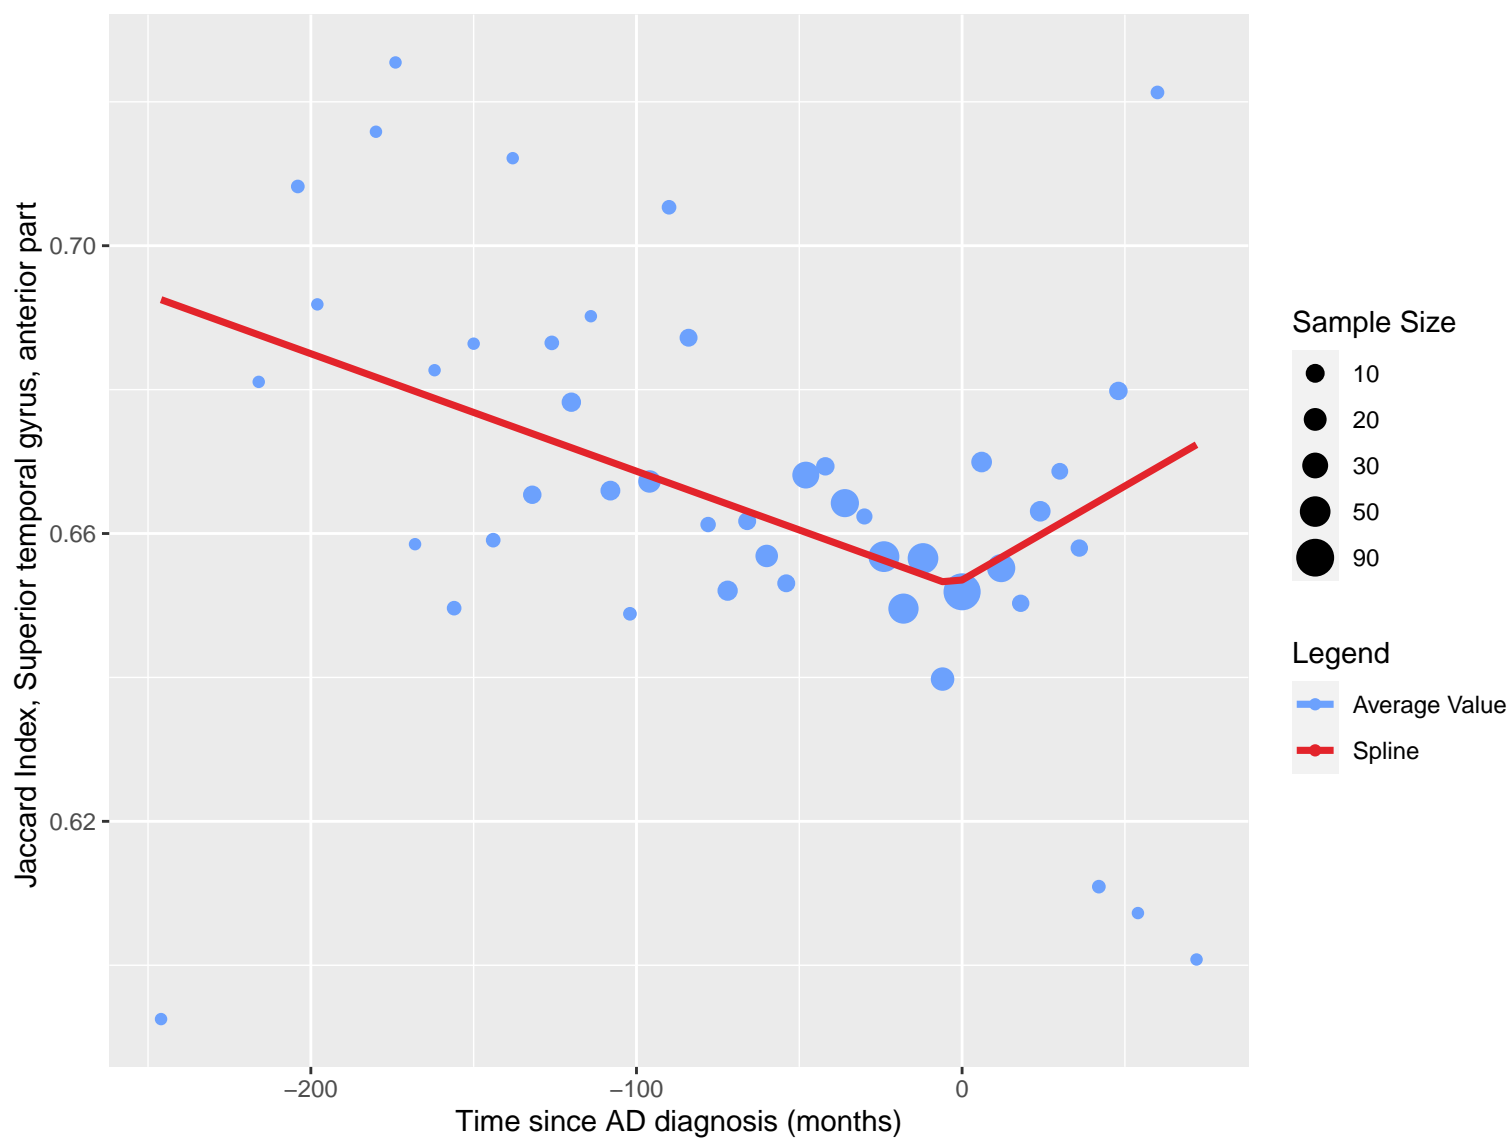

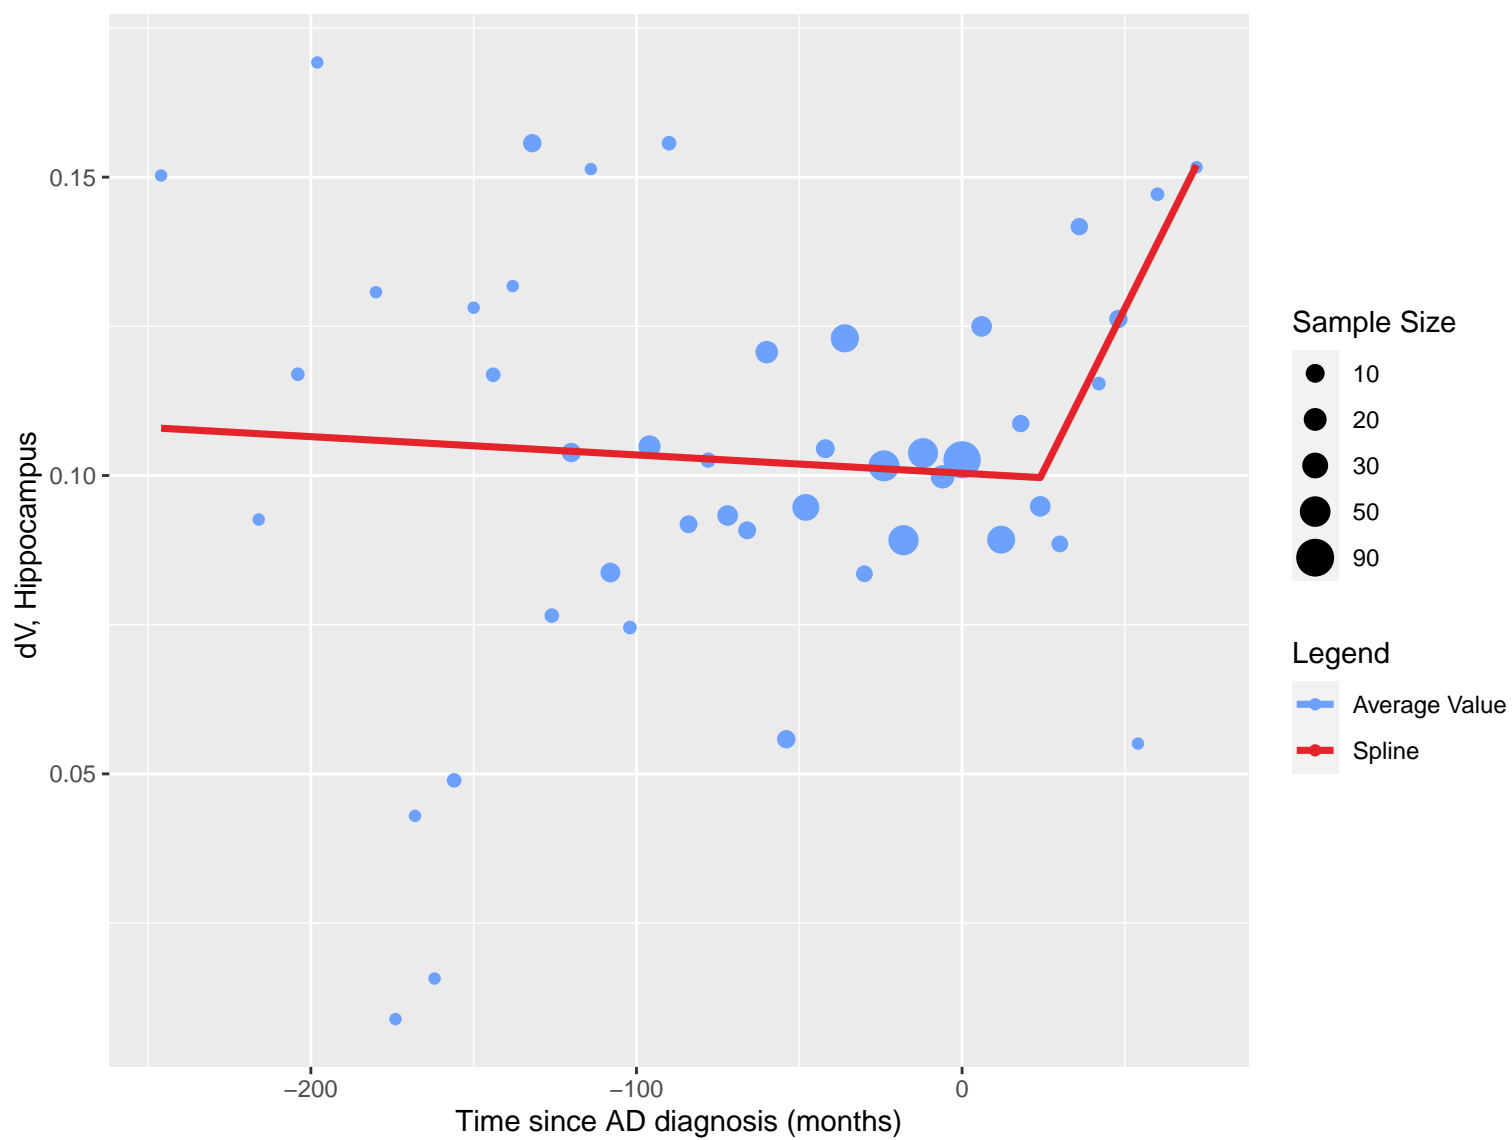

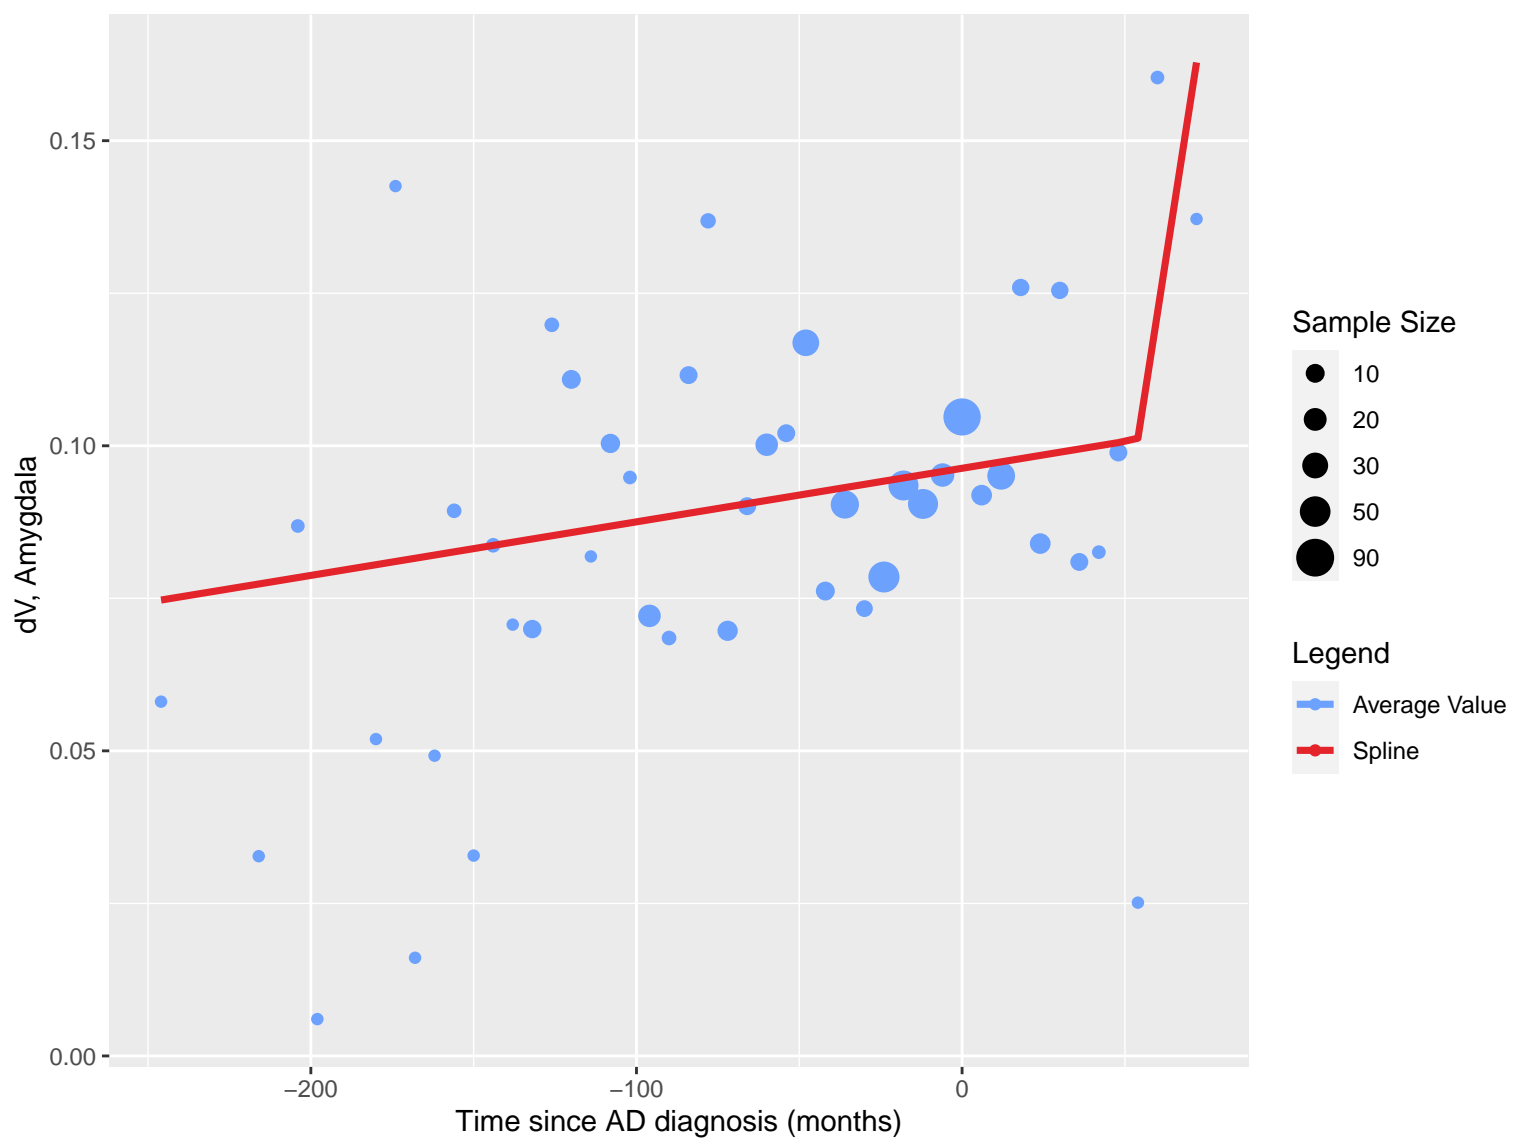



dV, Anterior temporal lobe, medial part

0.20

0.15

0.10

0.05

-200

-100

0

Time since AD diagnosis (months)

Sample Size

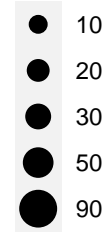

Legend

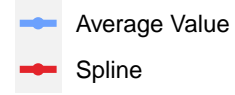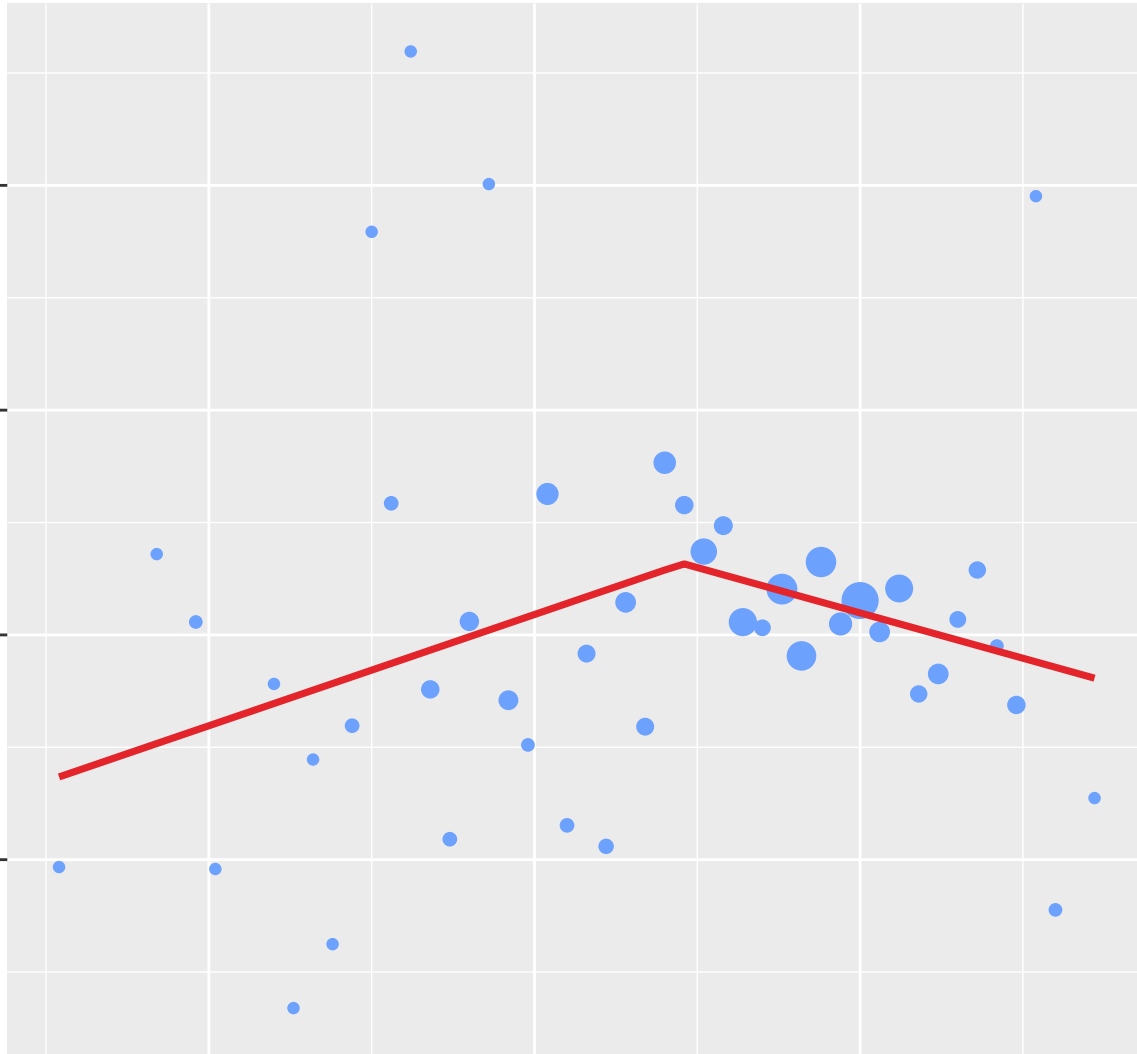

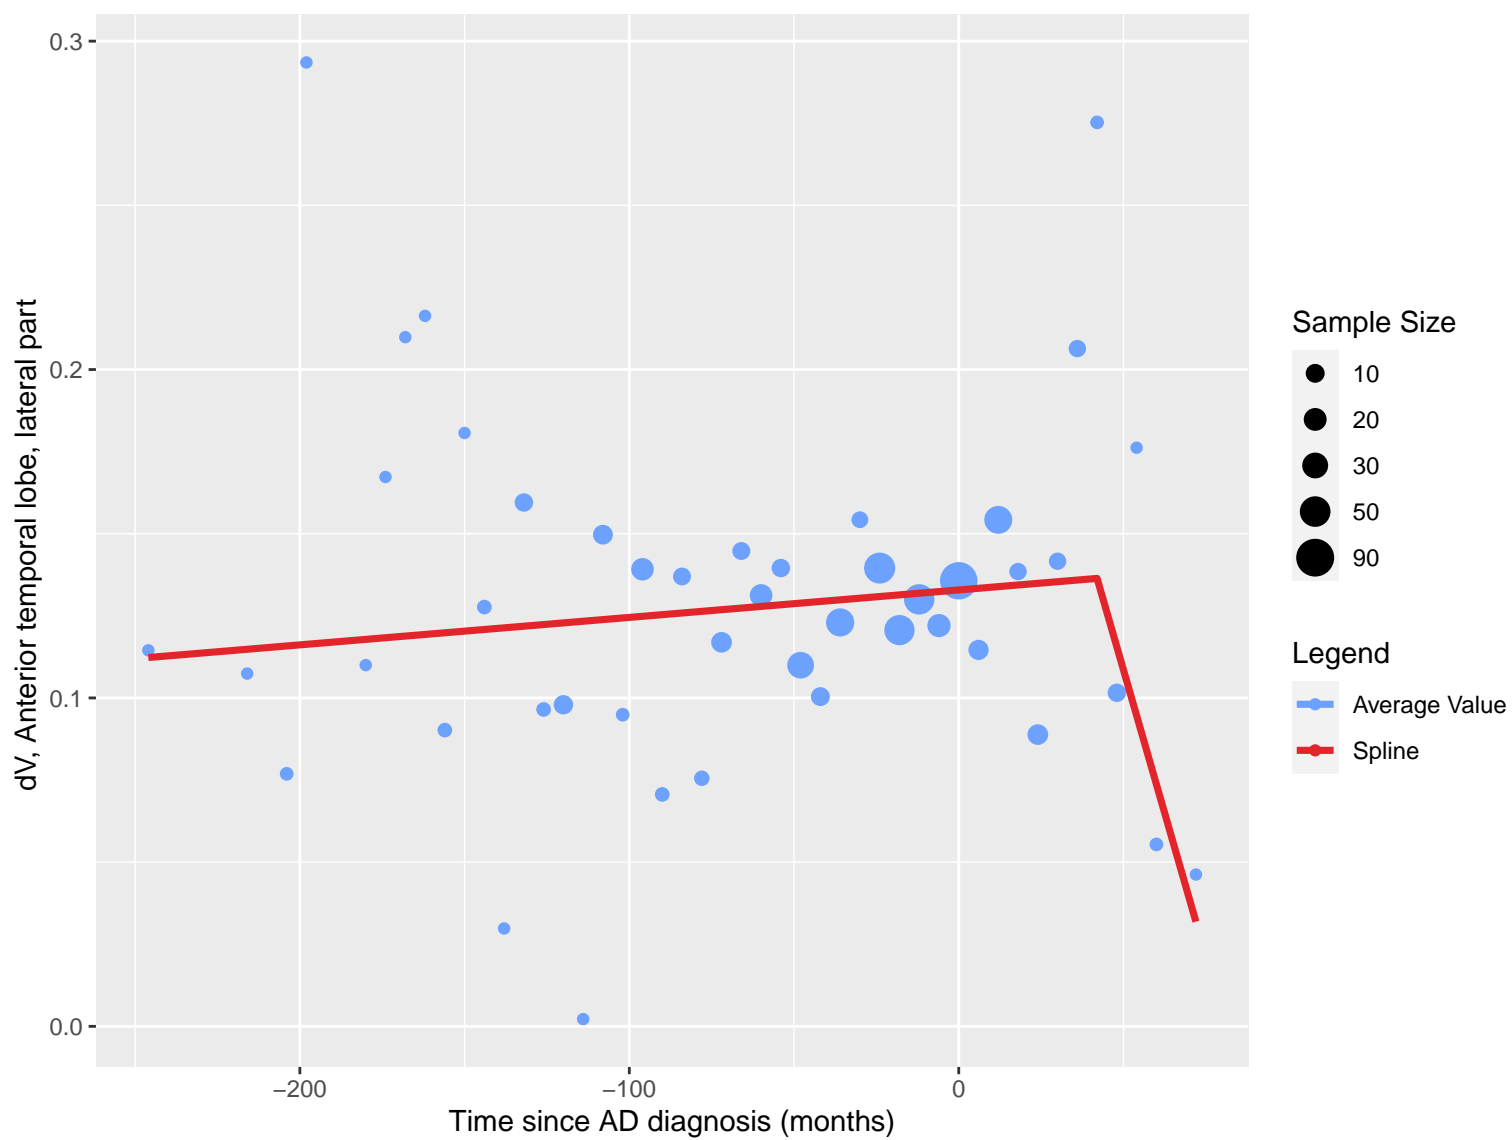

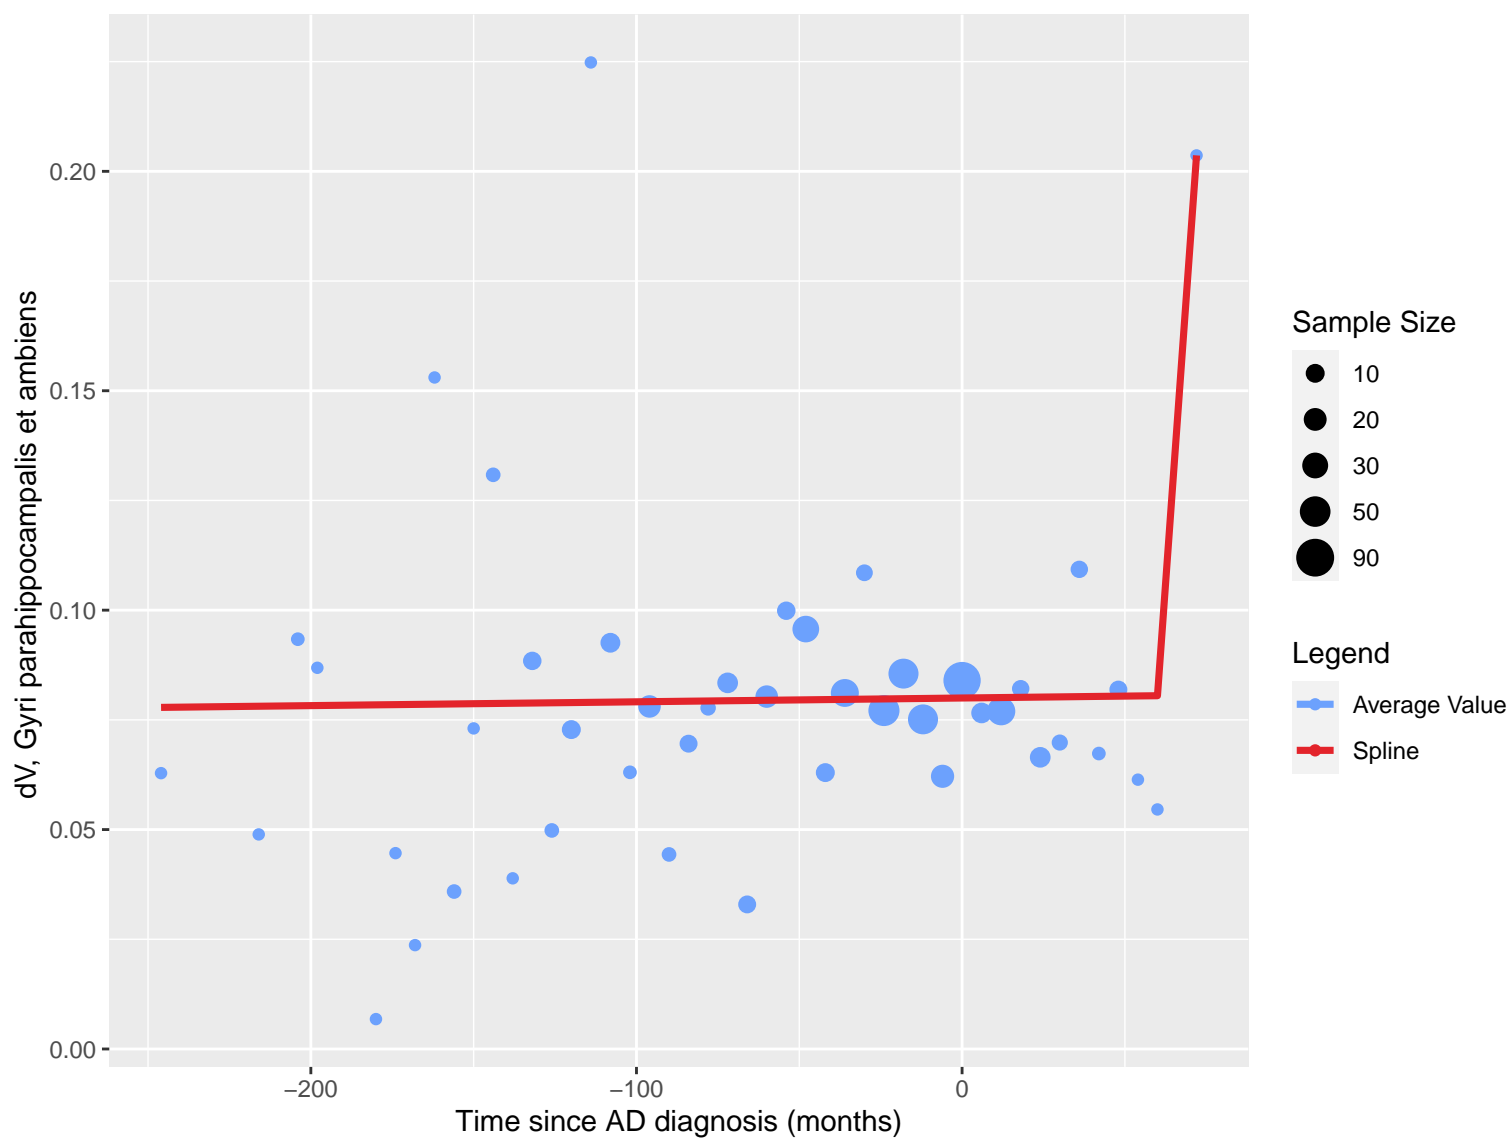

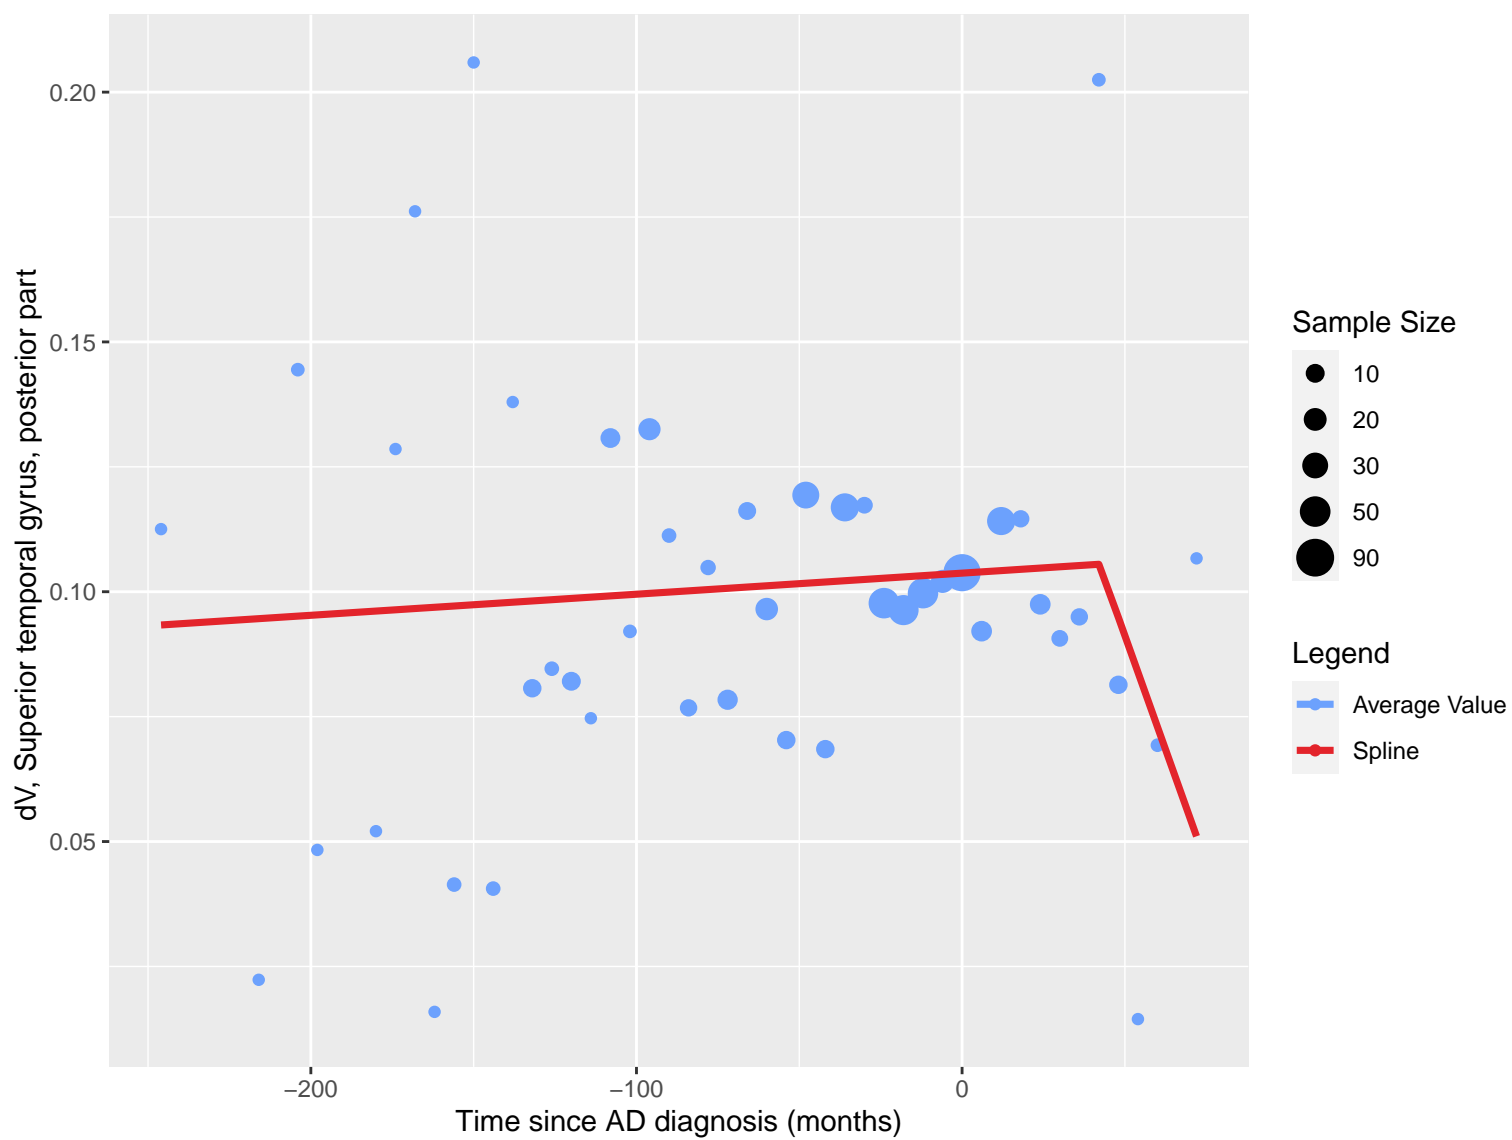

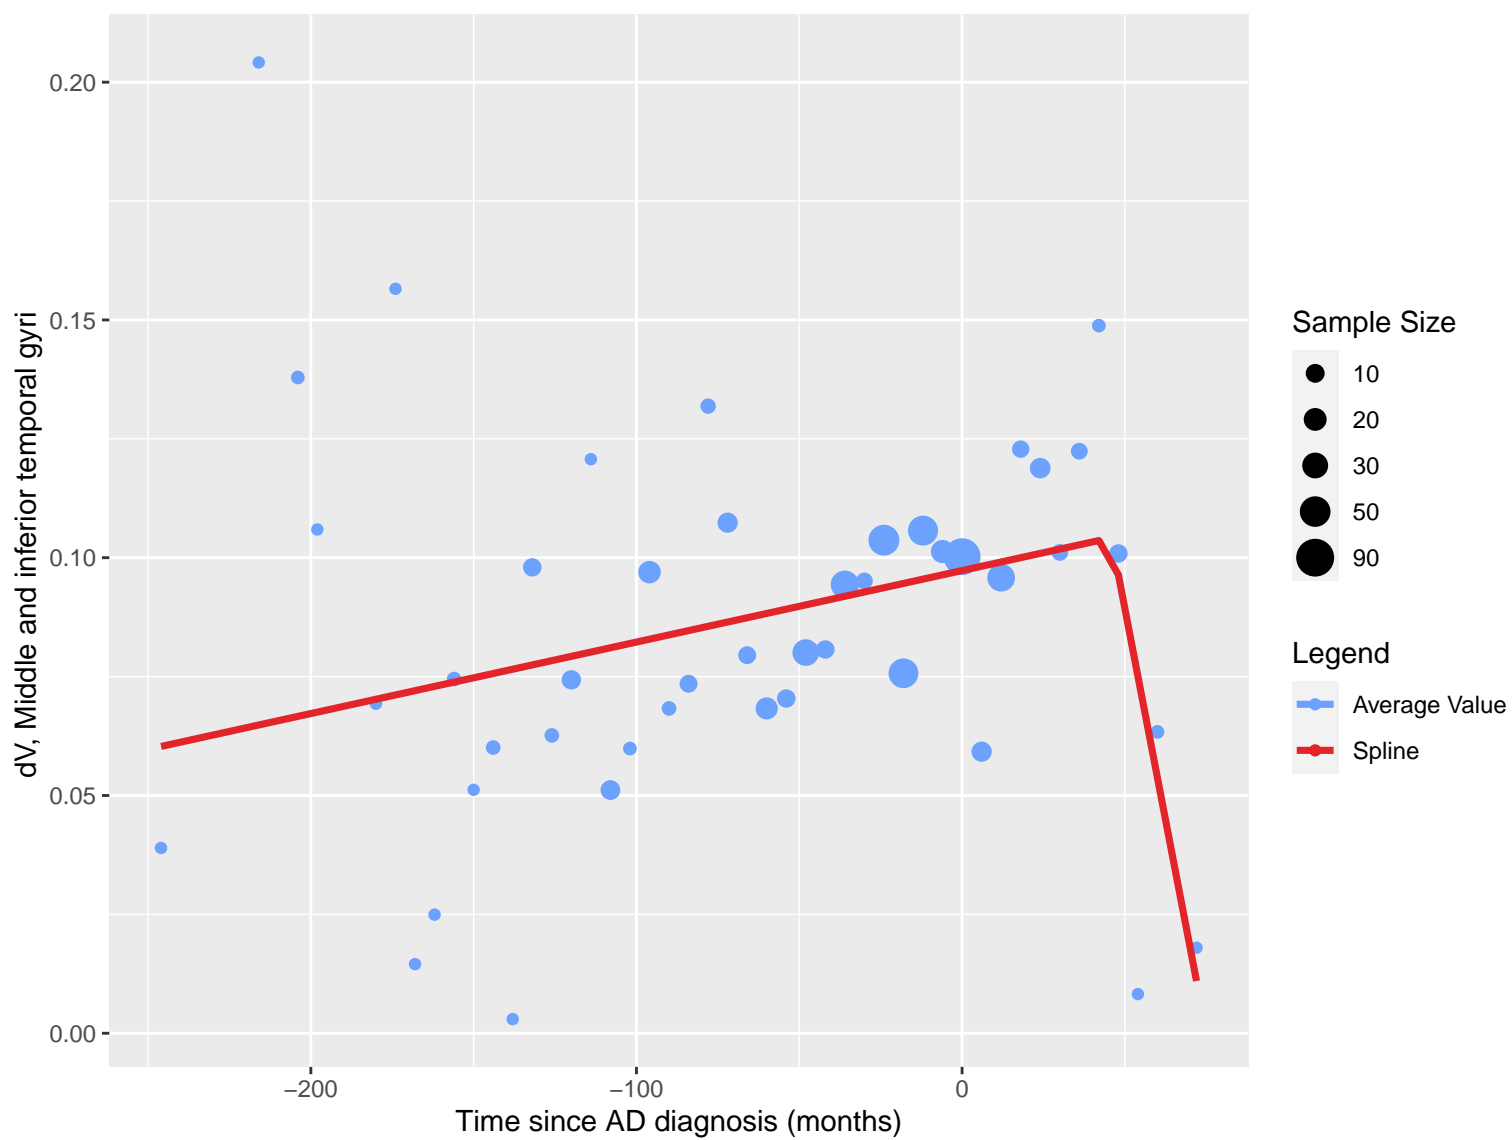

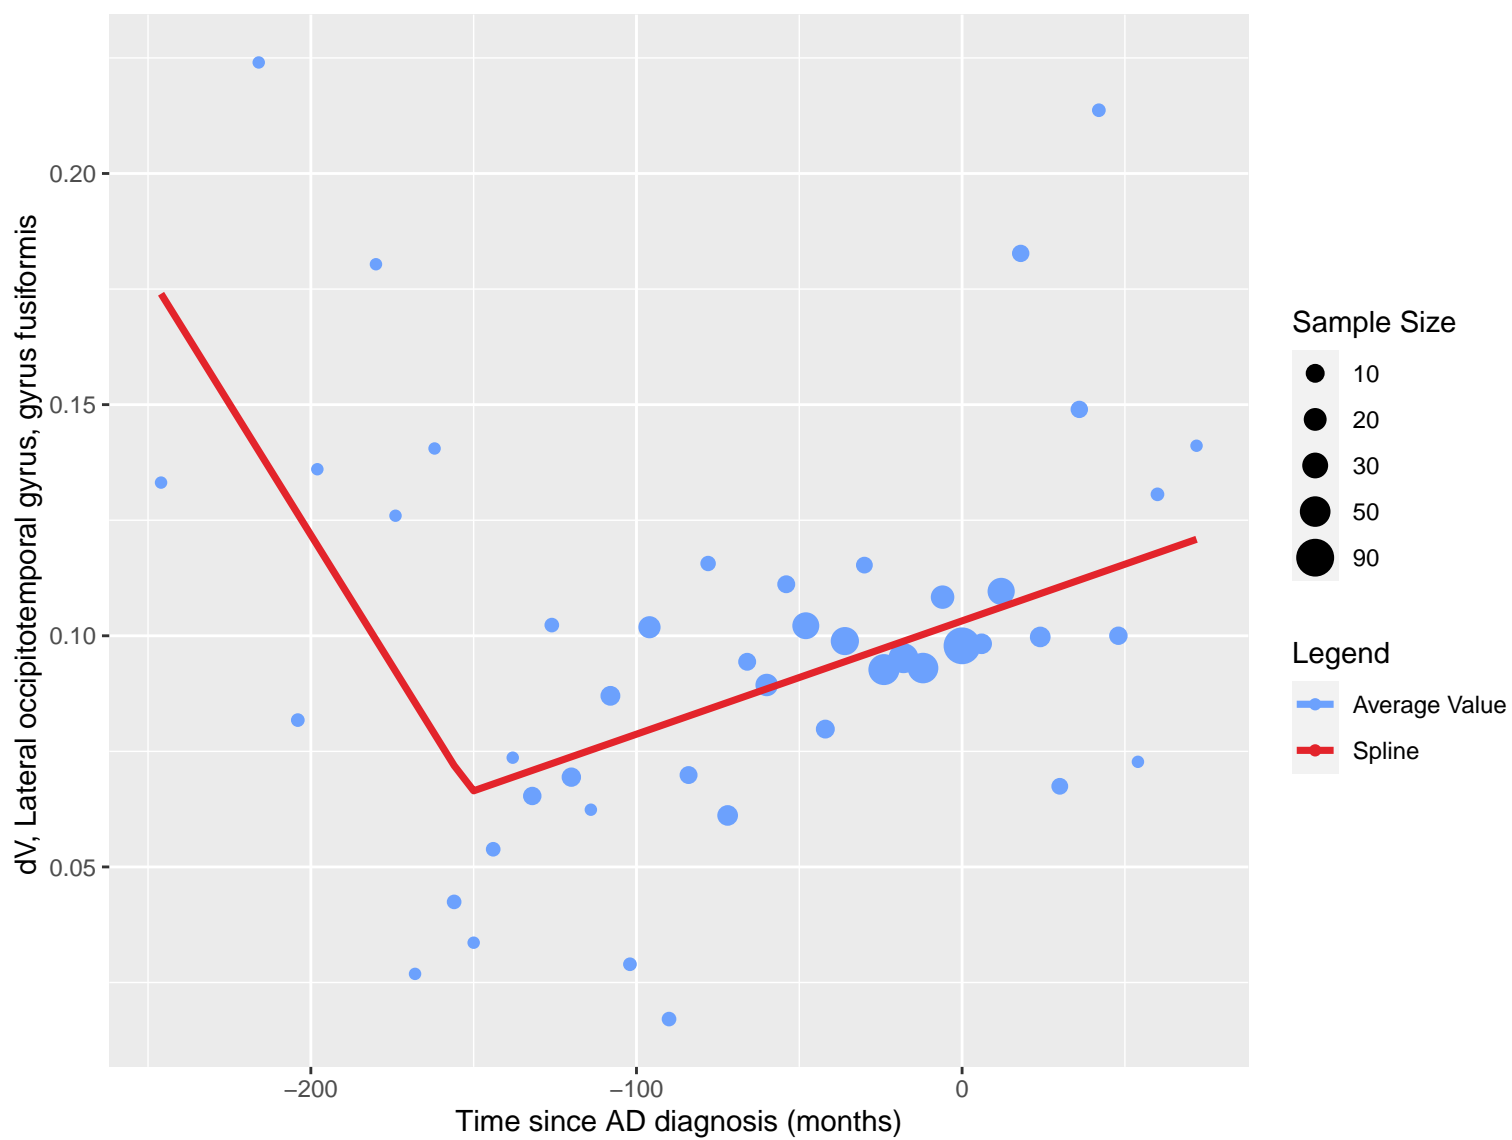

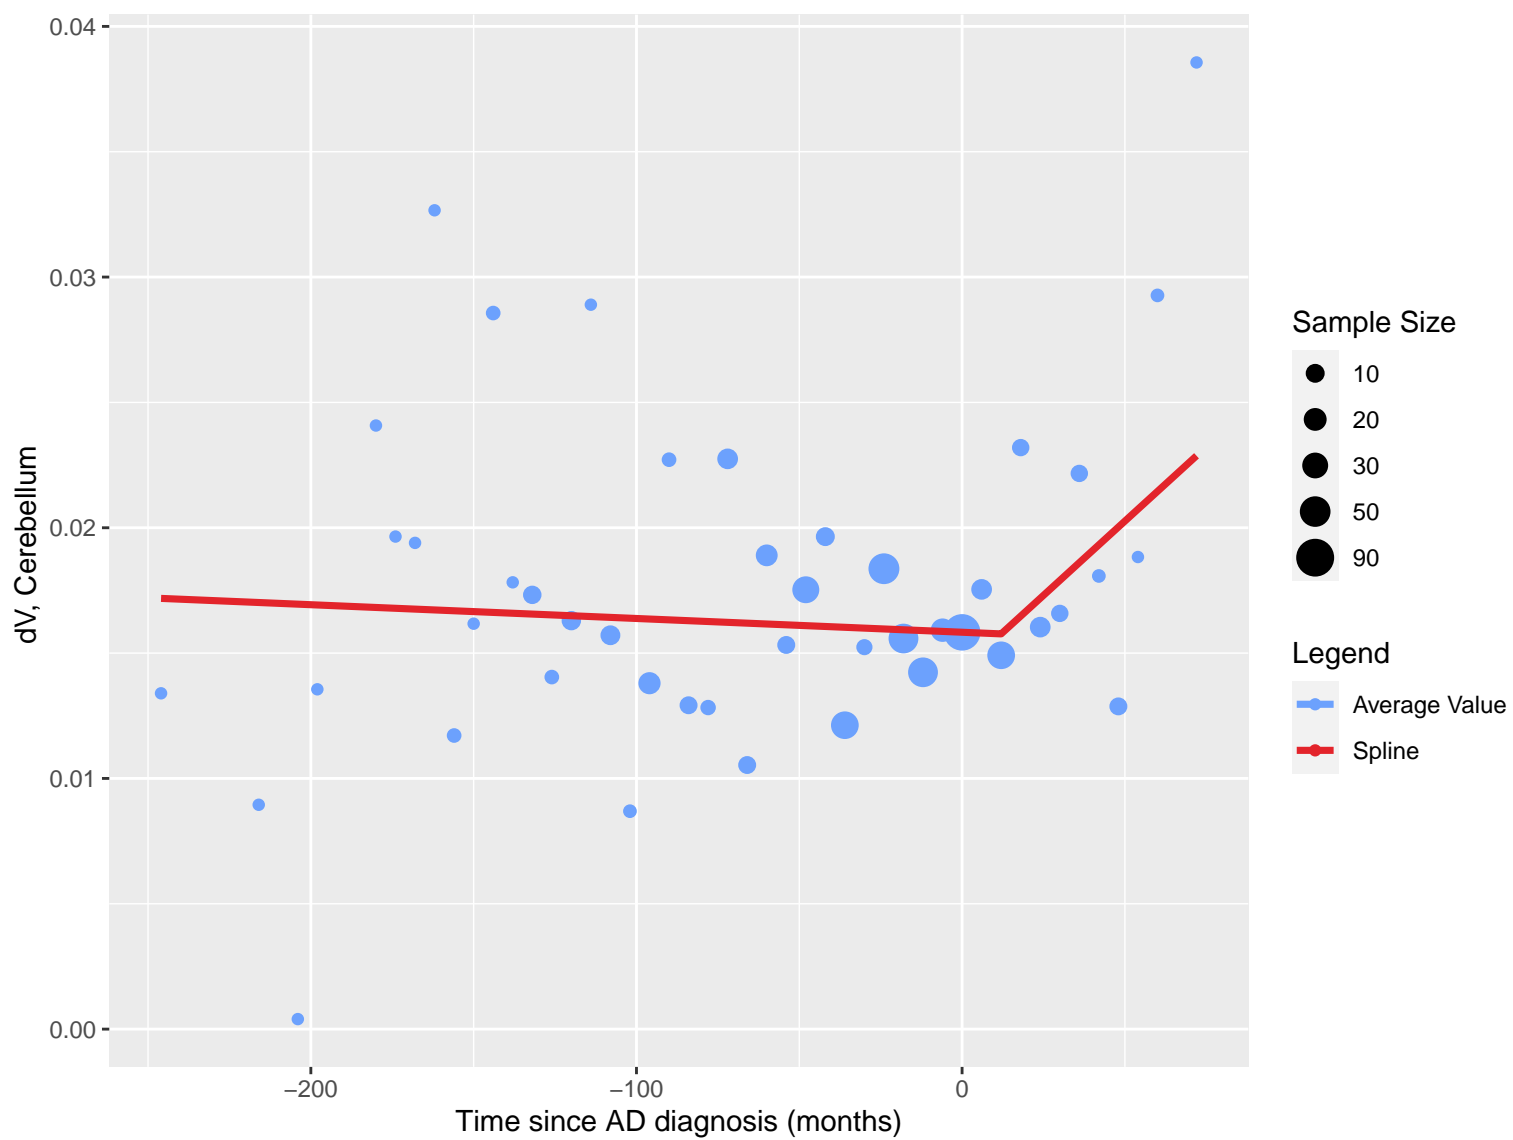

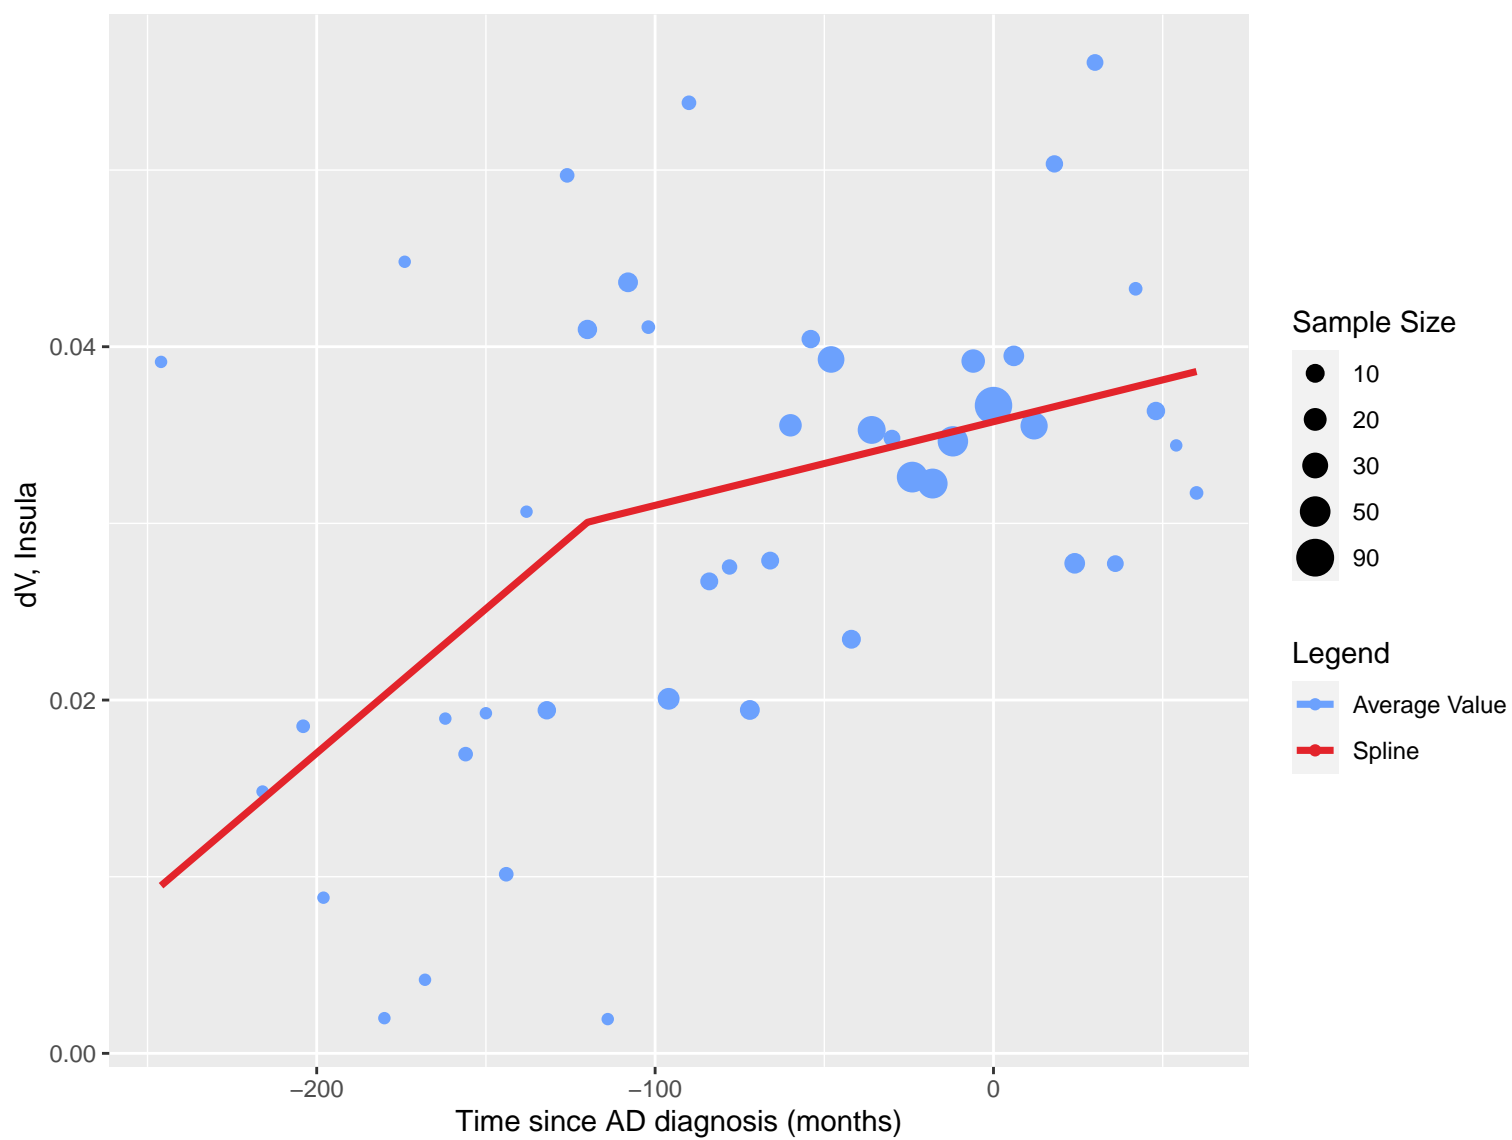



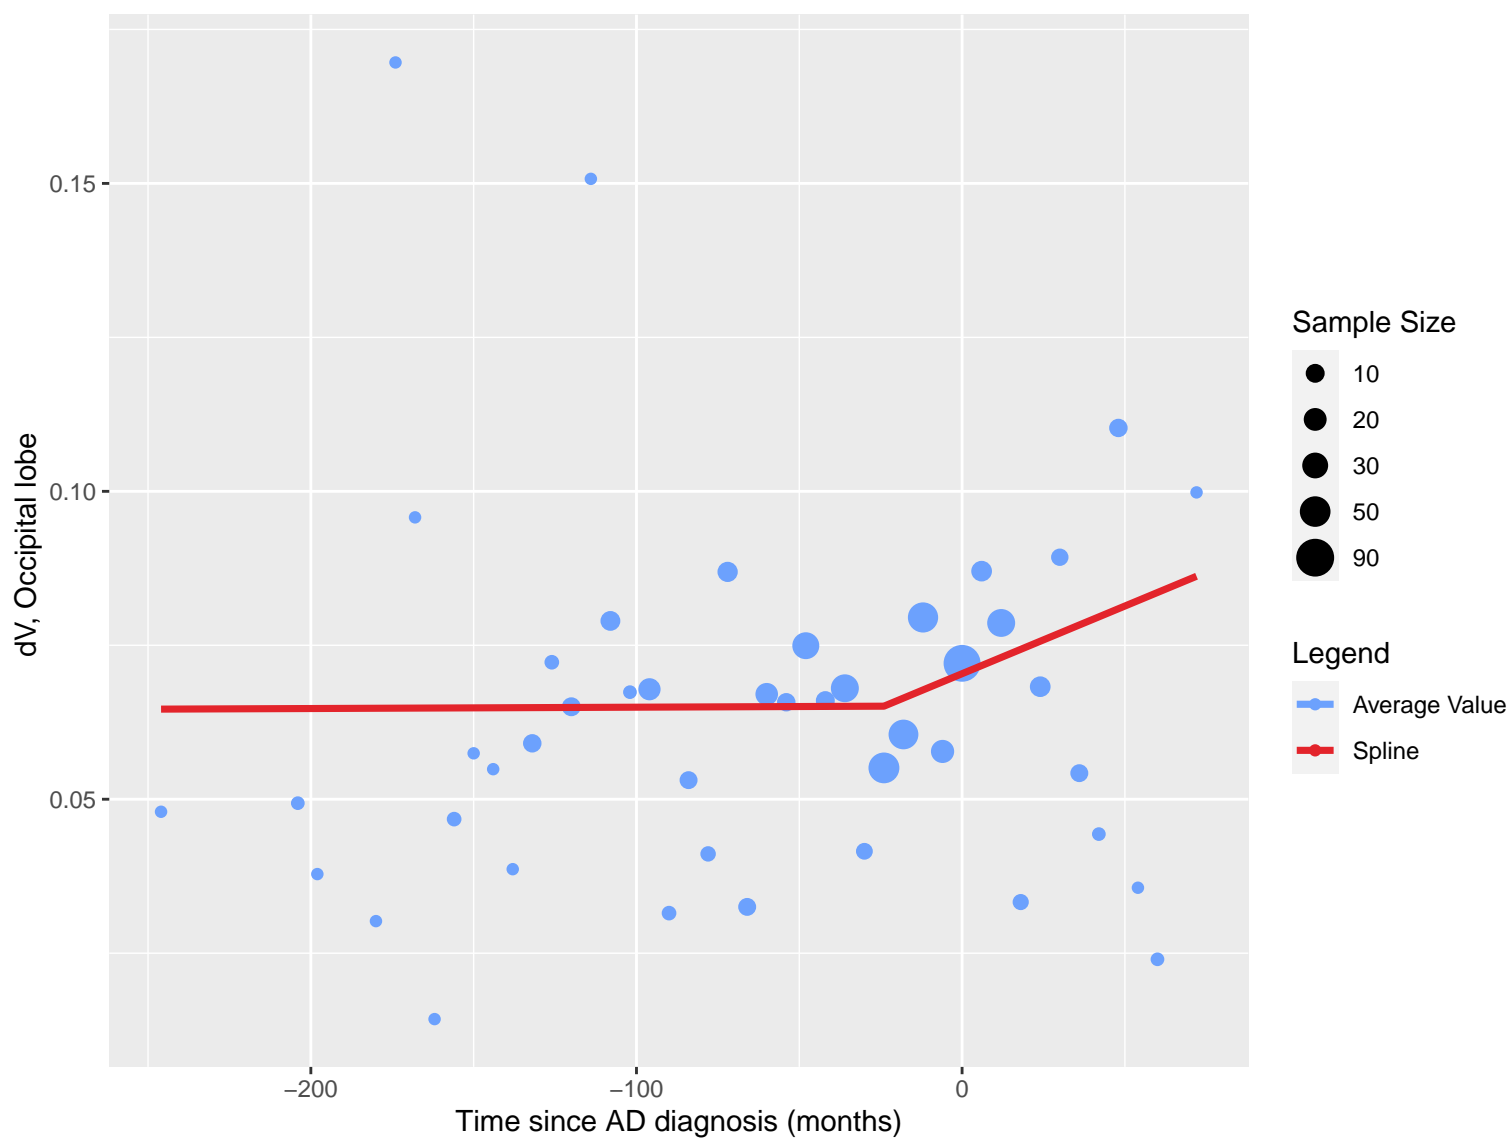

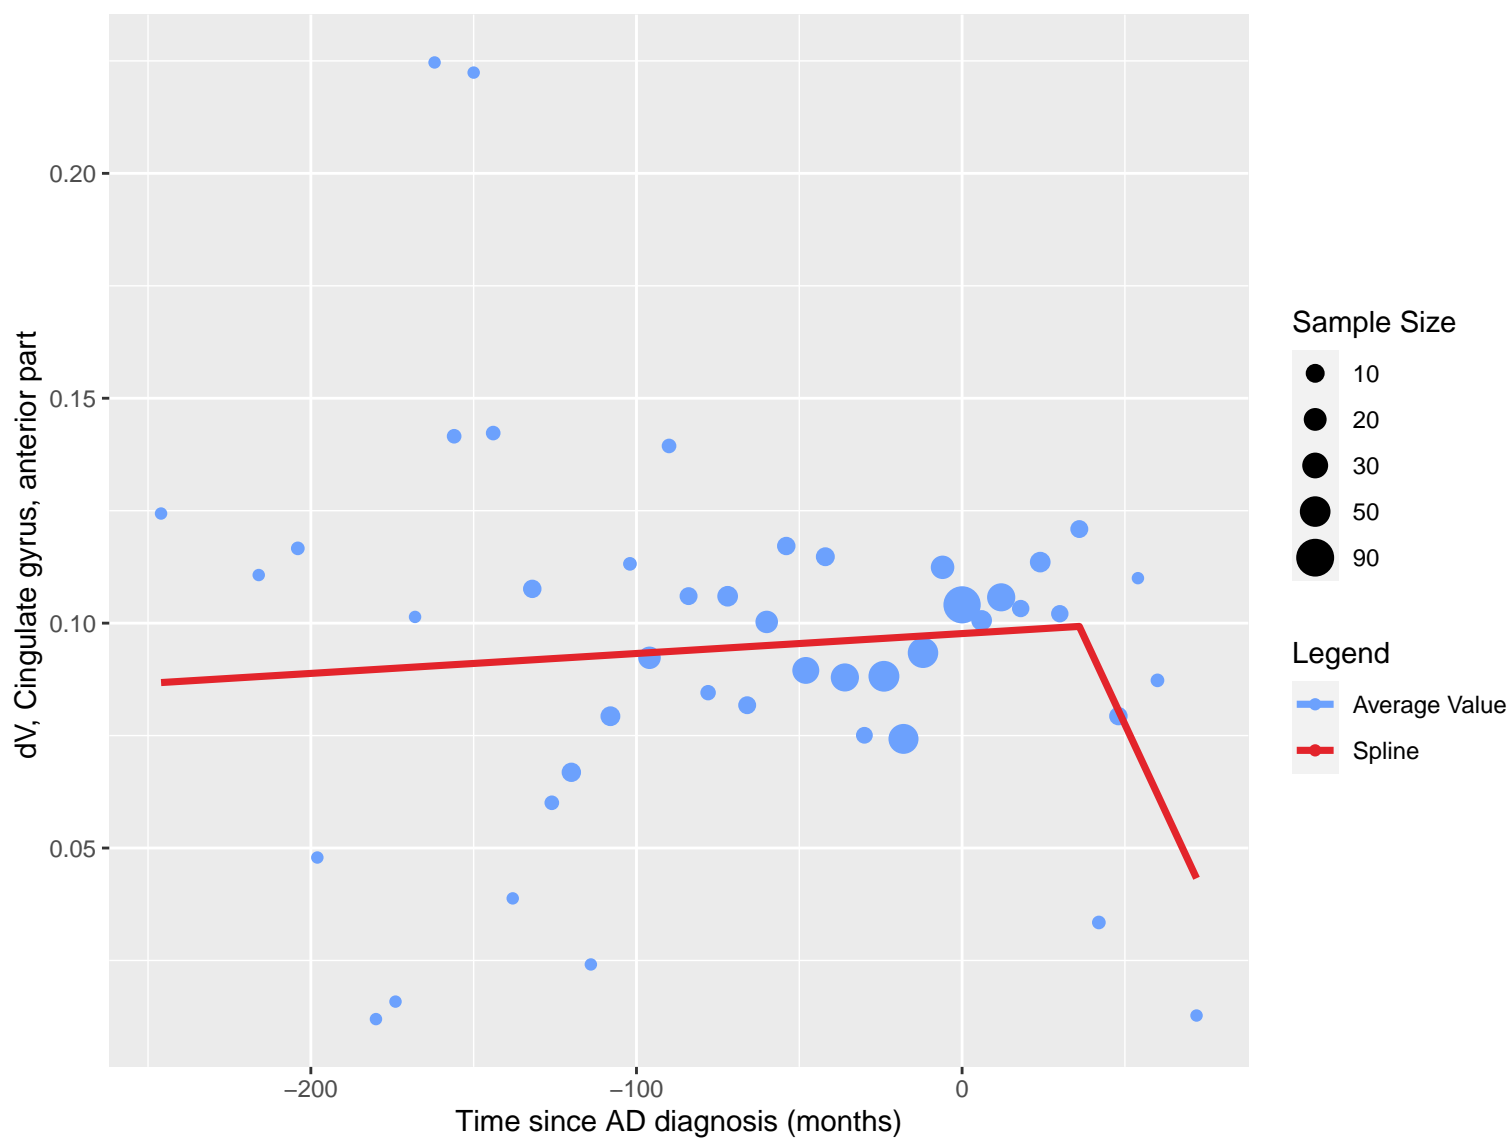

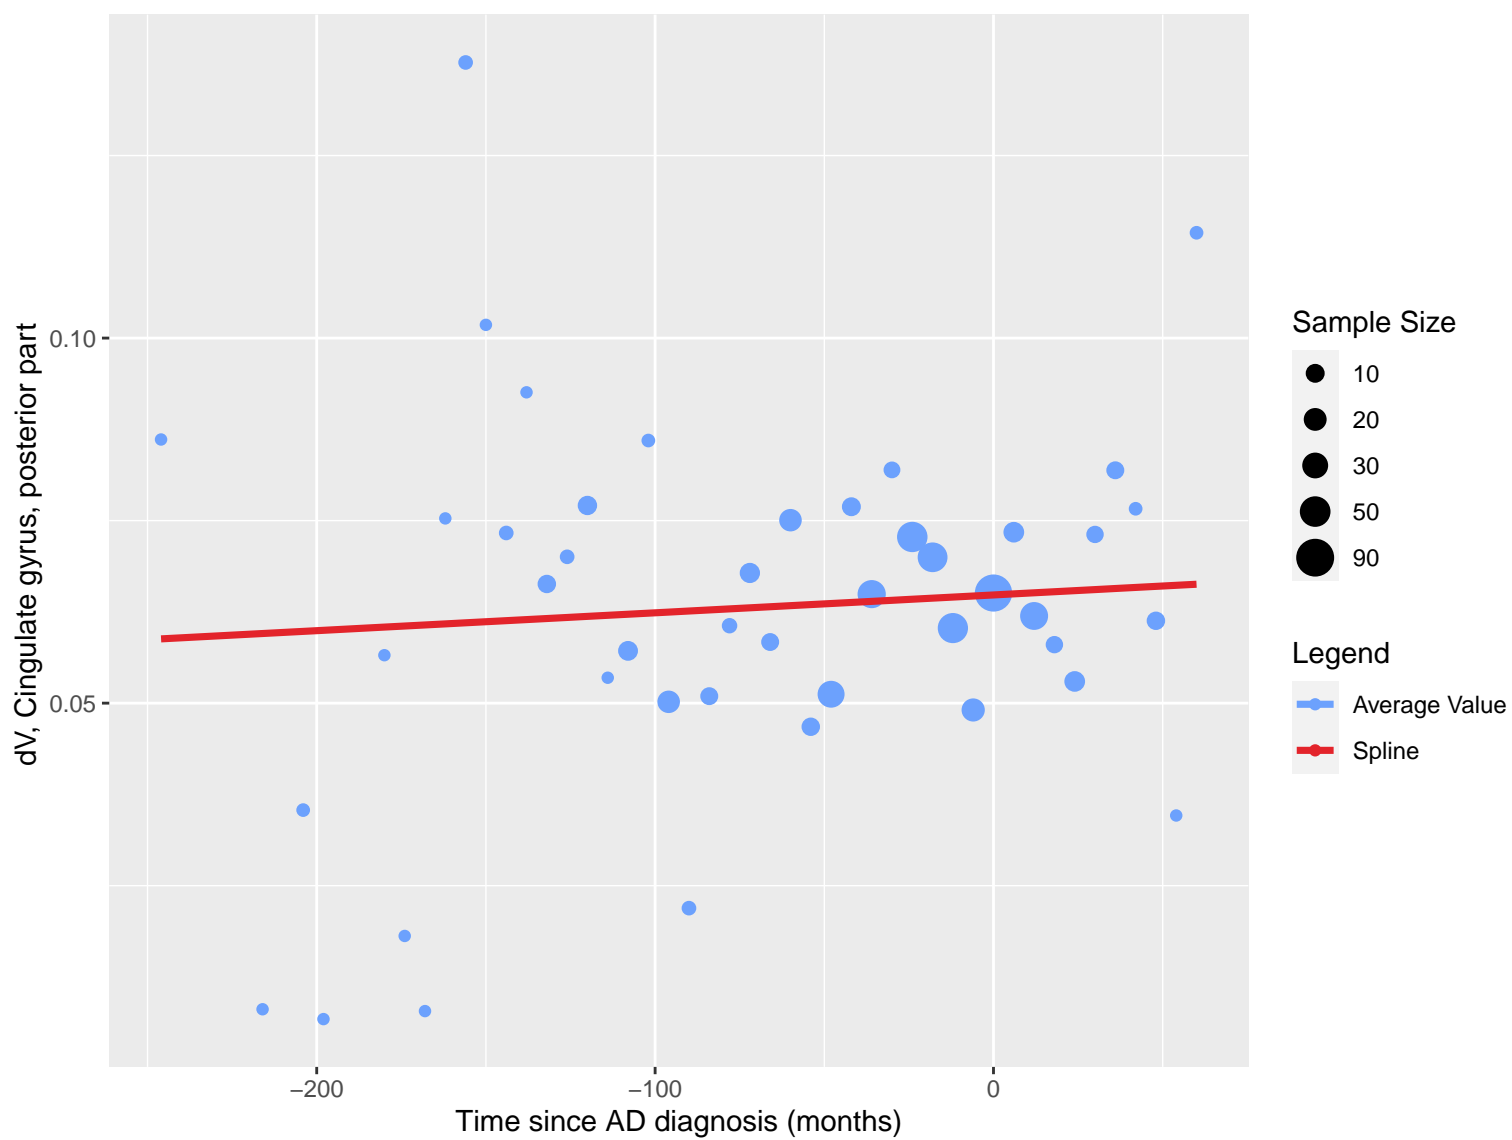

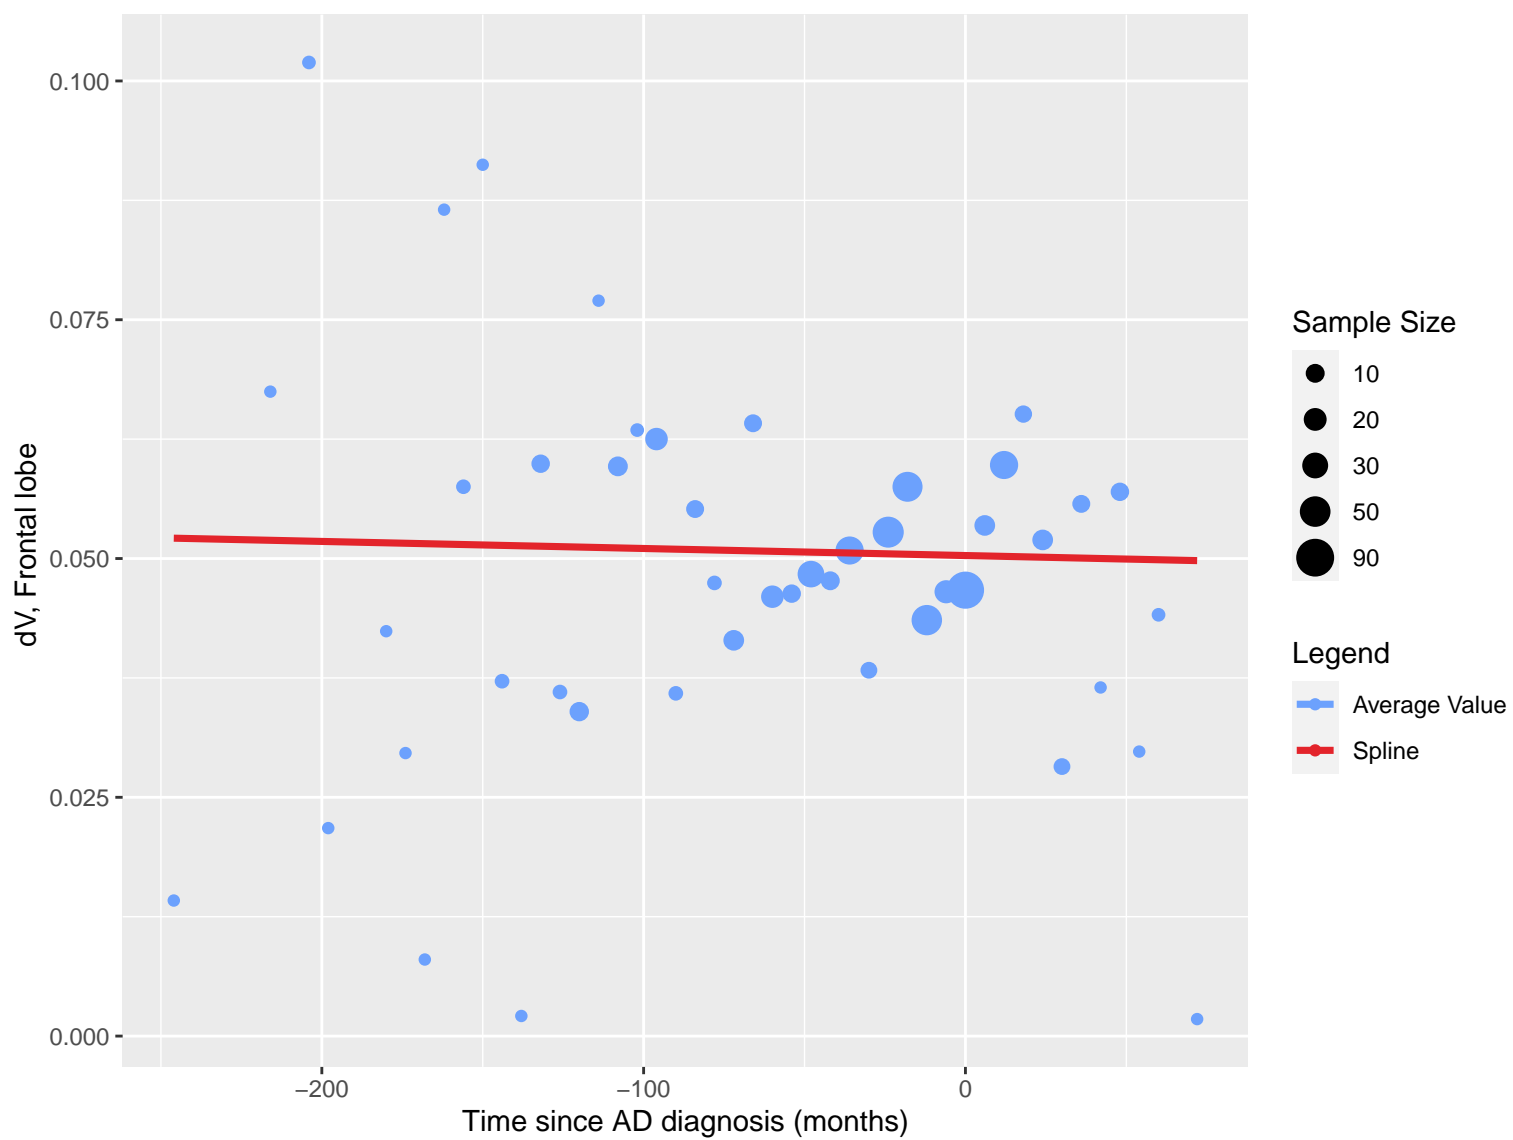

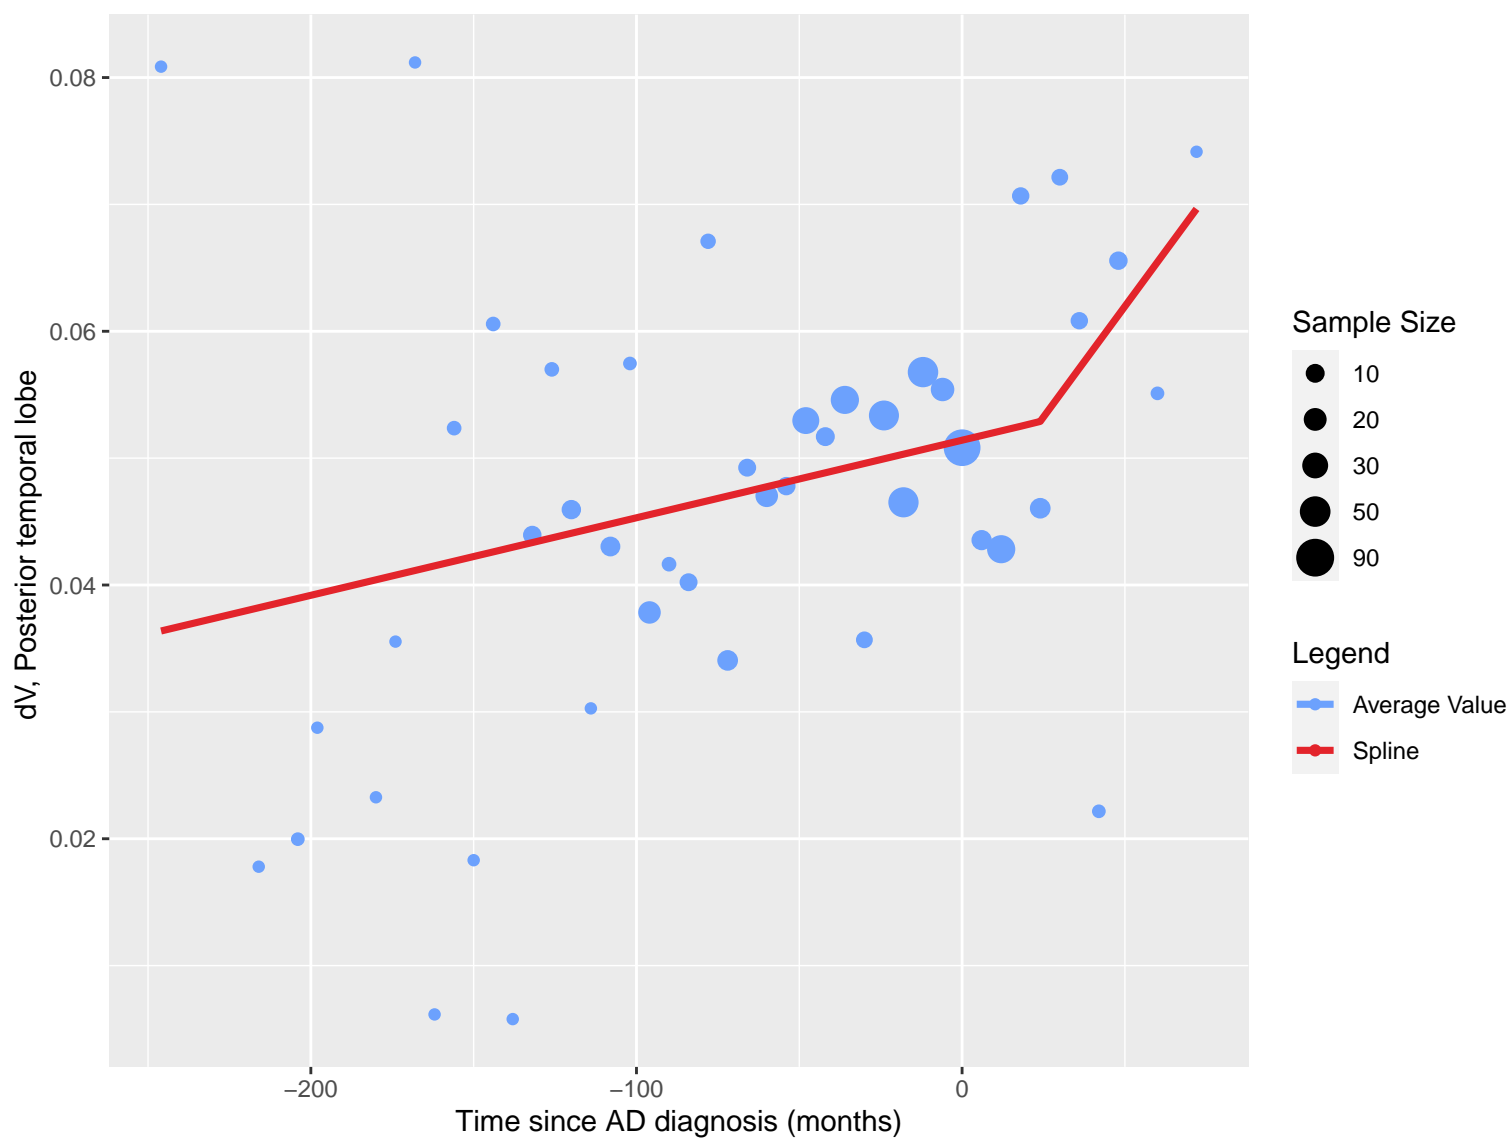

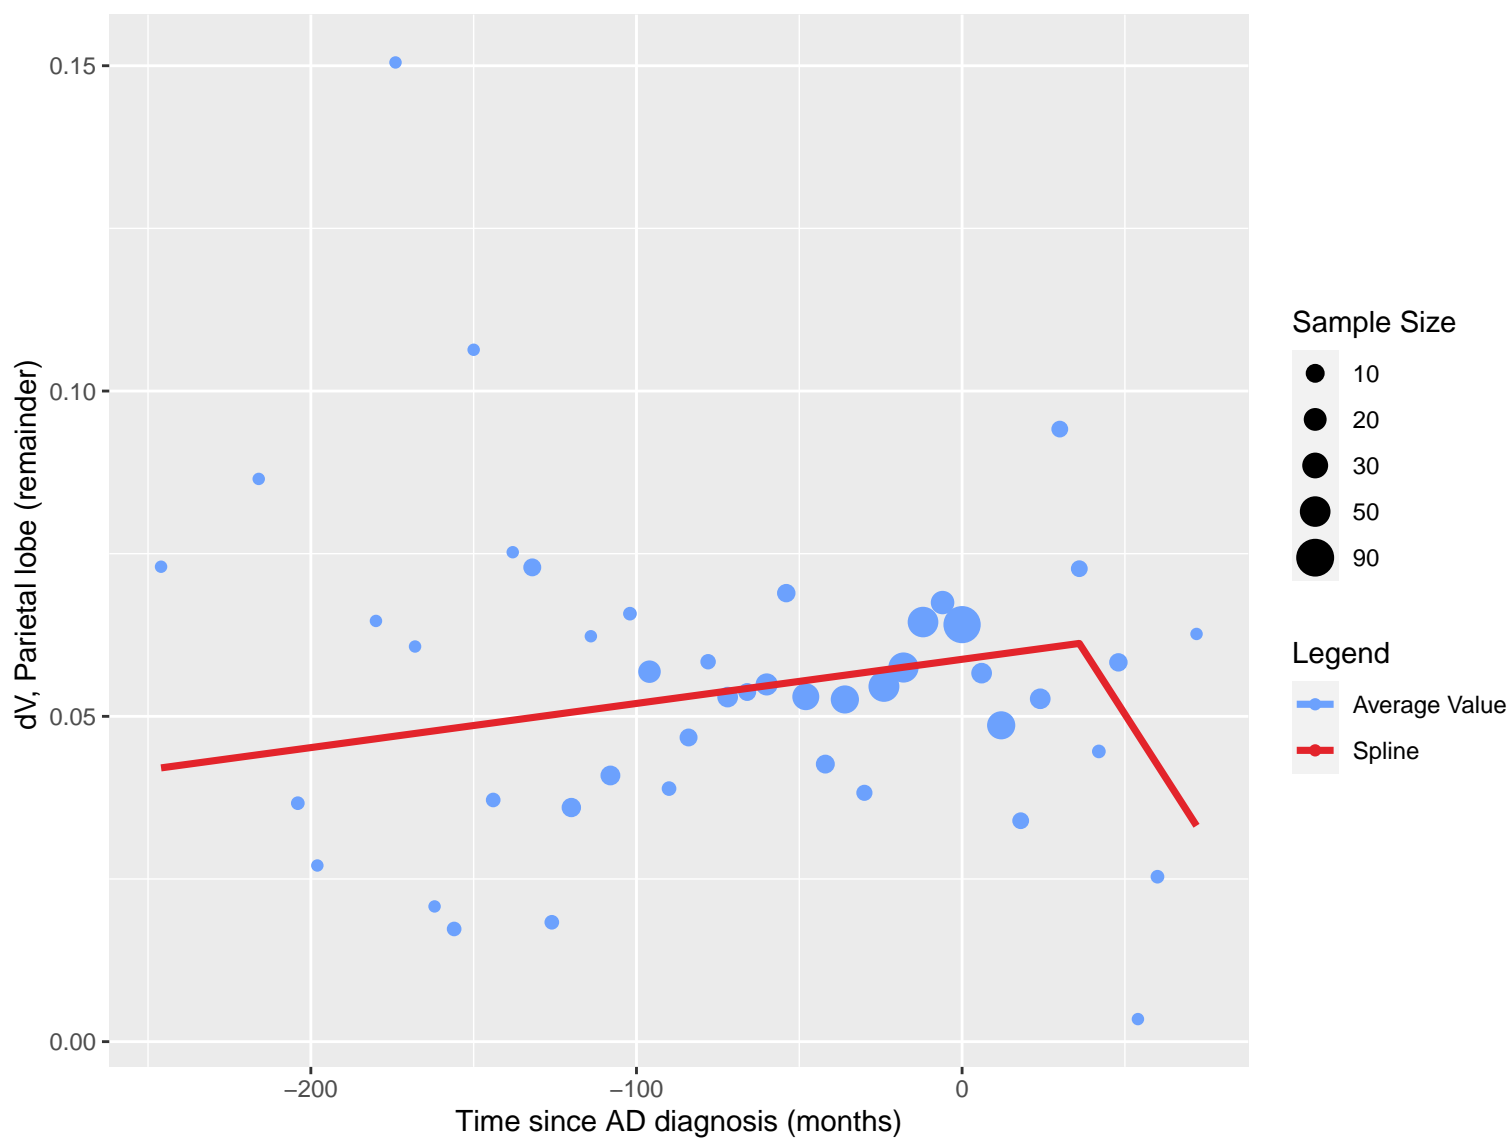

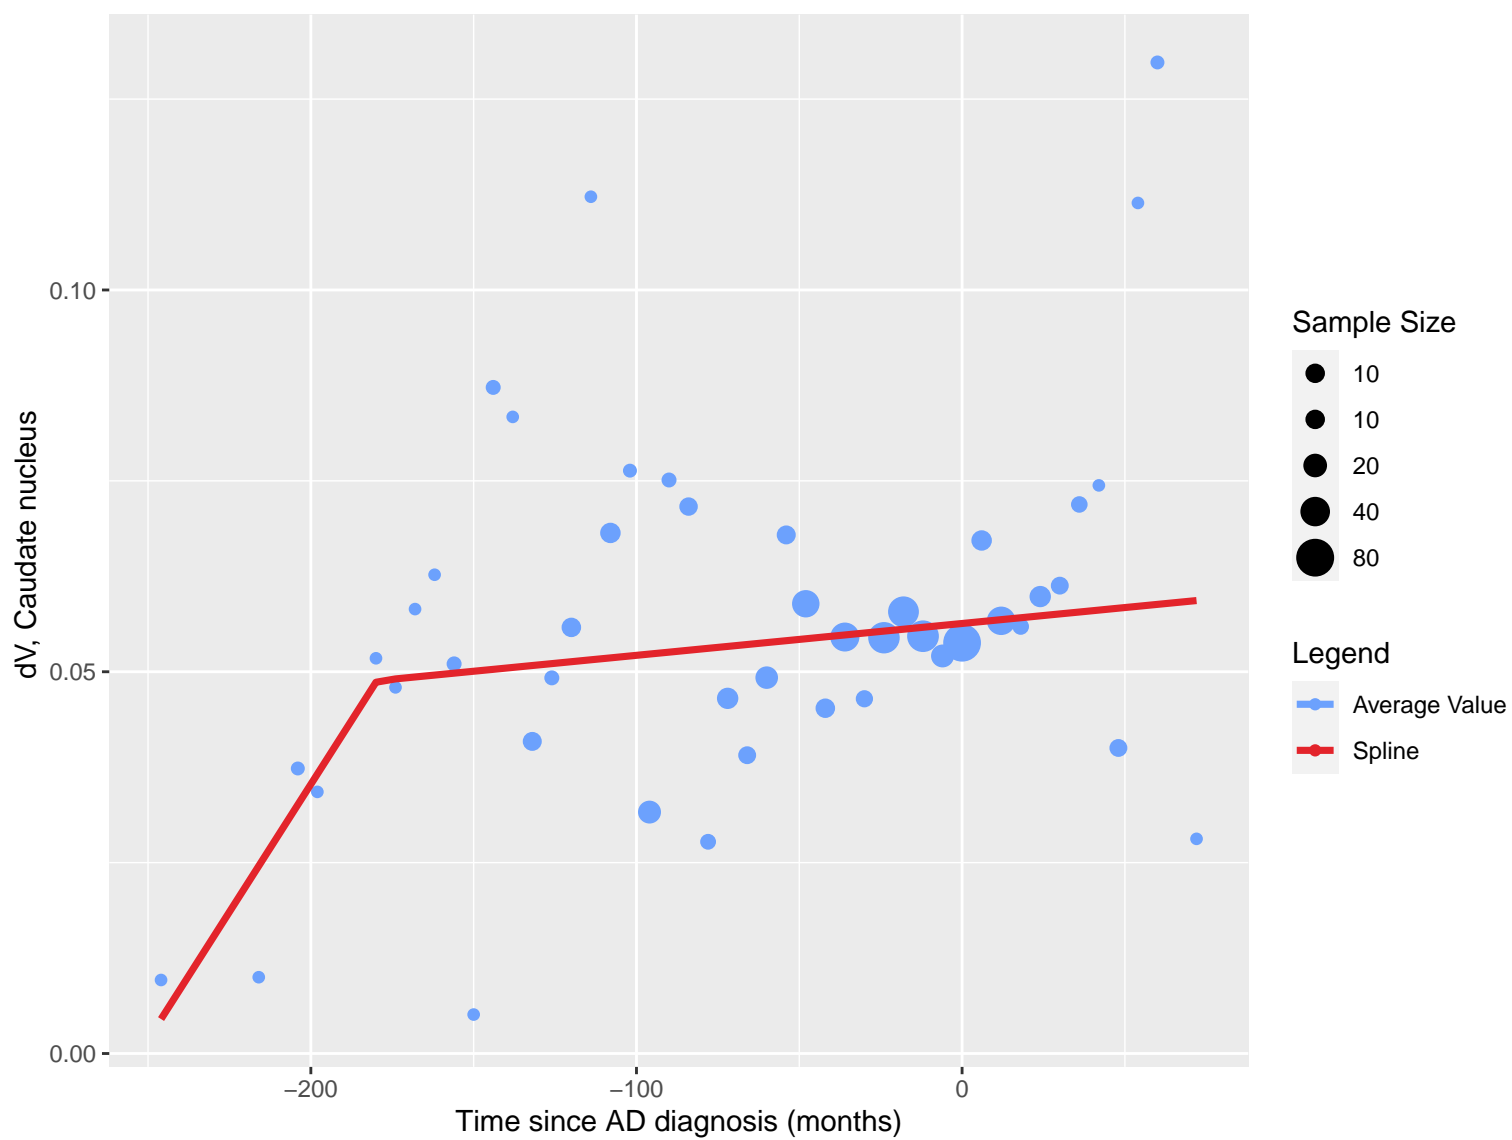

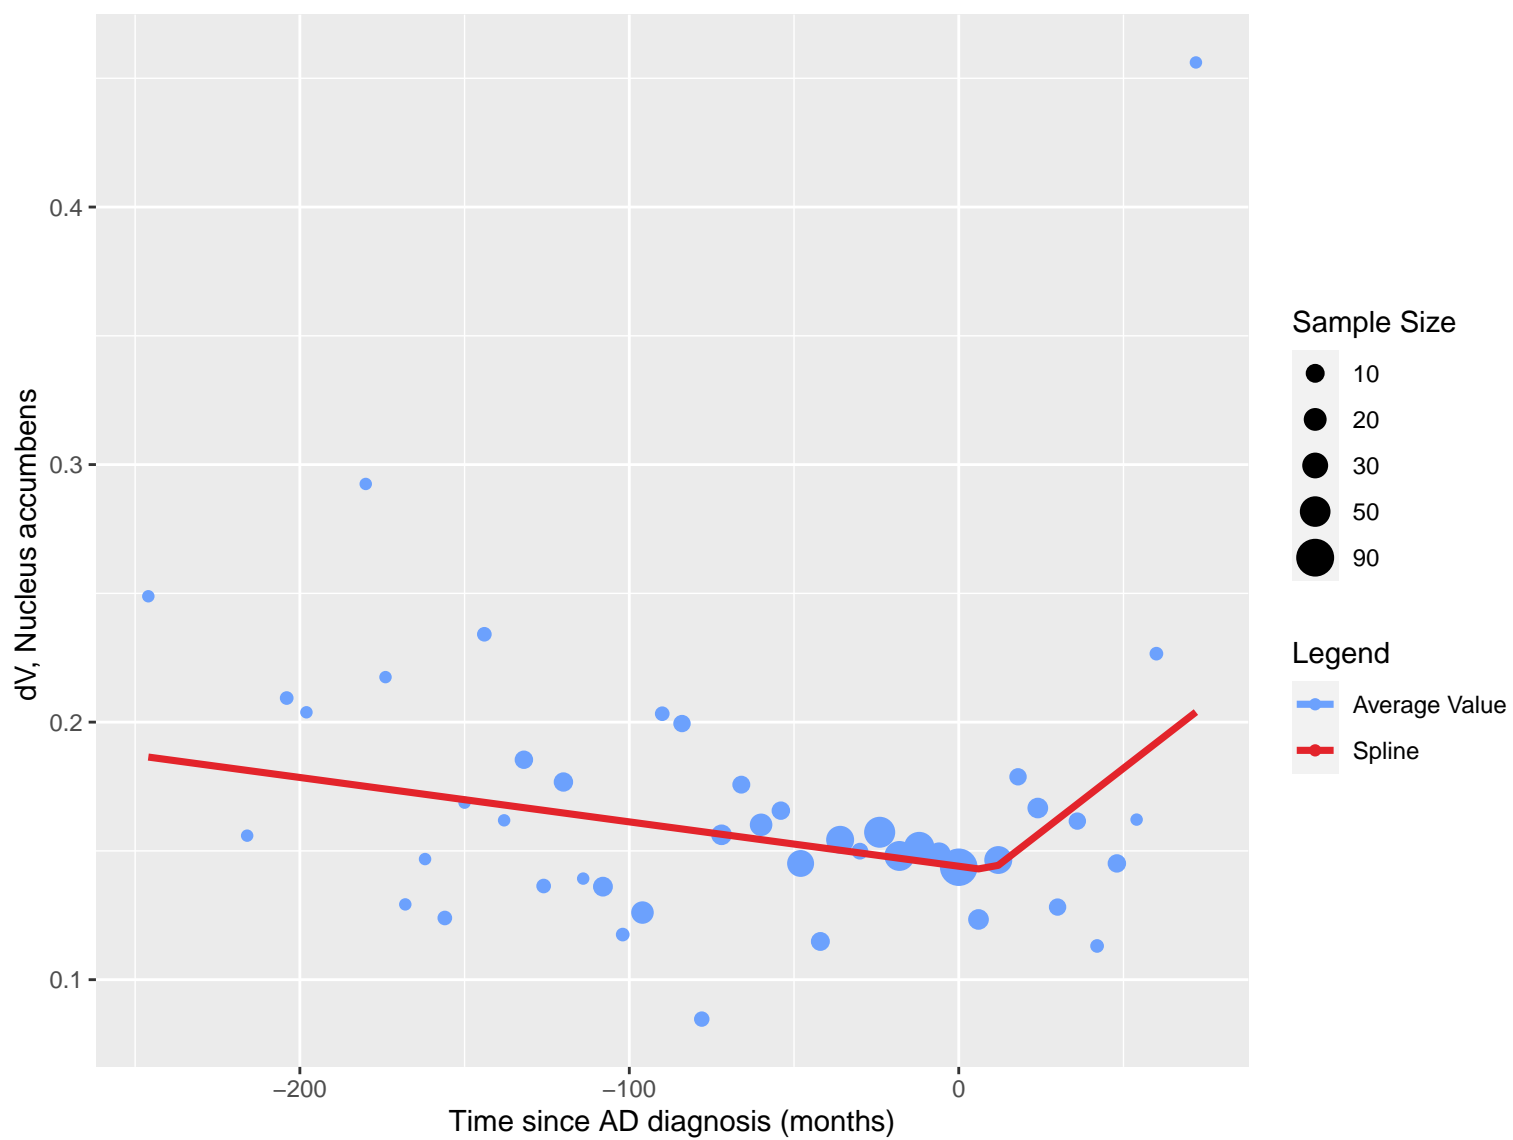



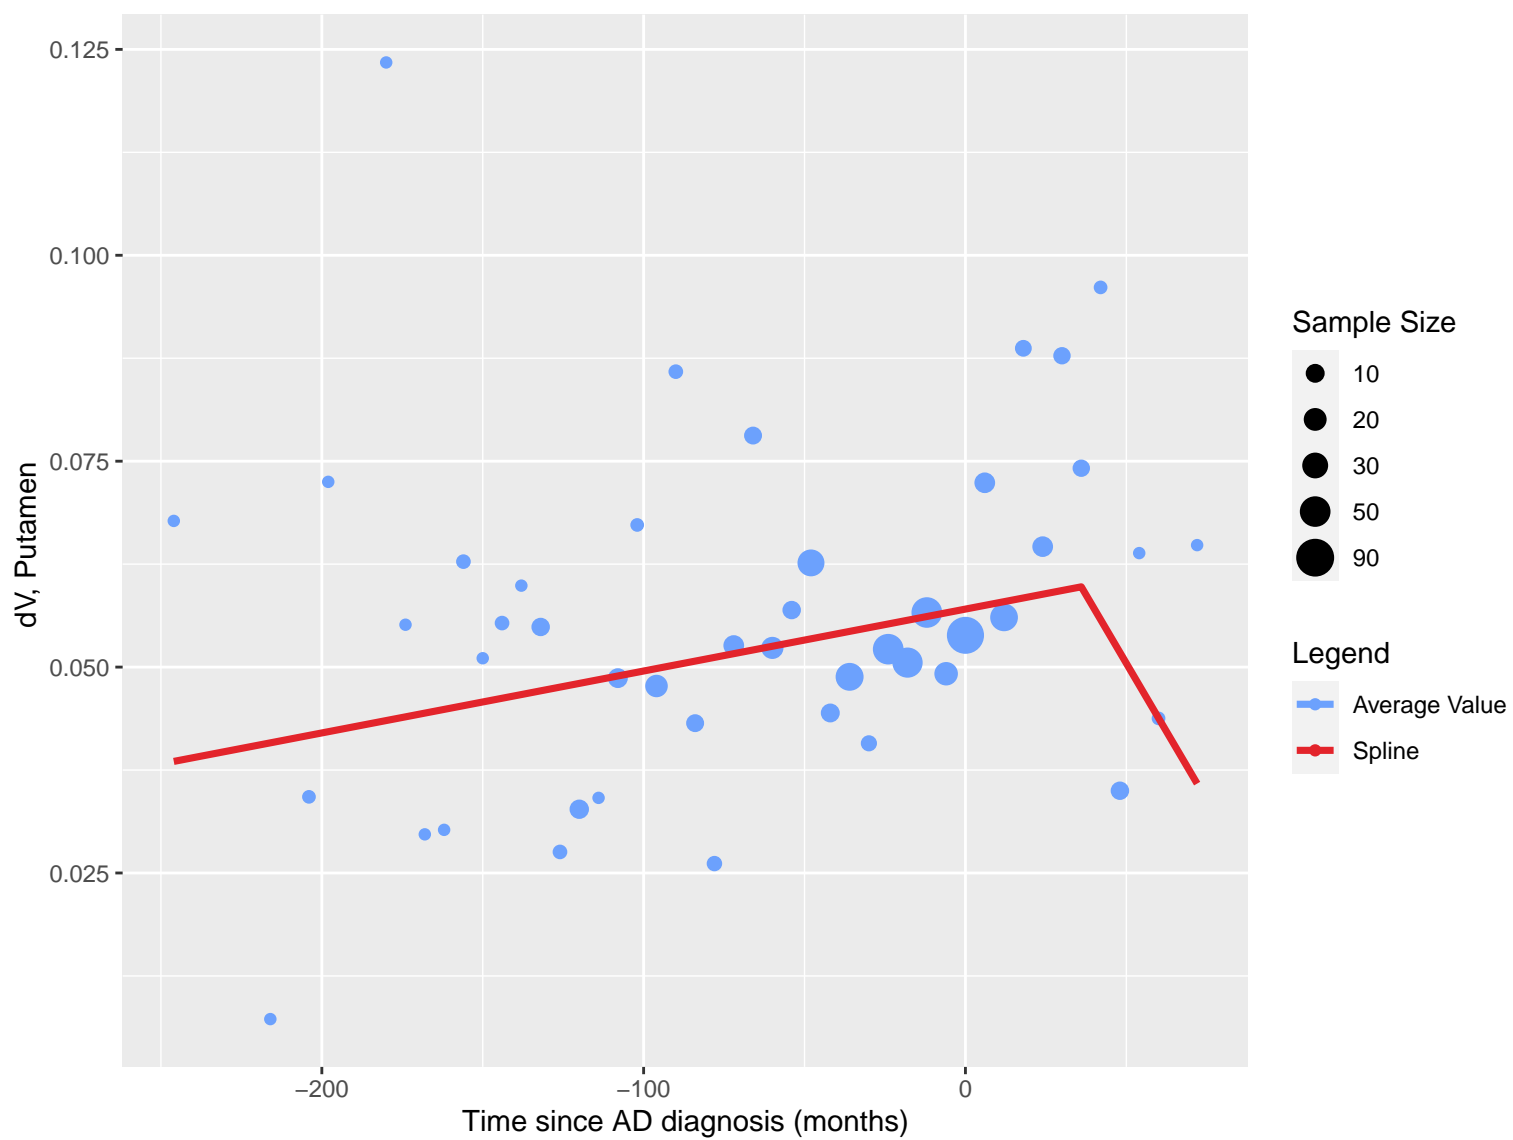

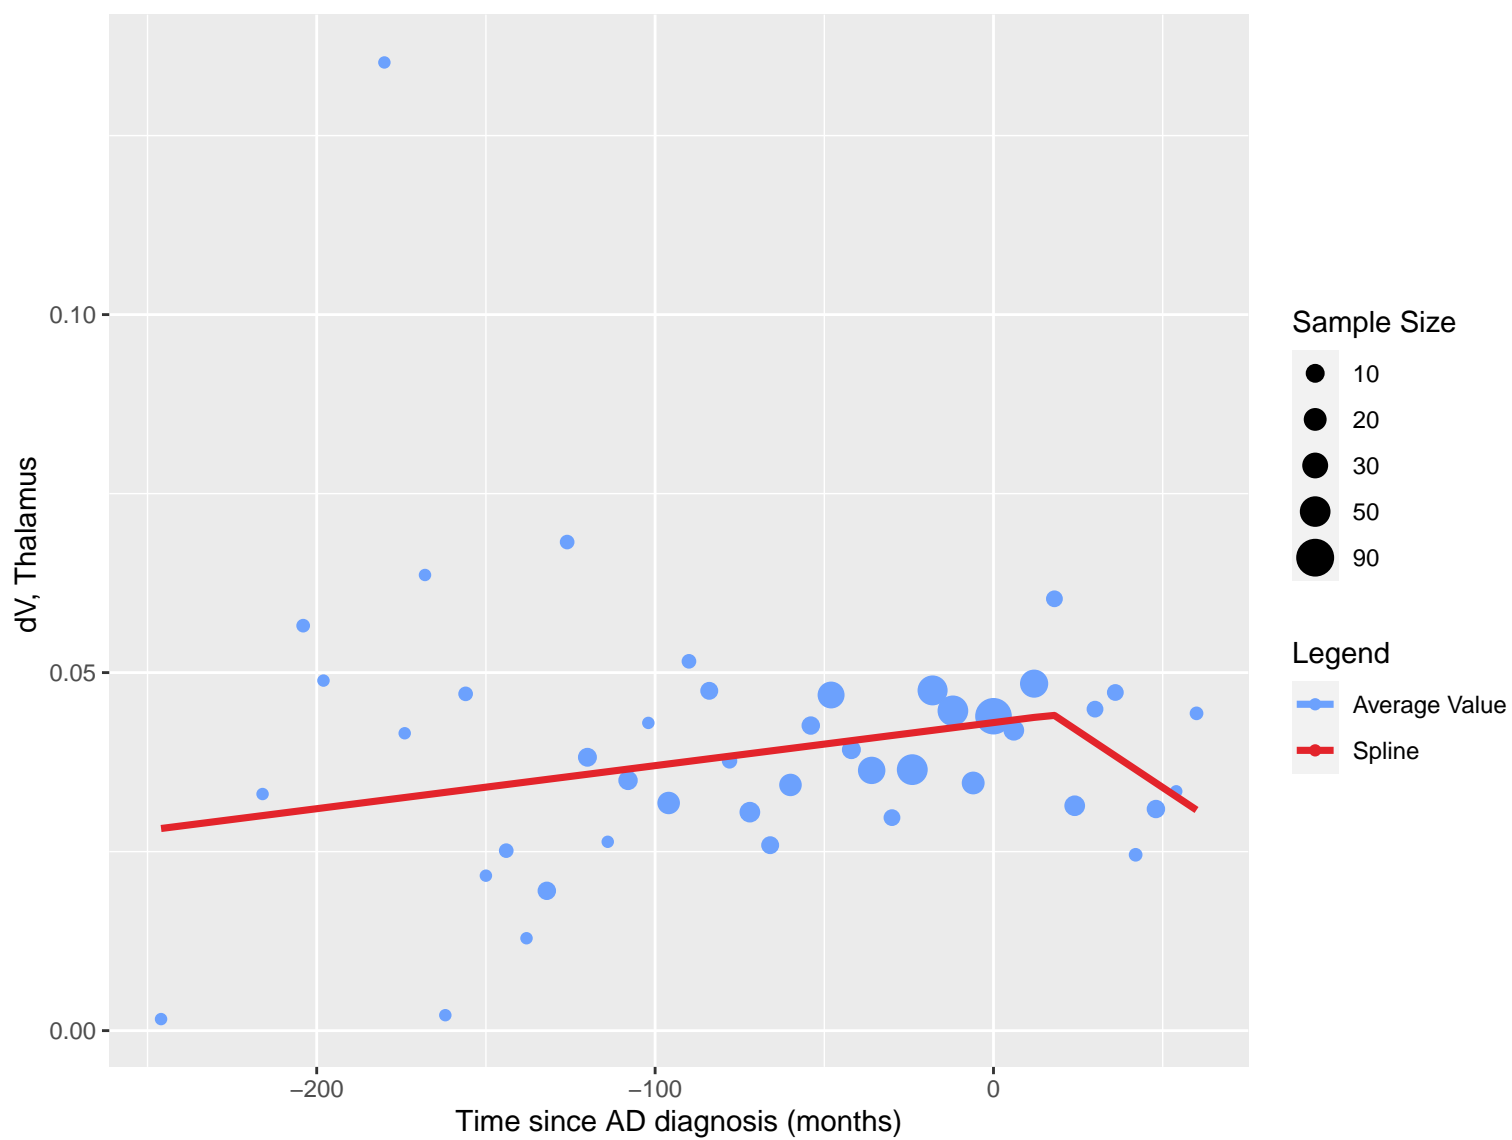

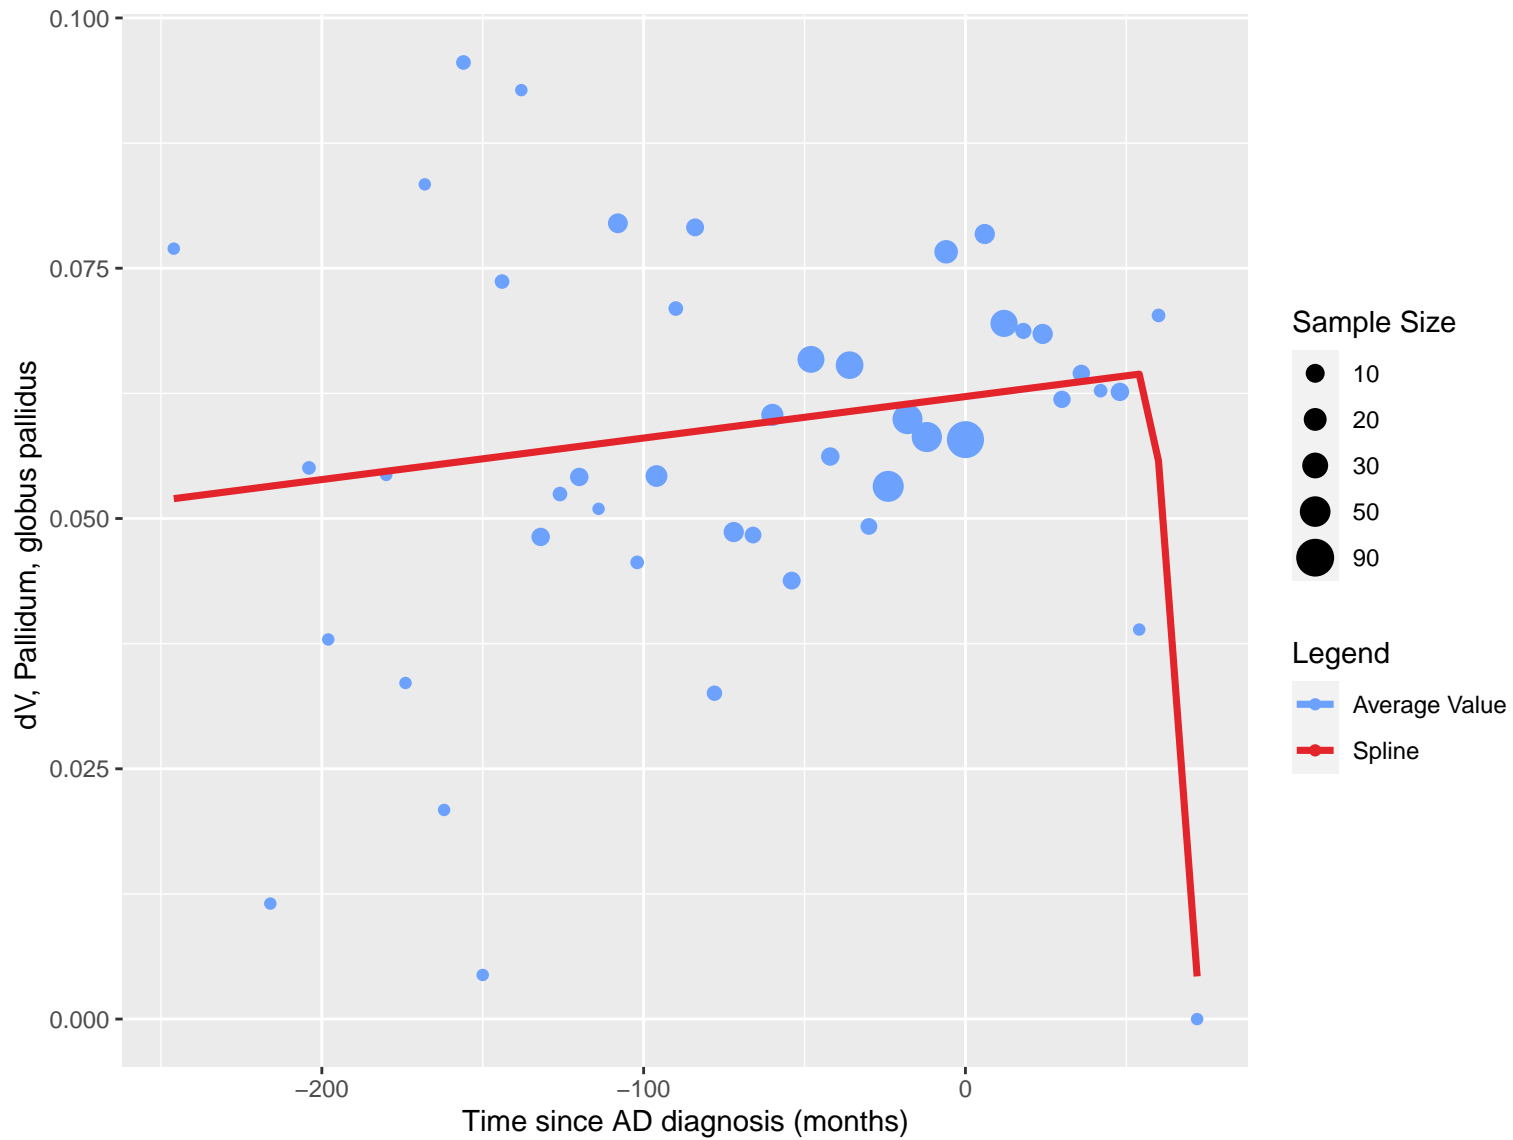

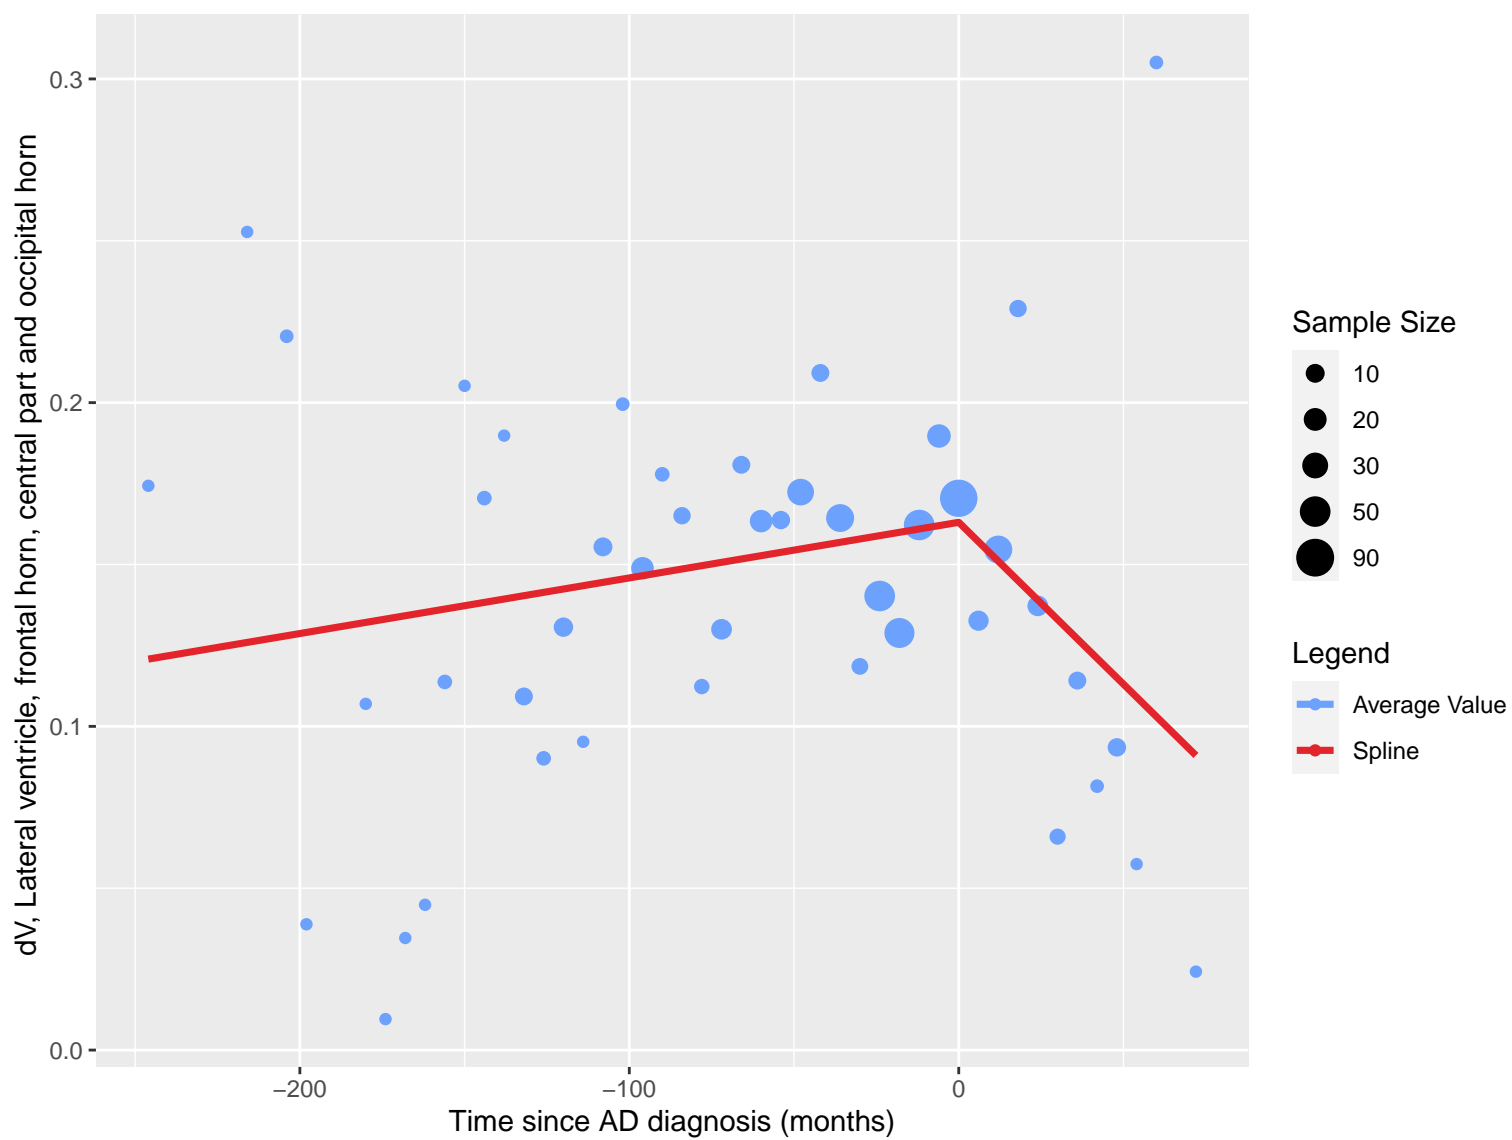

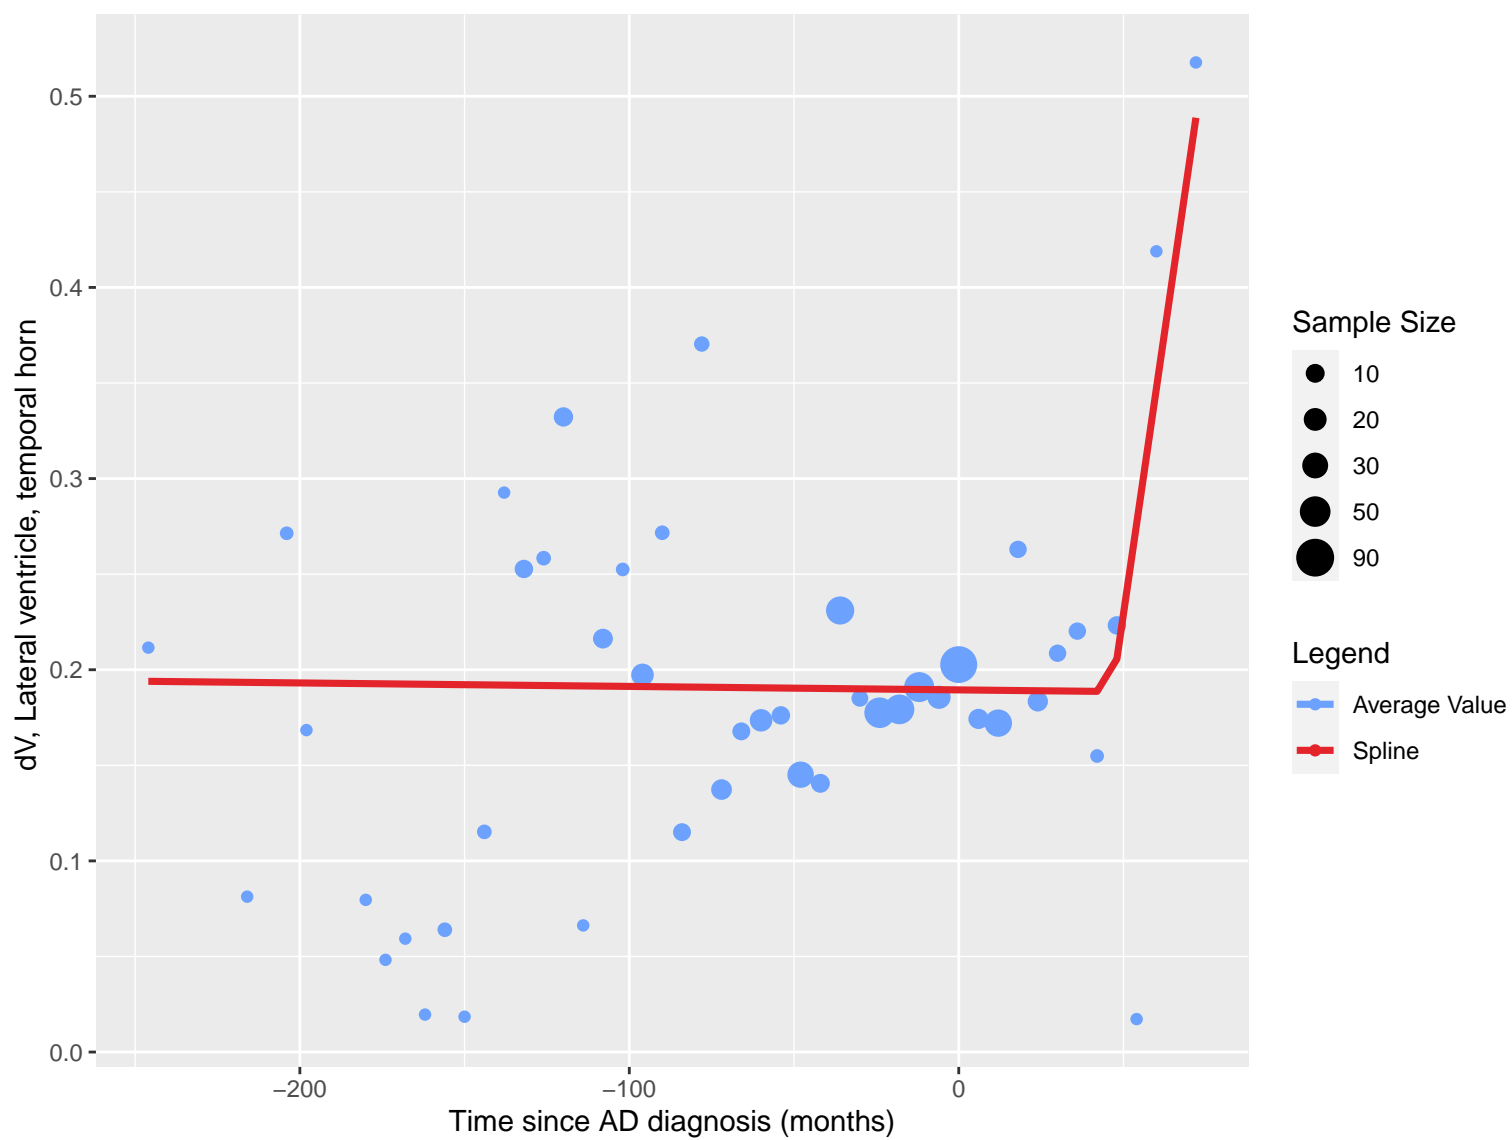

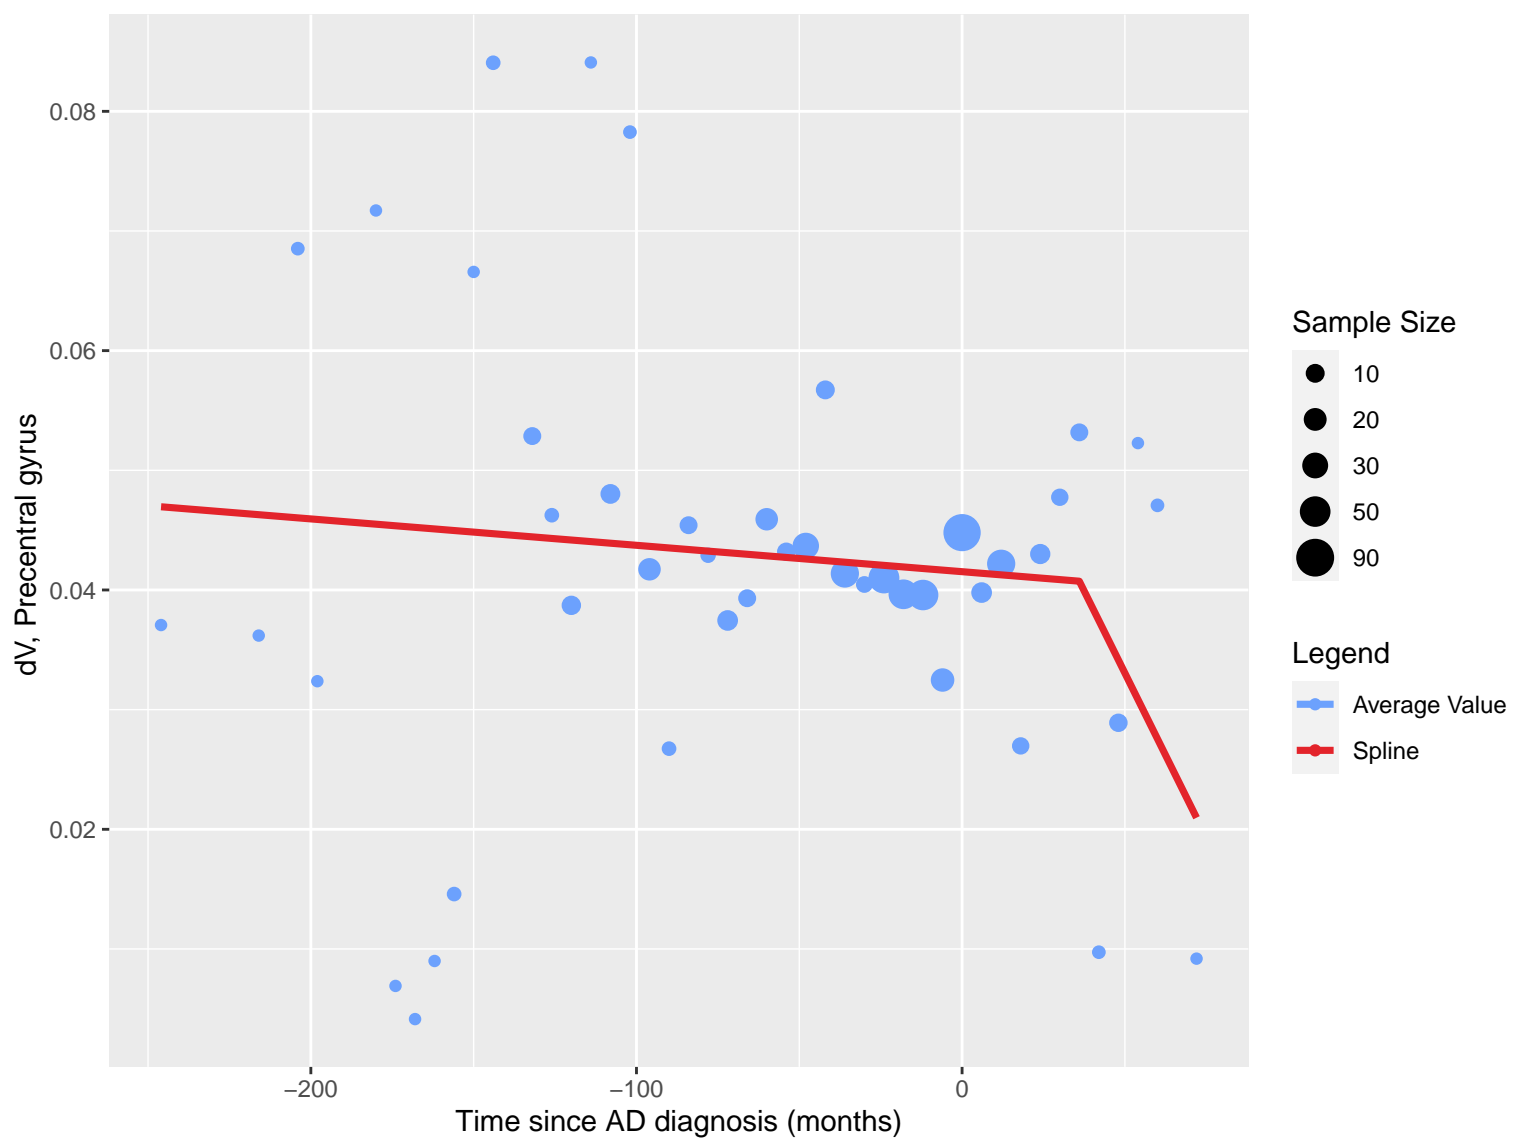

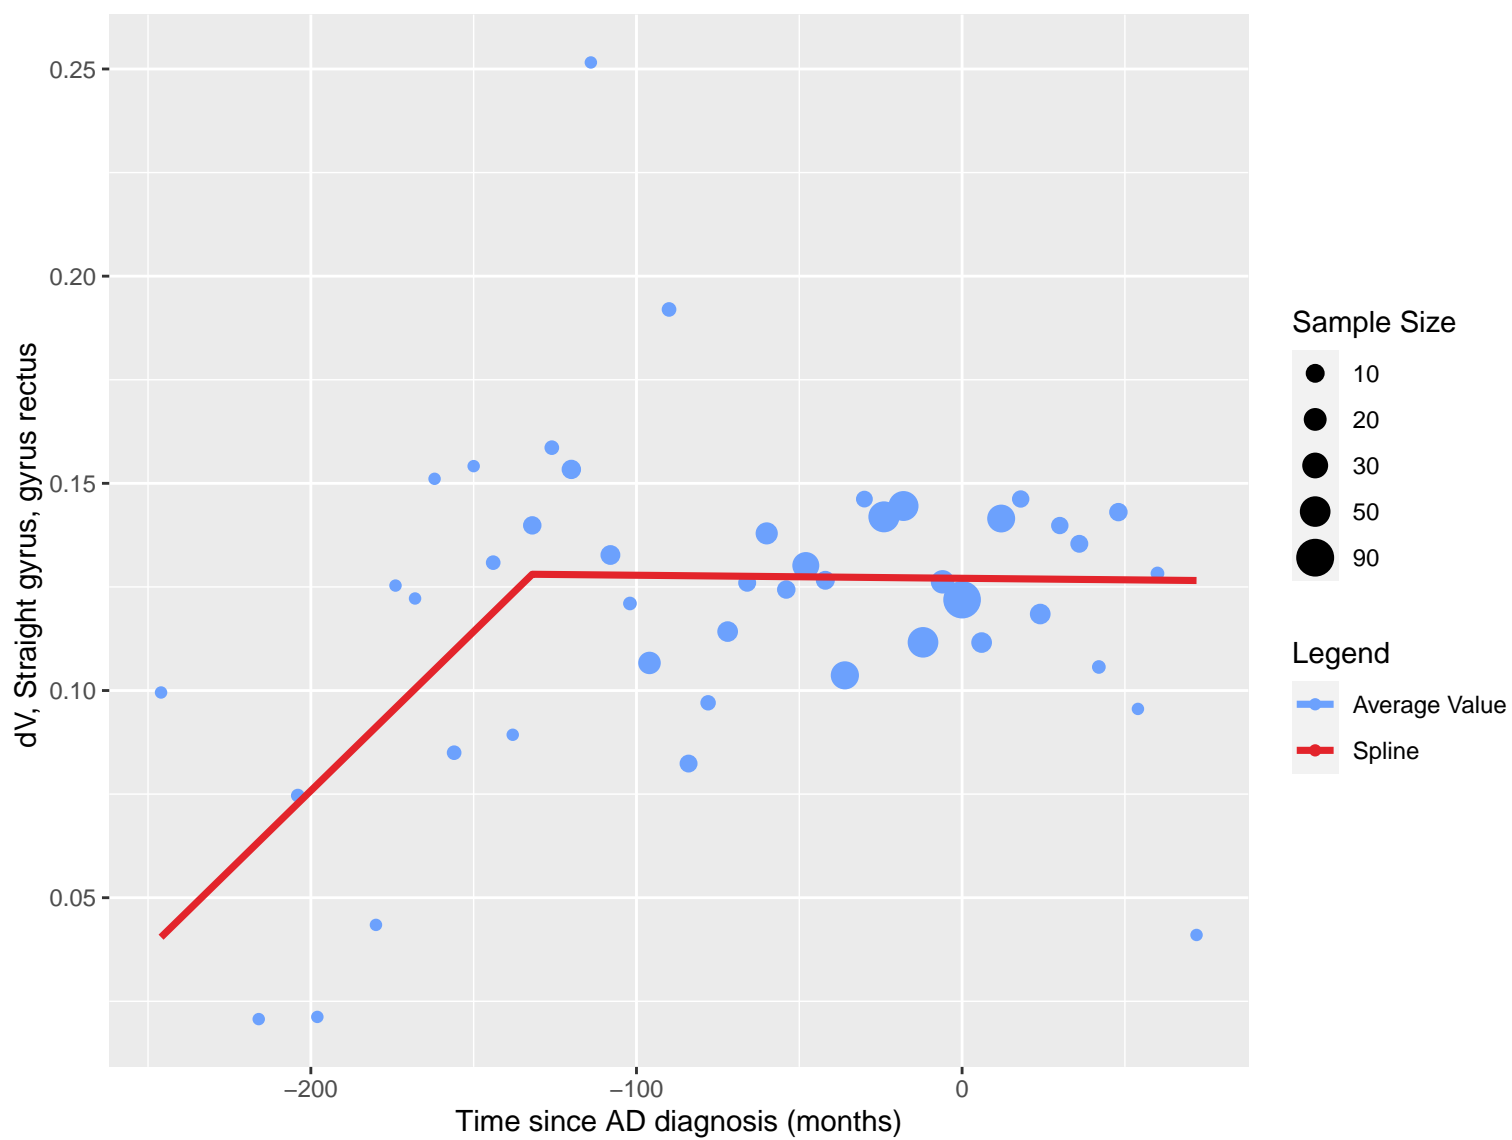

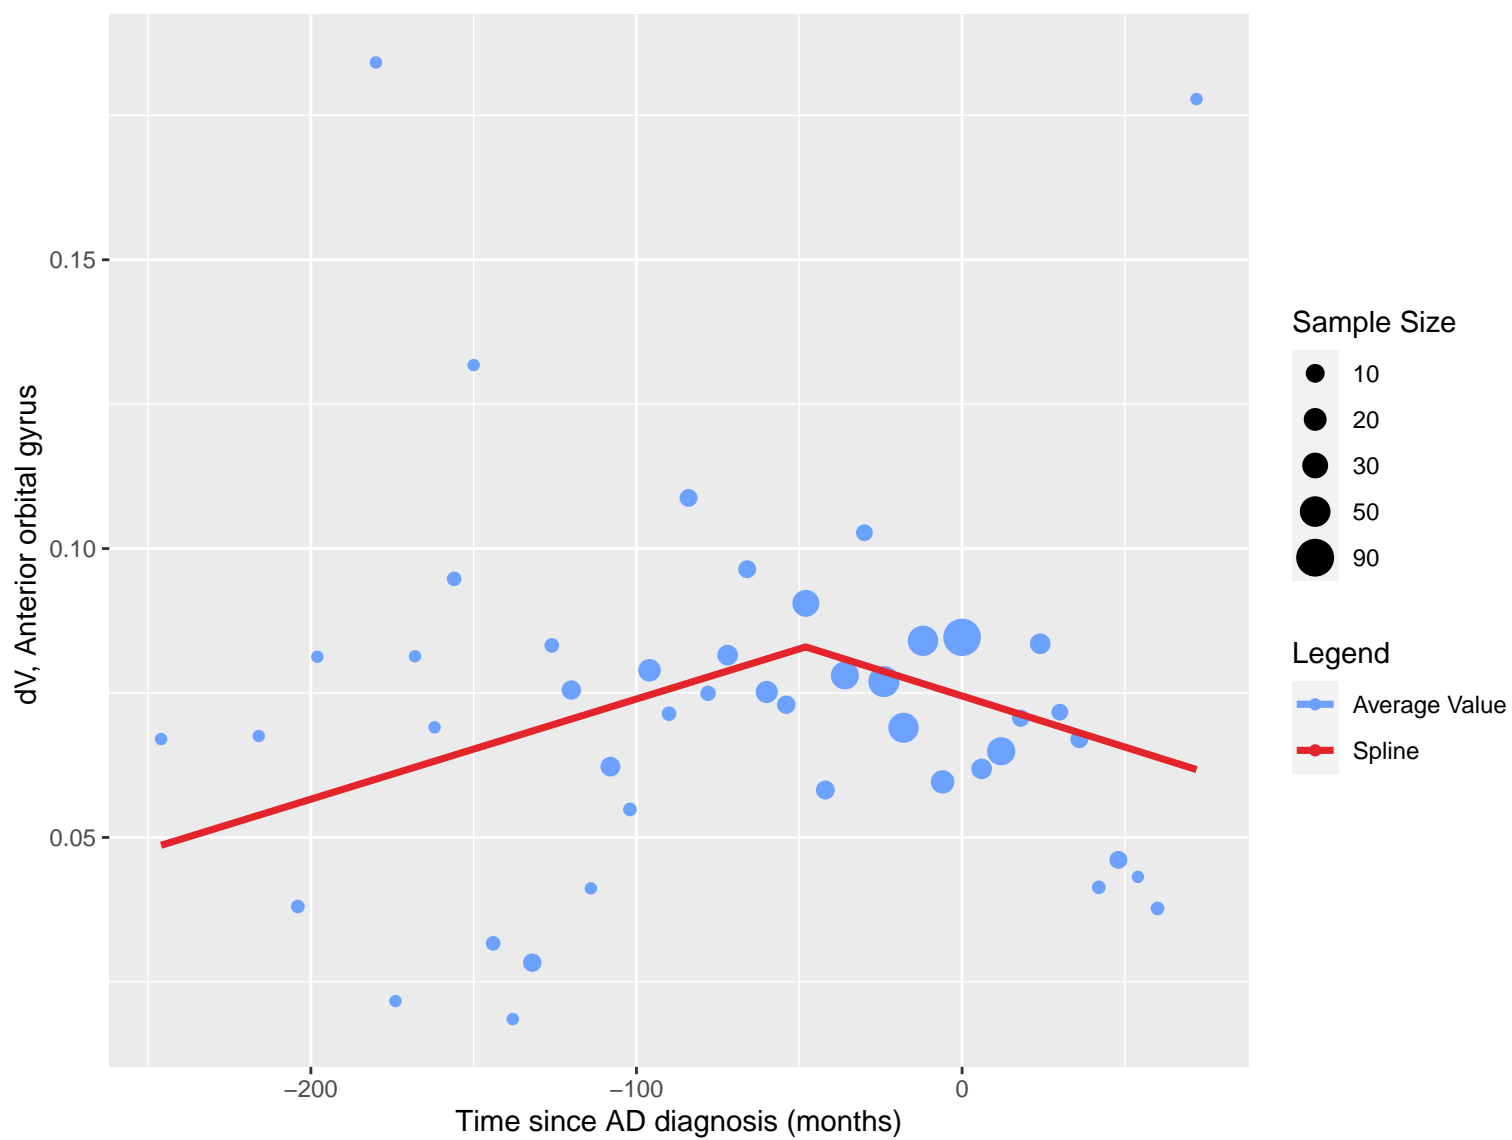



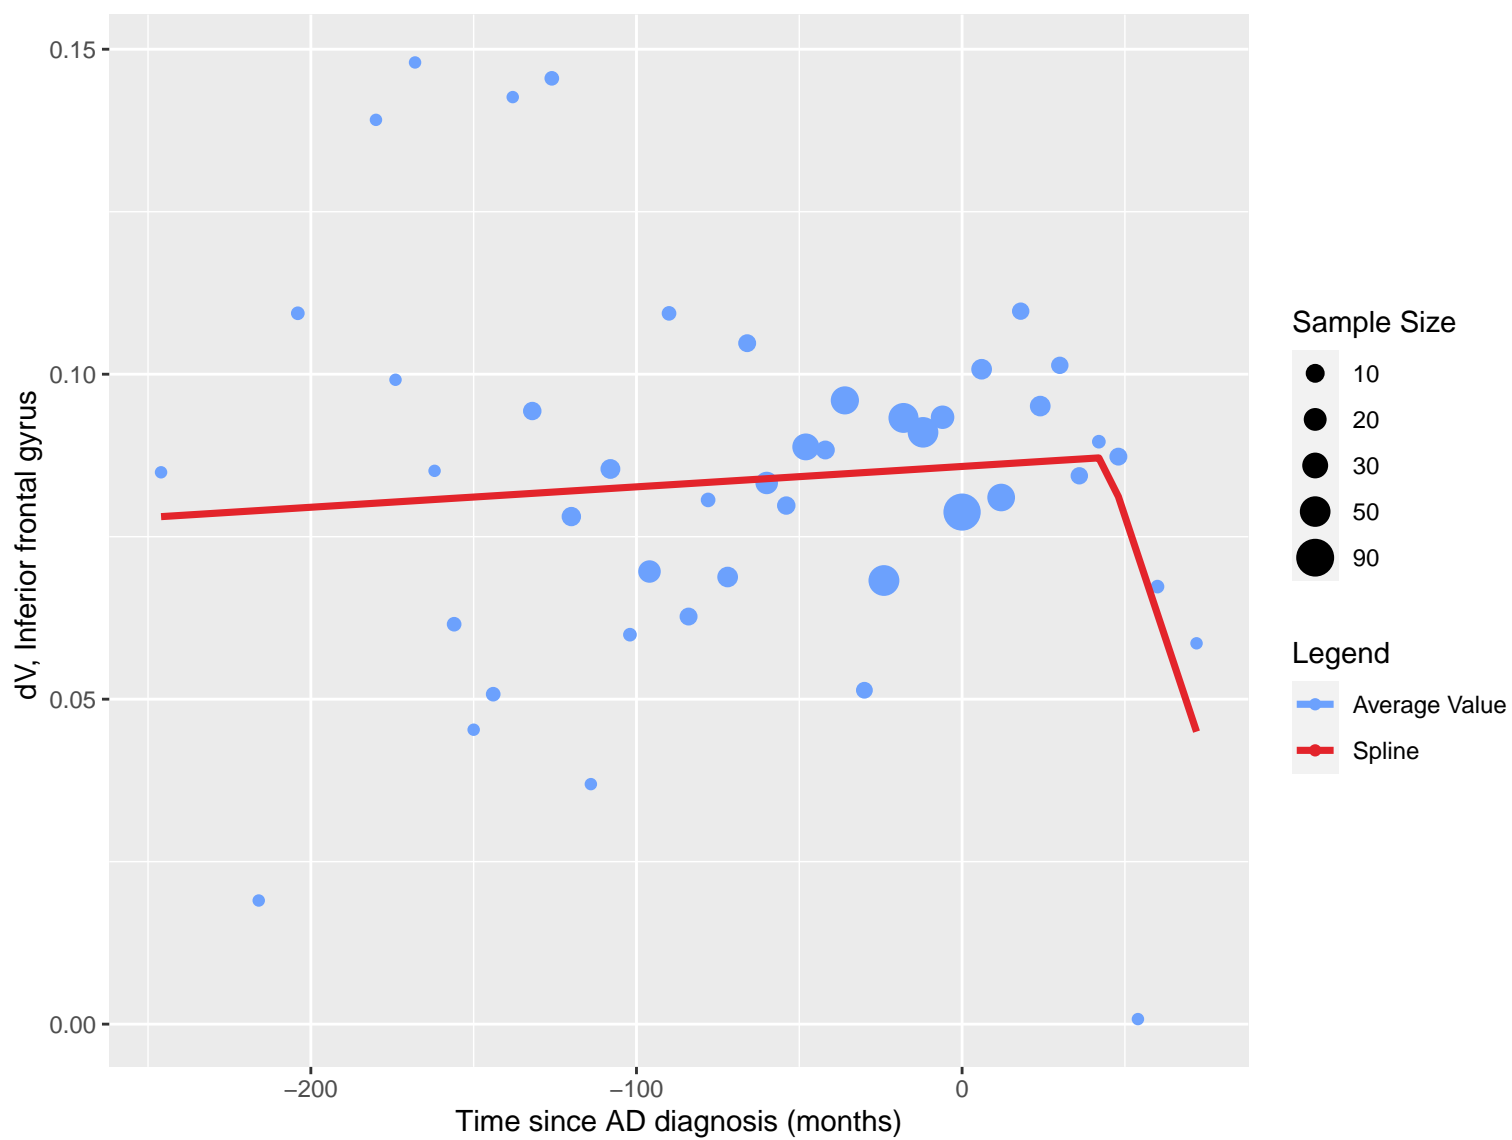

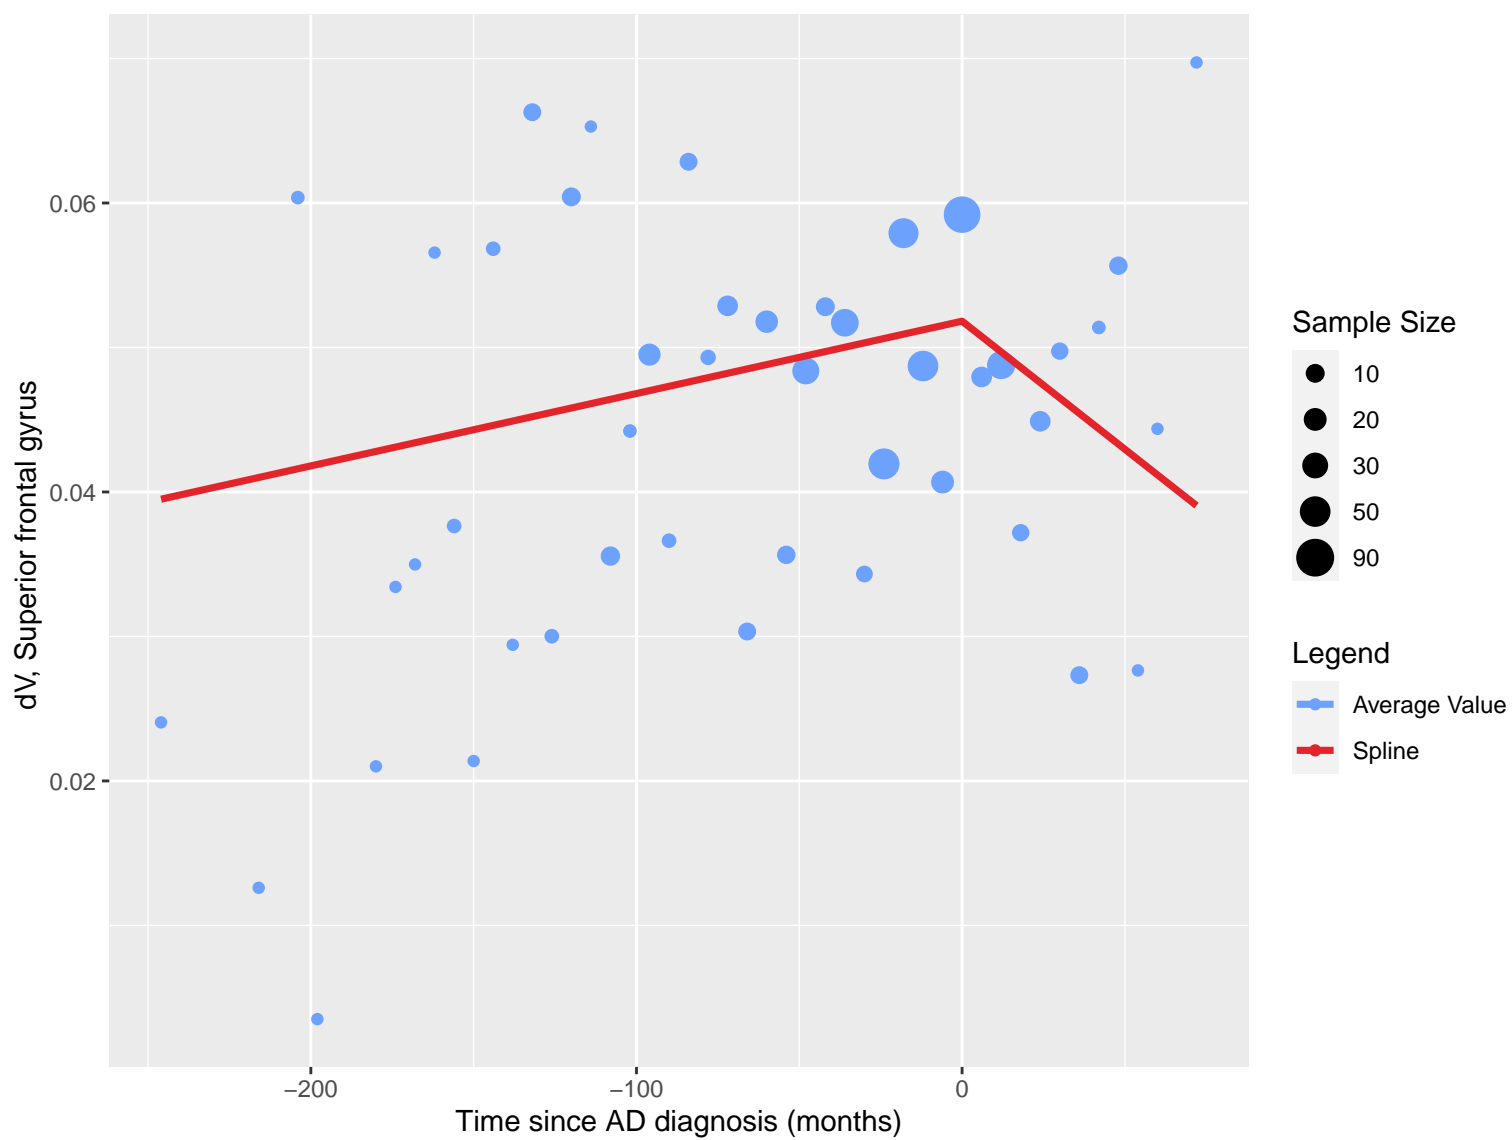

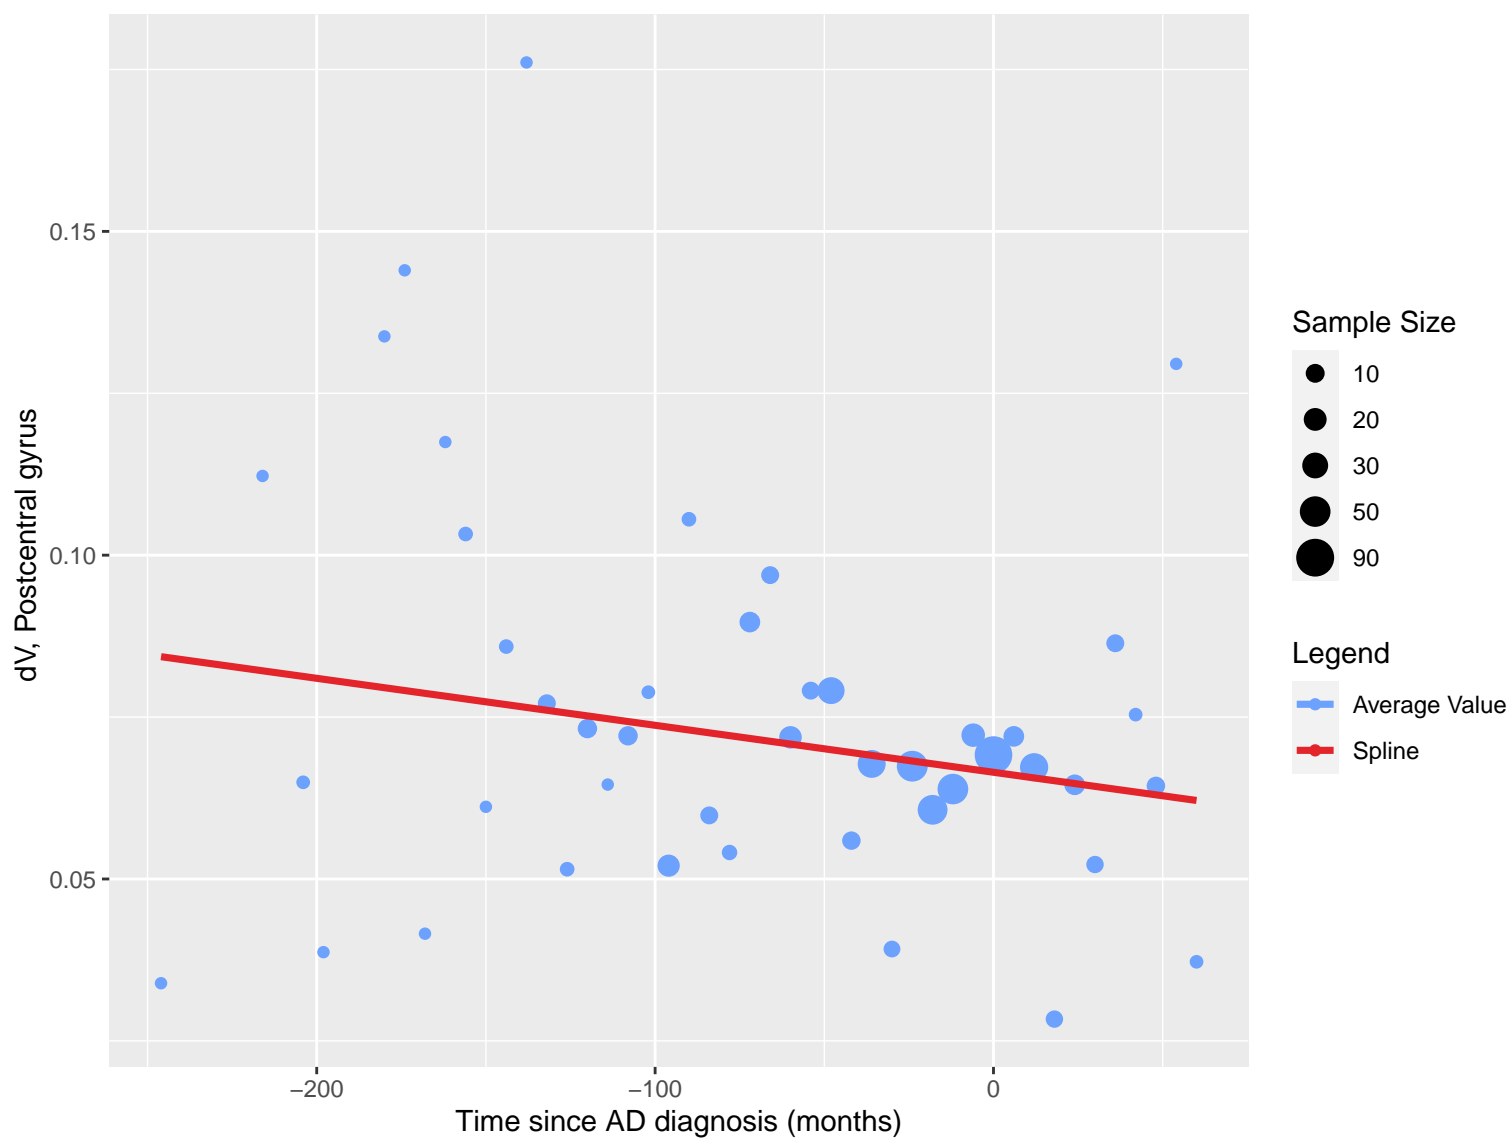

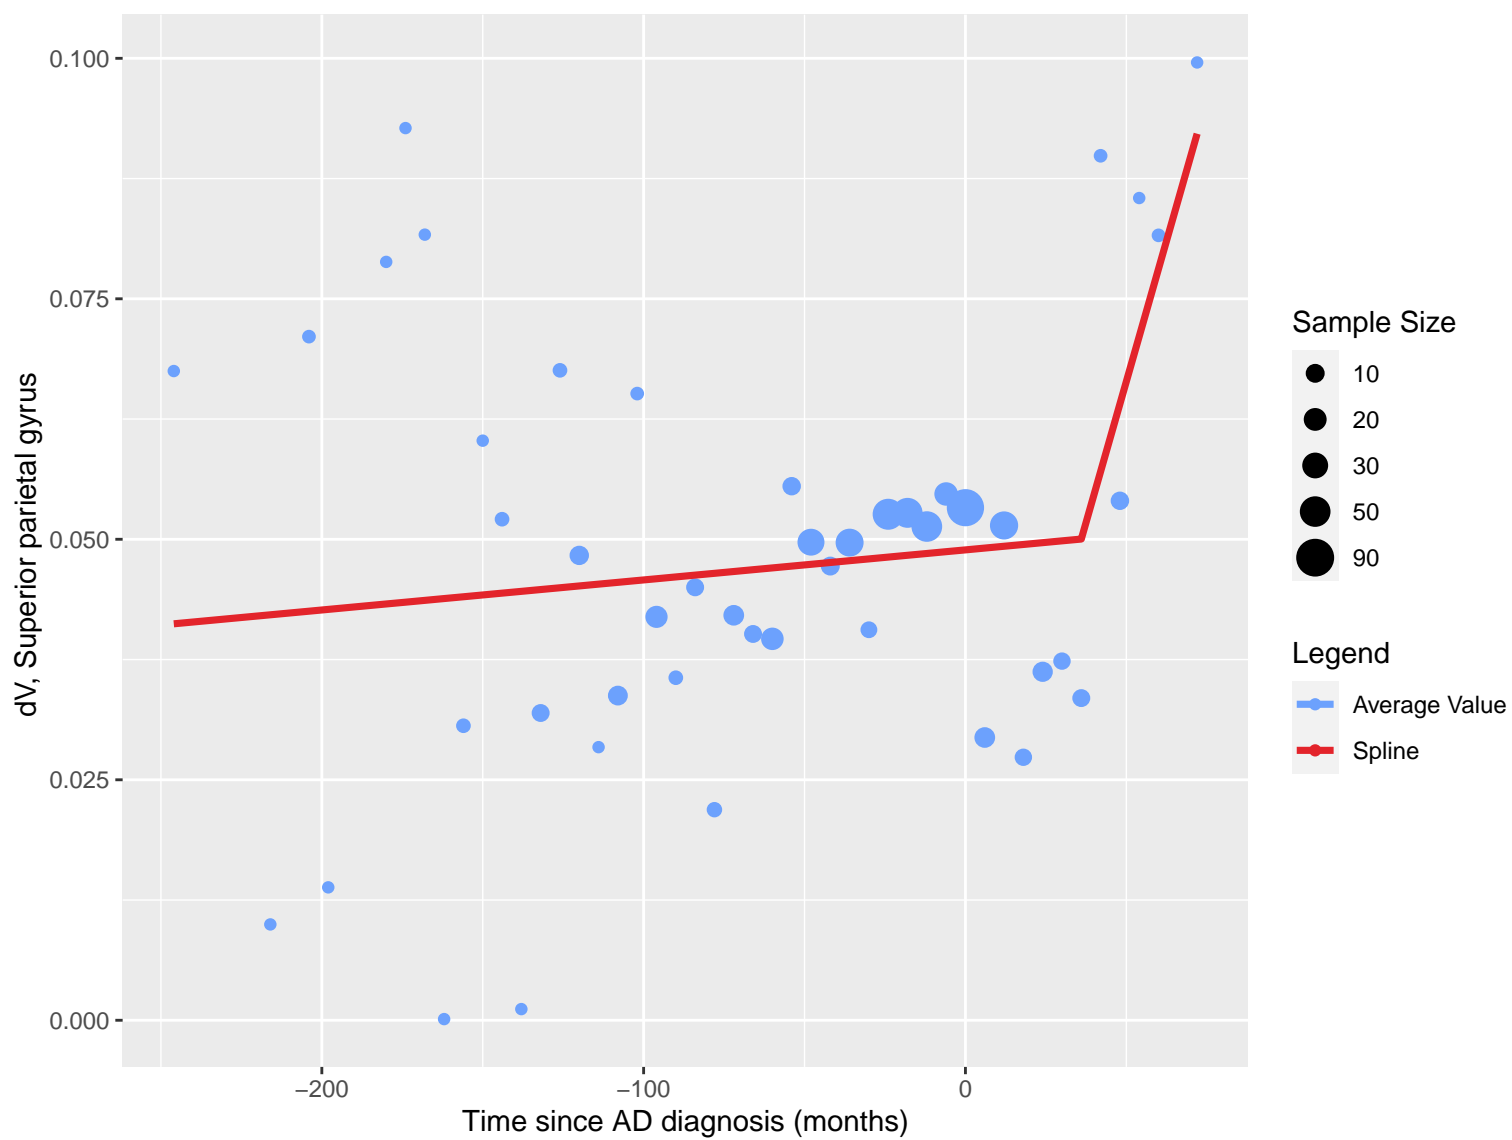

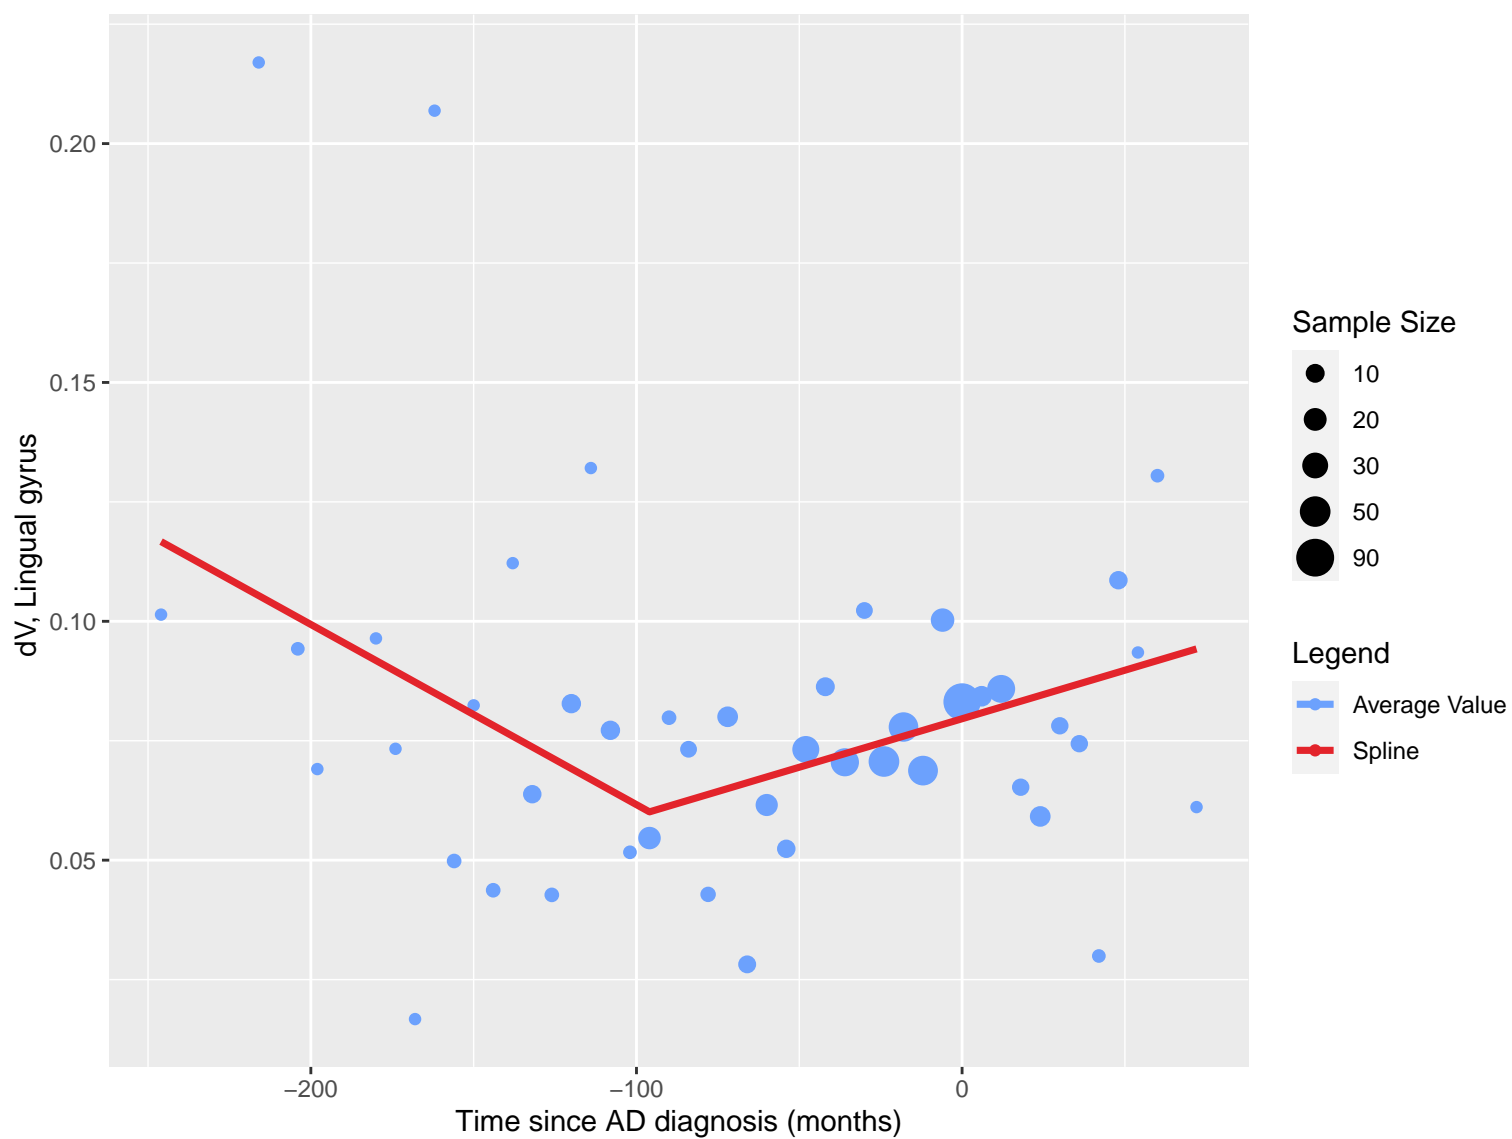

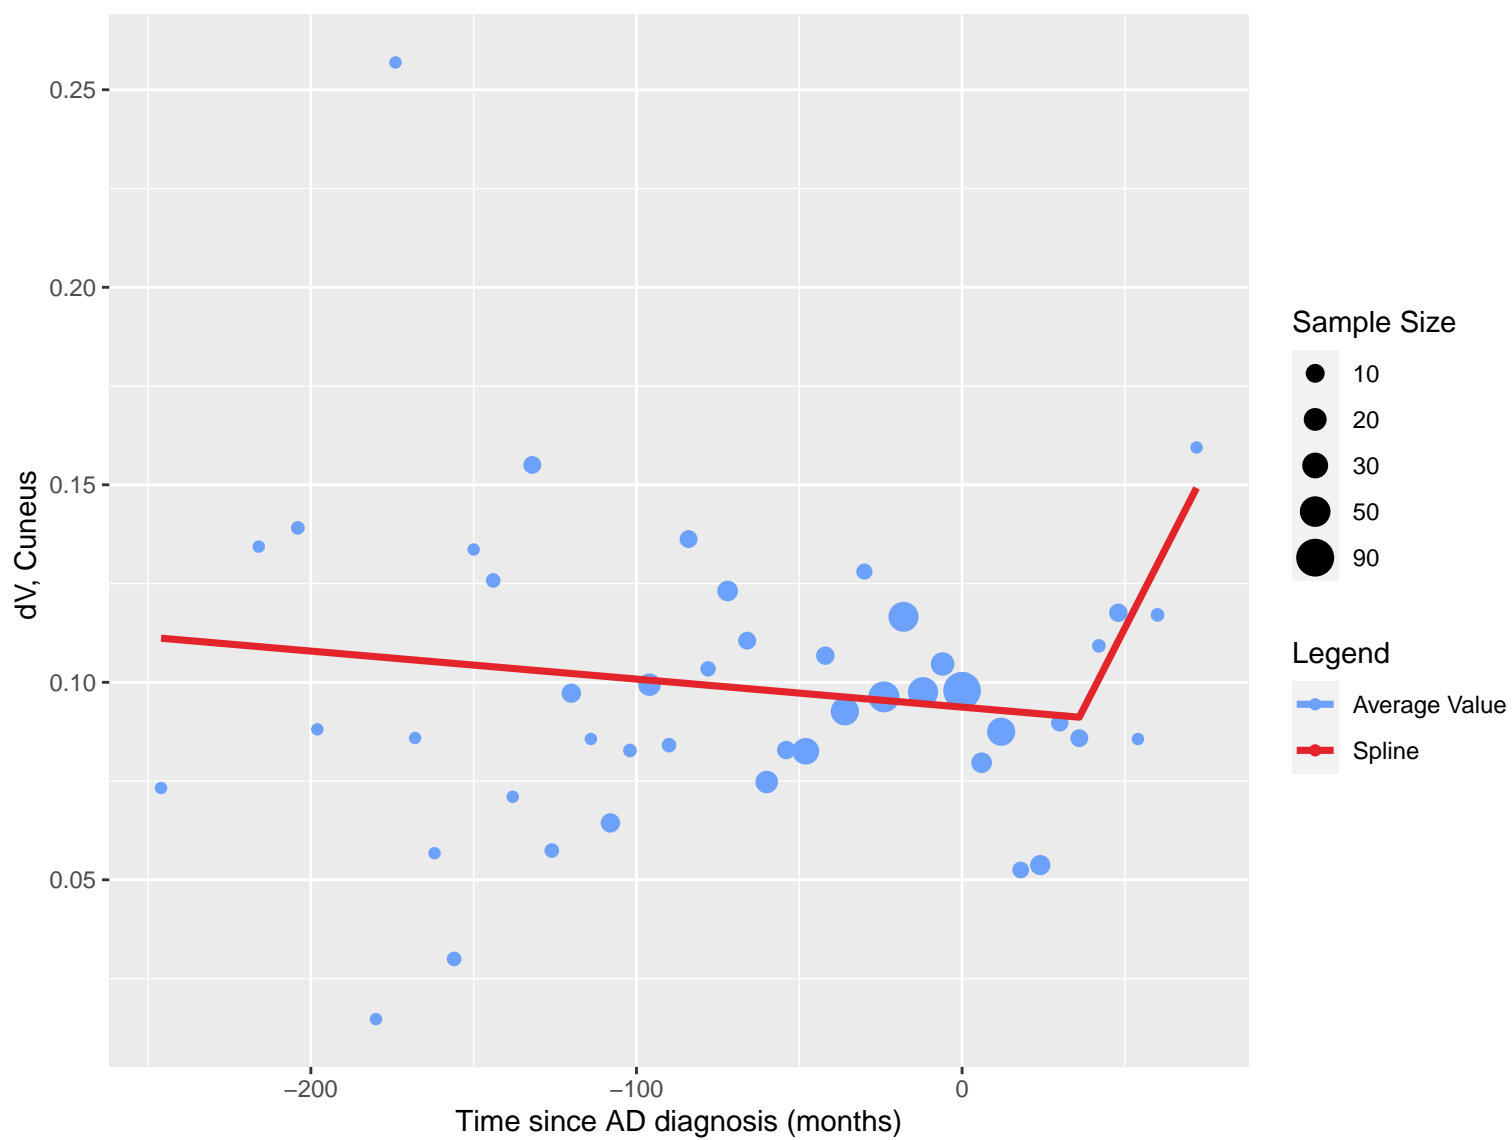

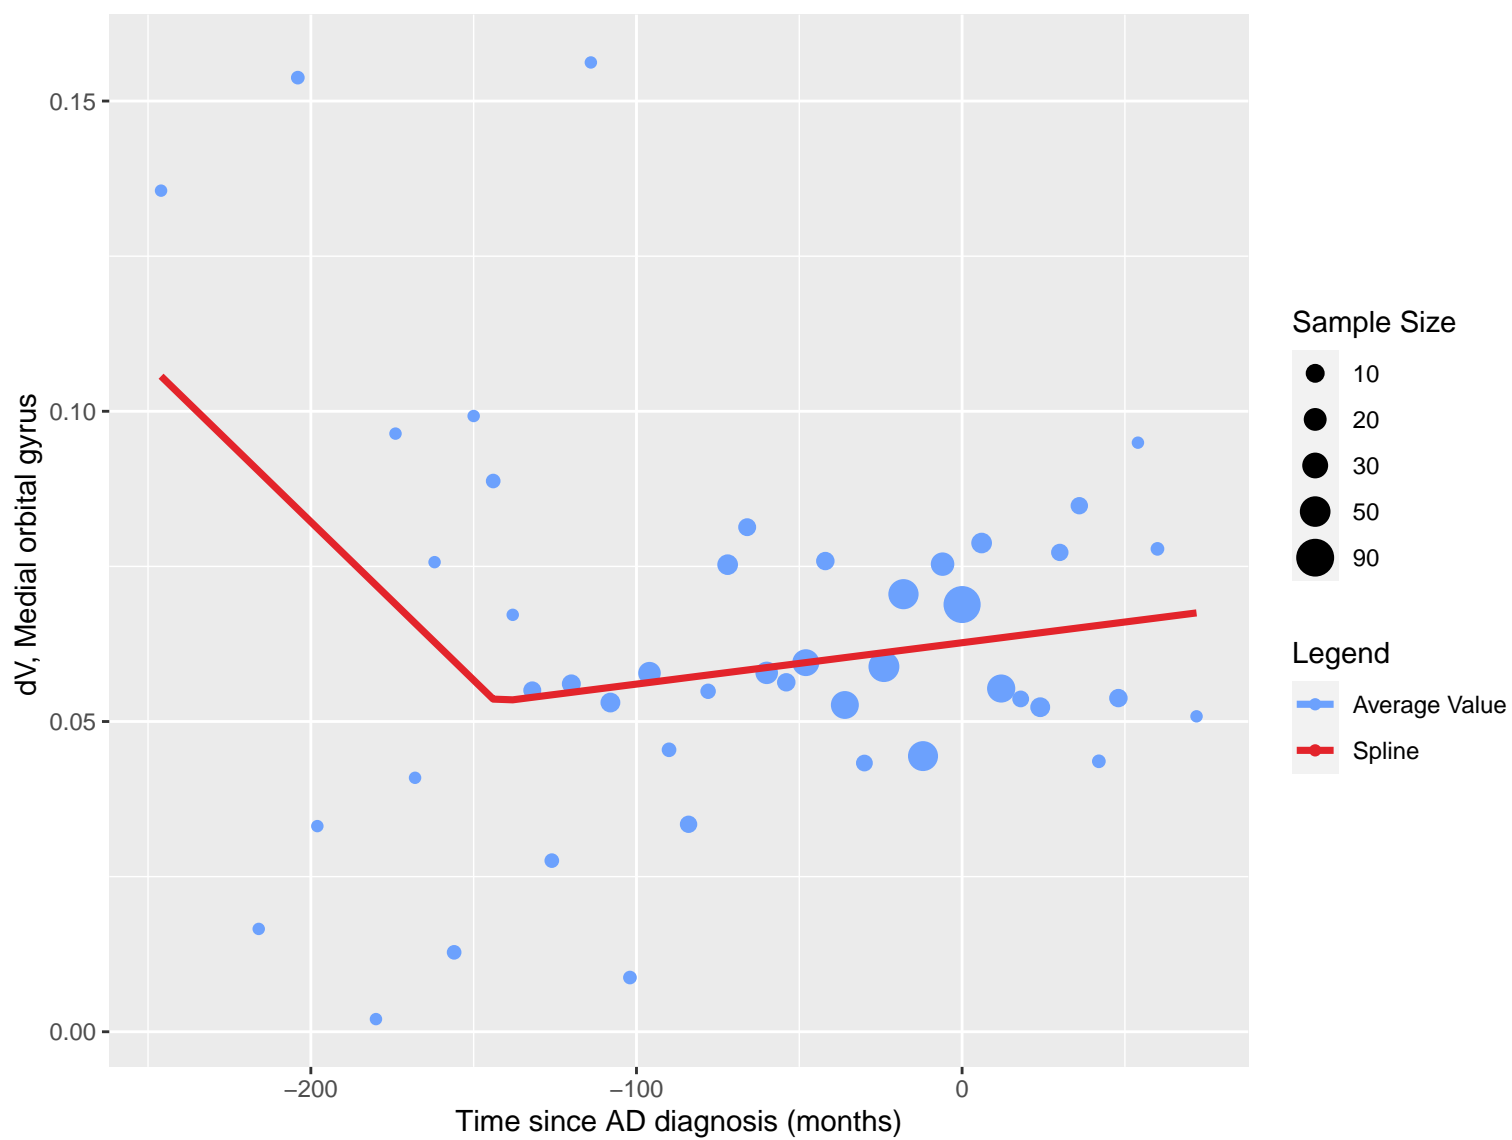

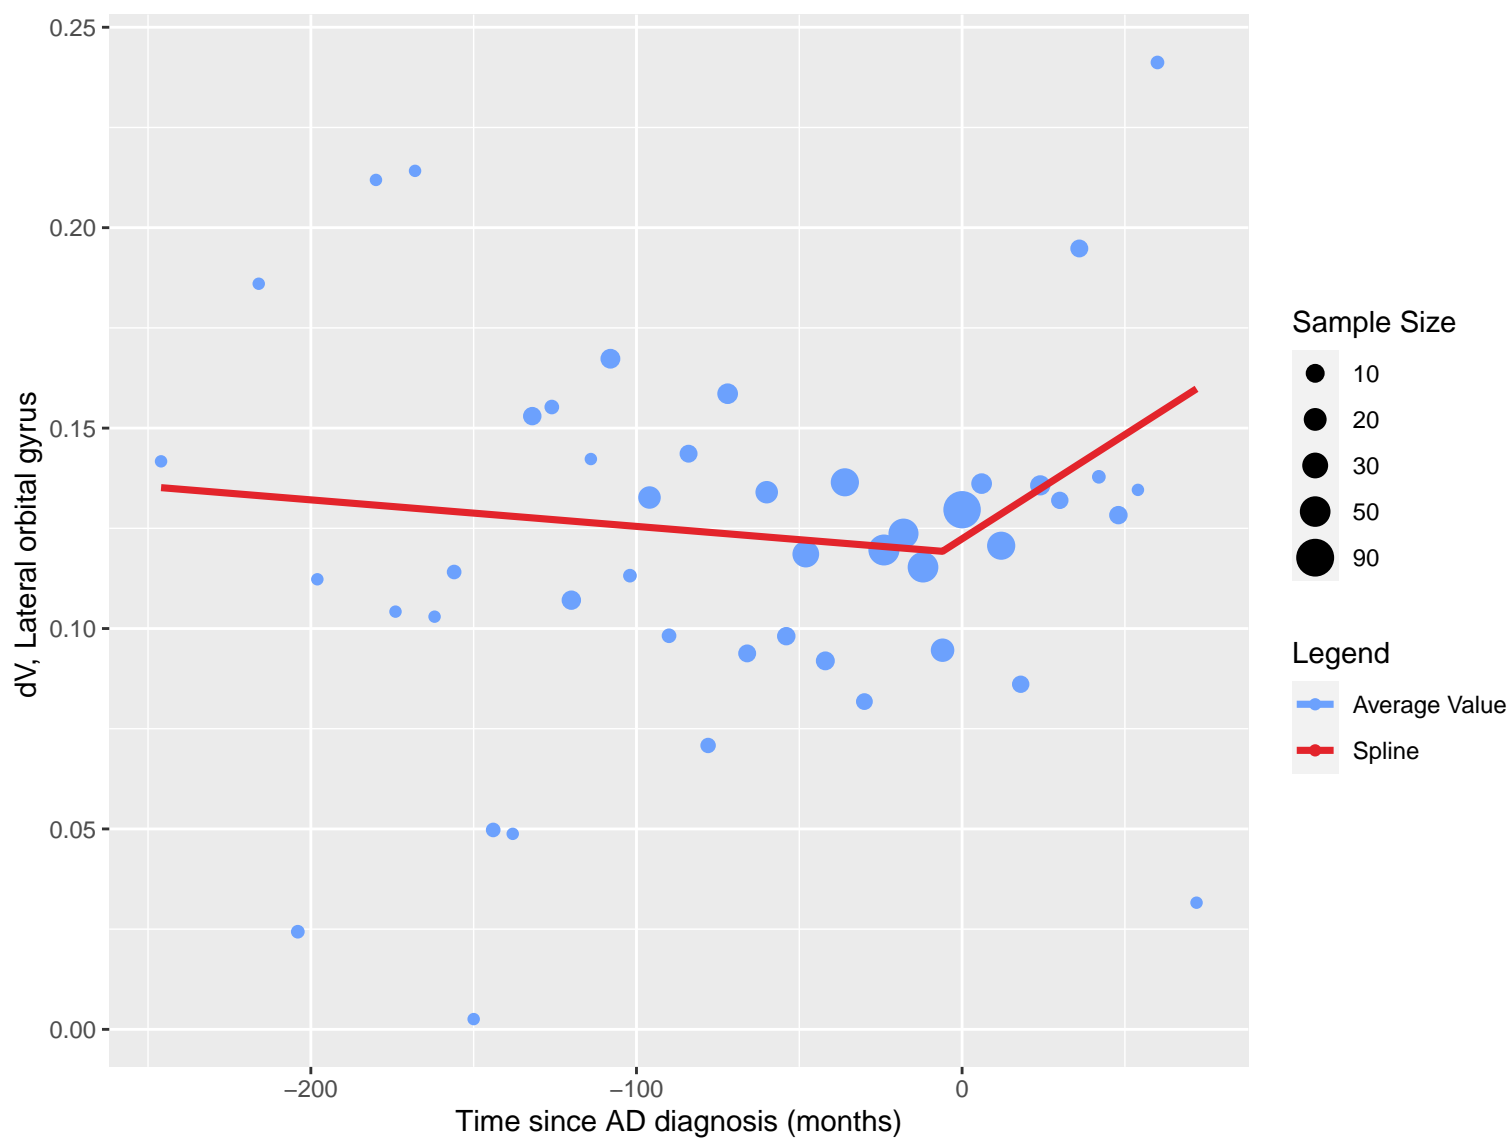



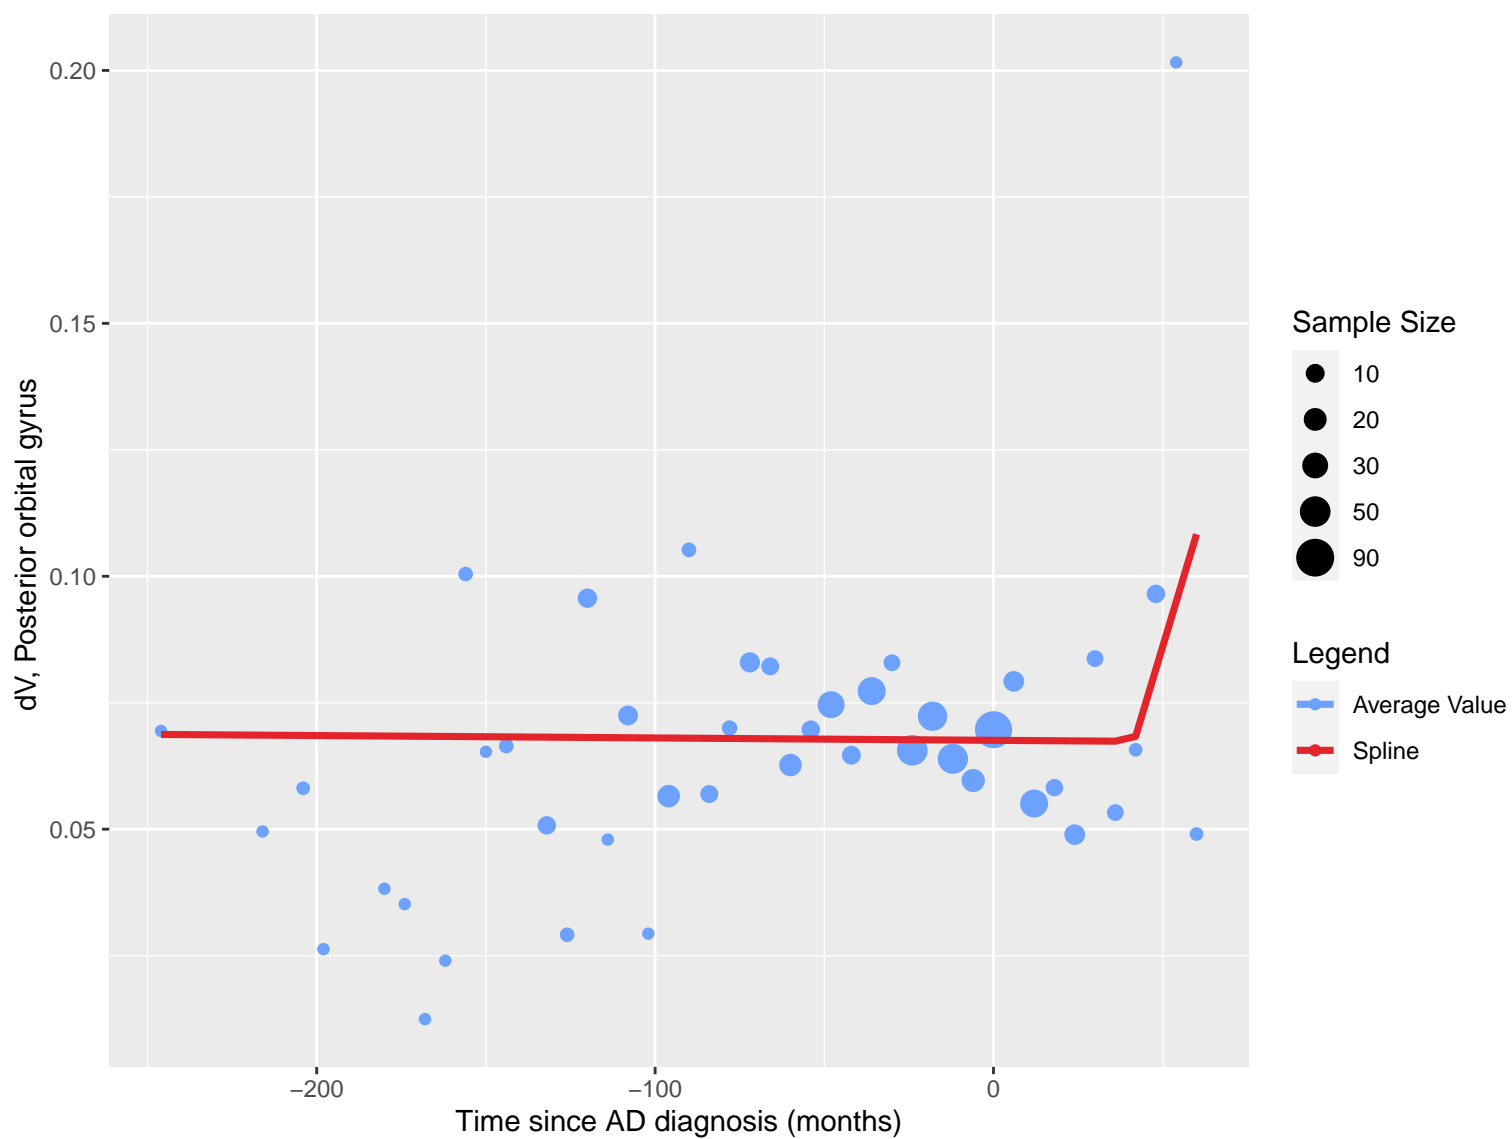

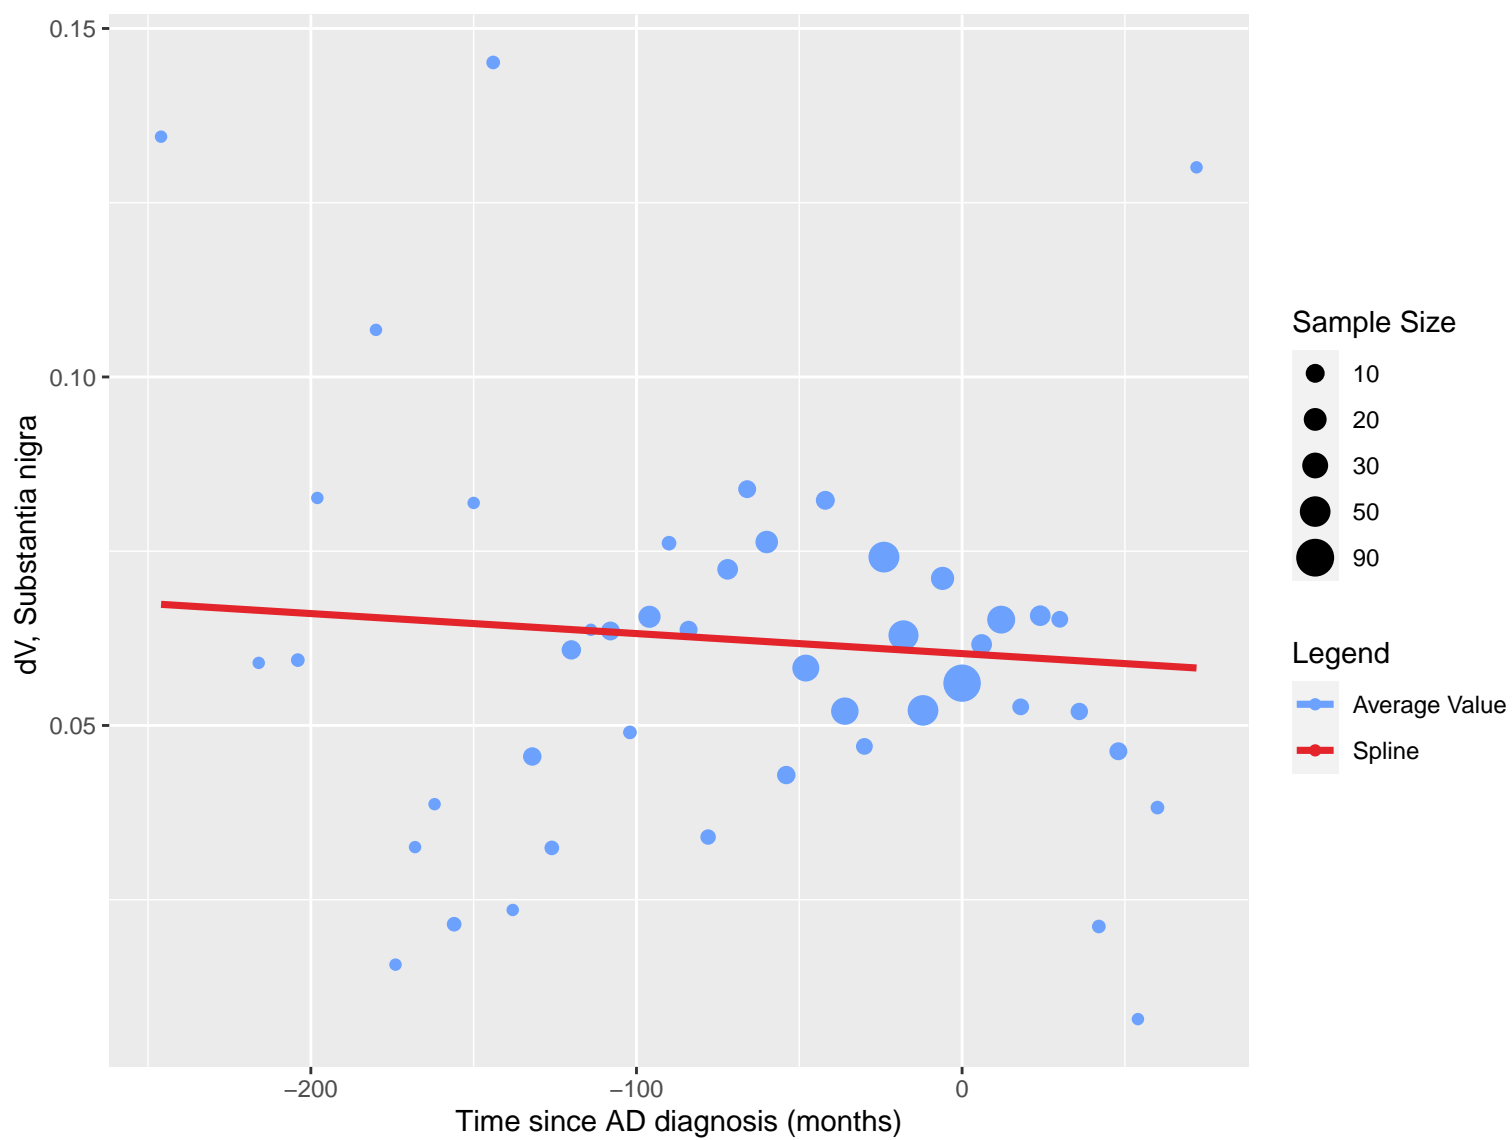

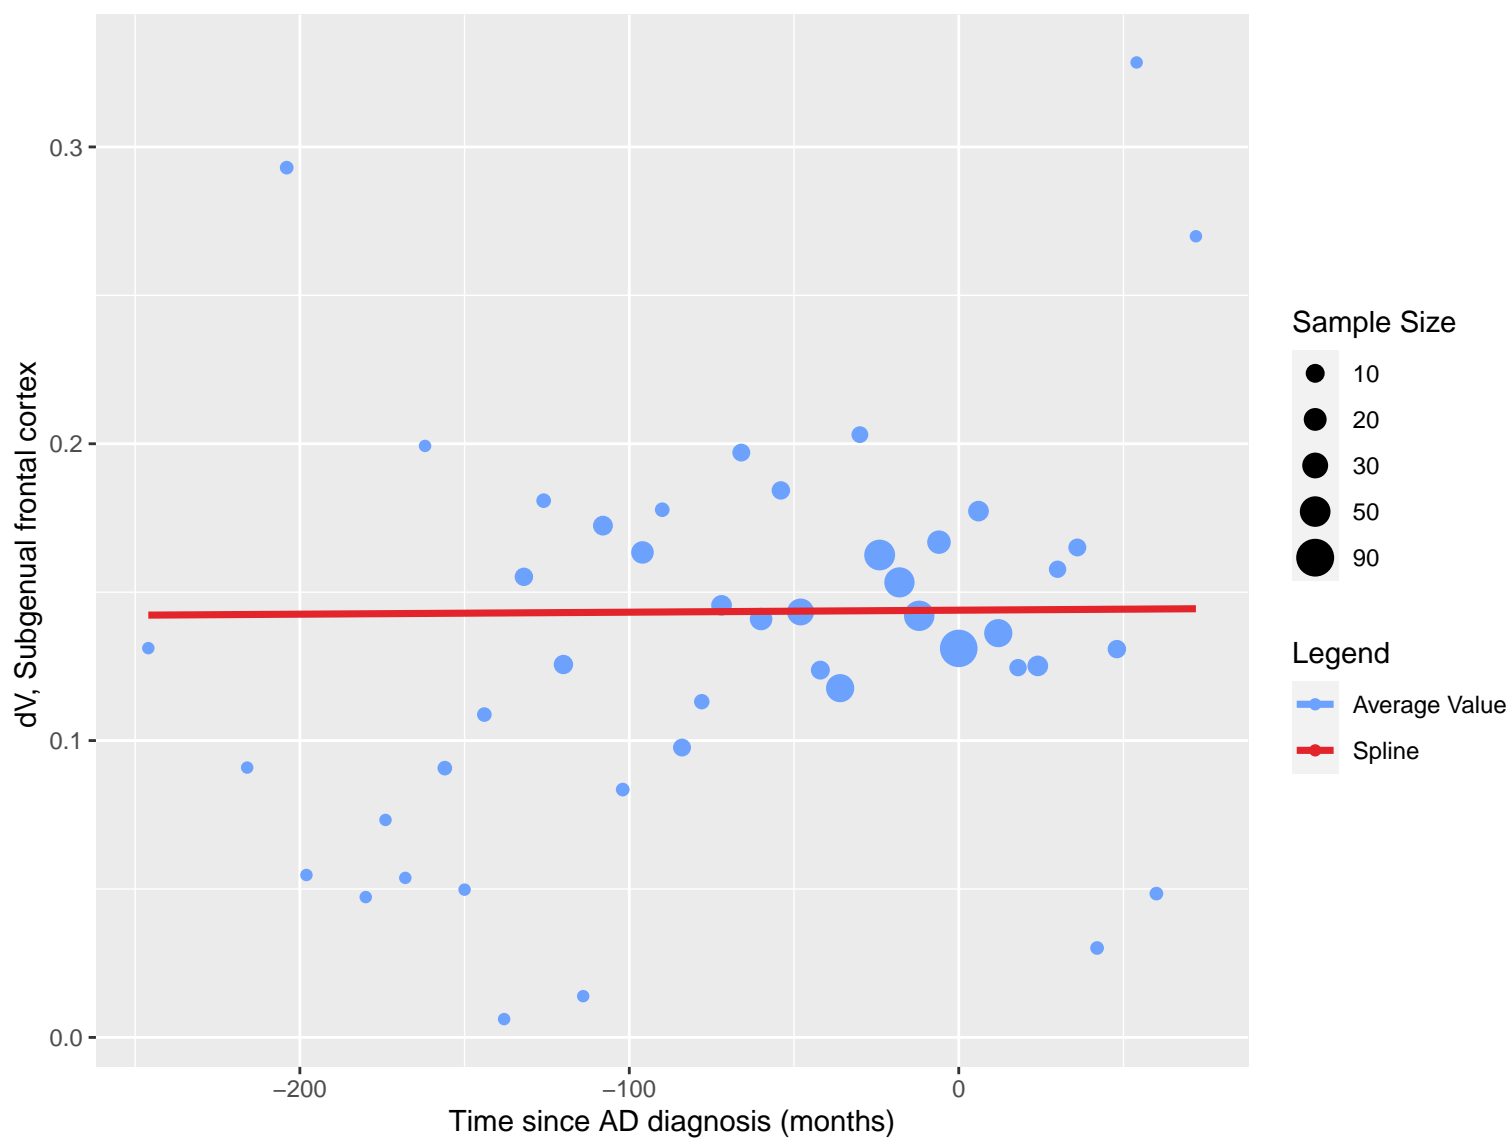

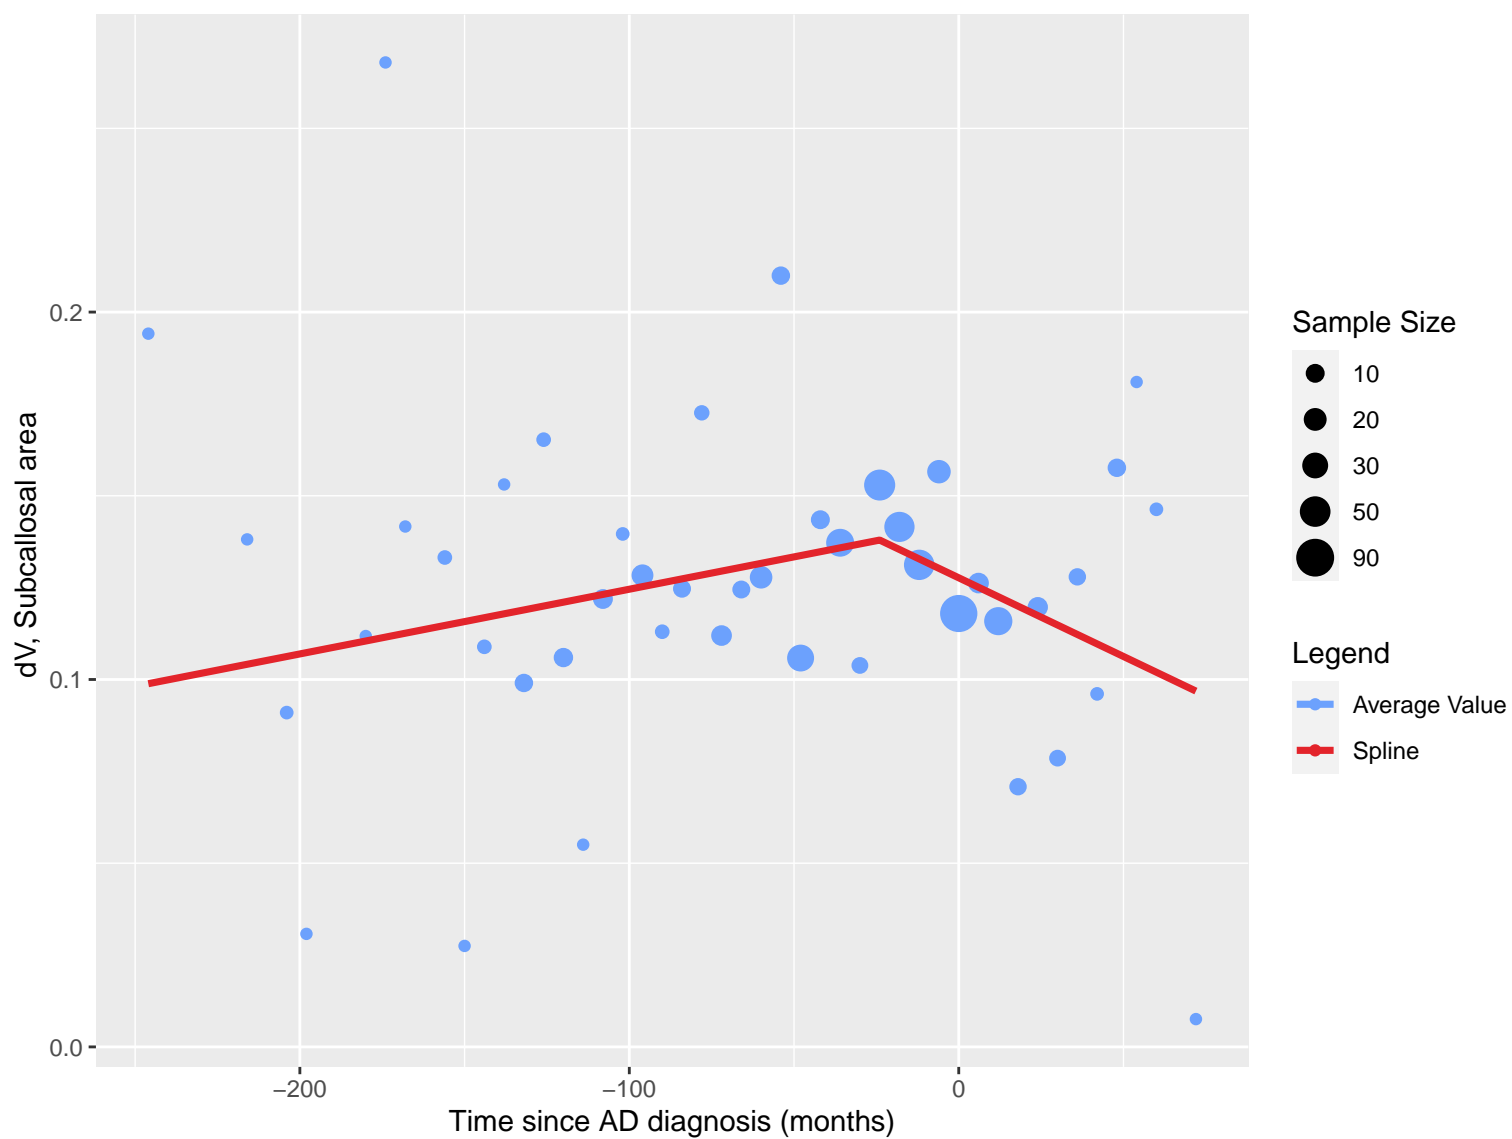

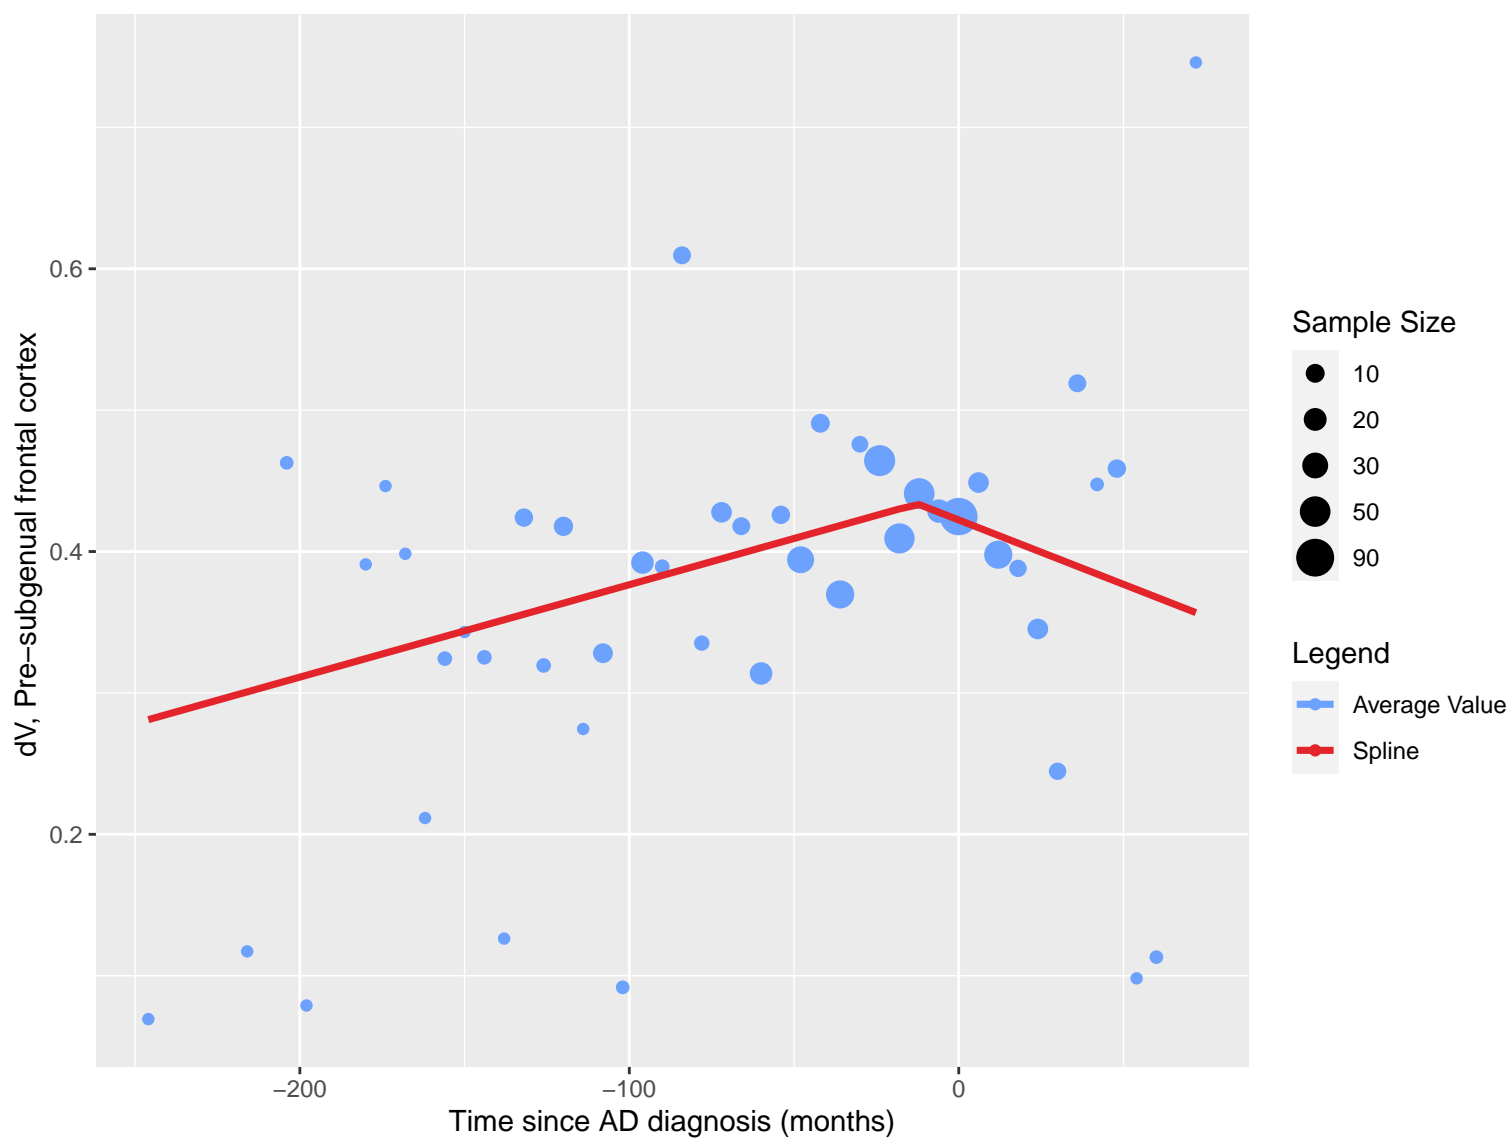

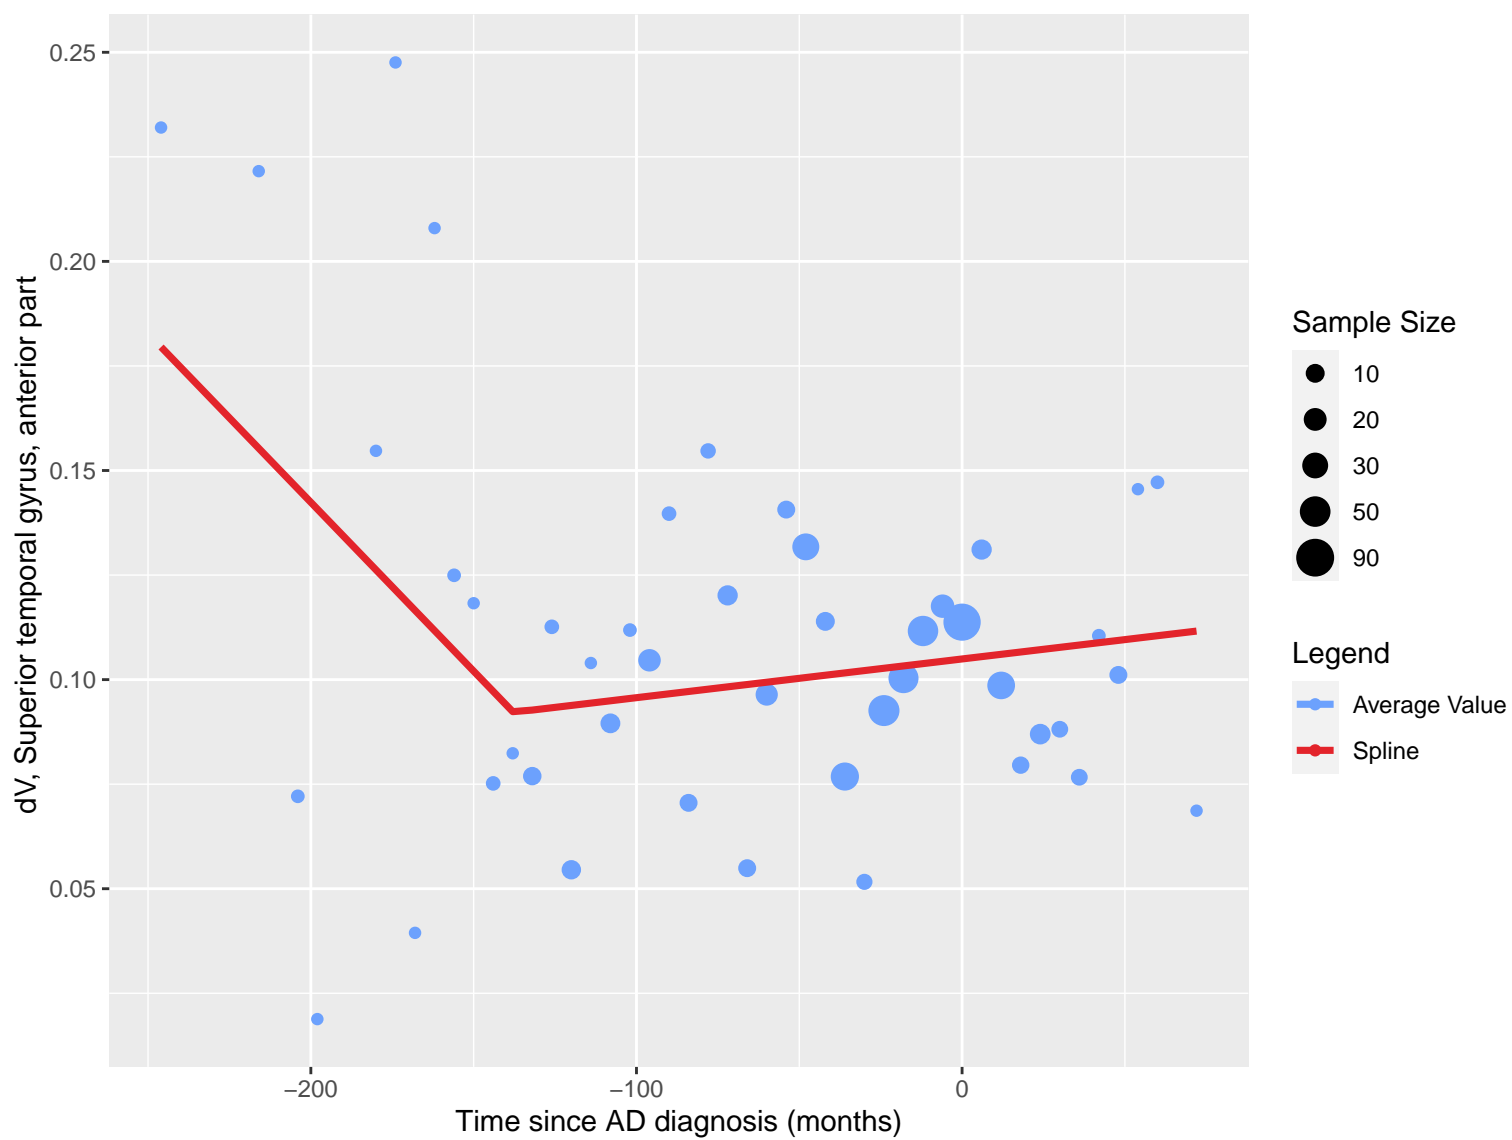

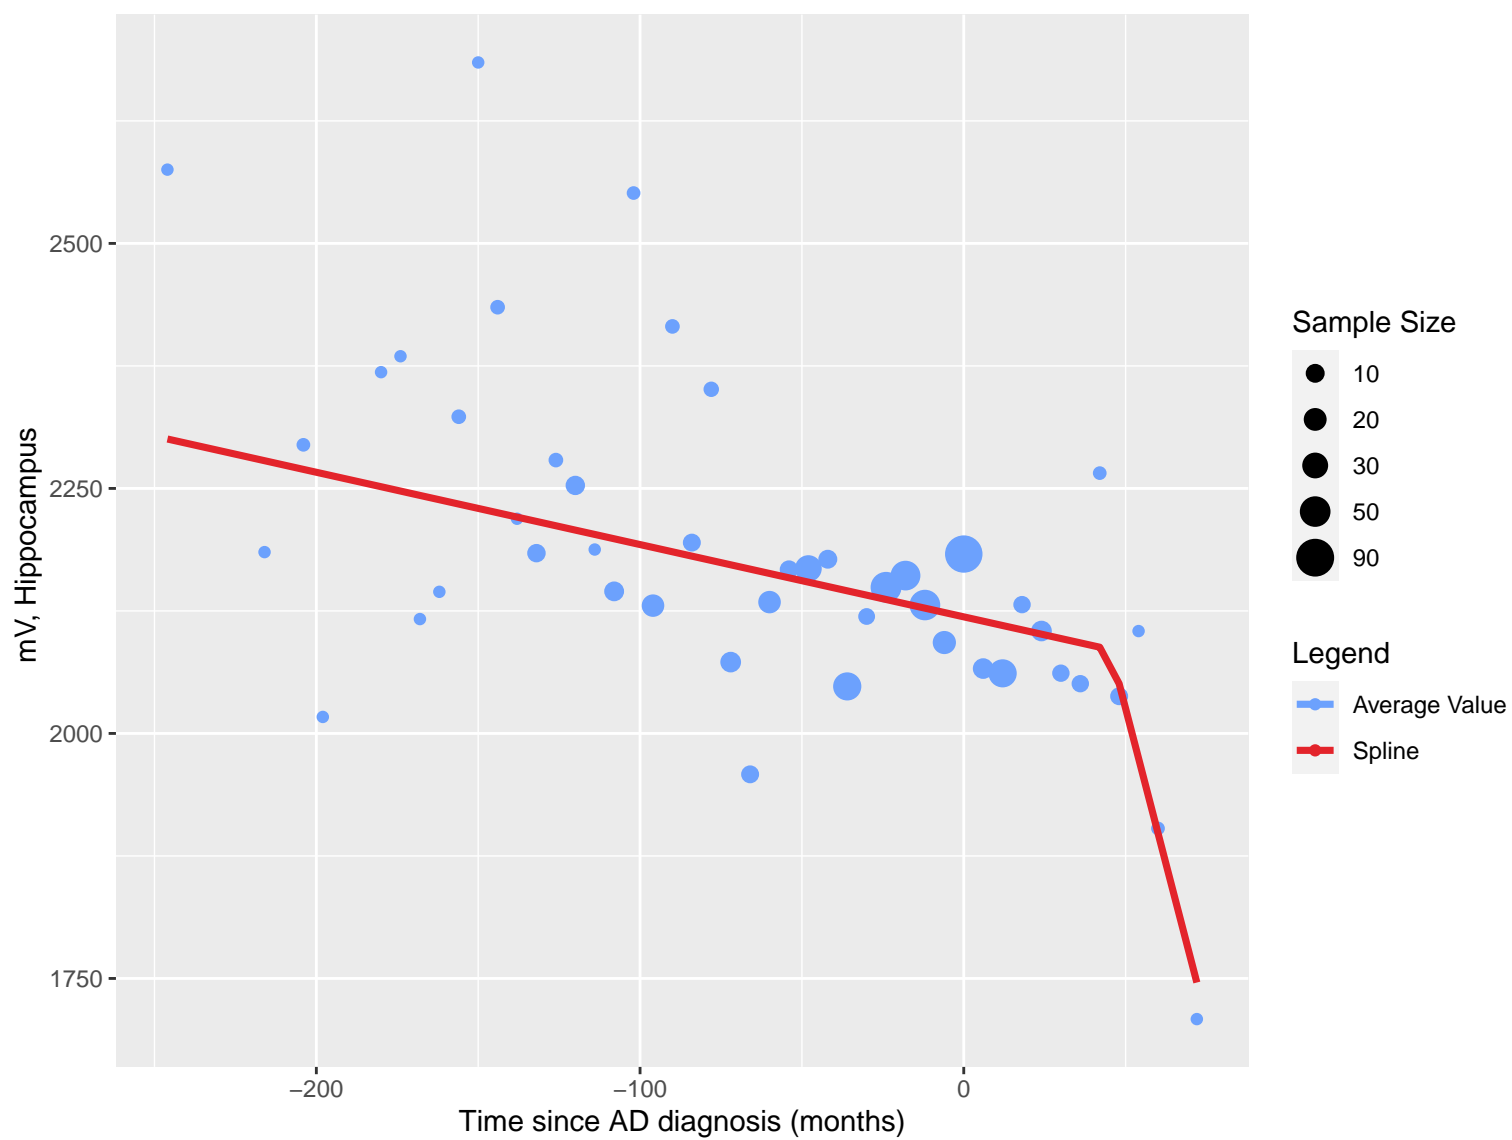

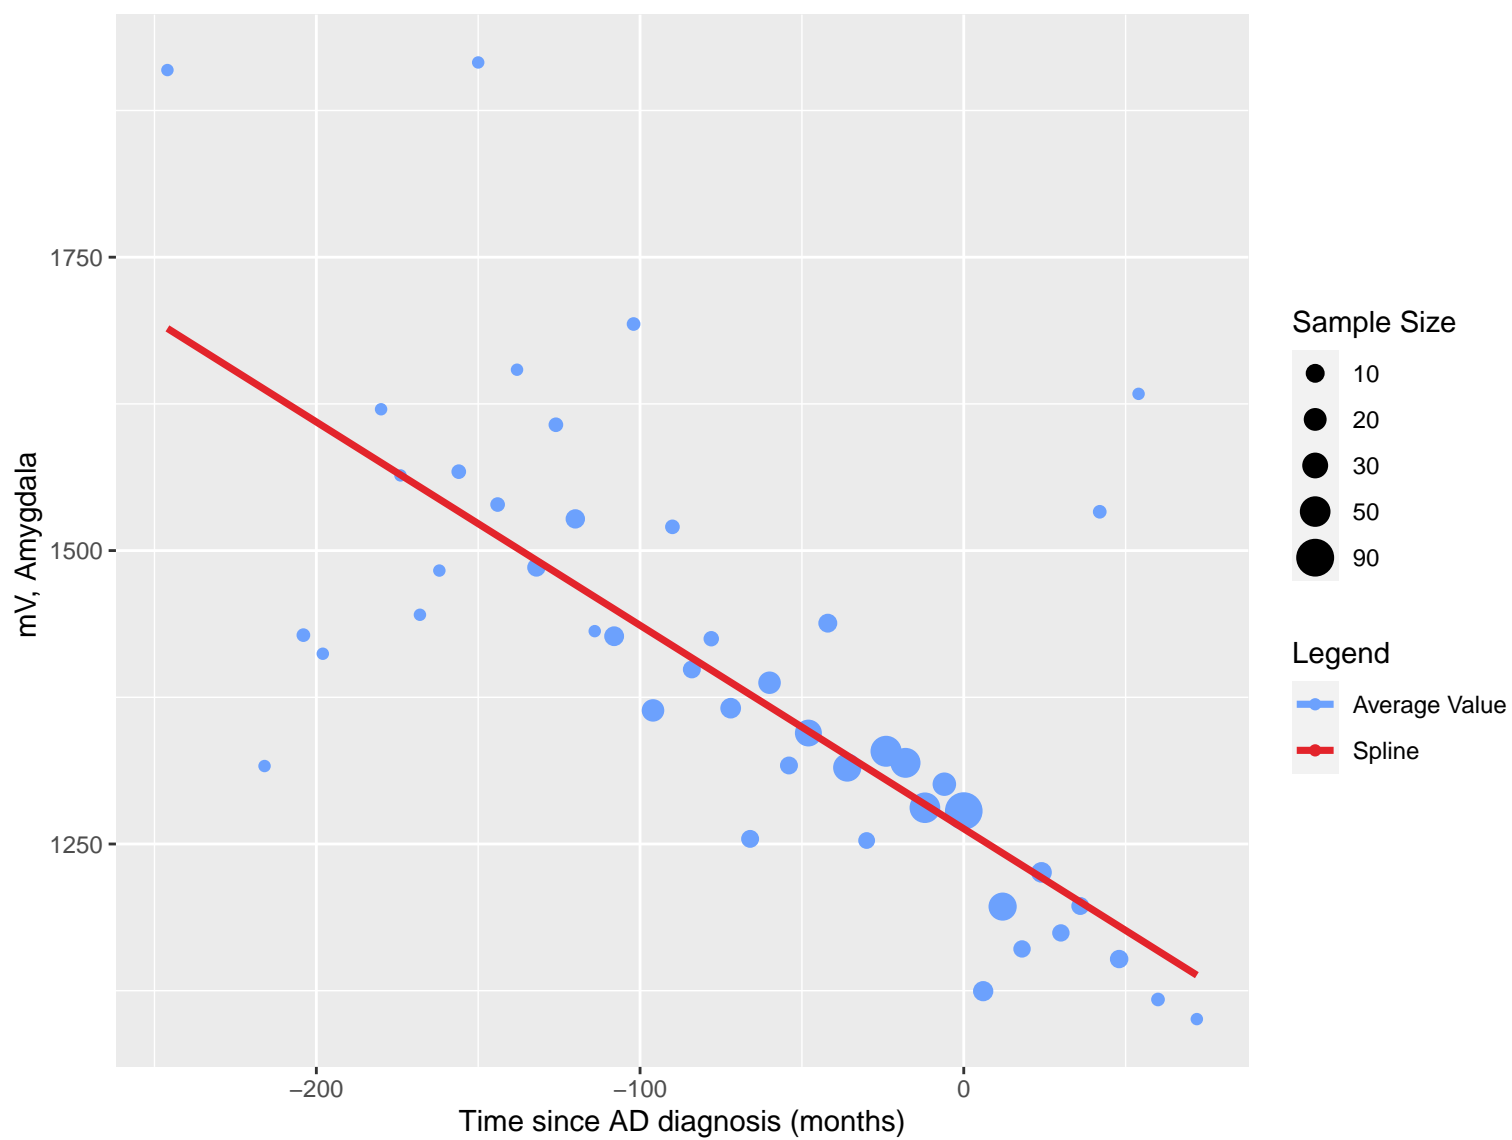



mV, Anterior temporal lobe, medial part

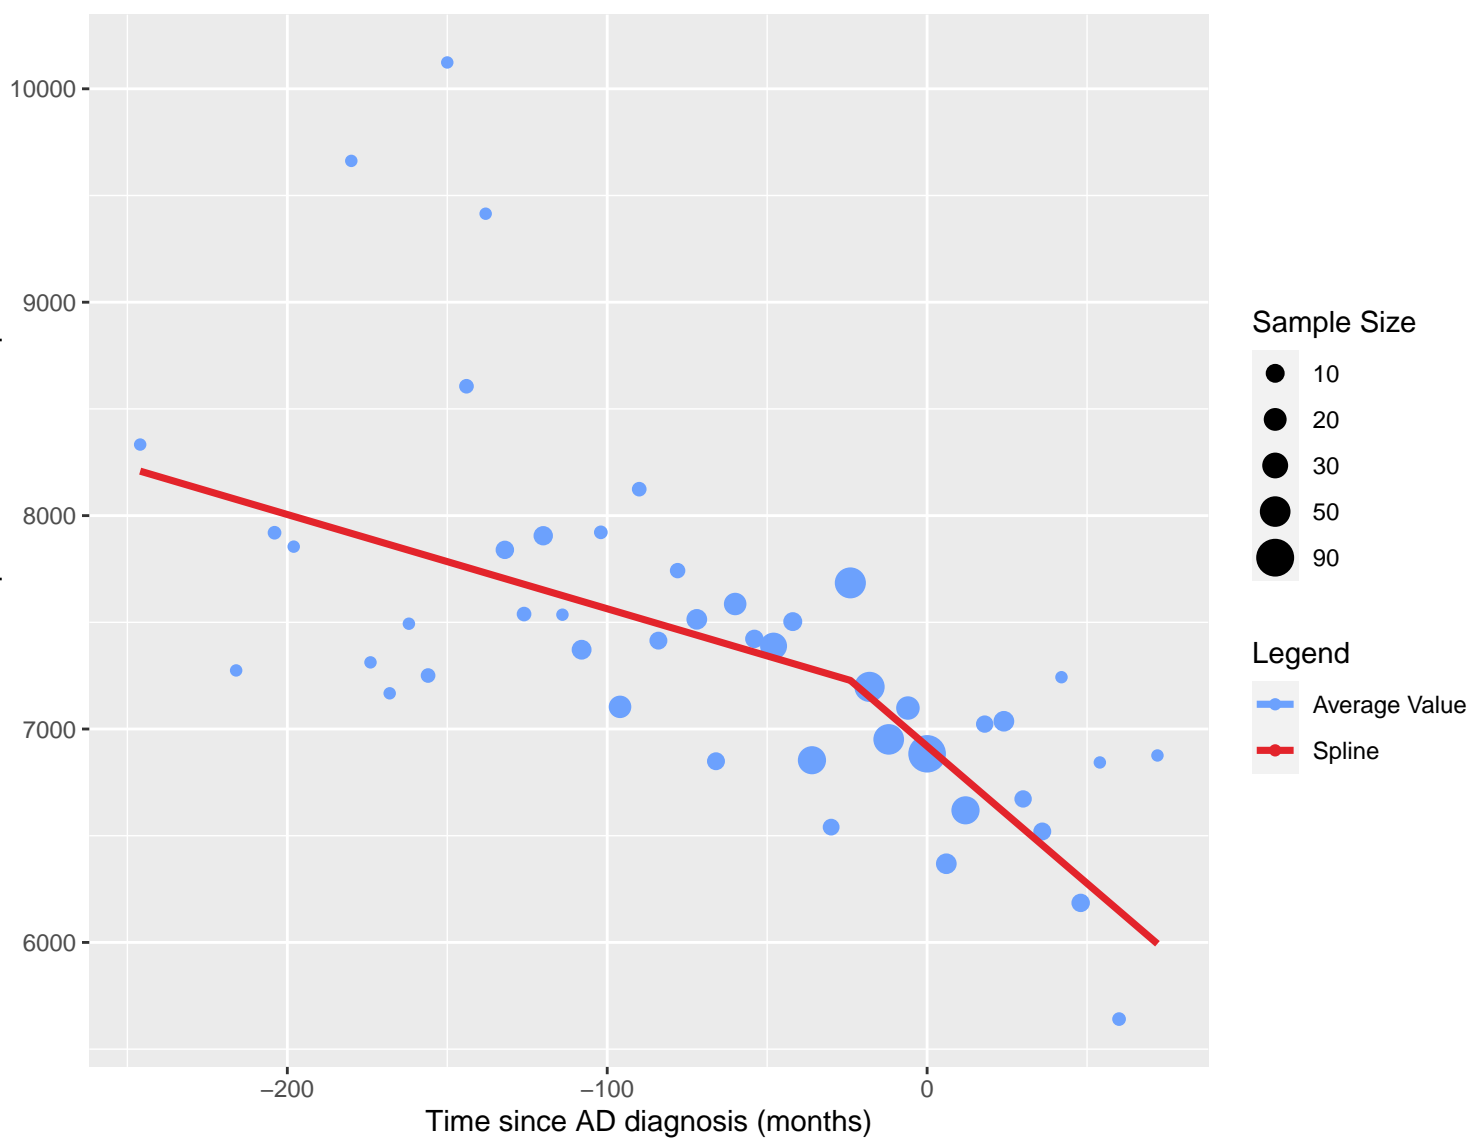

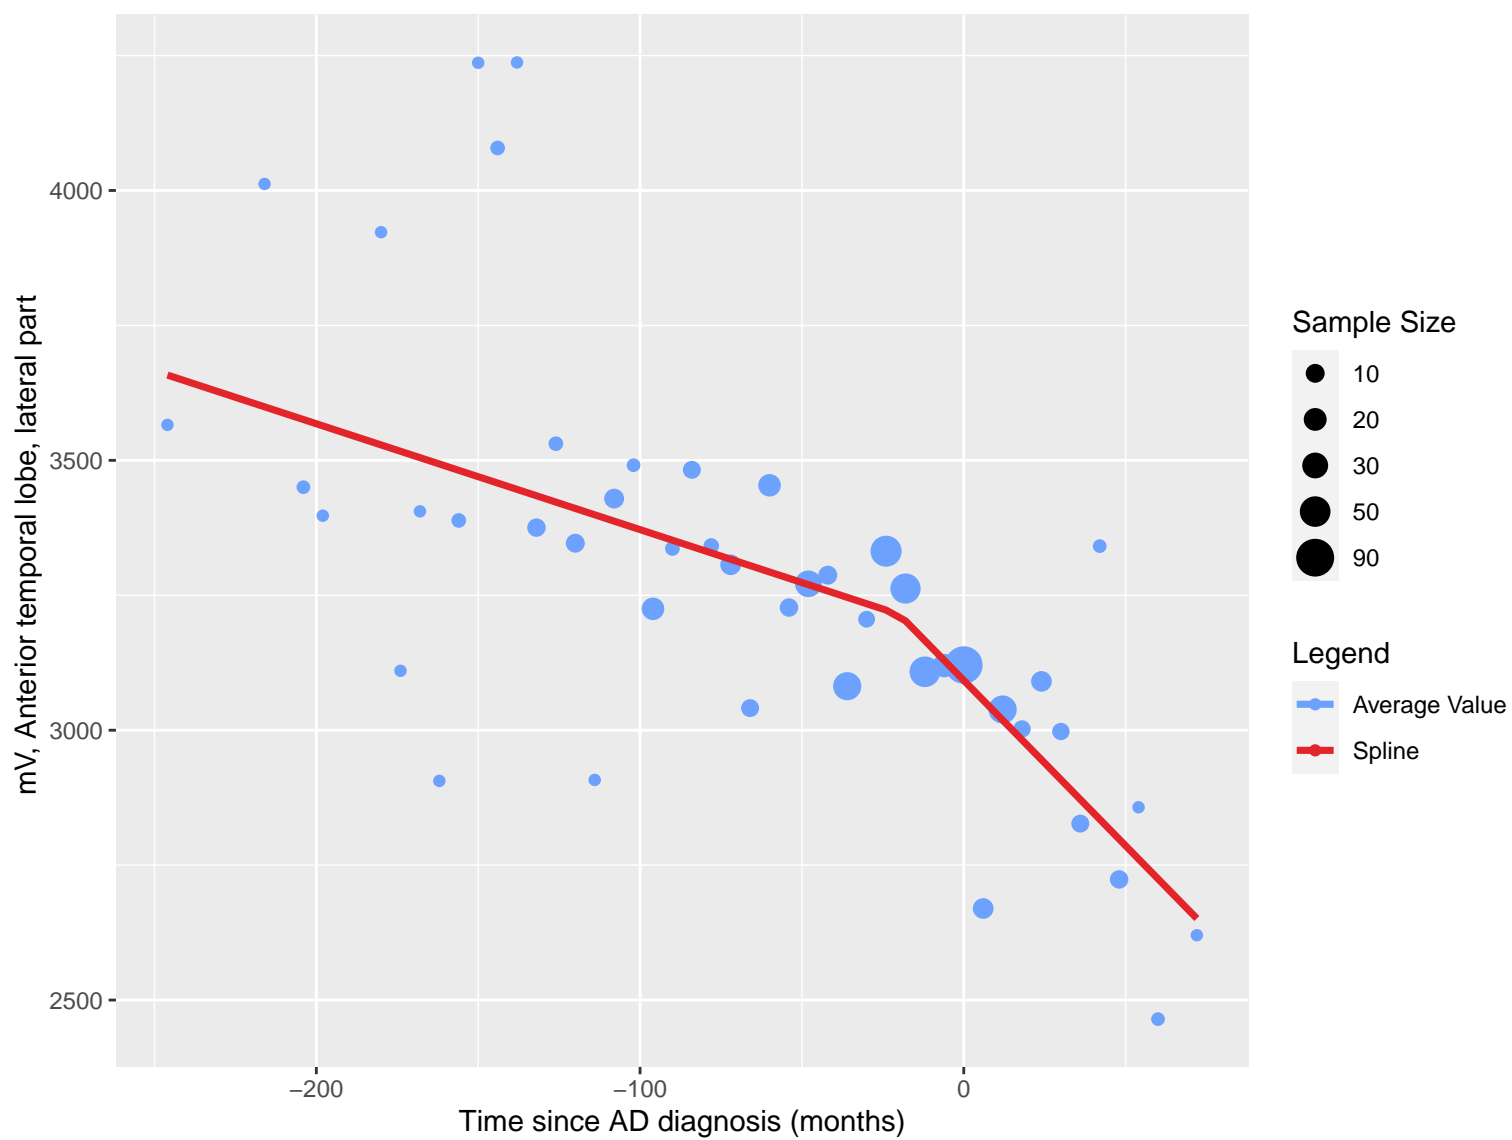

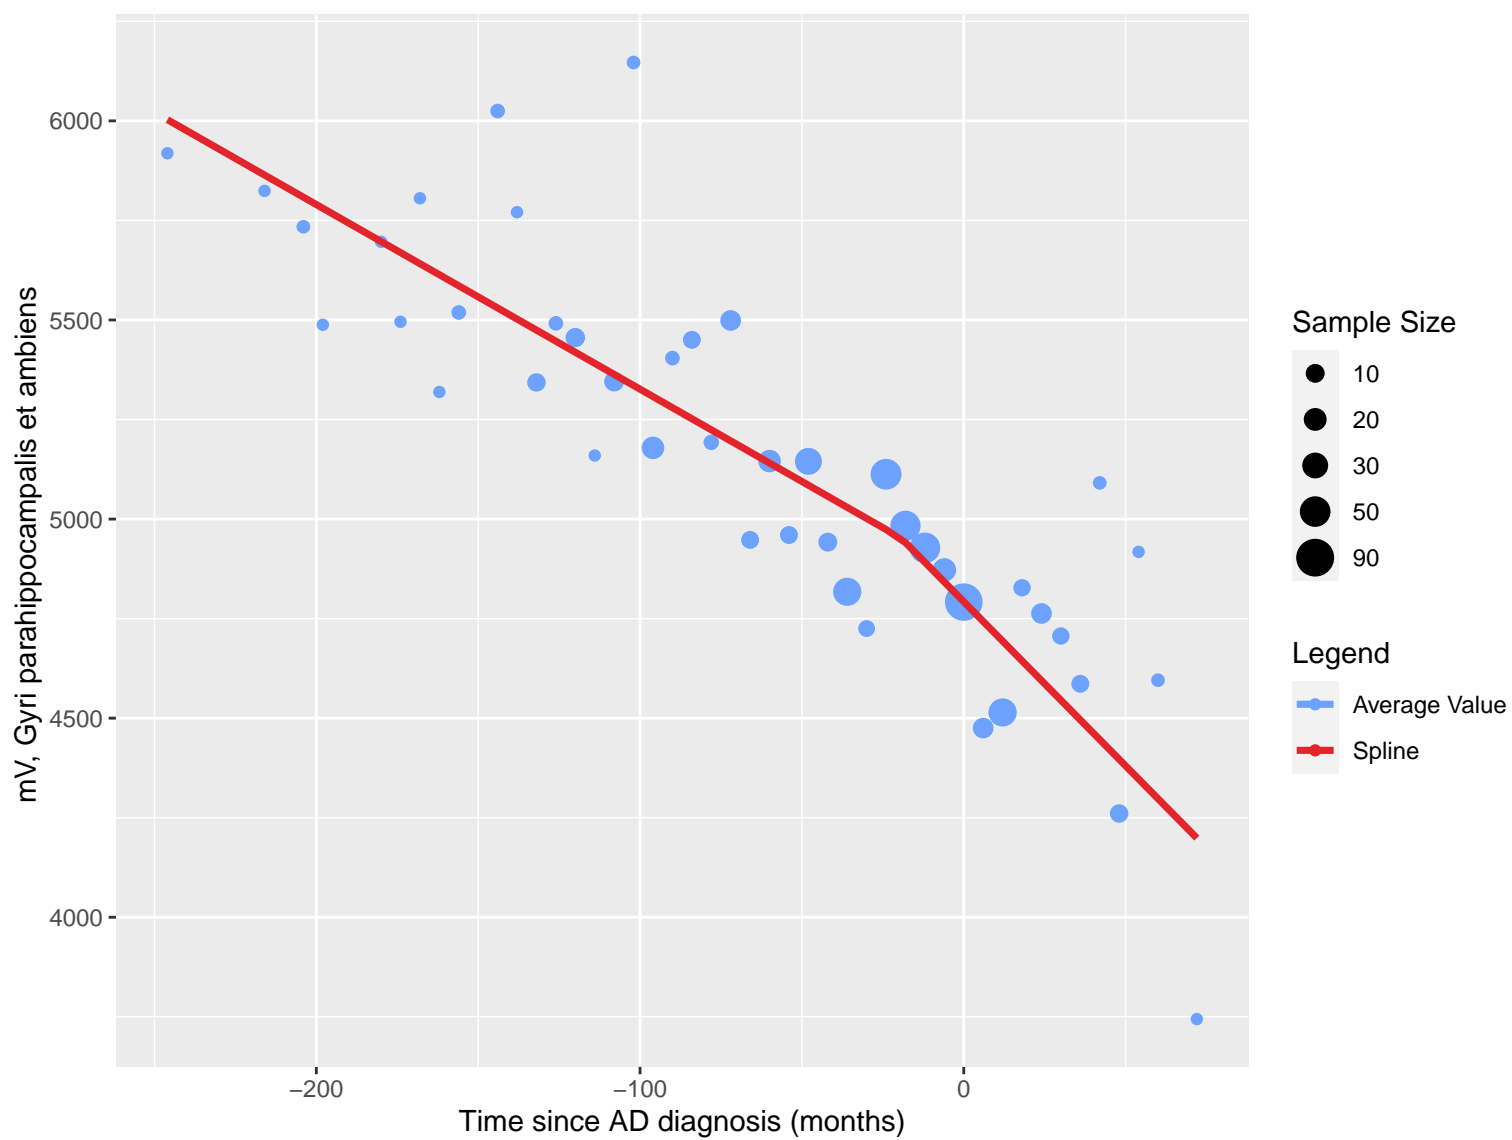

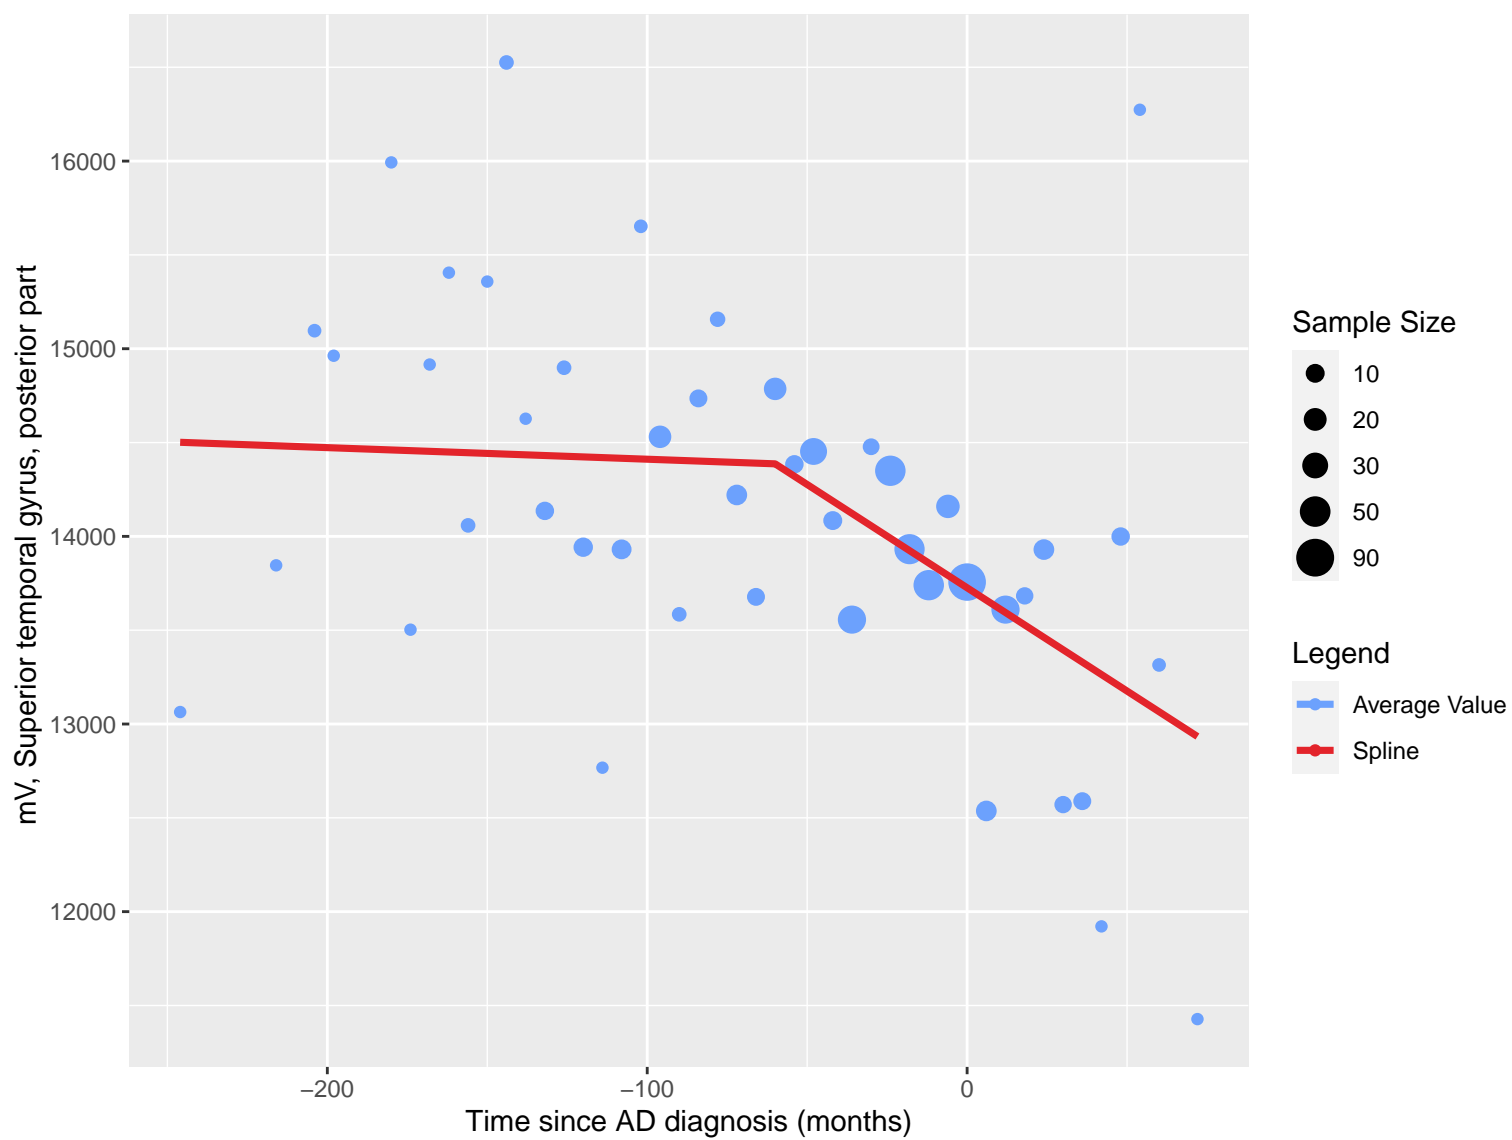

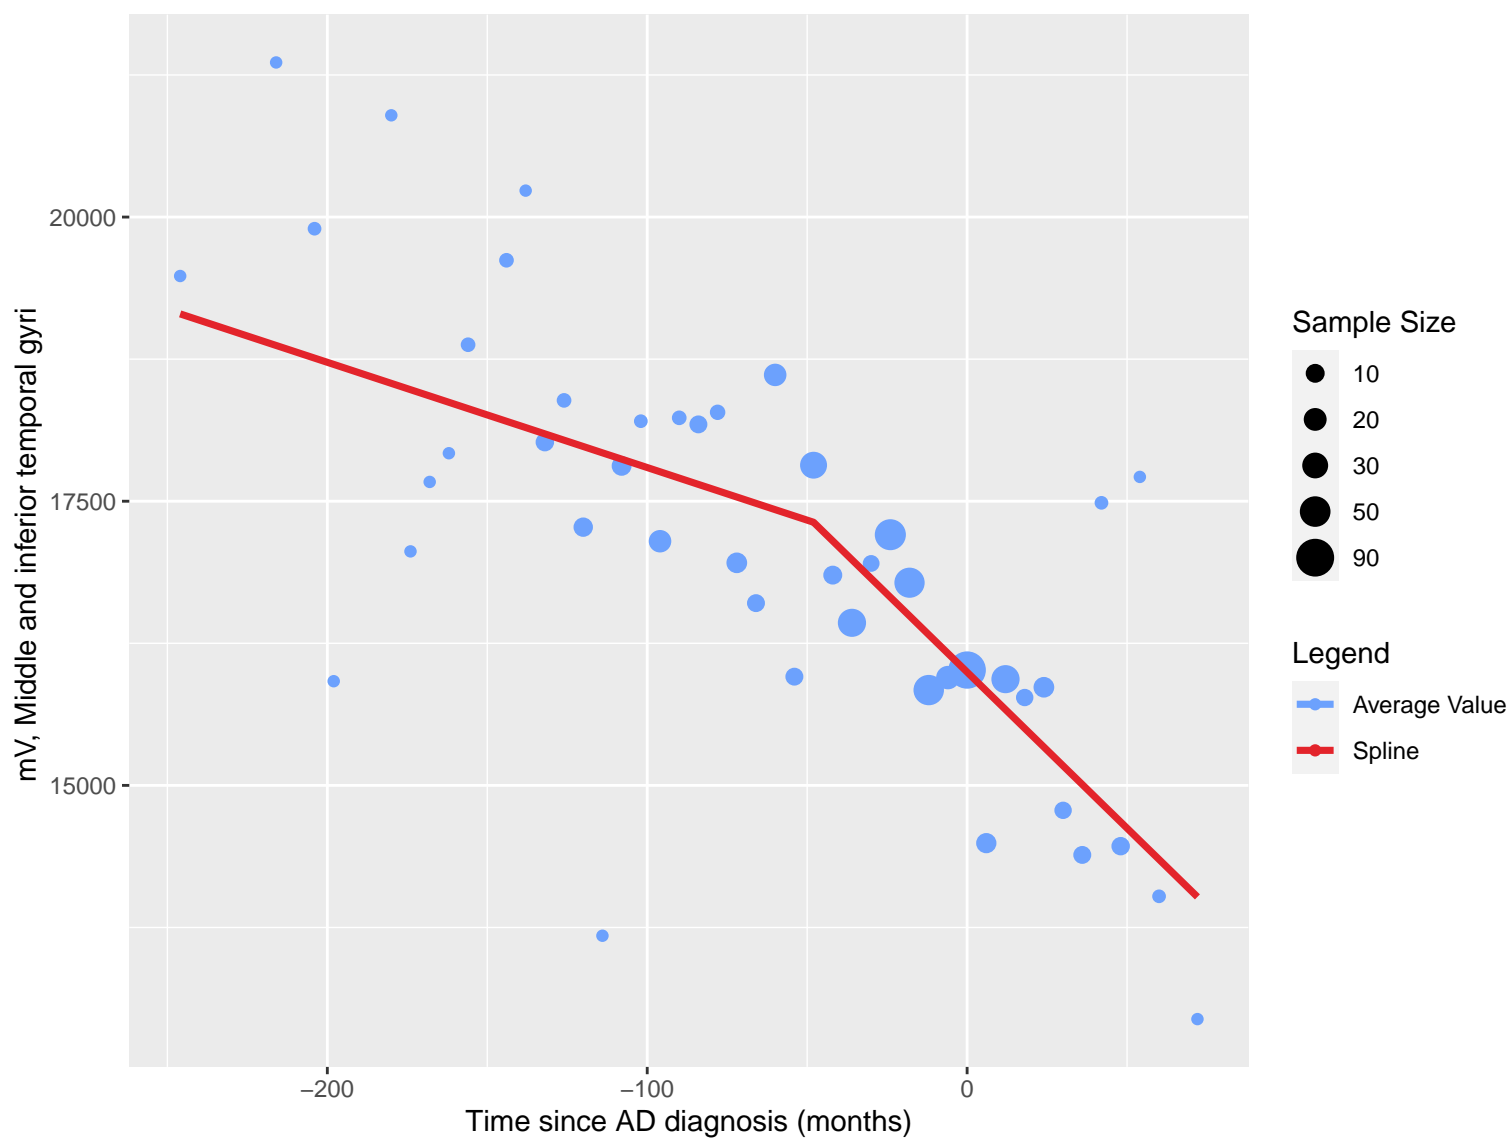

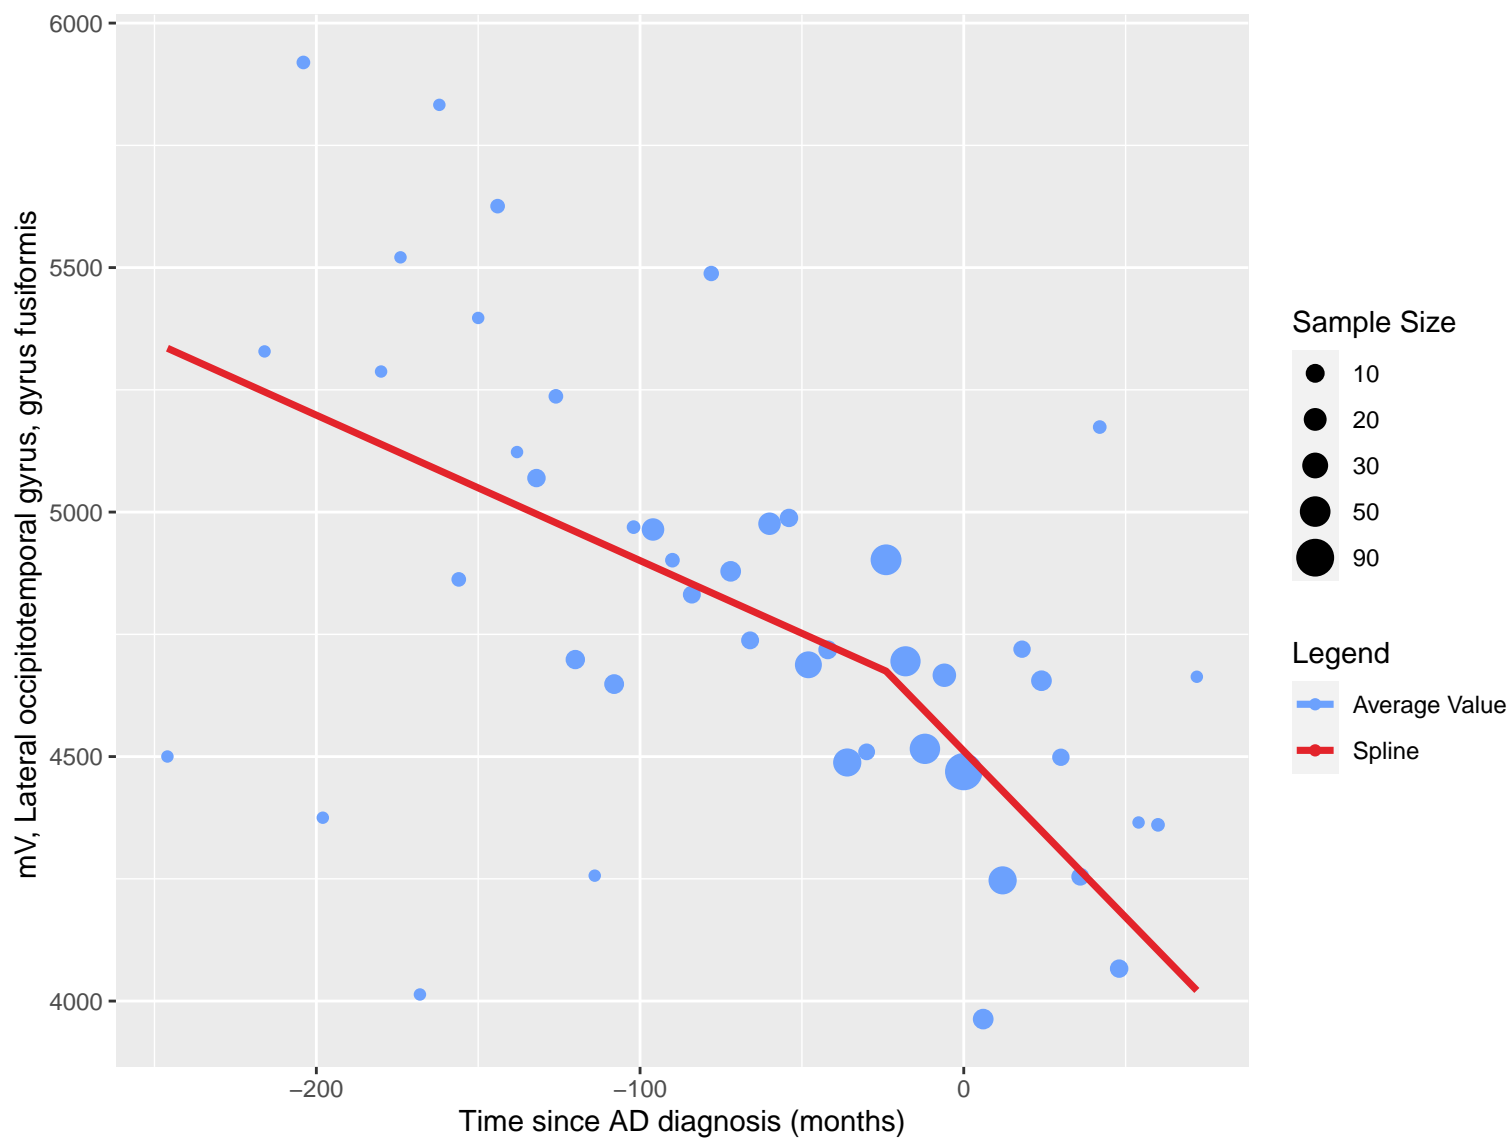

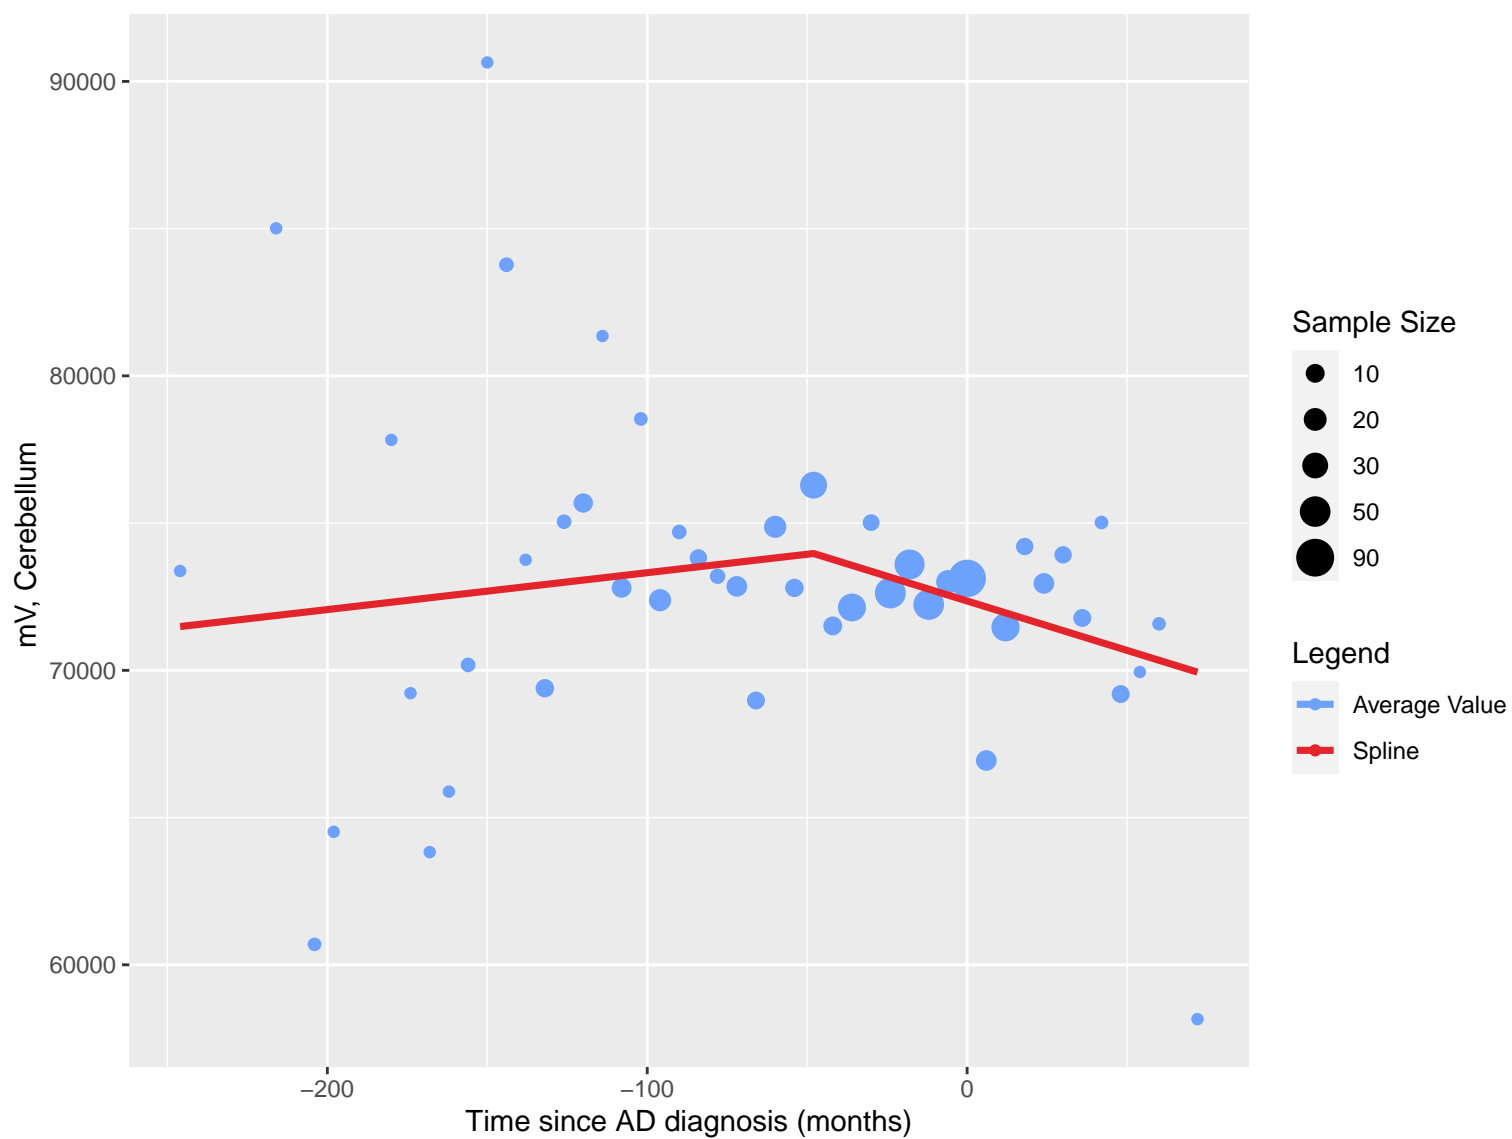

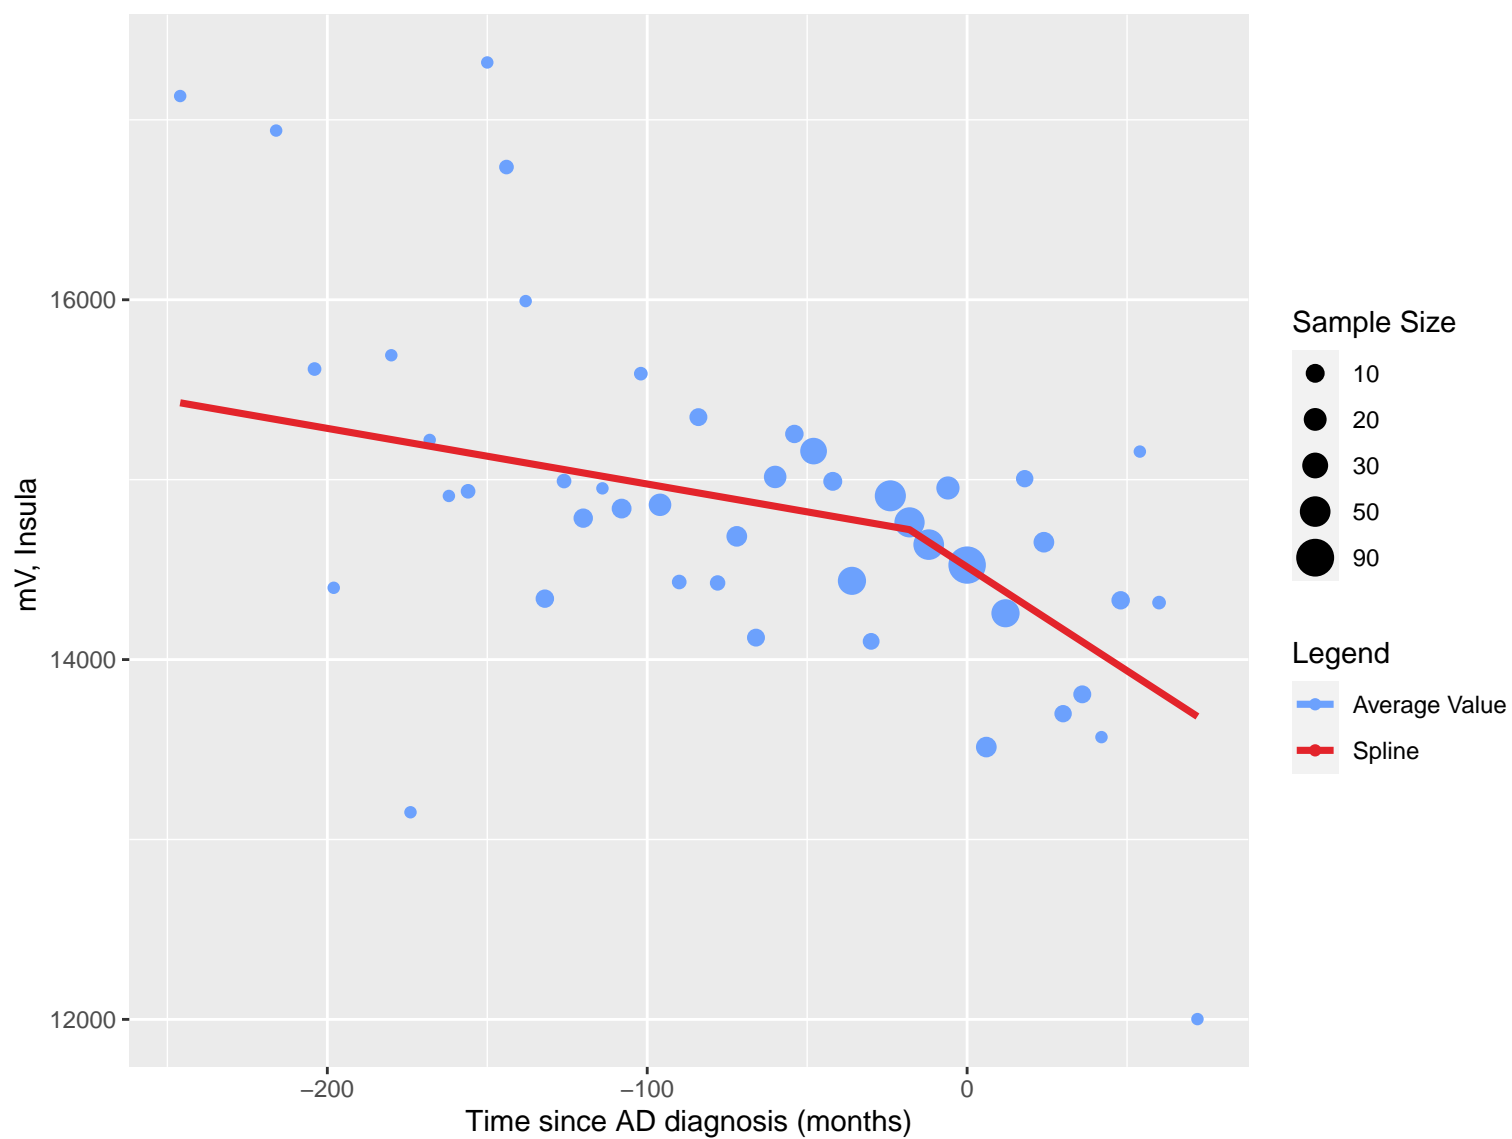



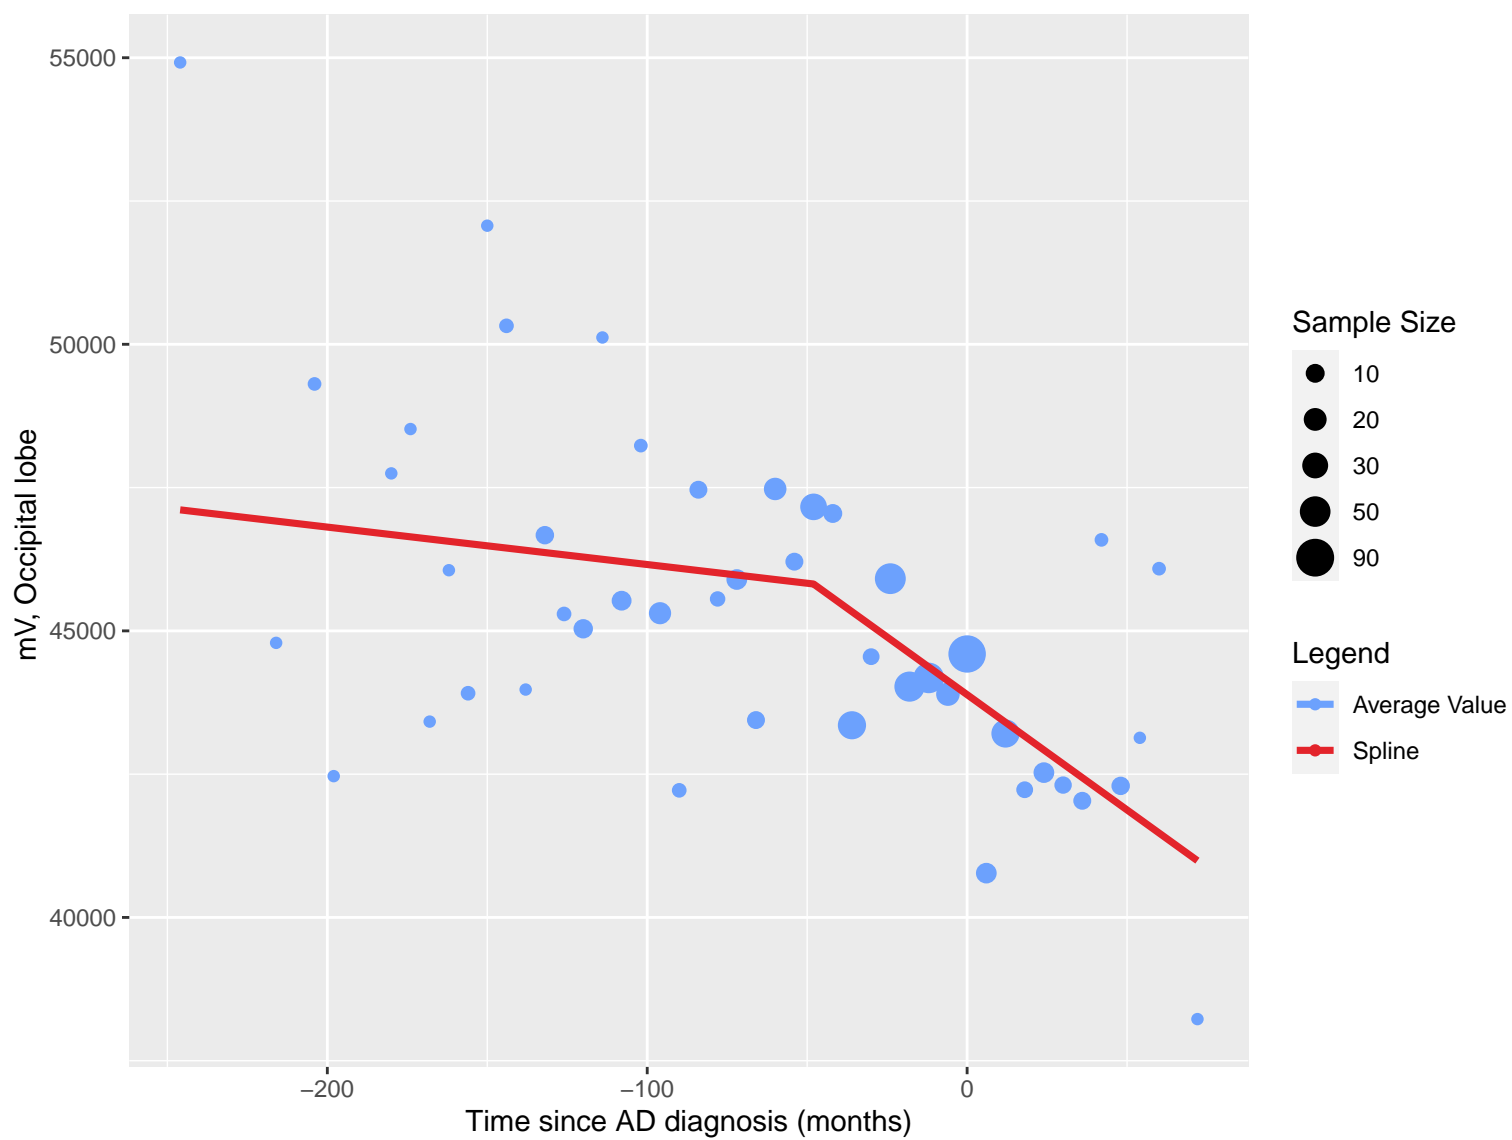

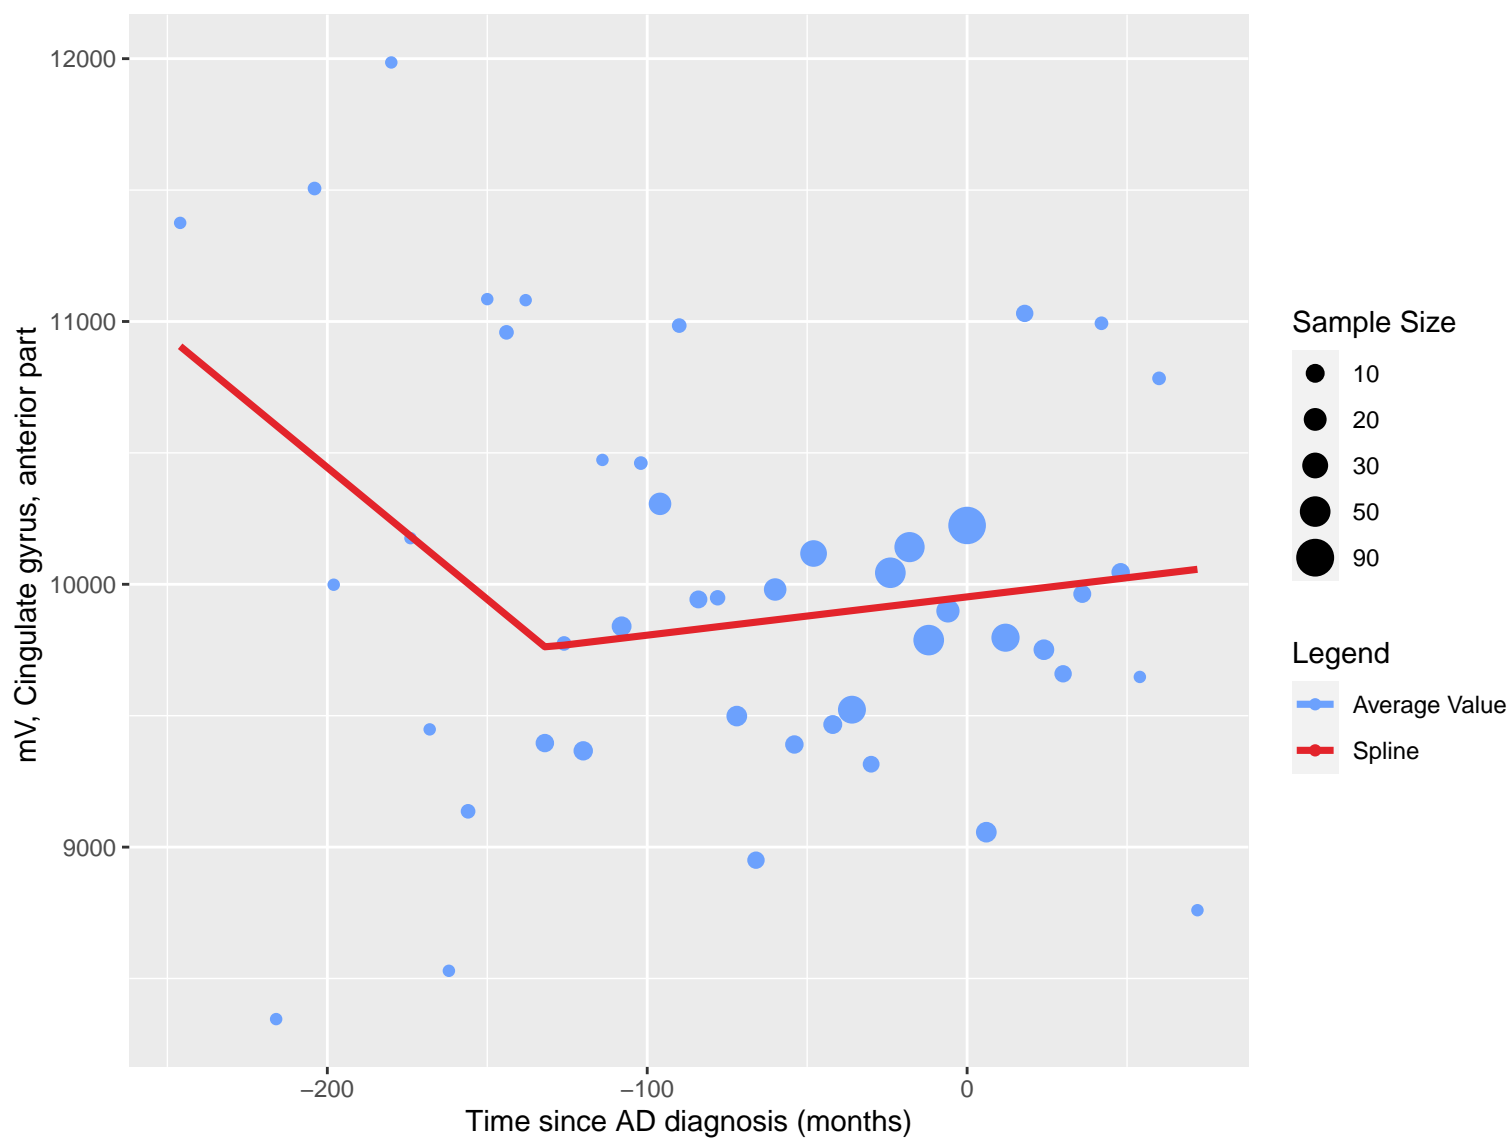

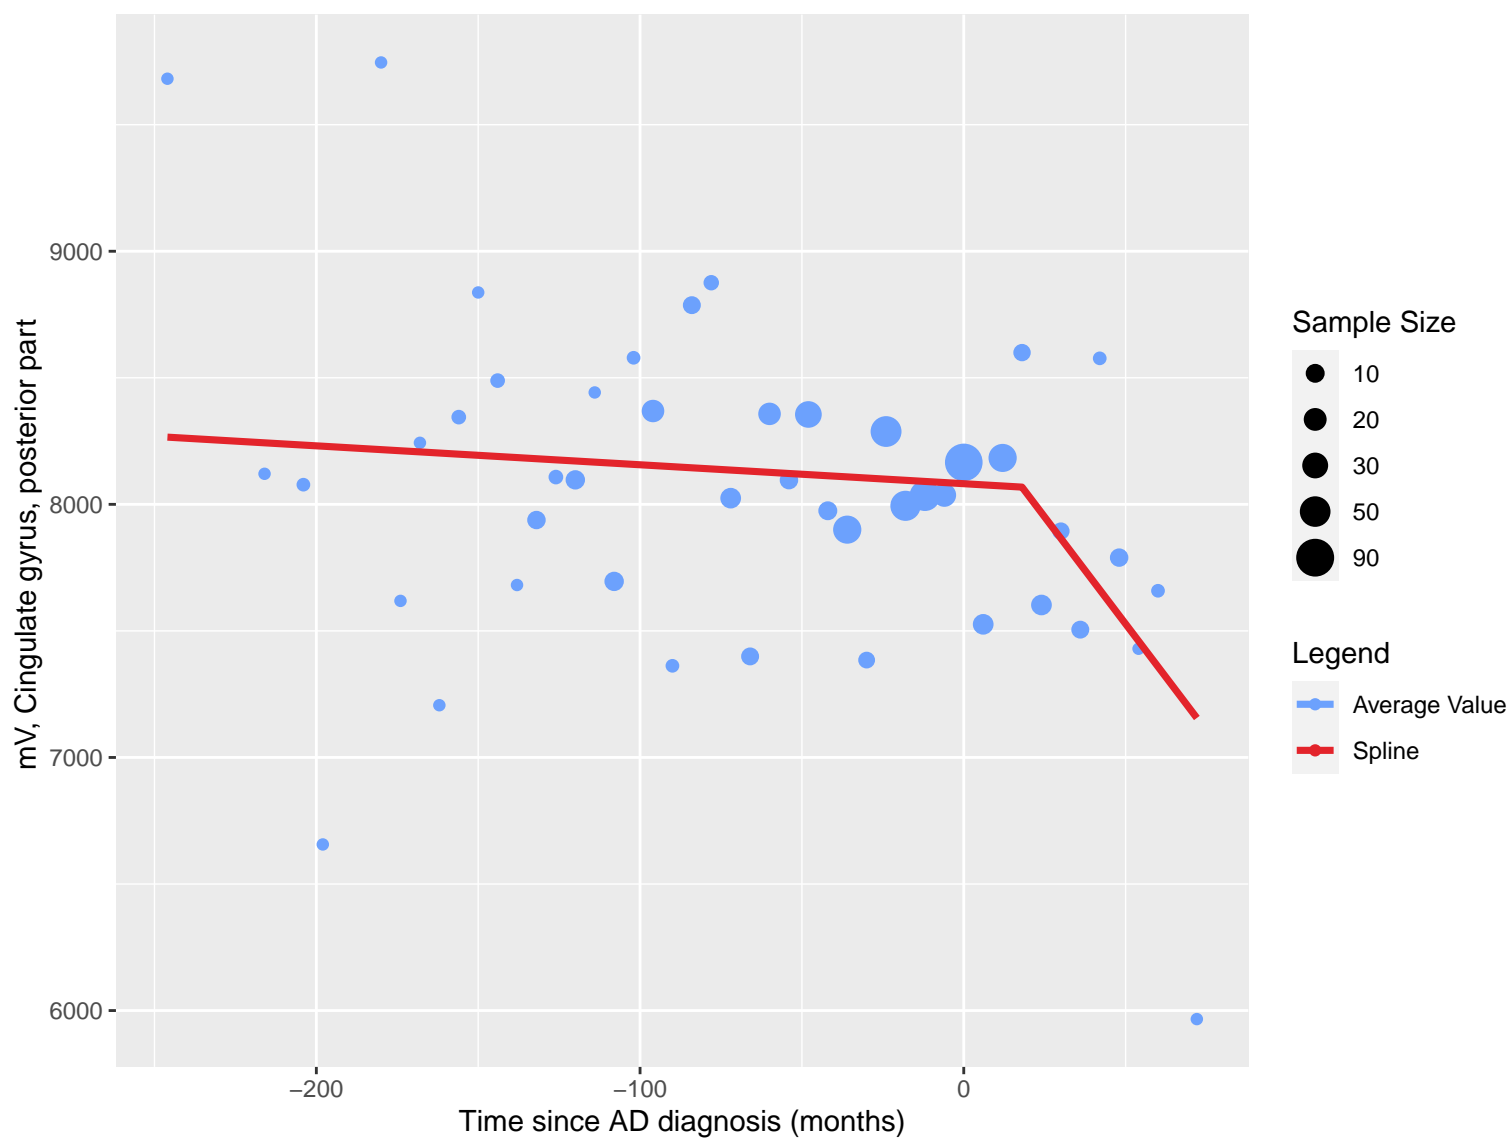

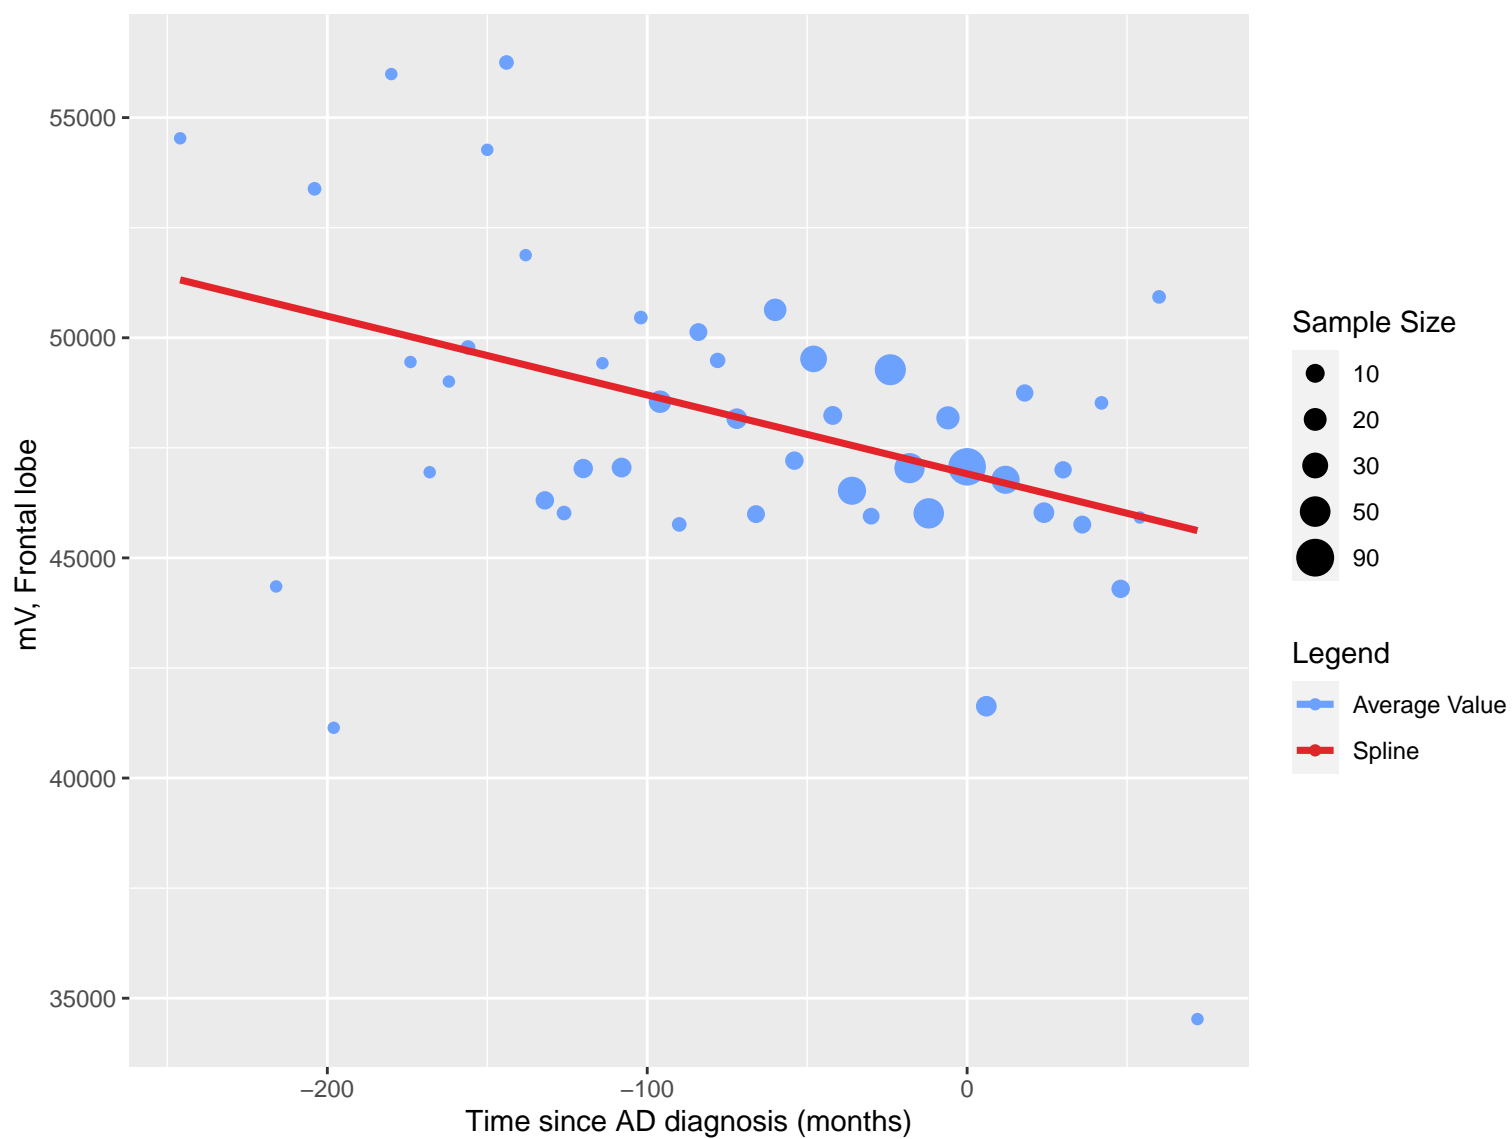

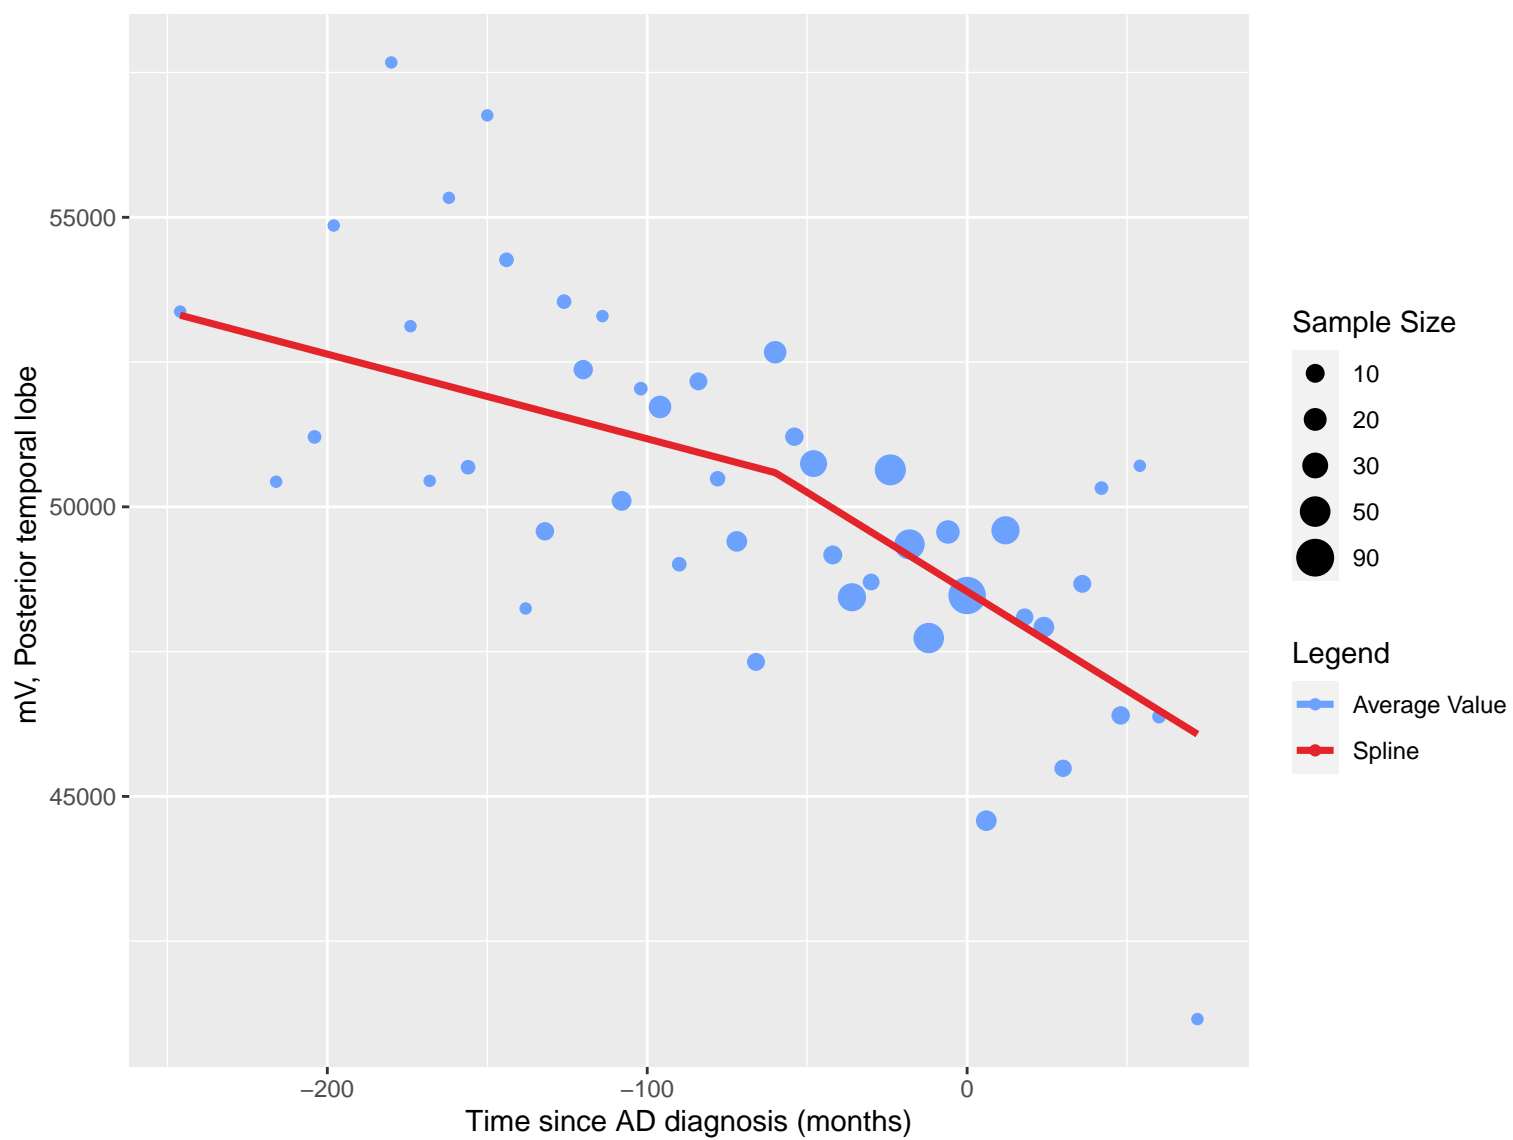

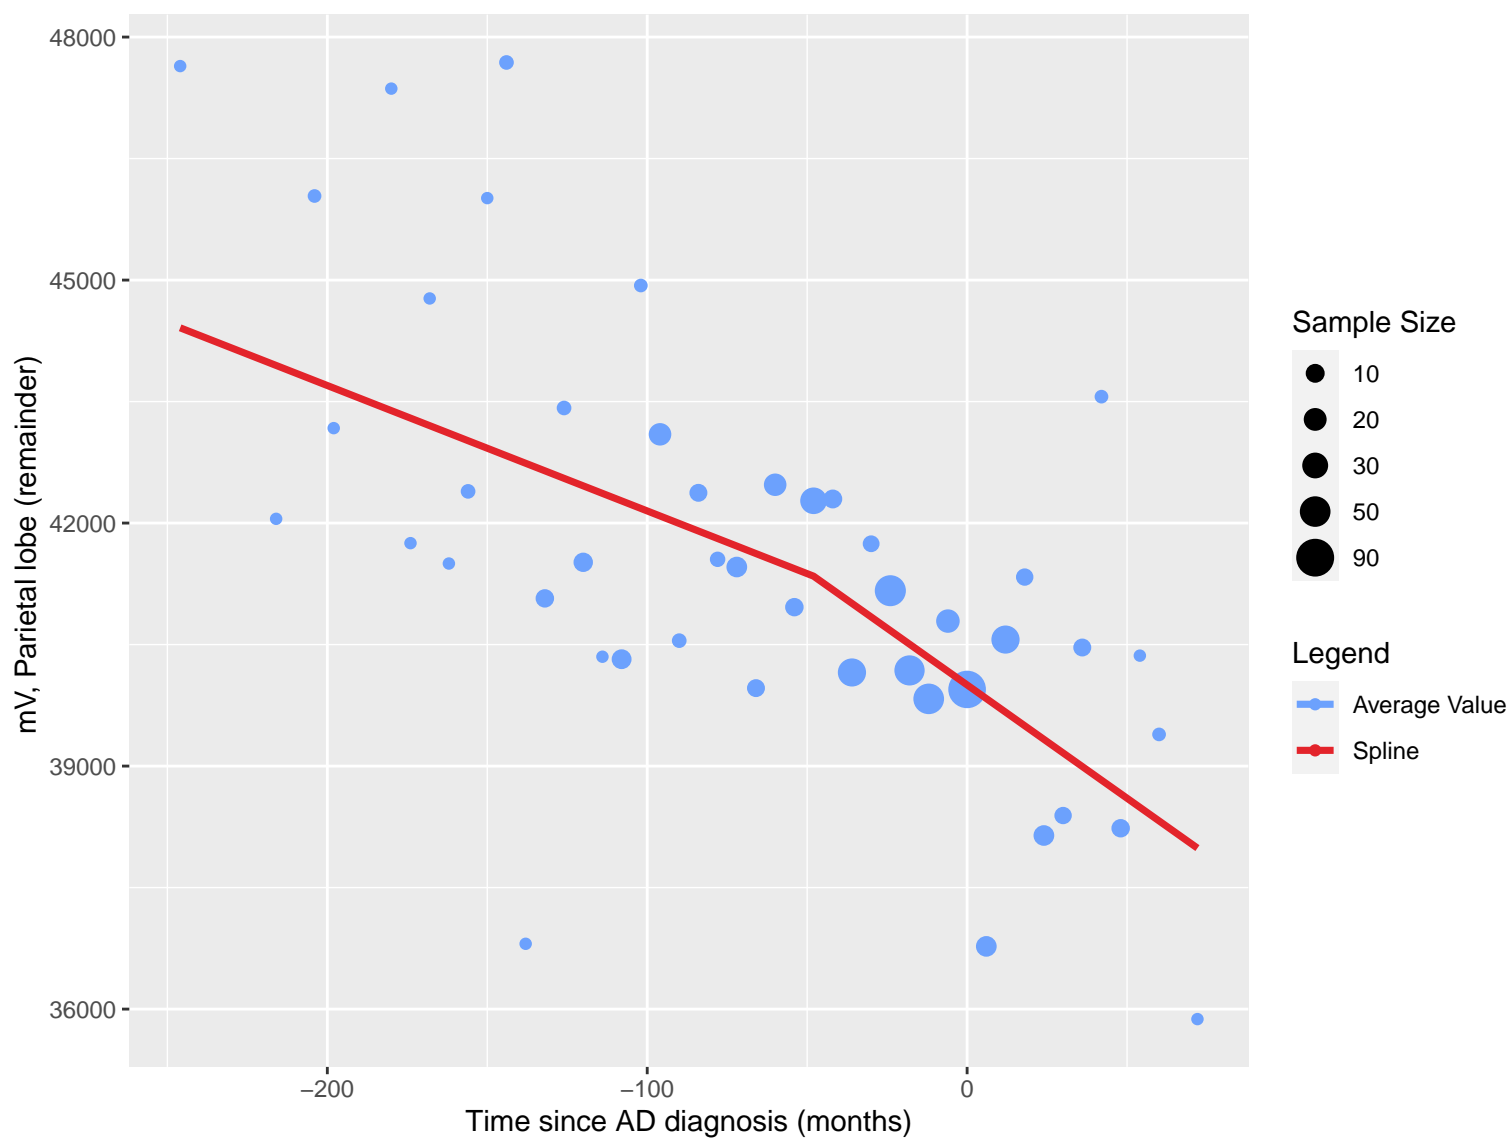

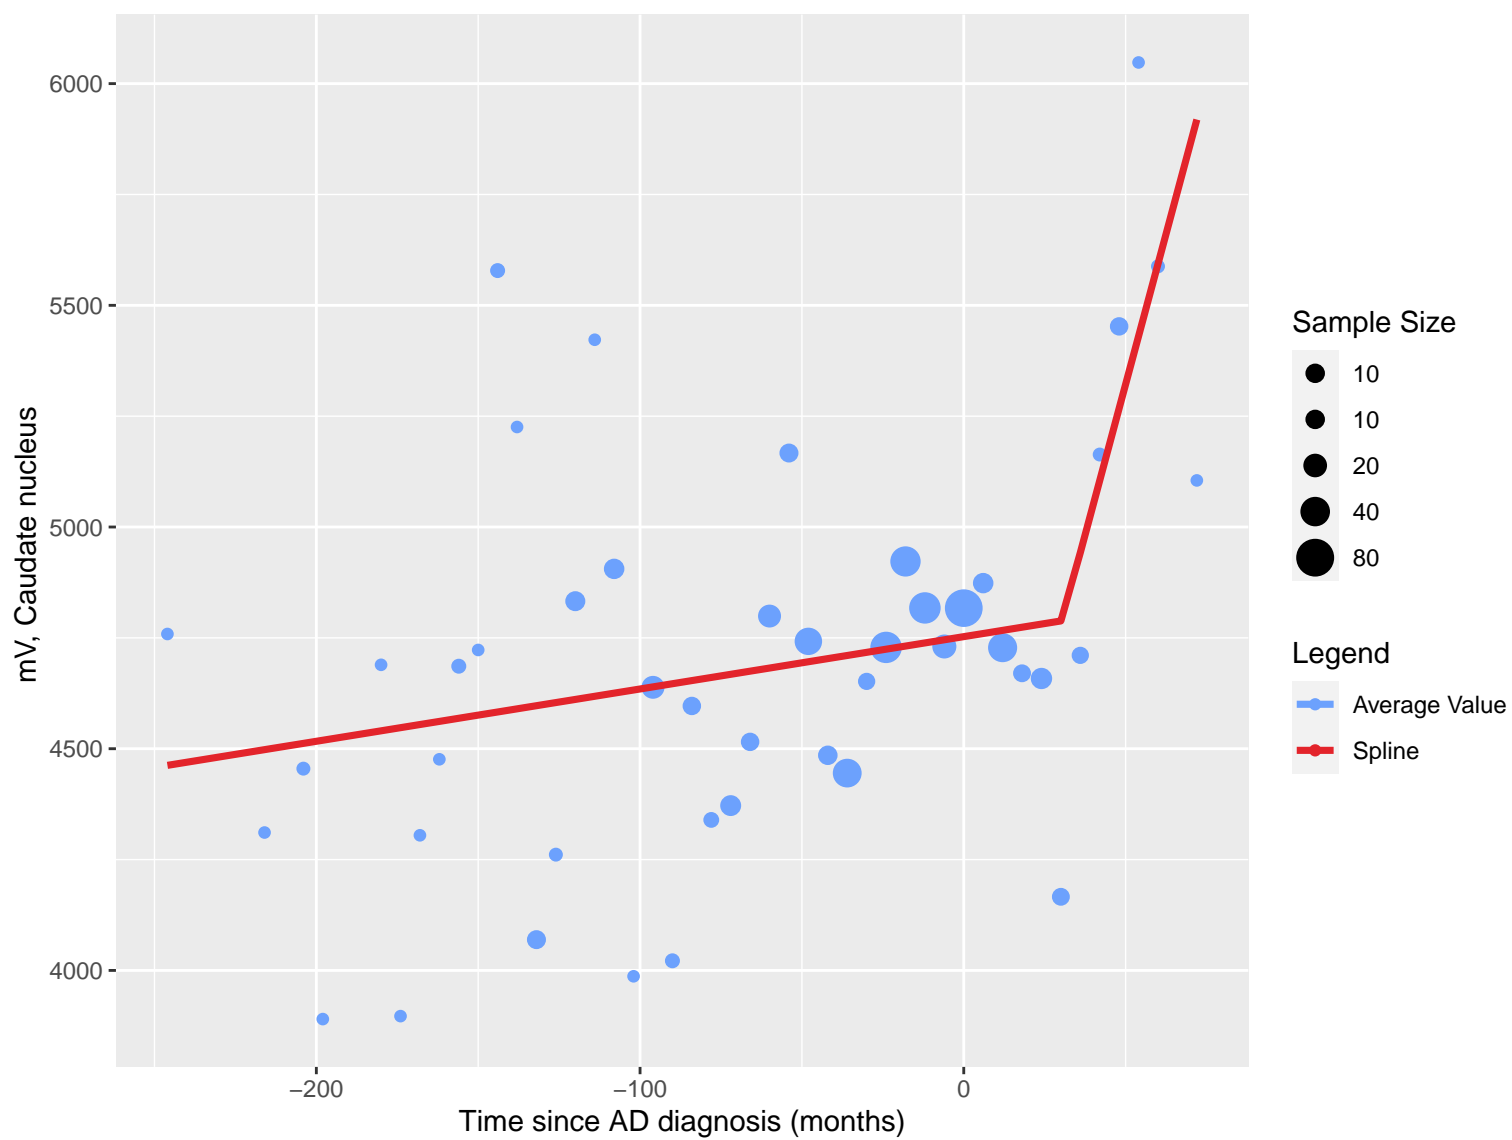

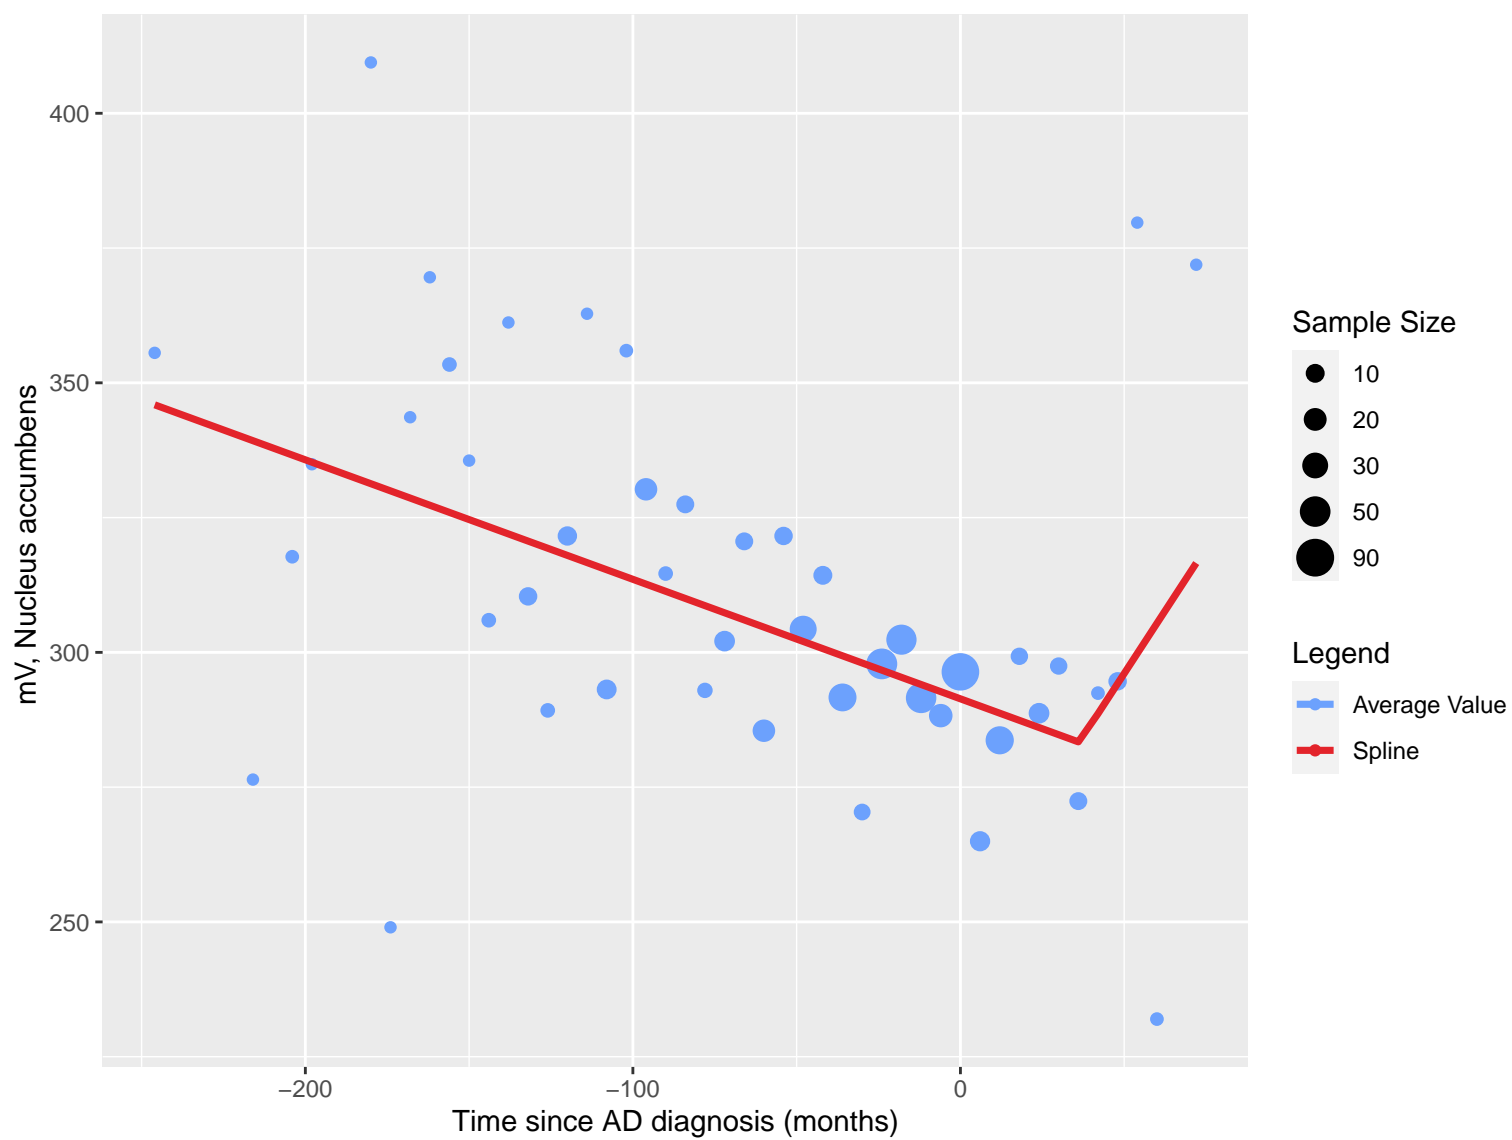



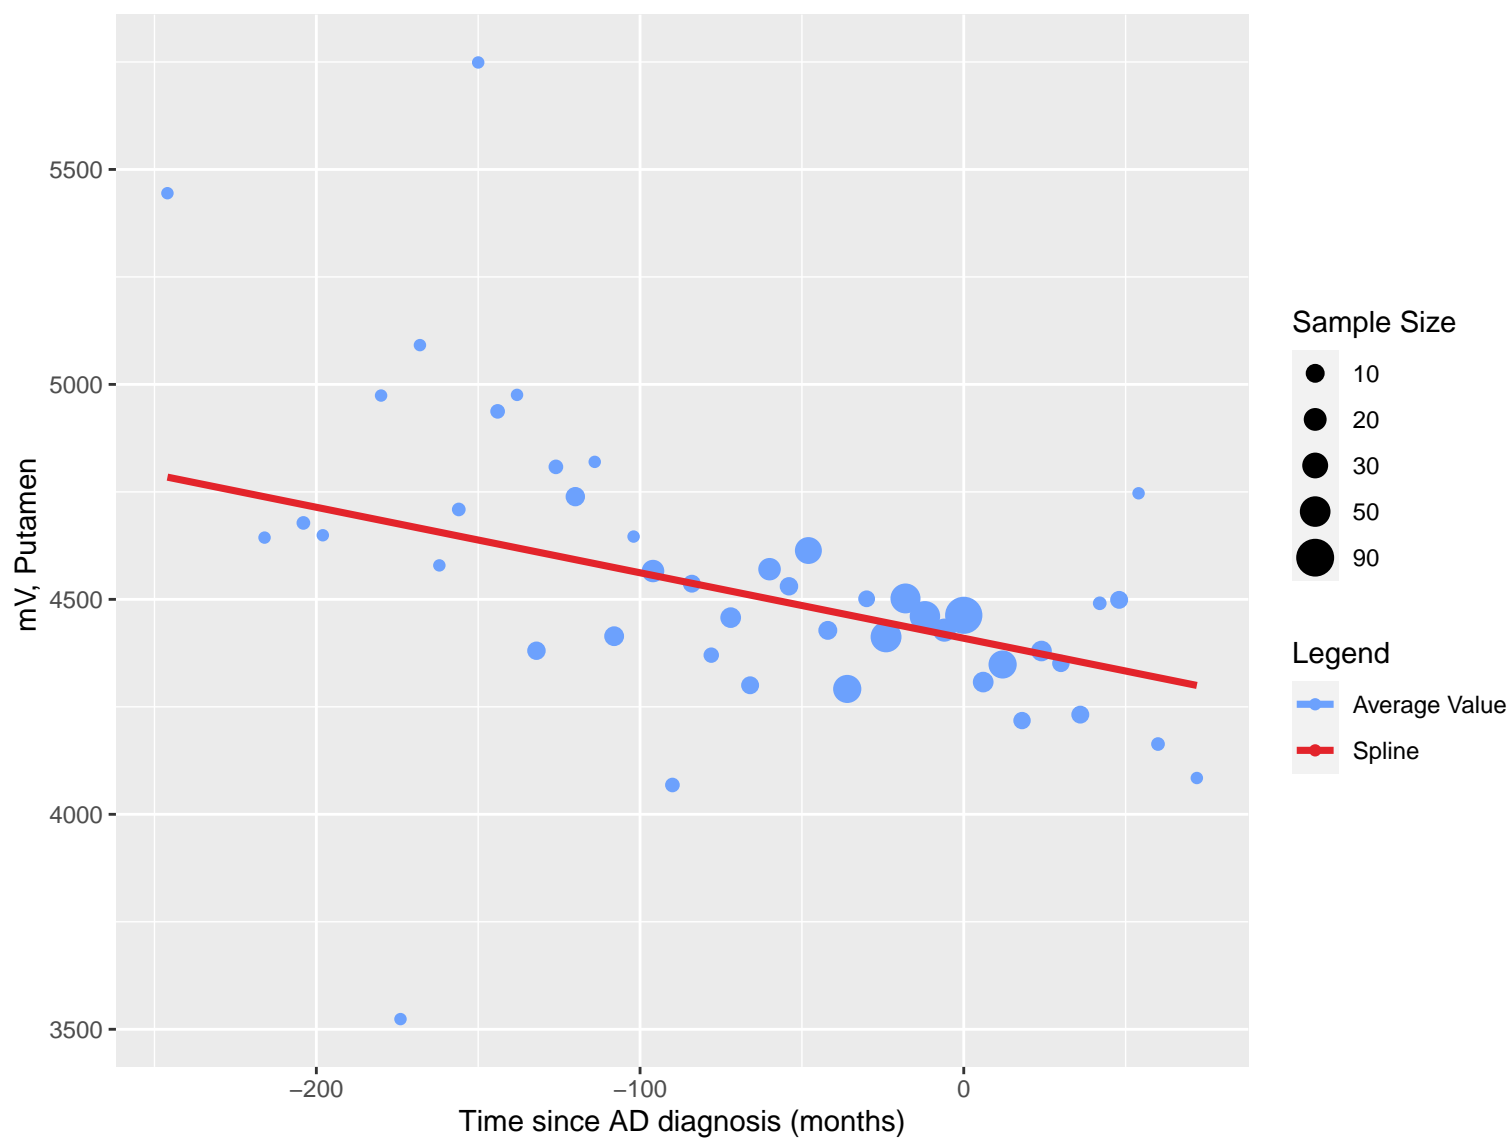

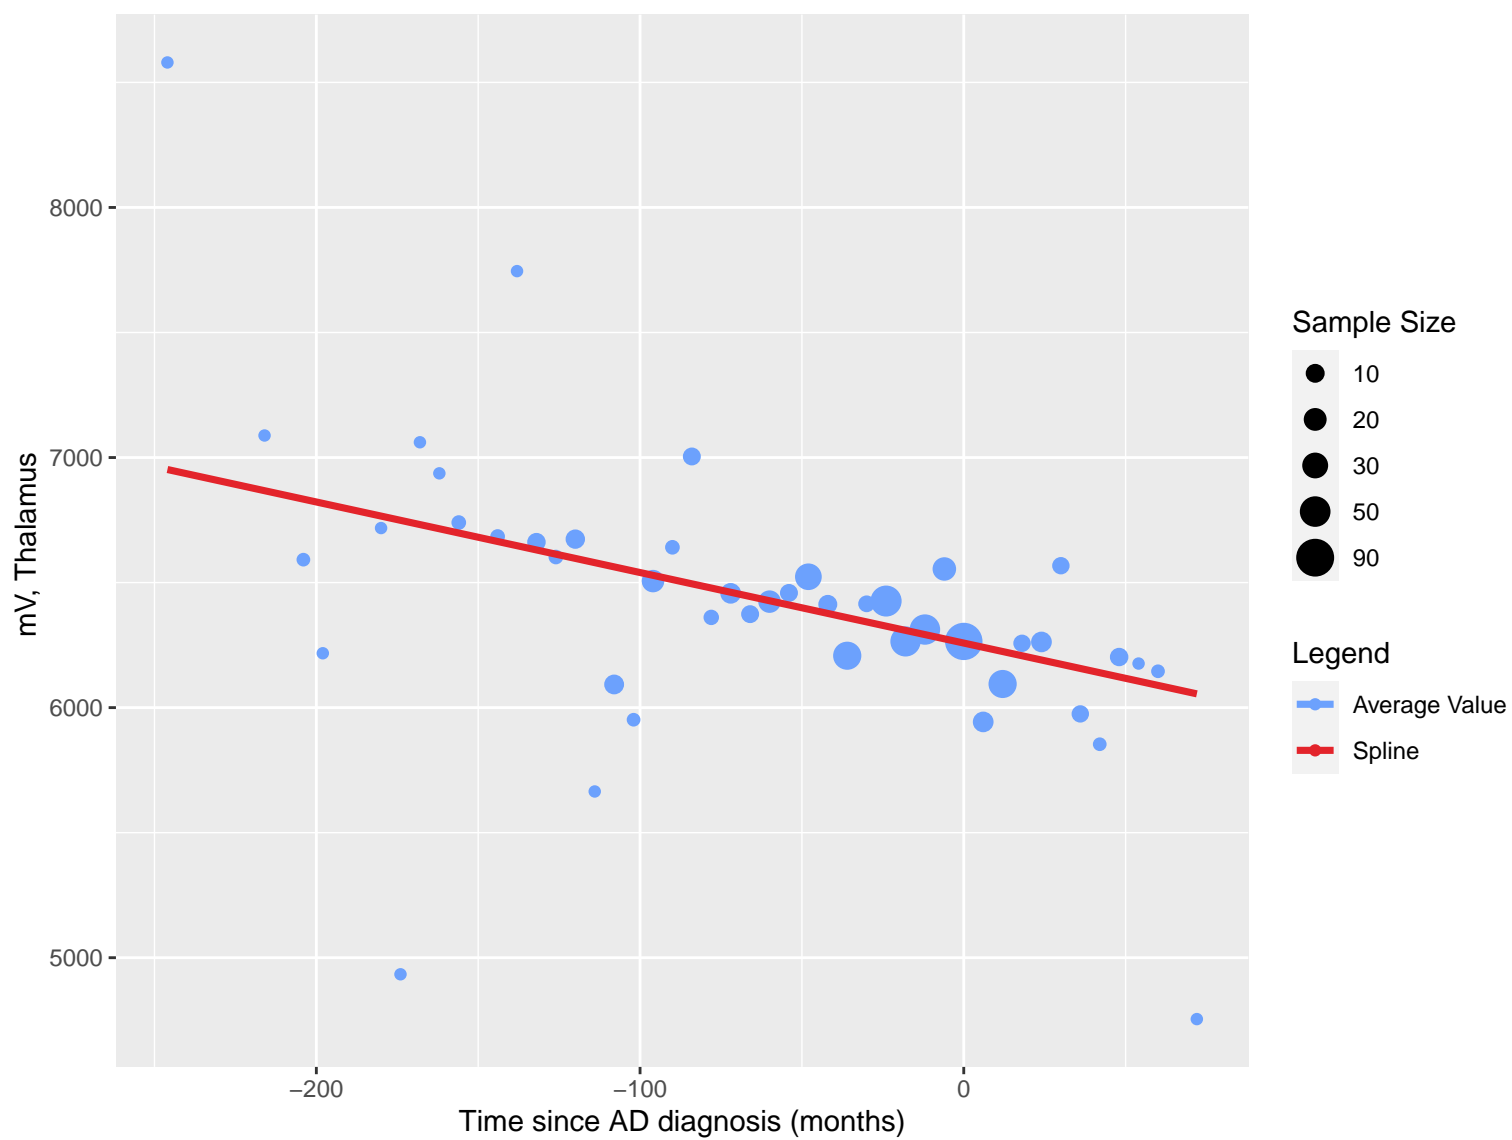

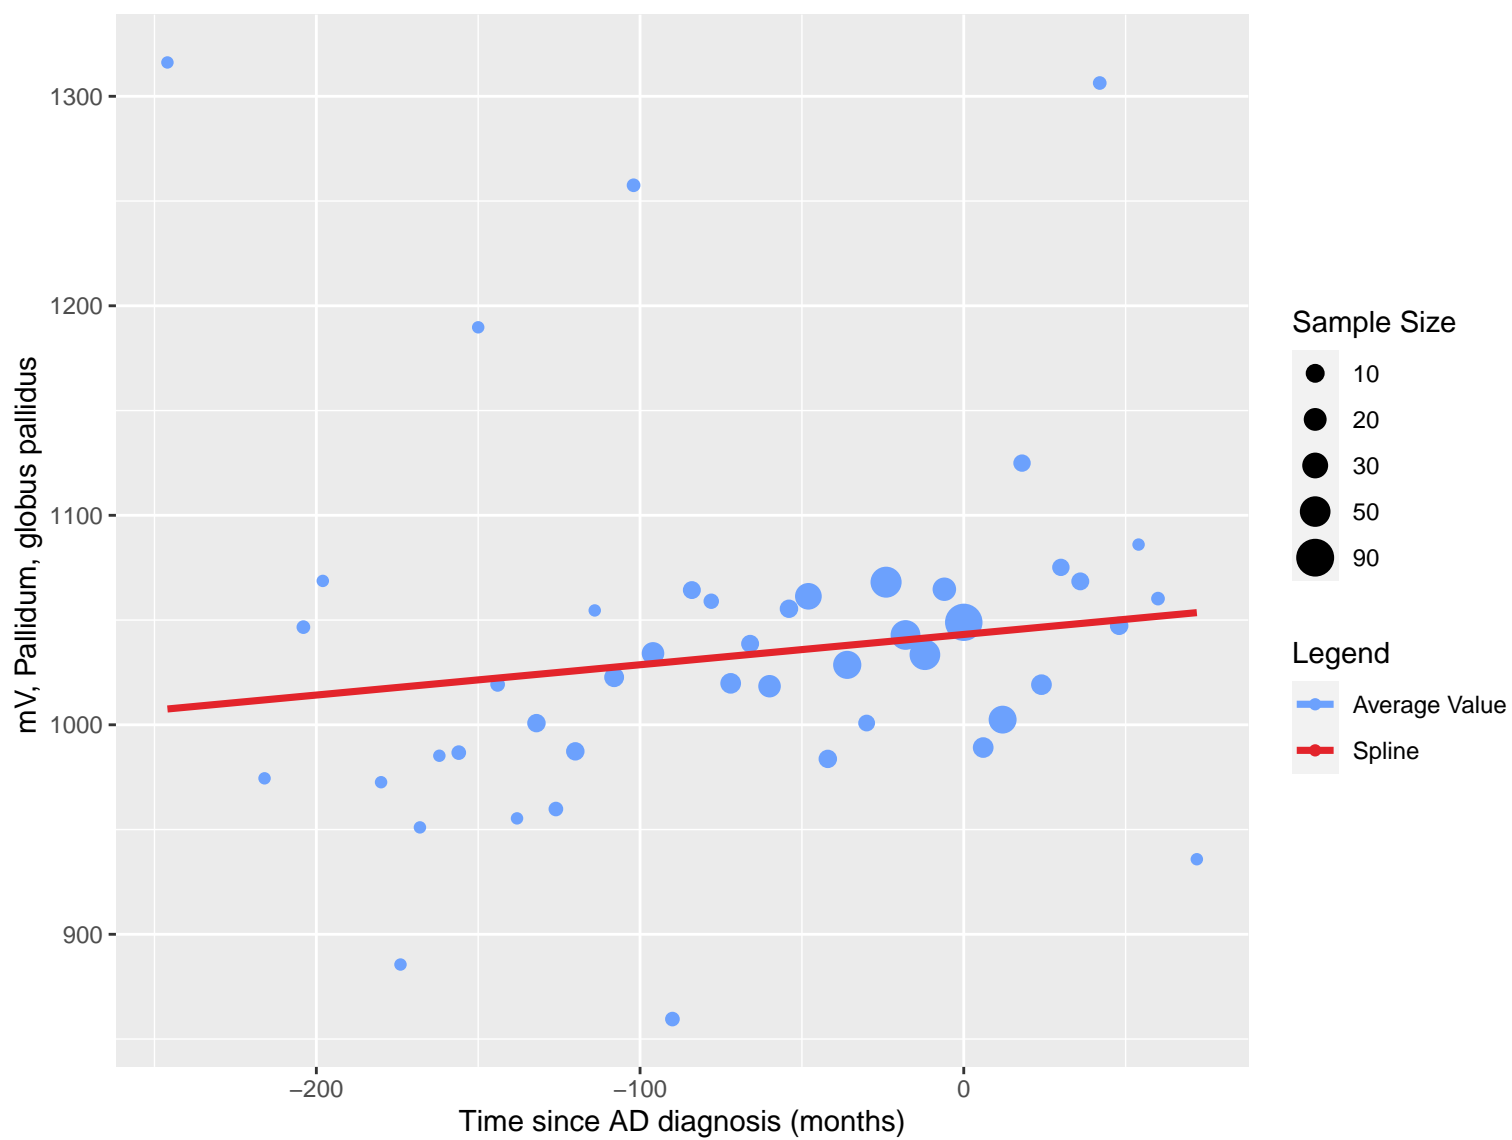

mV, Lateral ventricle, frontal horn, central part and occipital horn

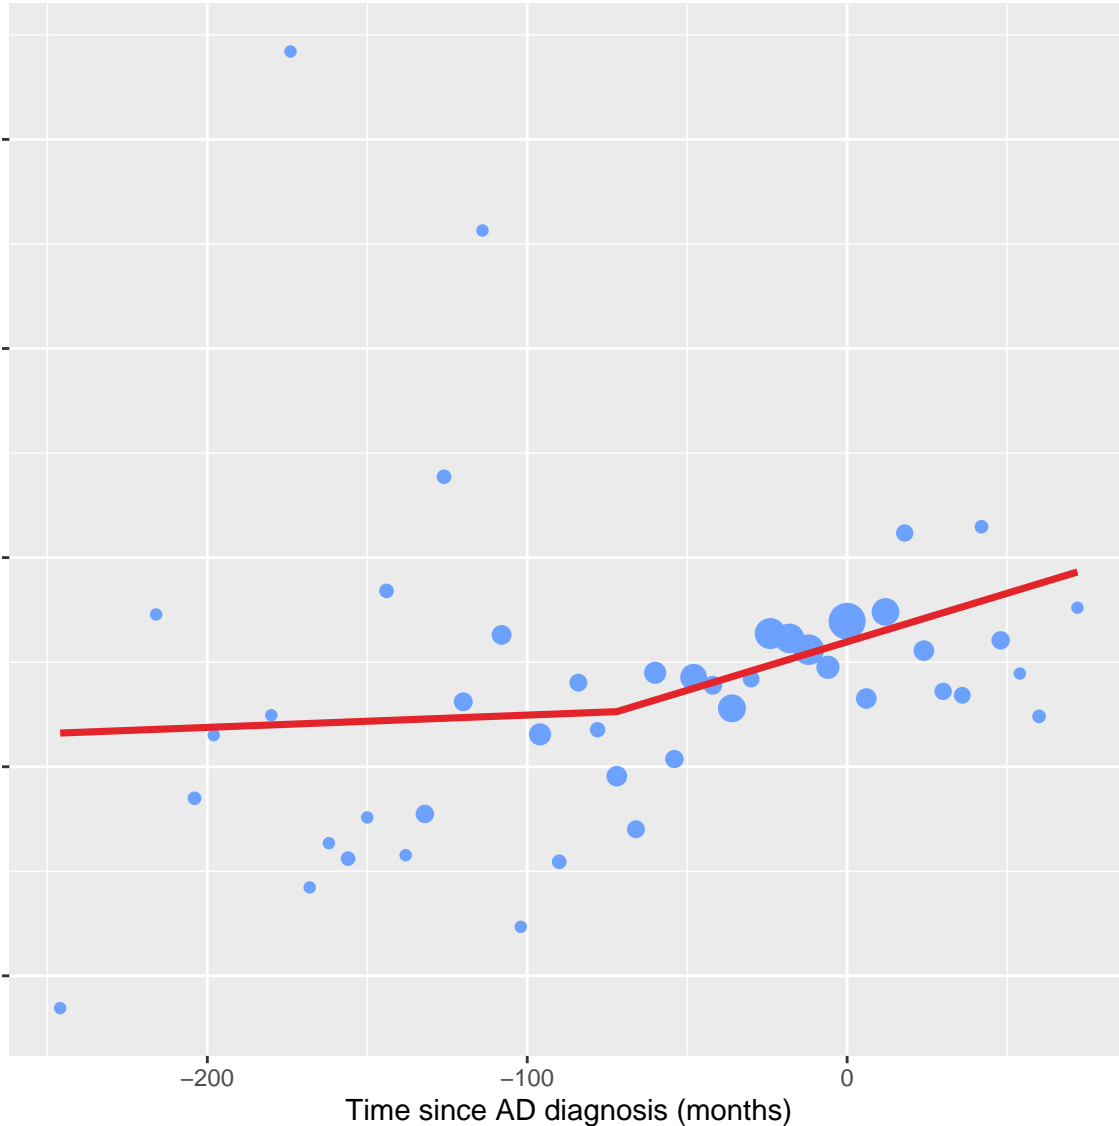

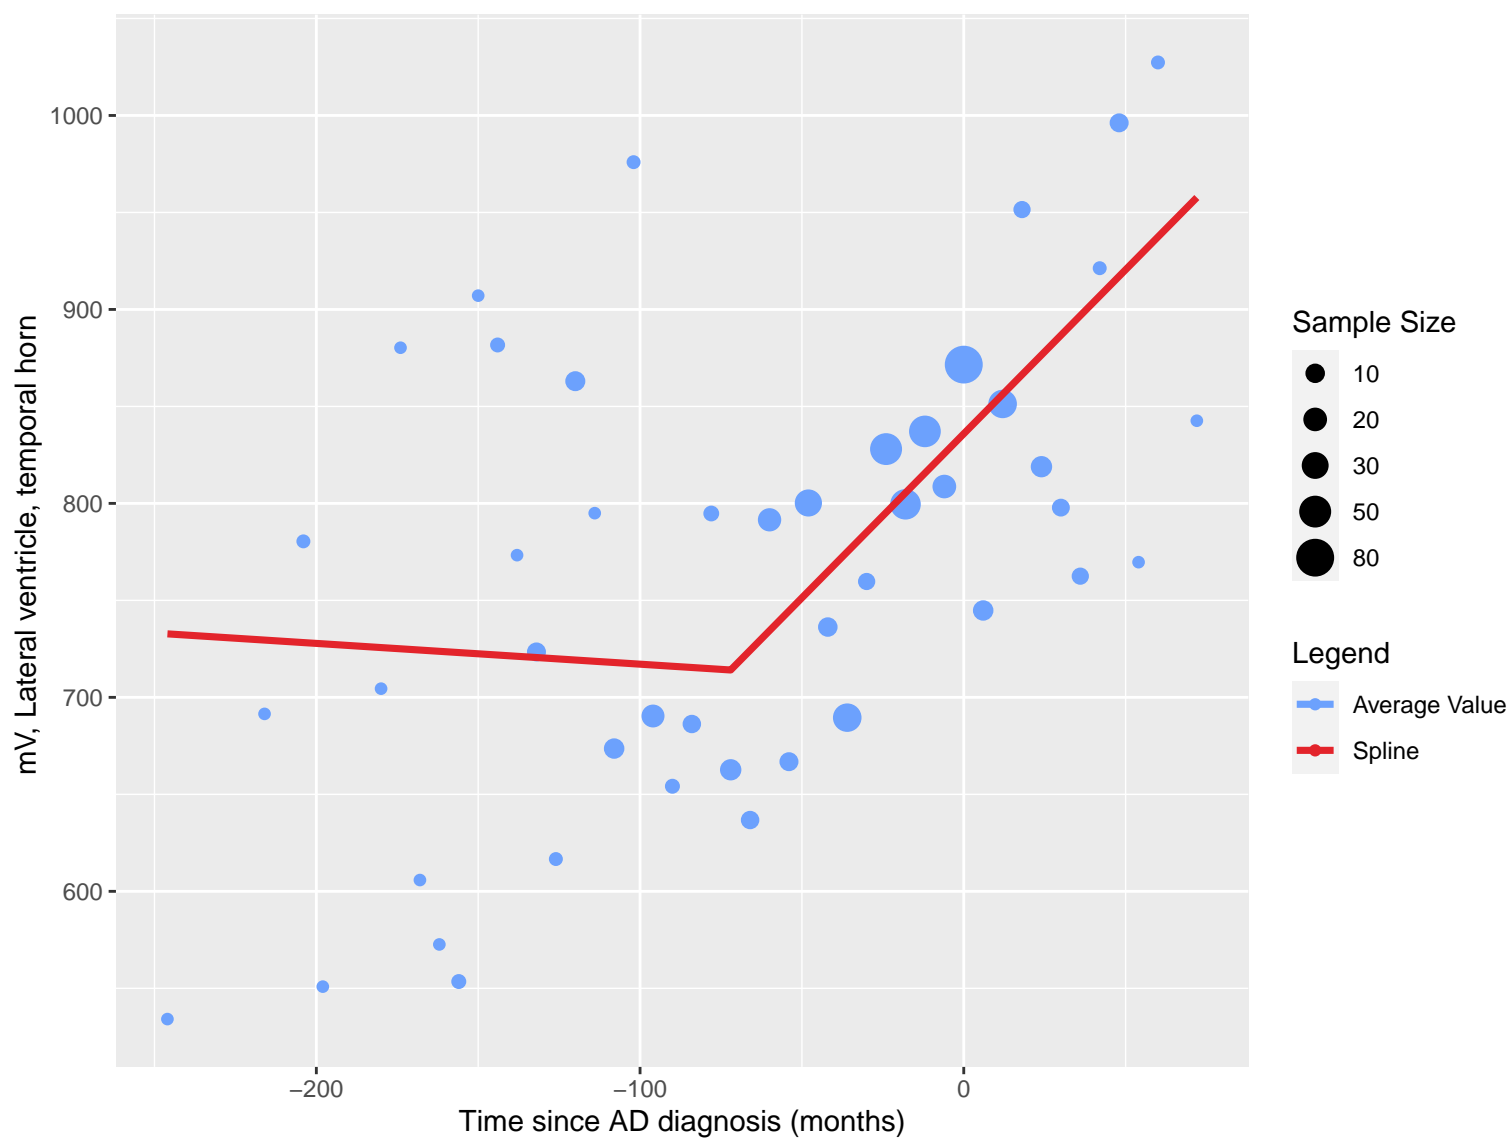

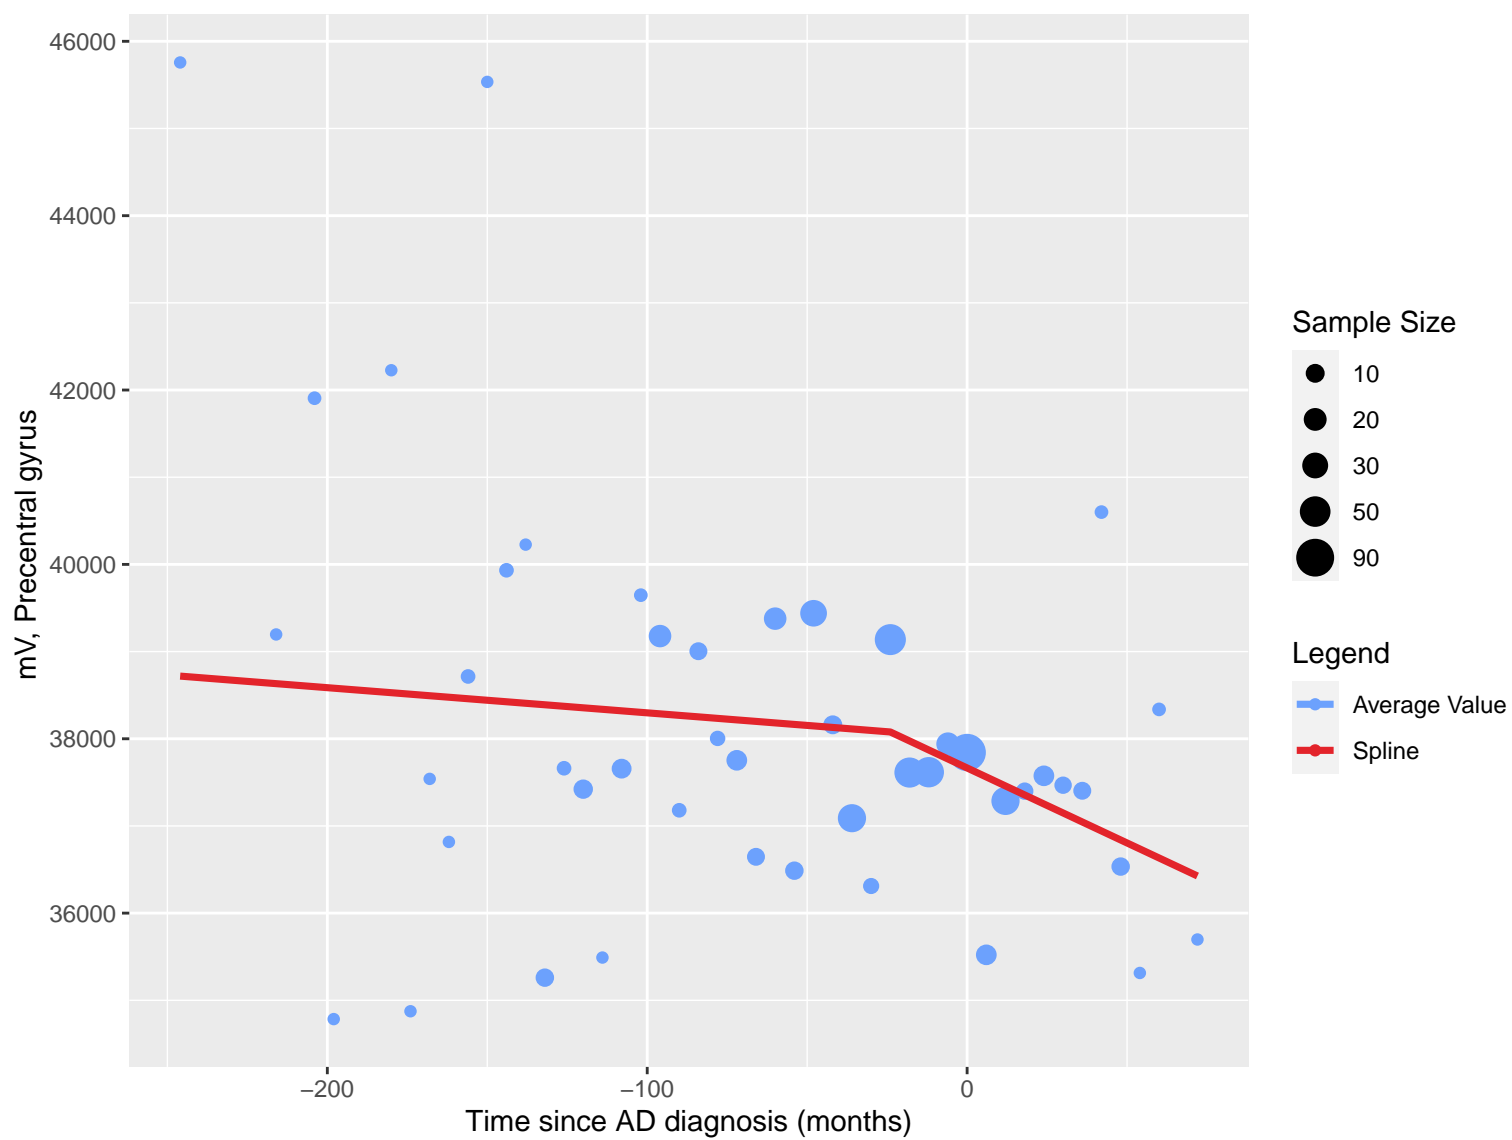

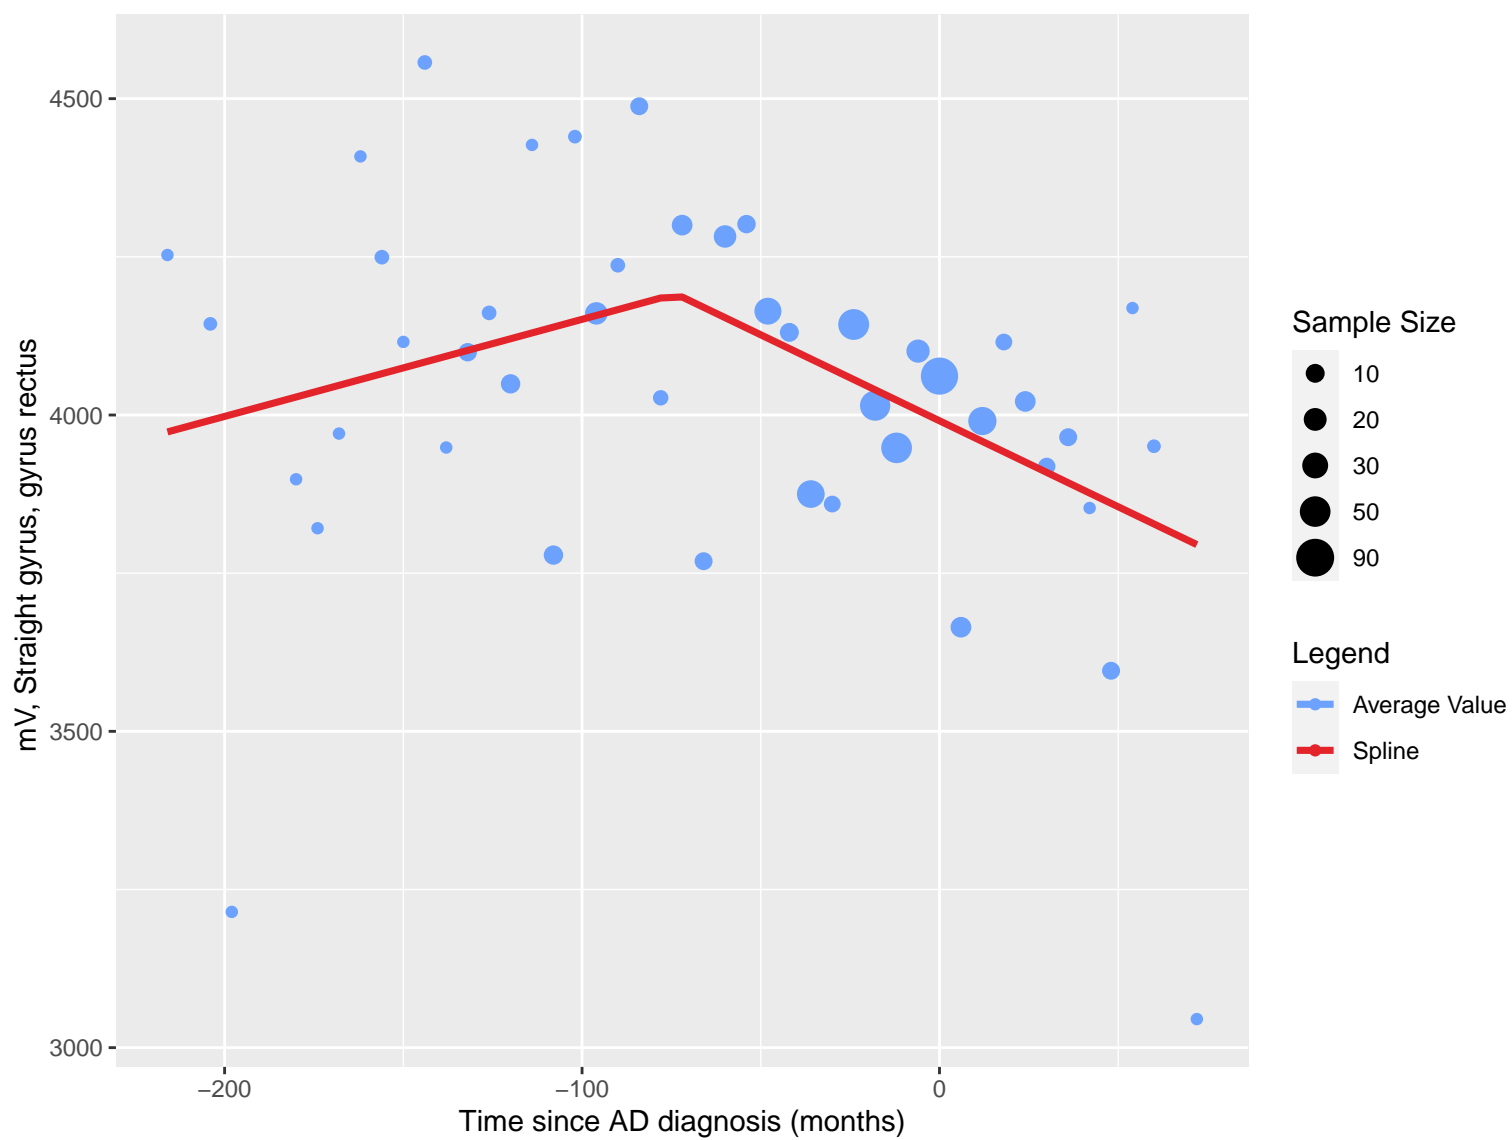

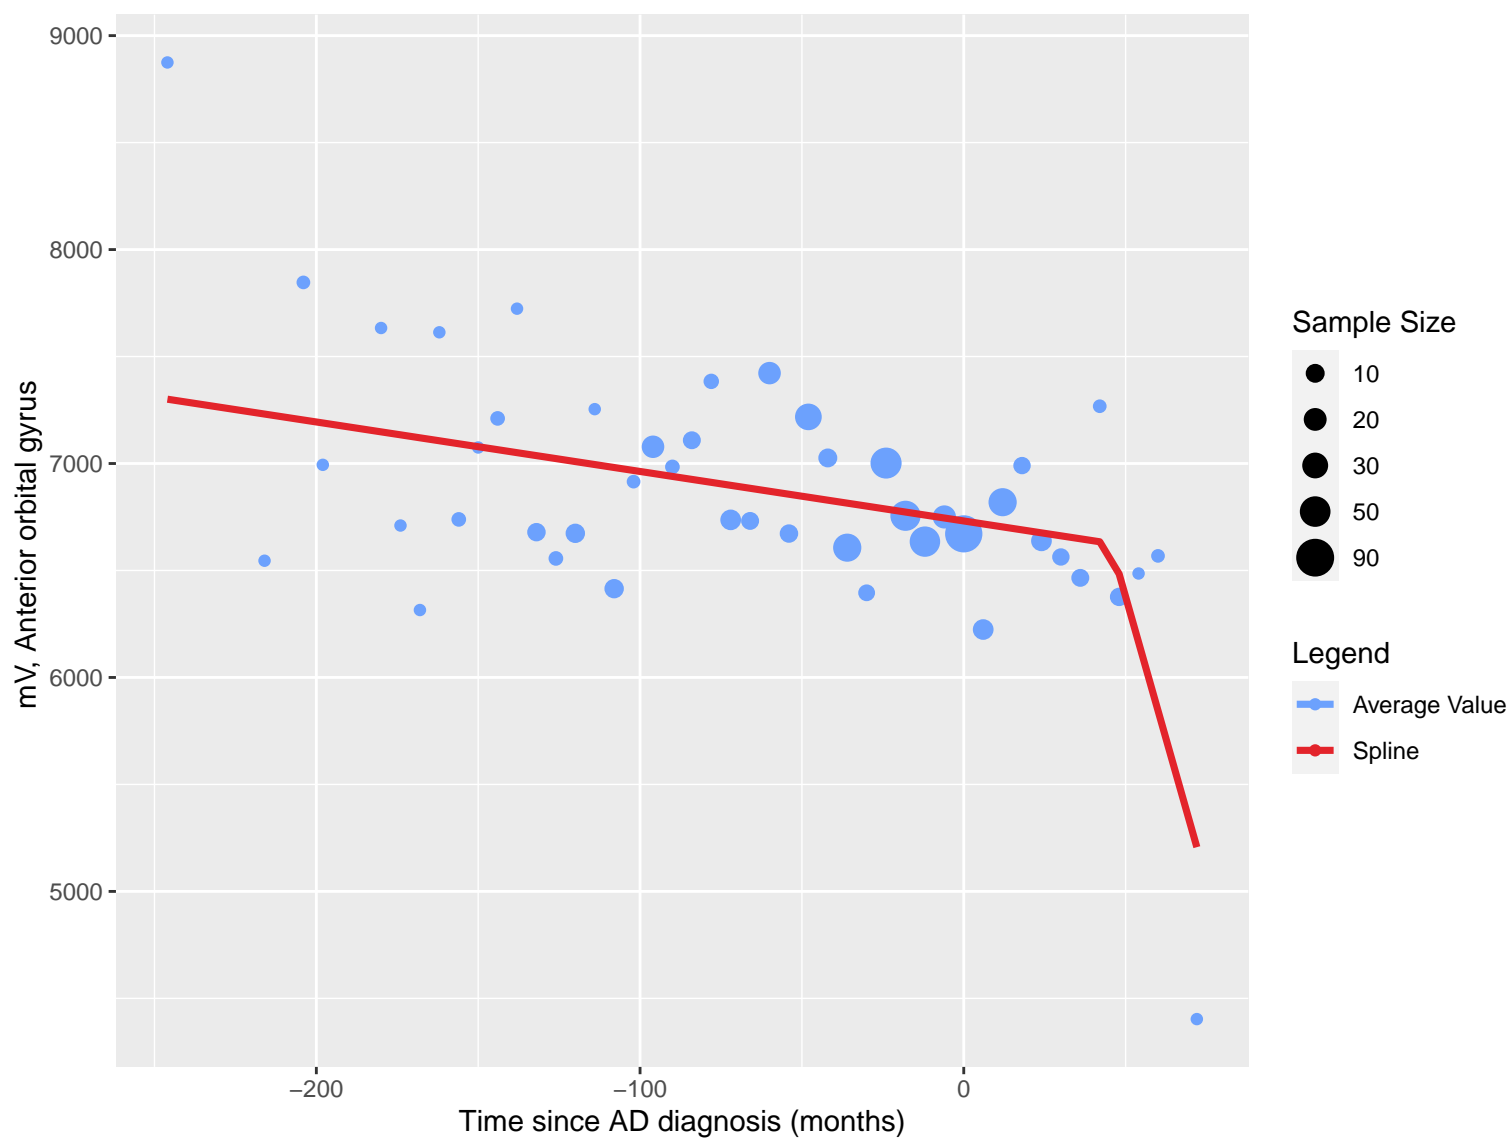



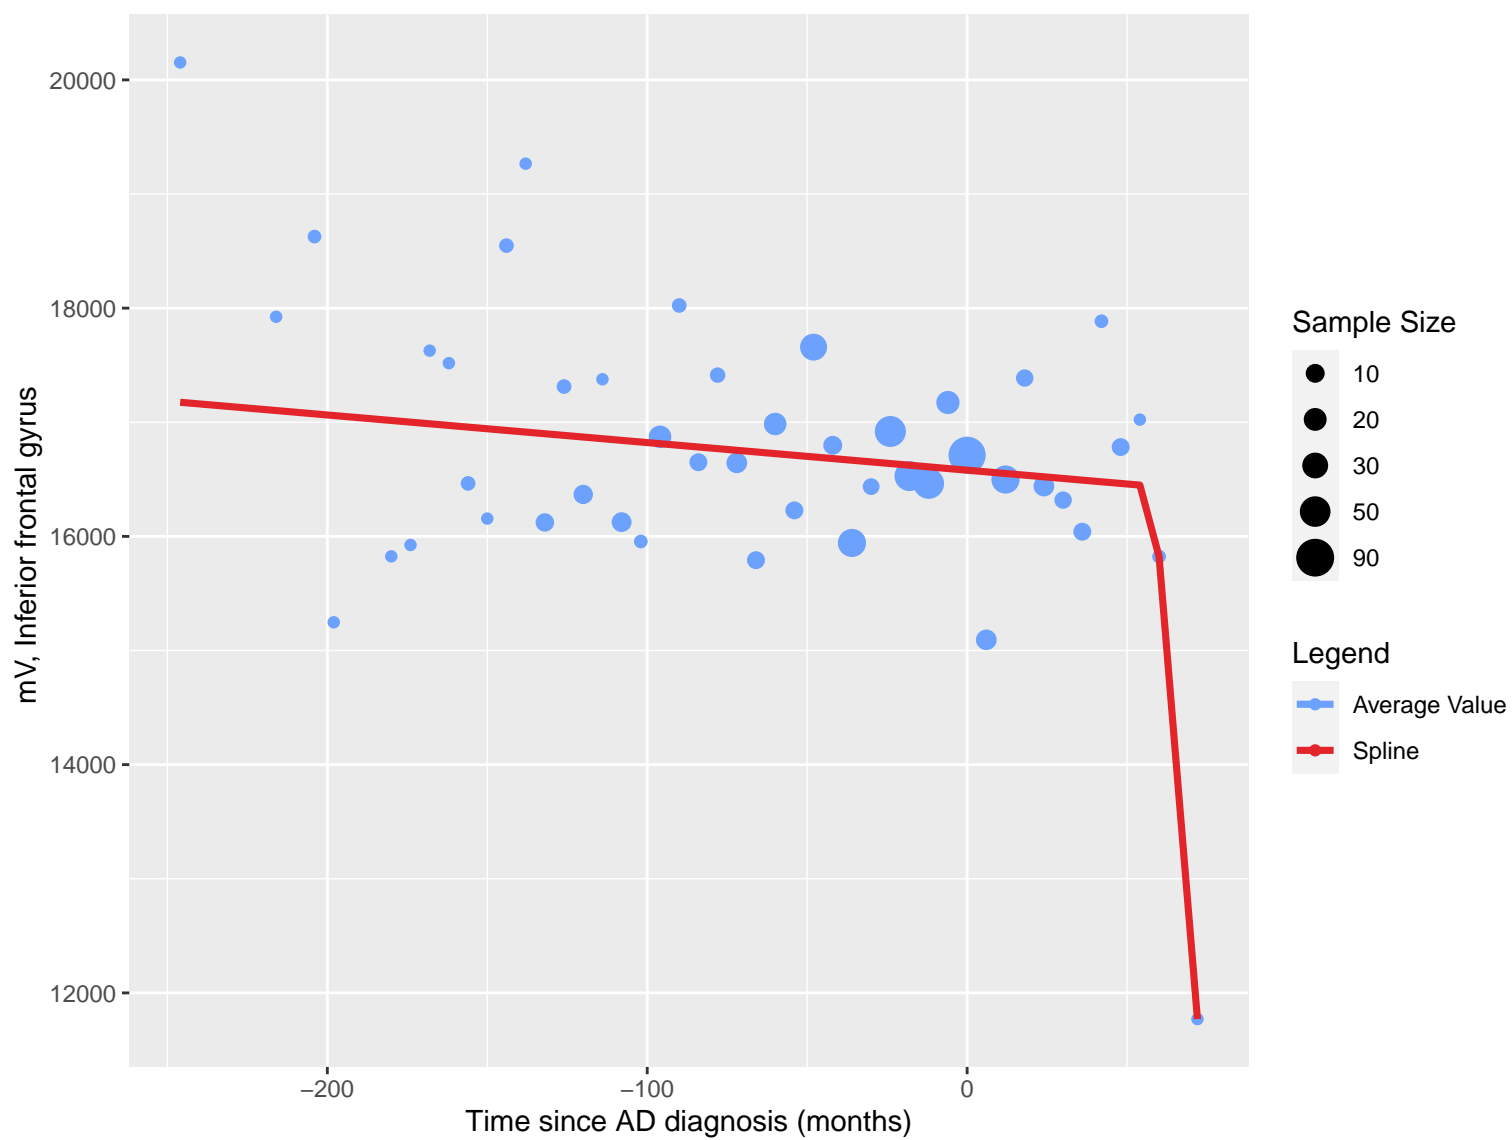

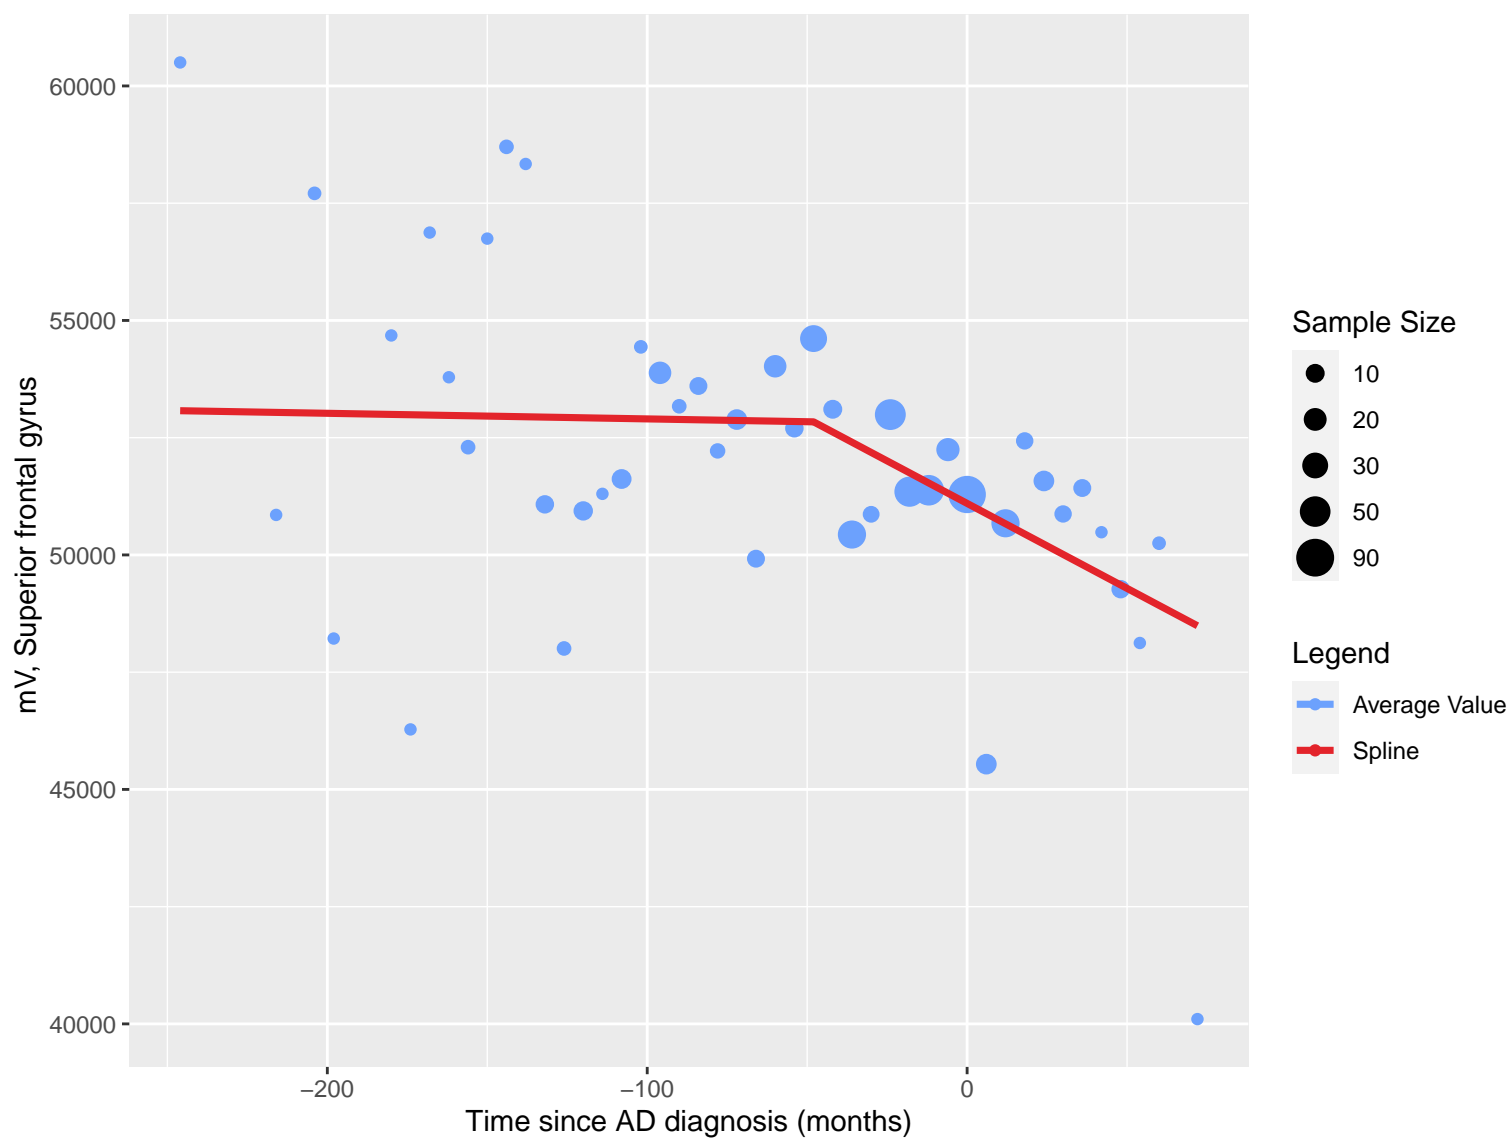

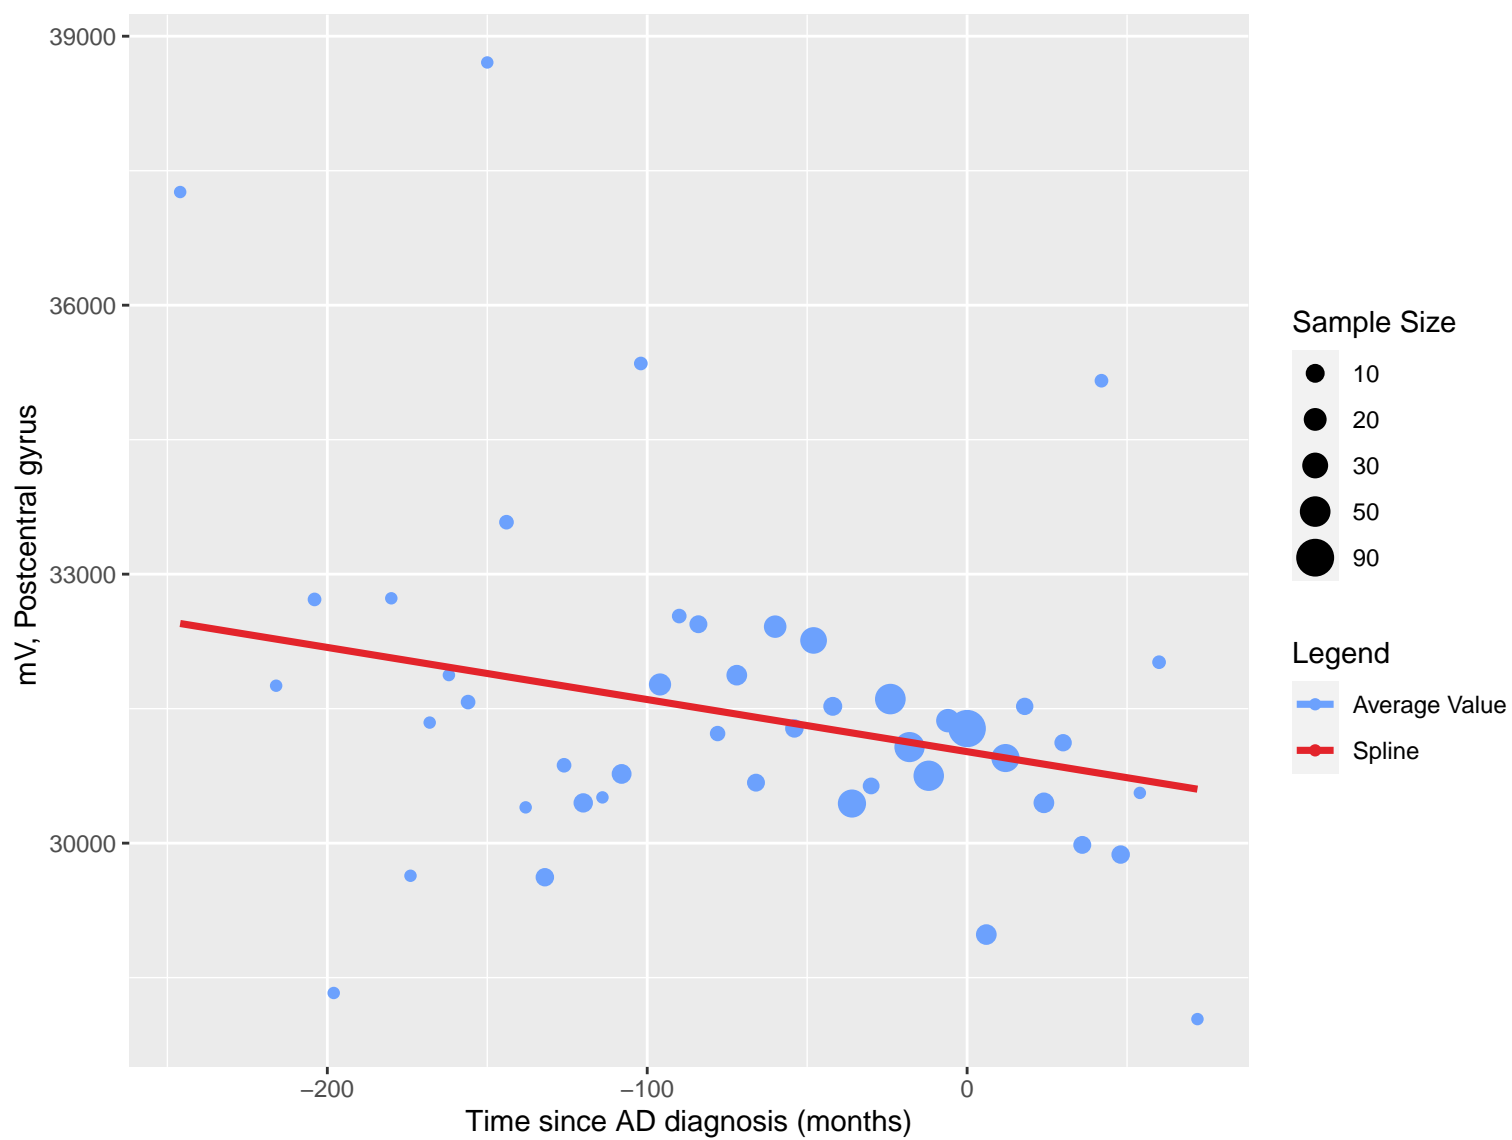

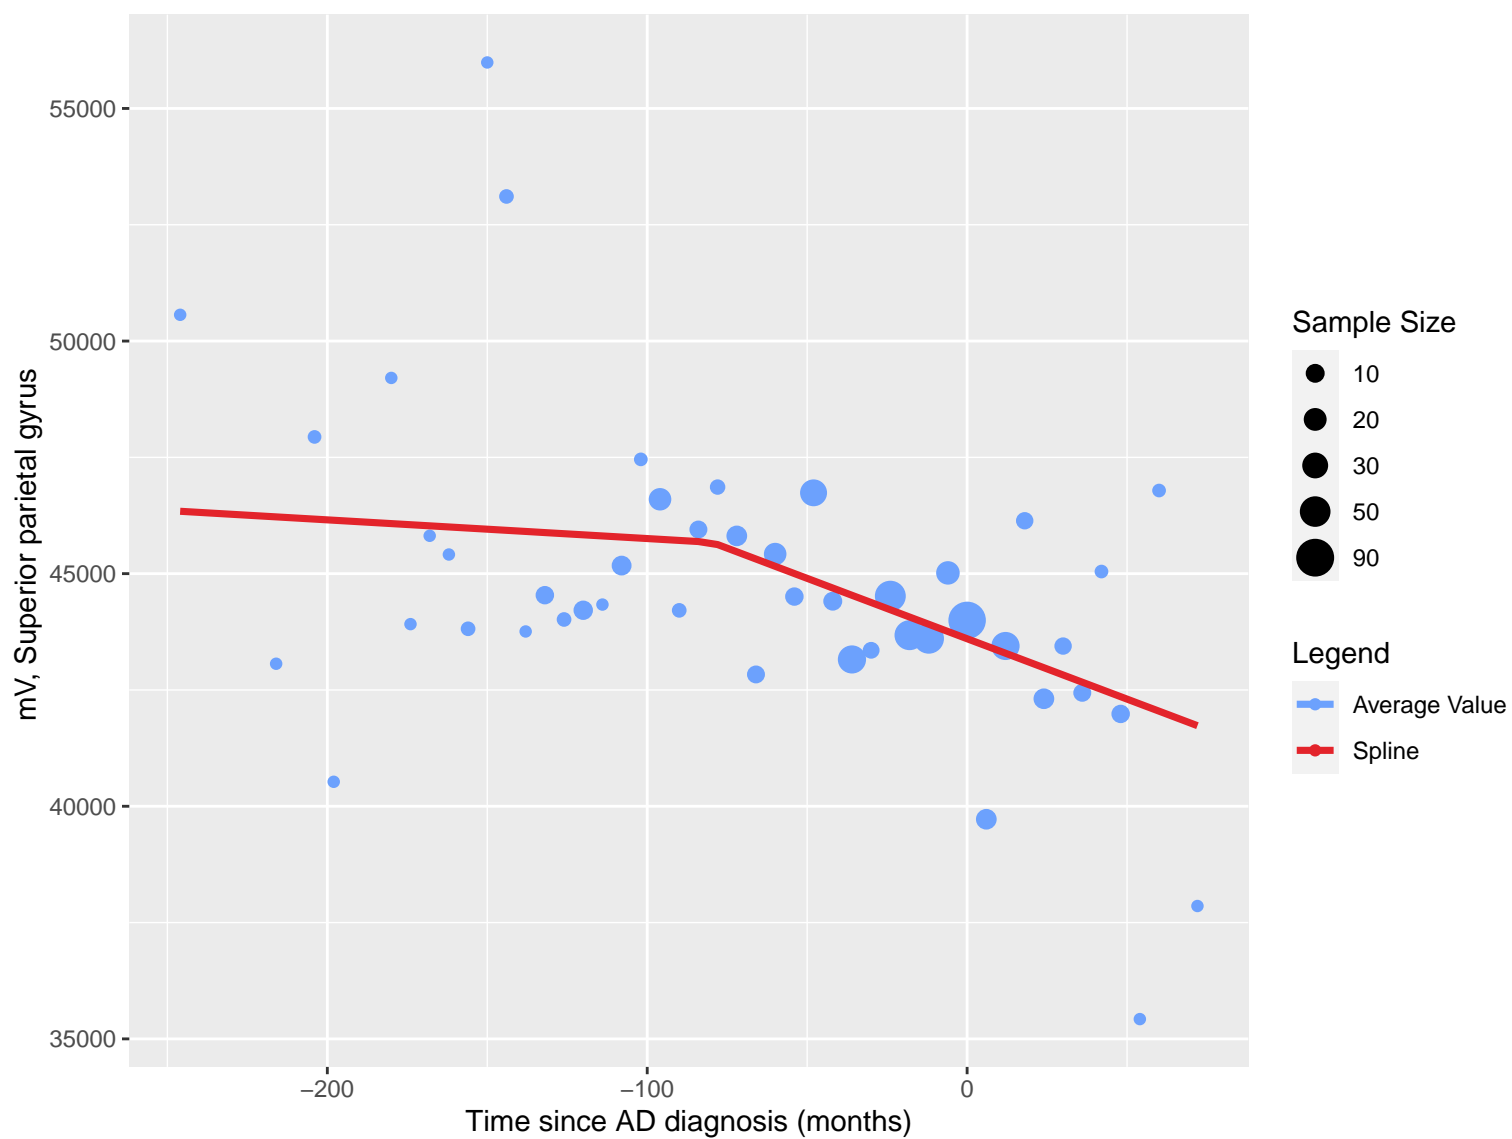

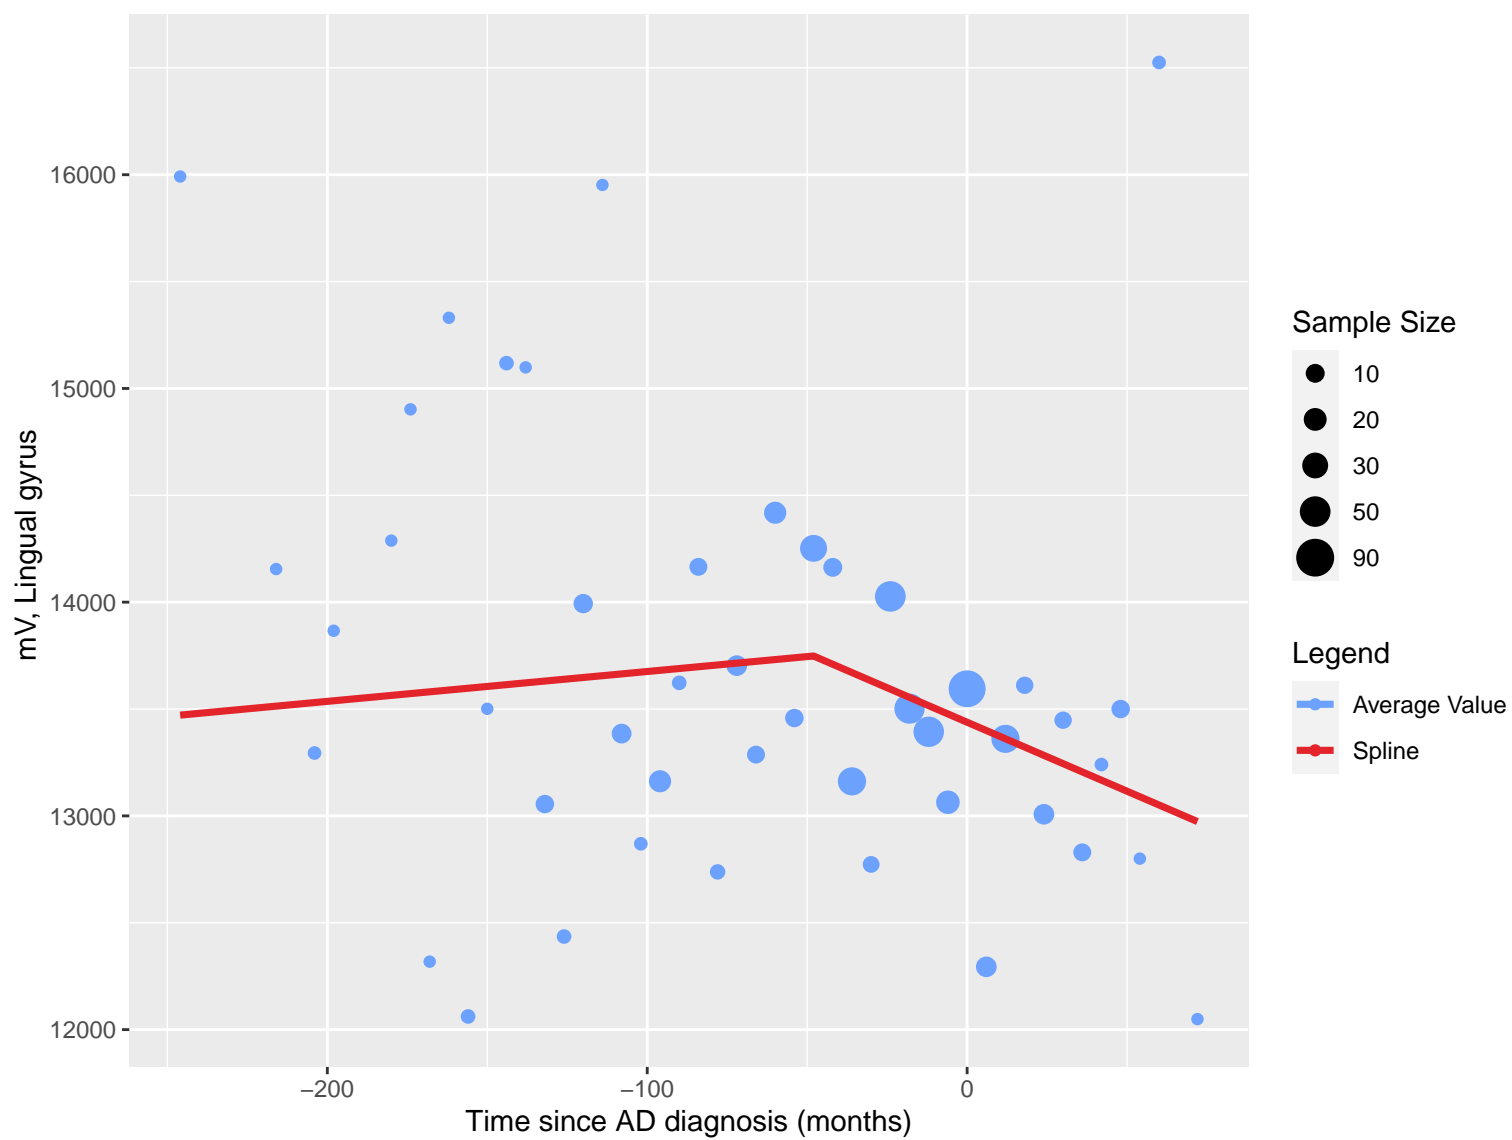

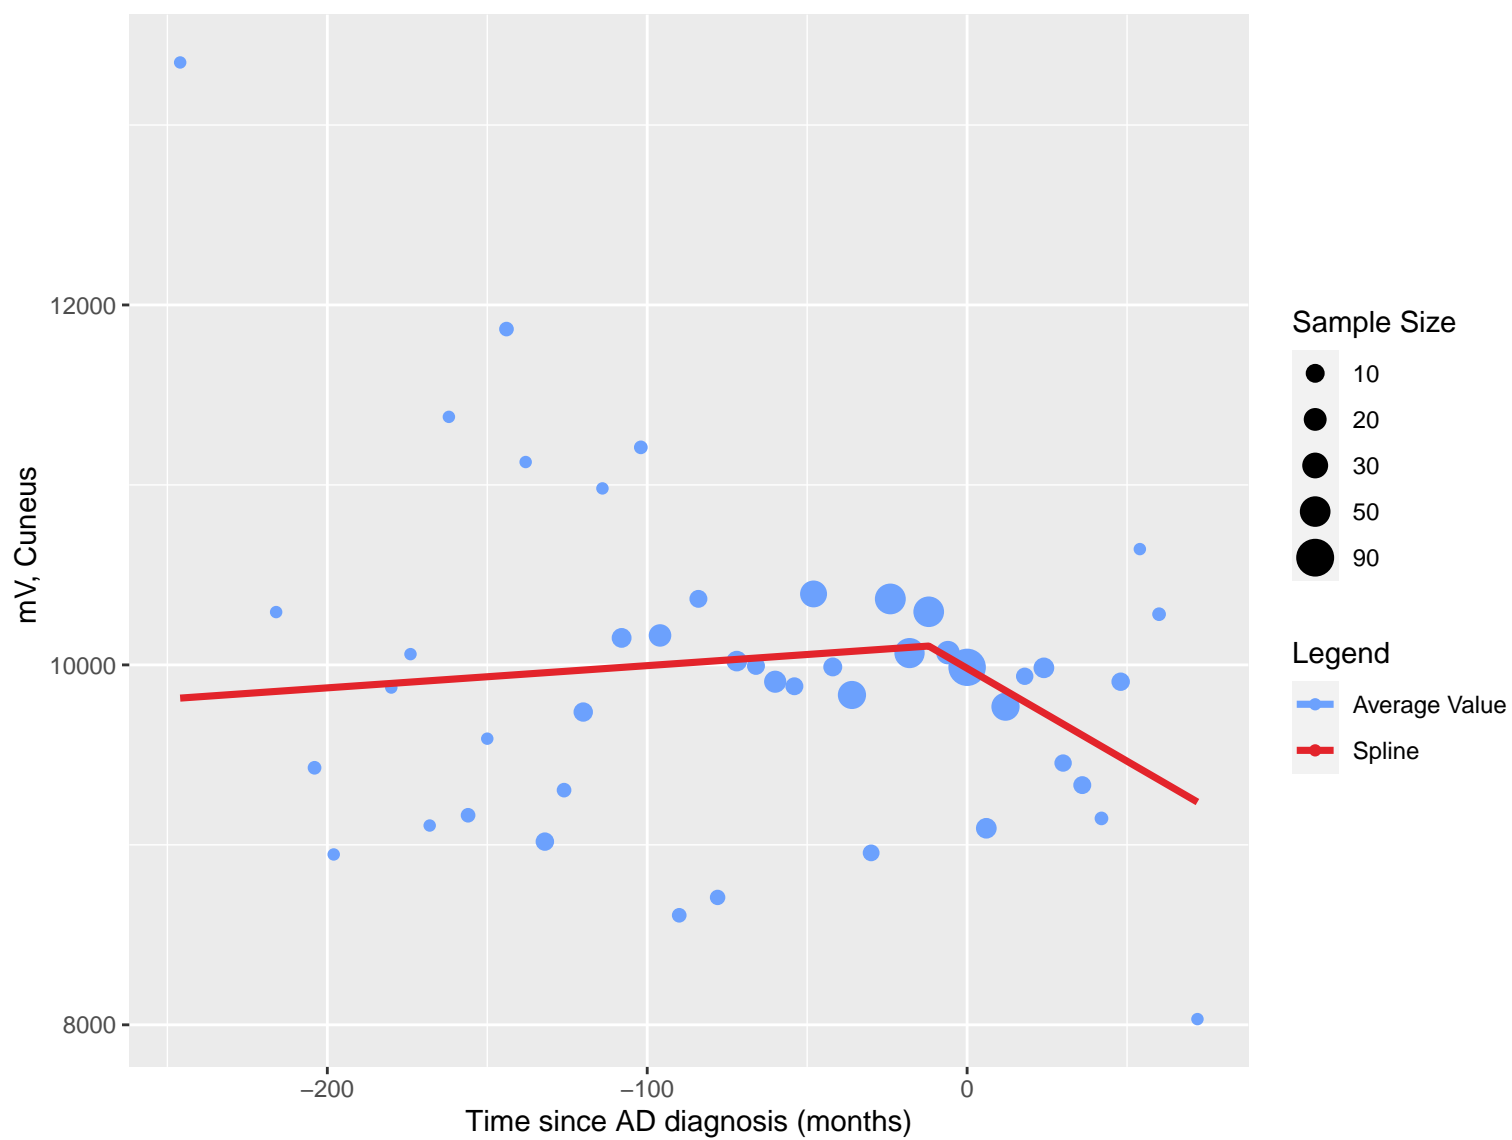

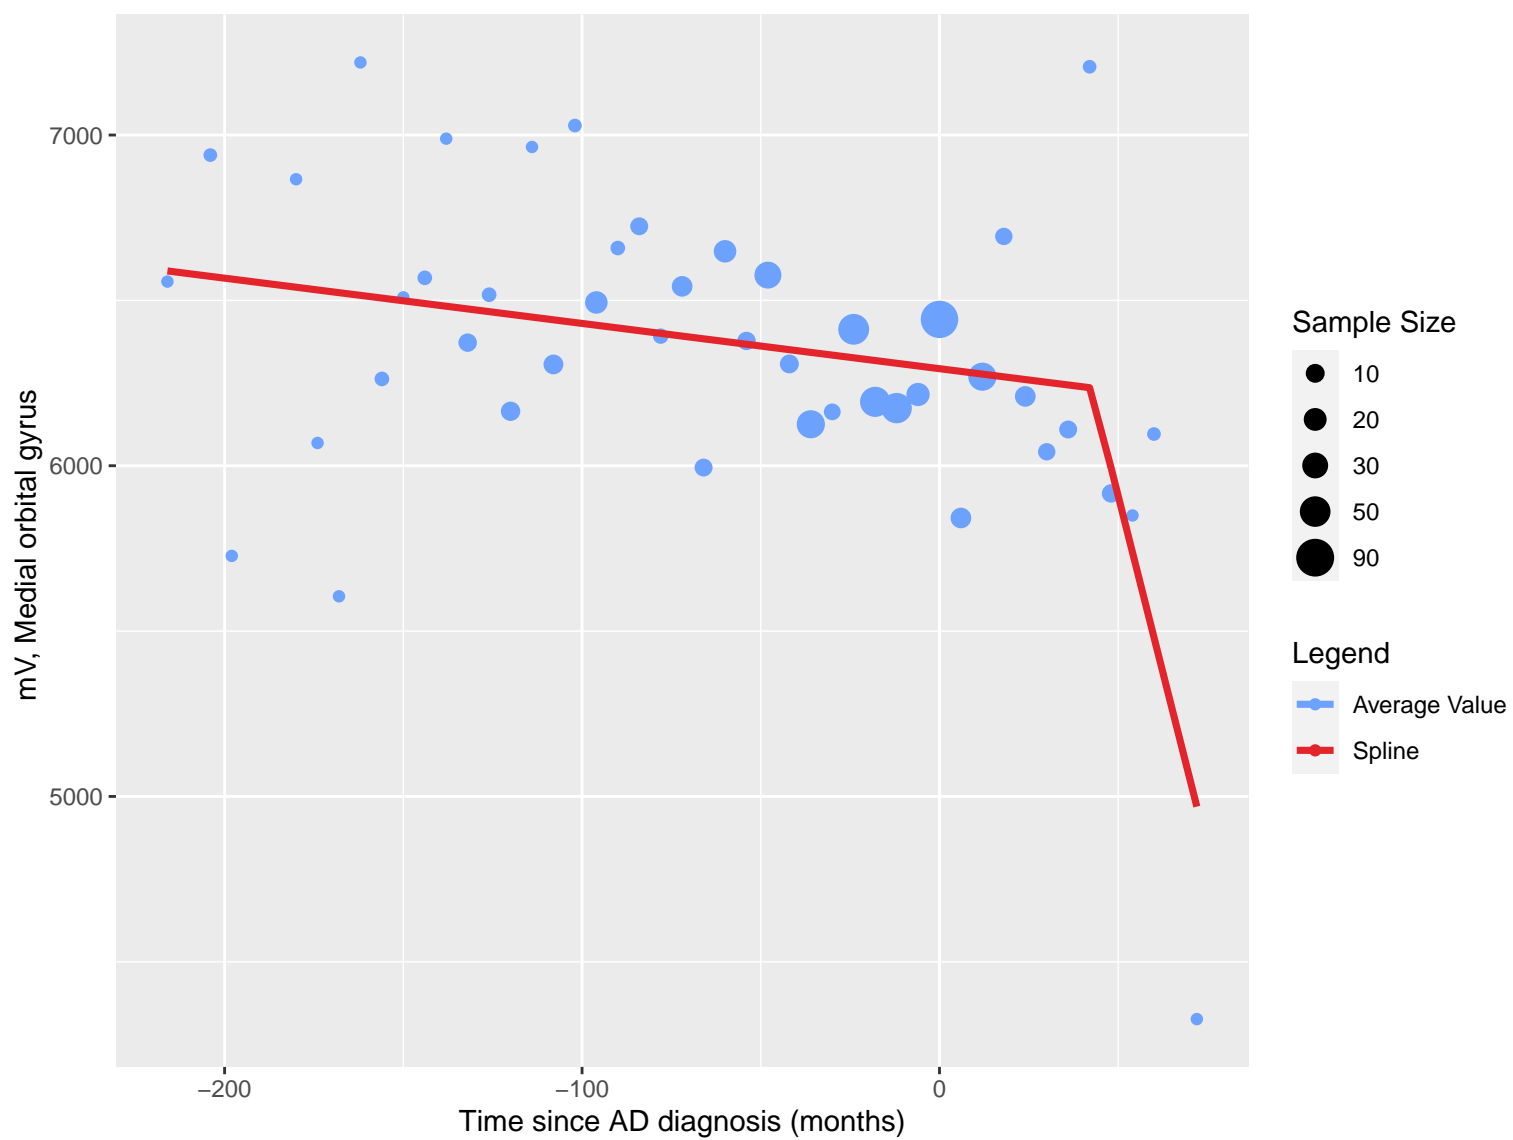

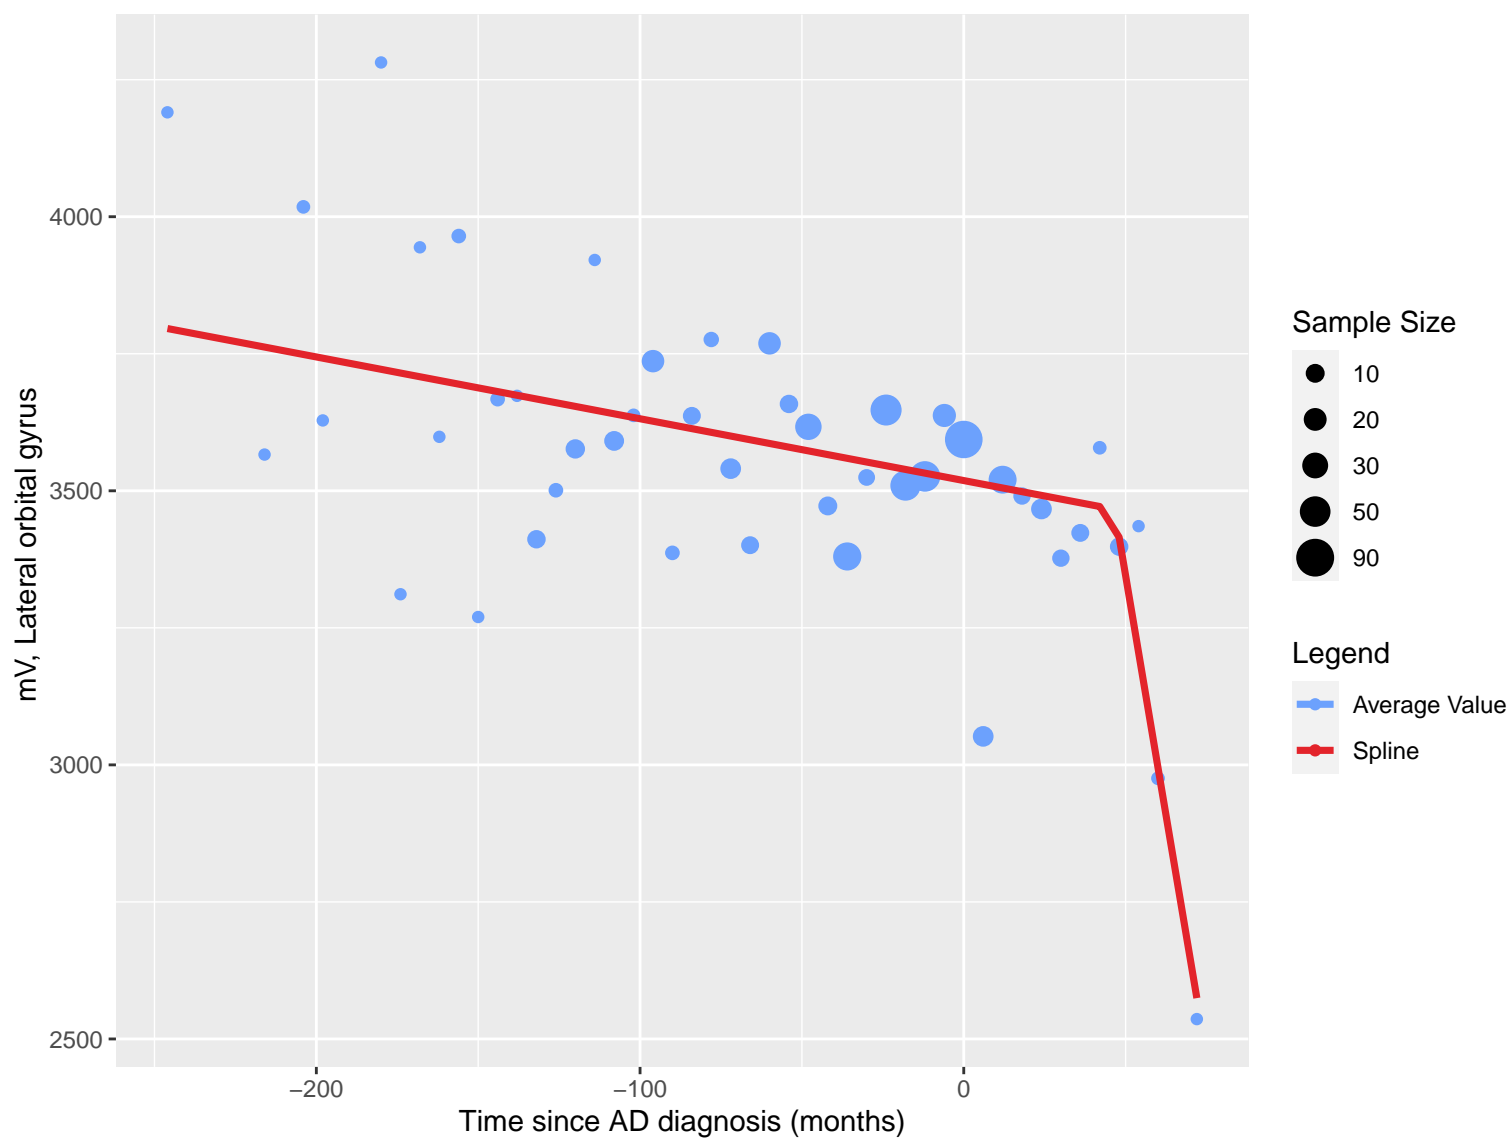



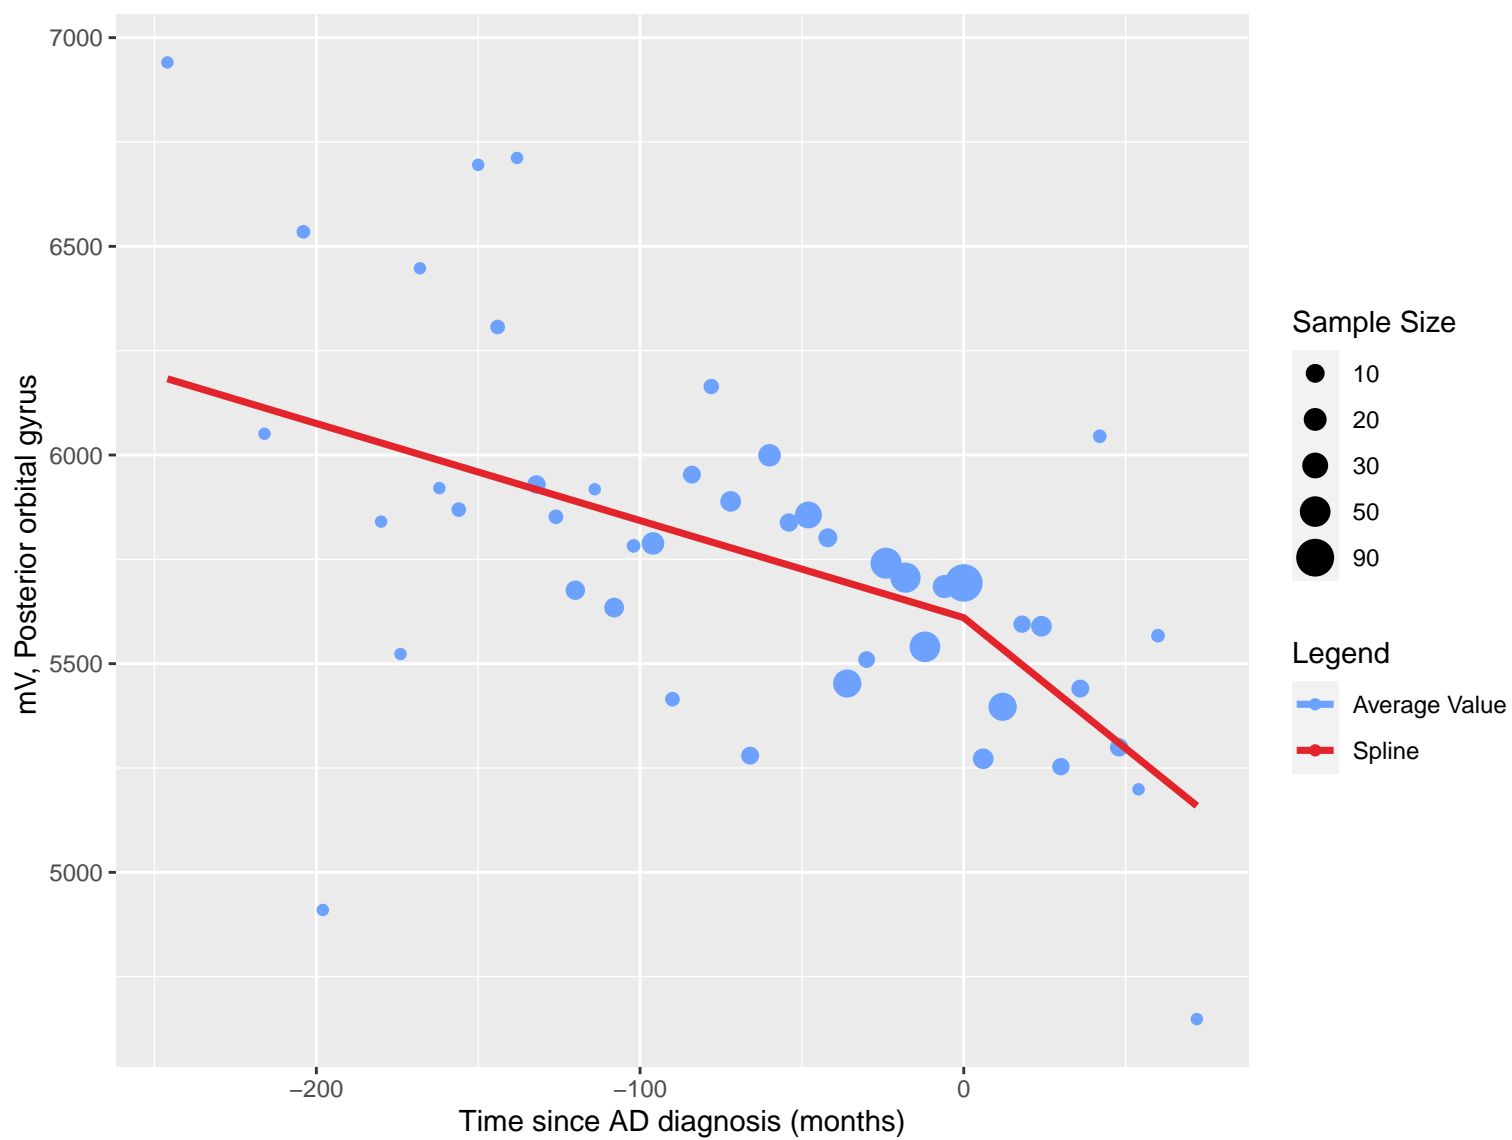

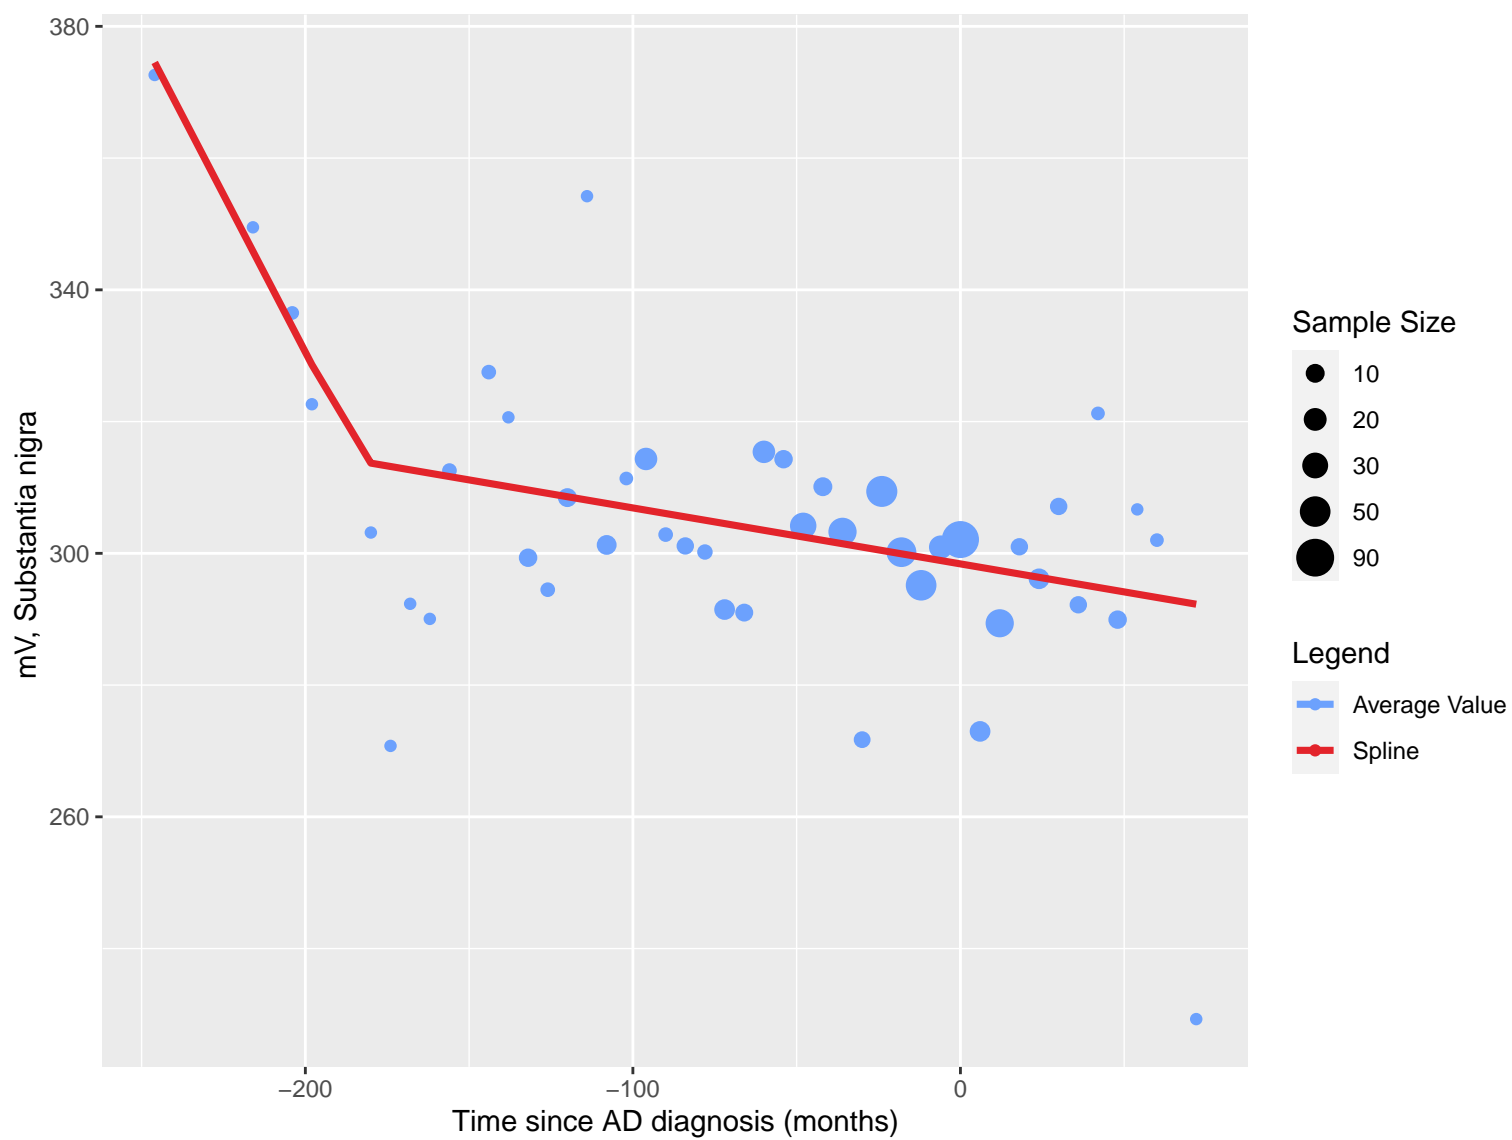

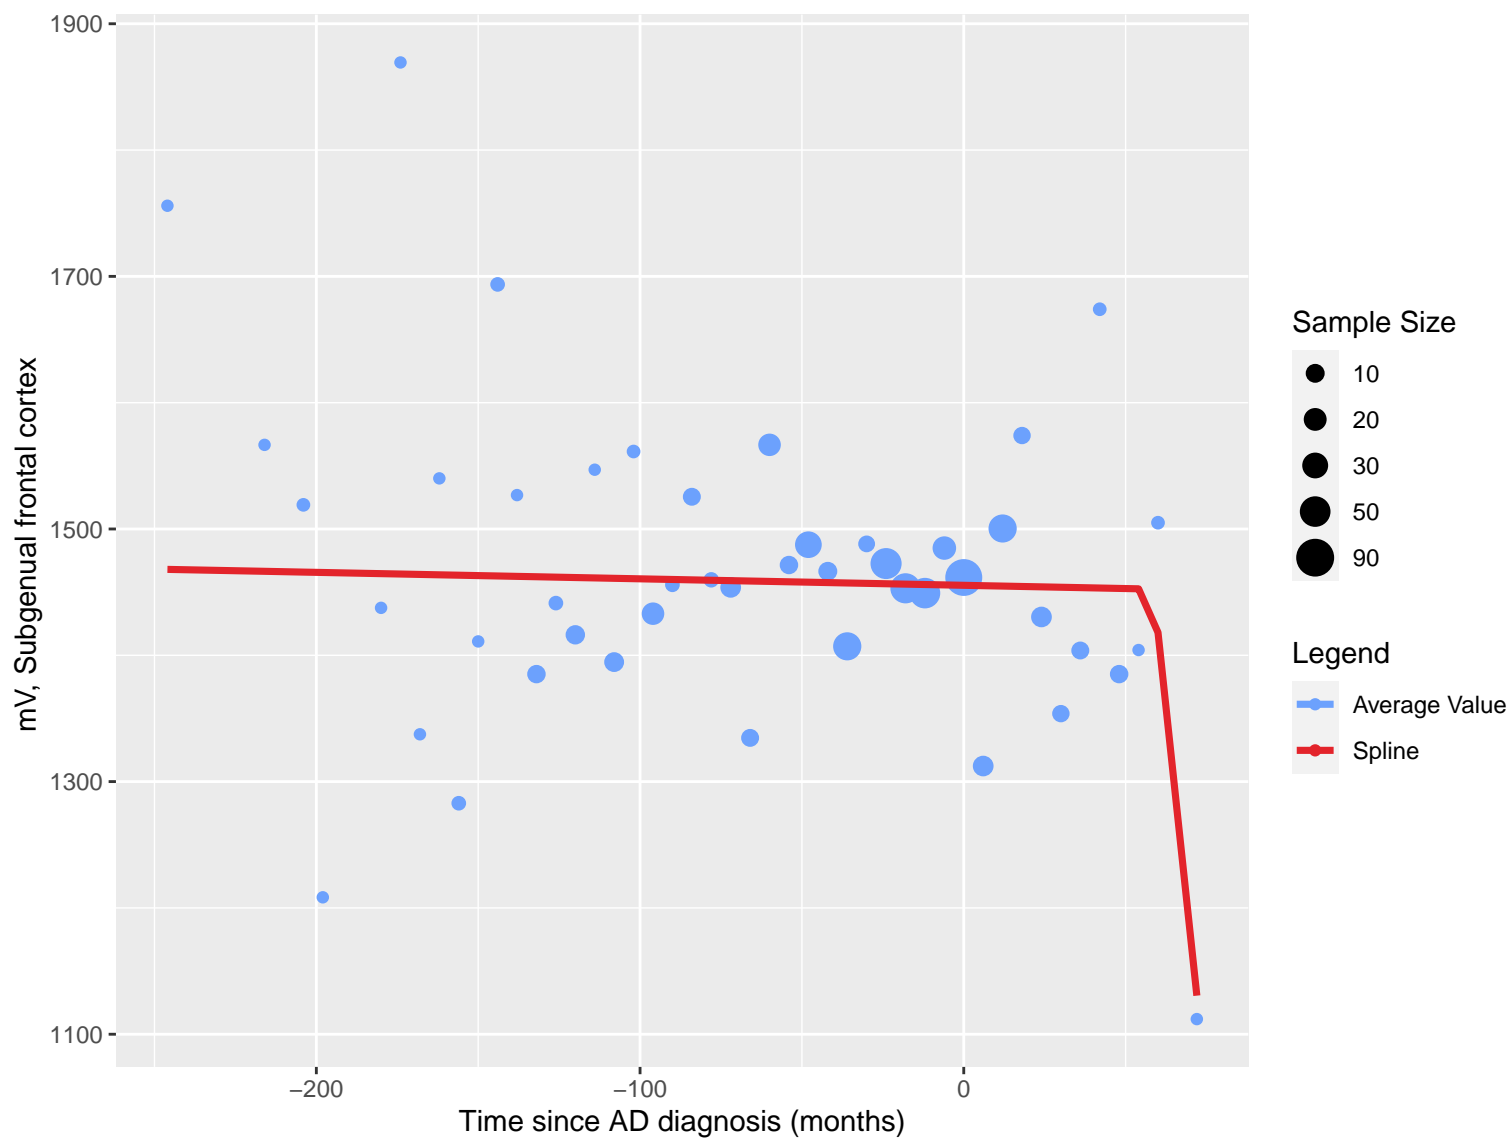

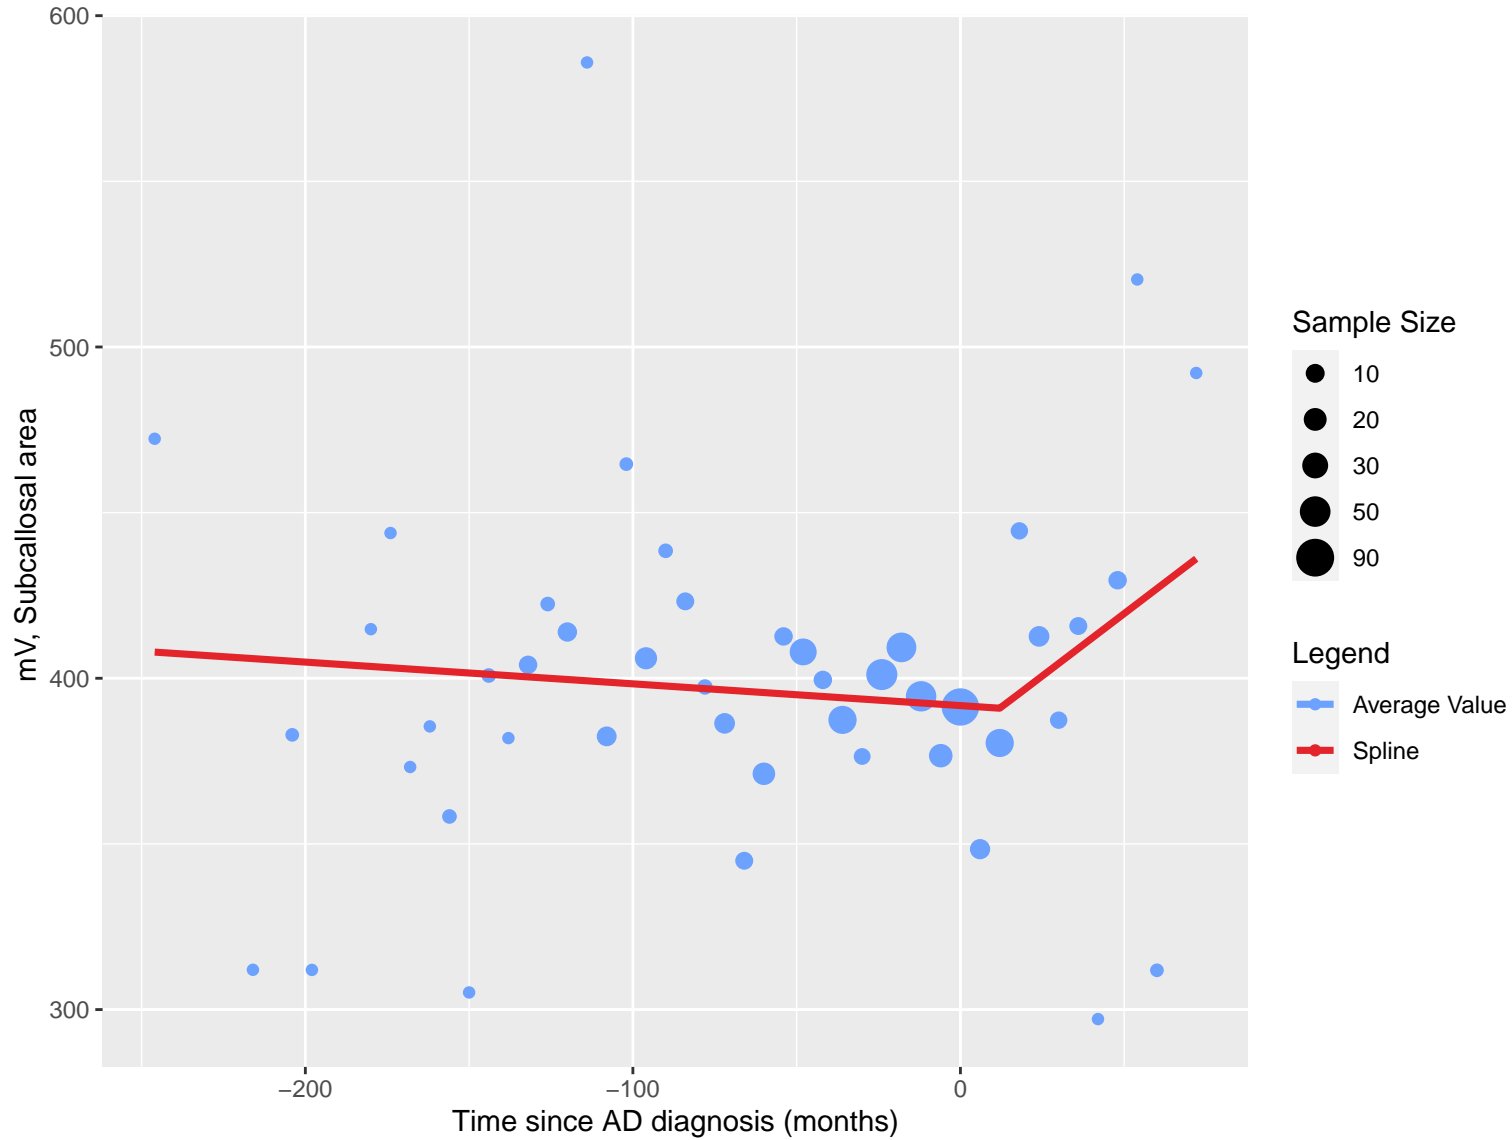

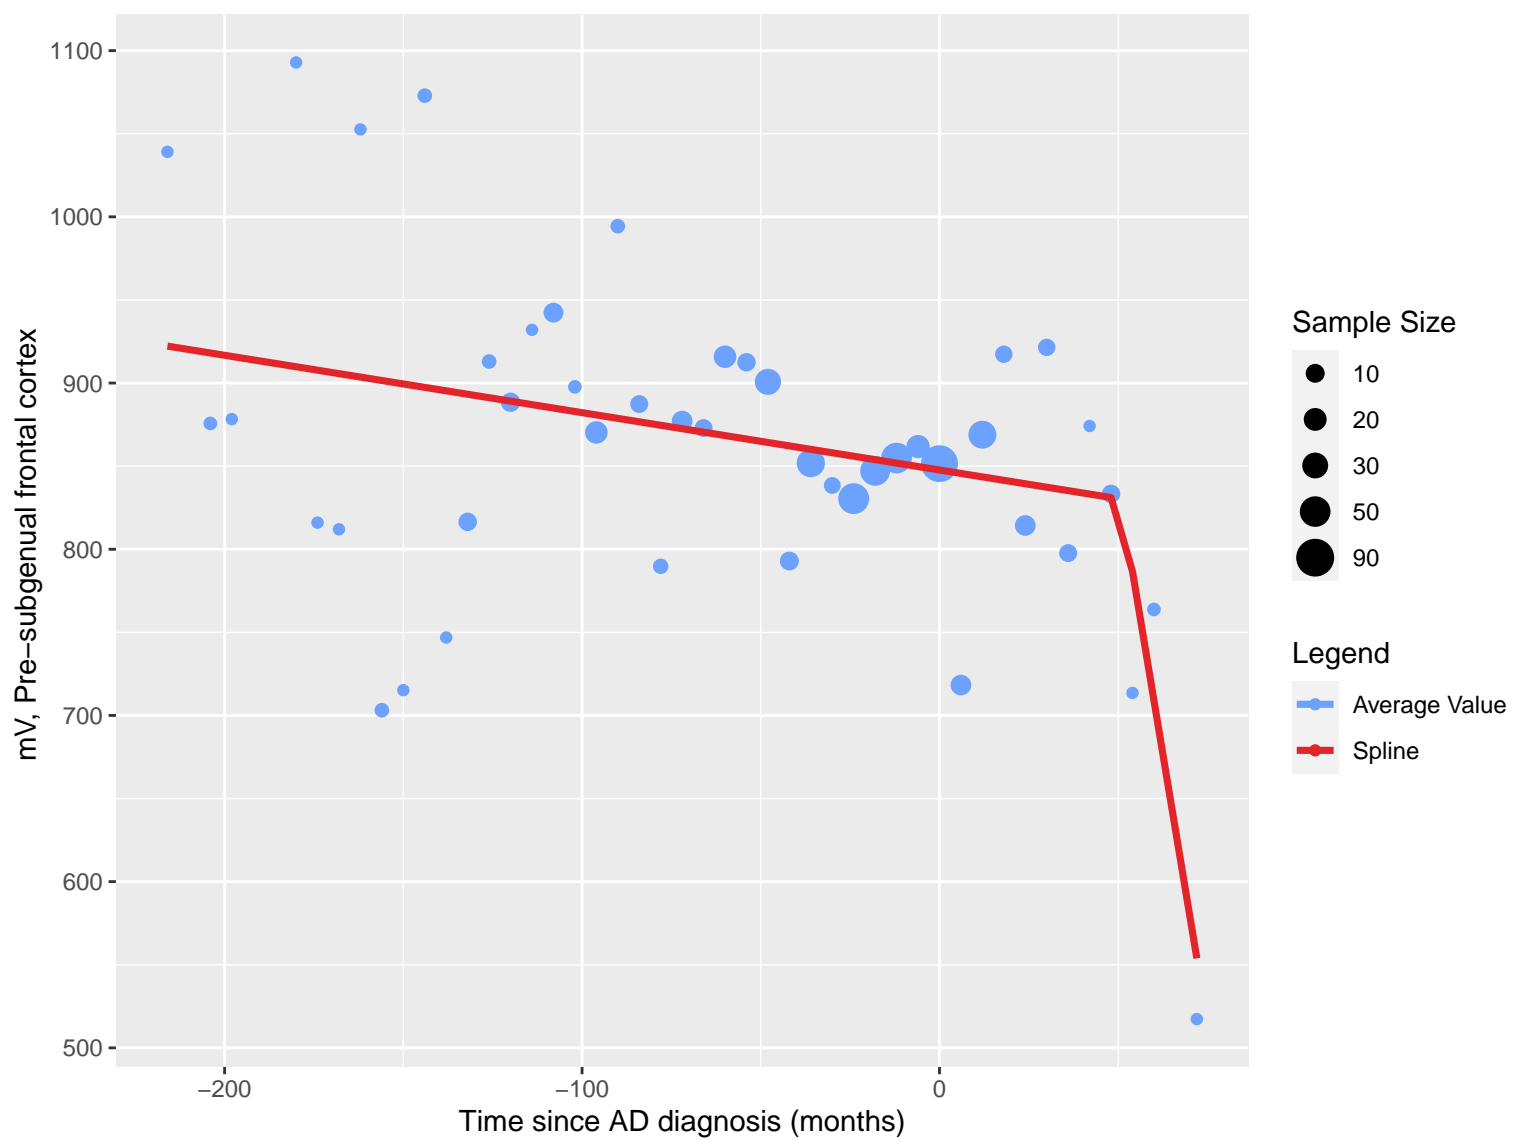

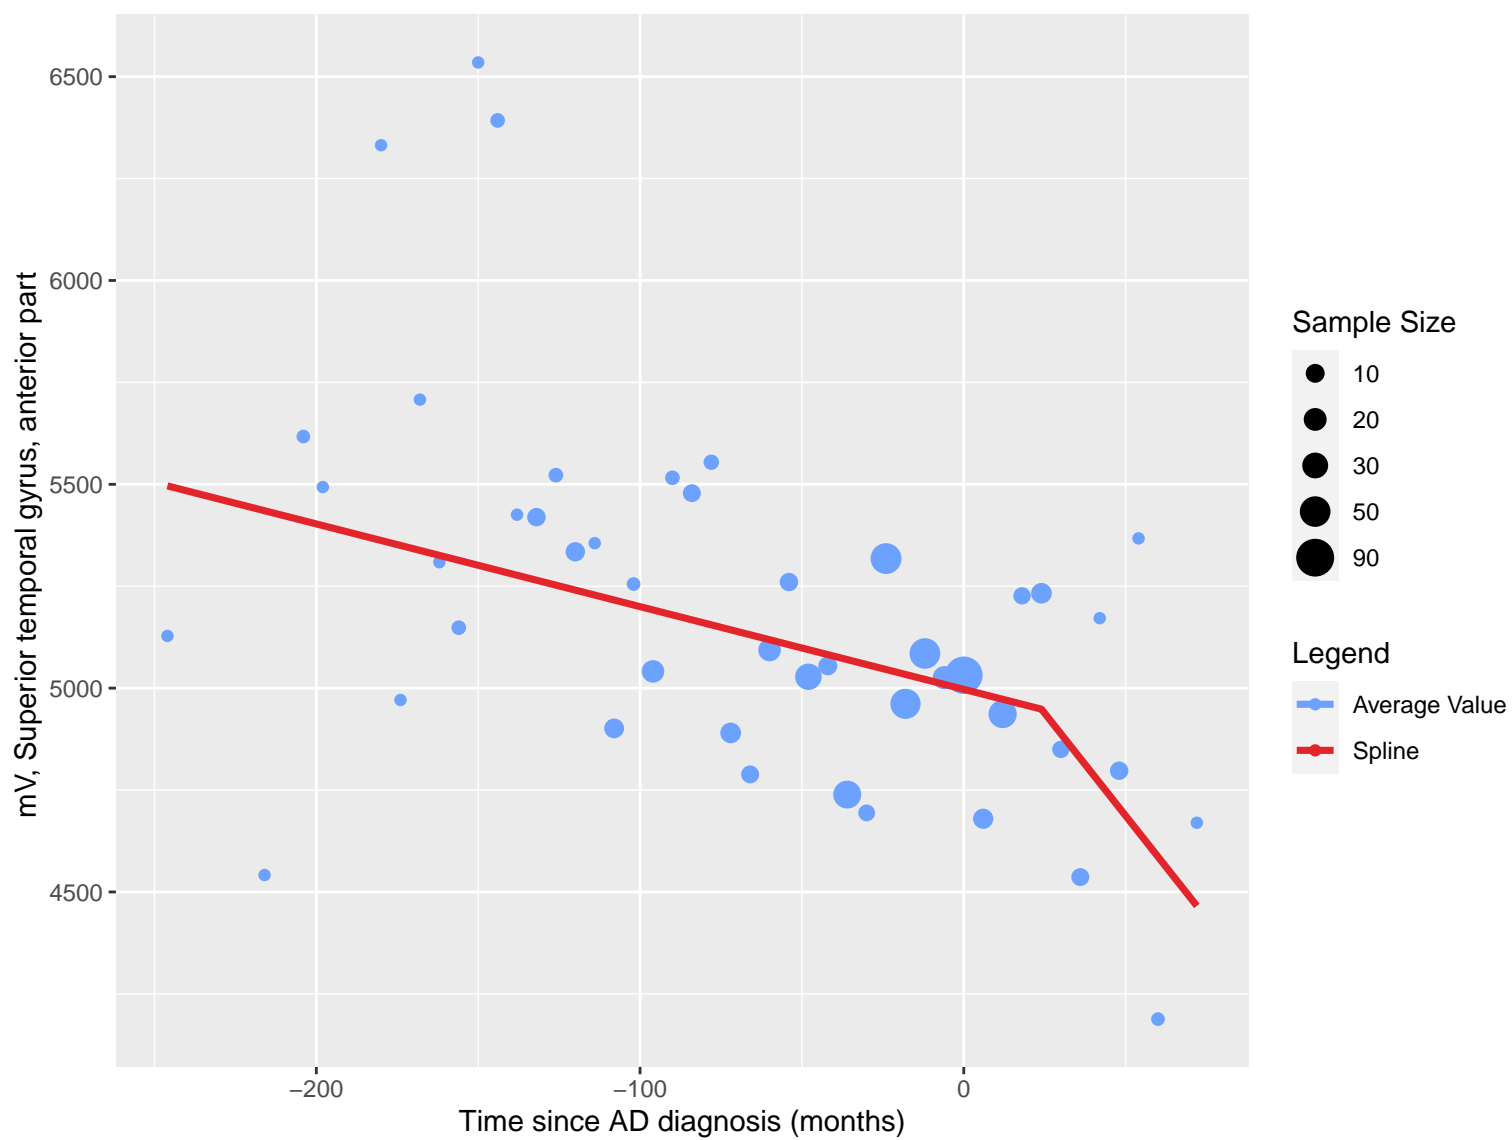

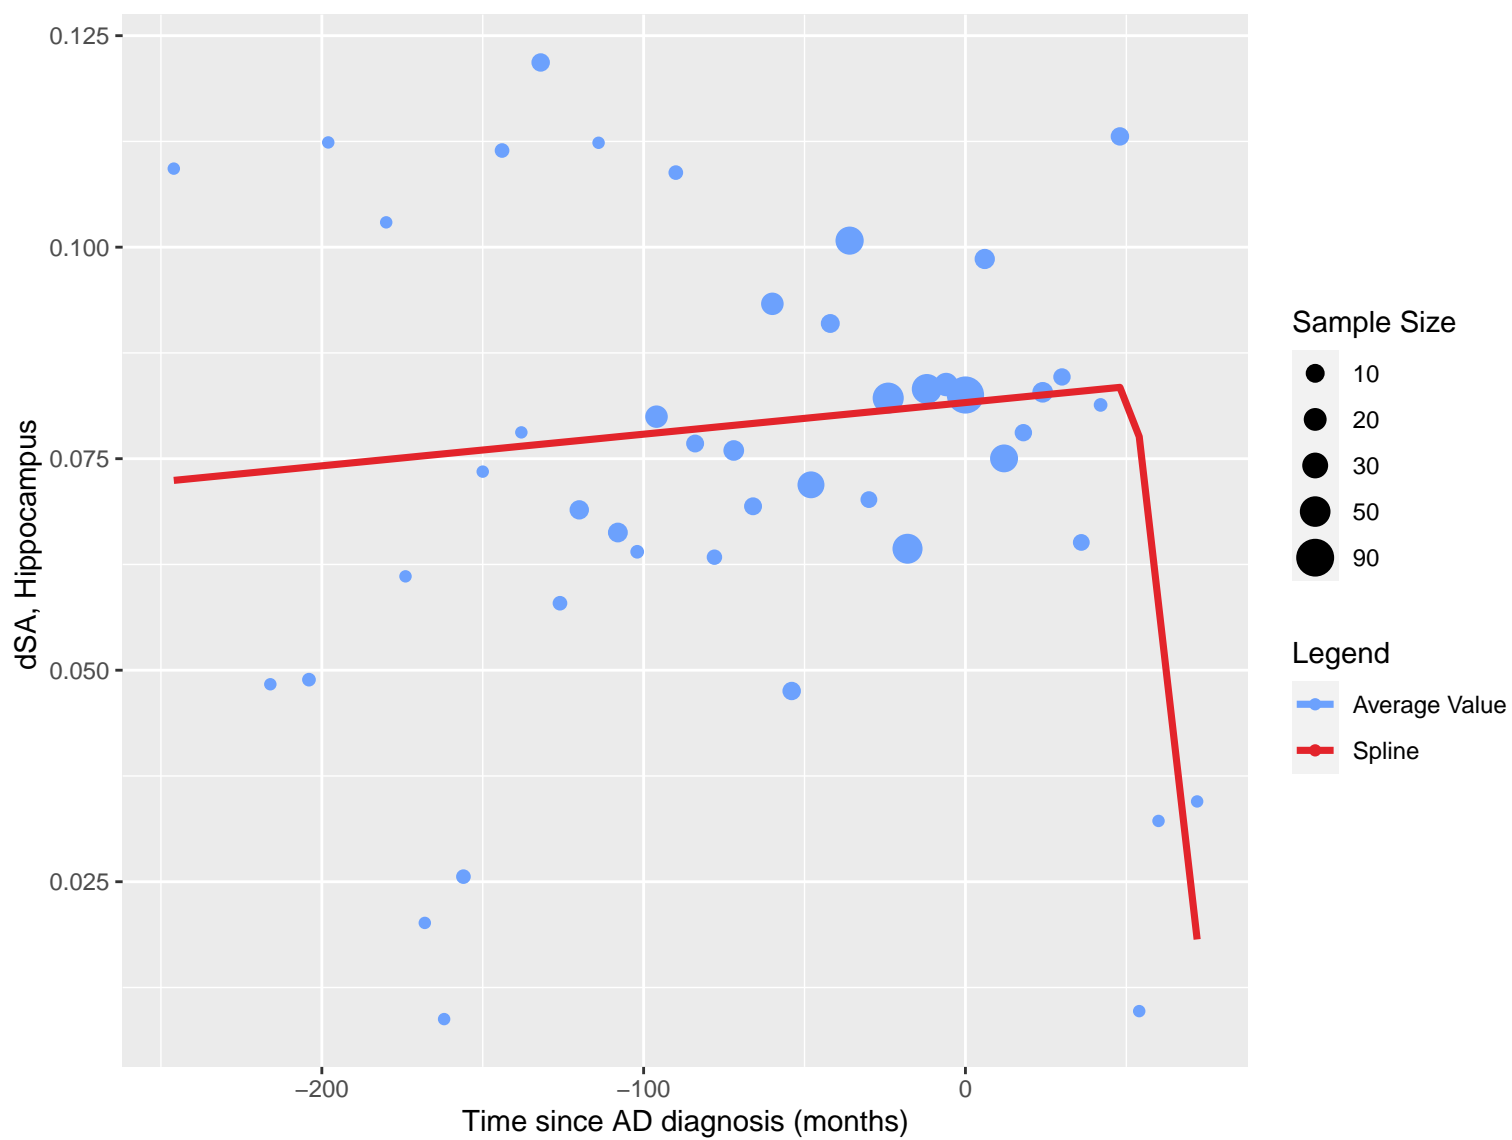

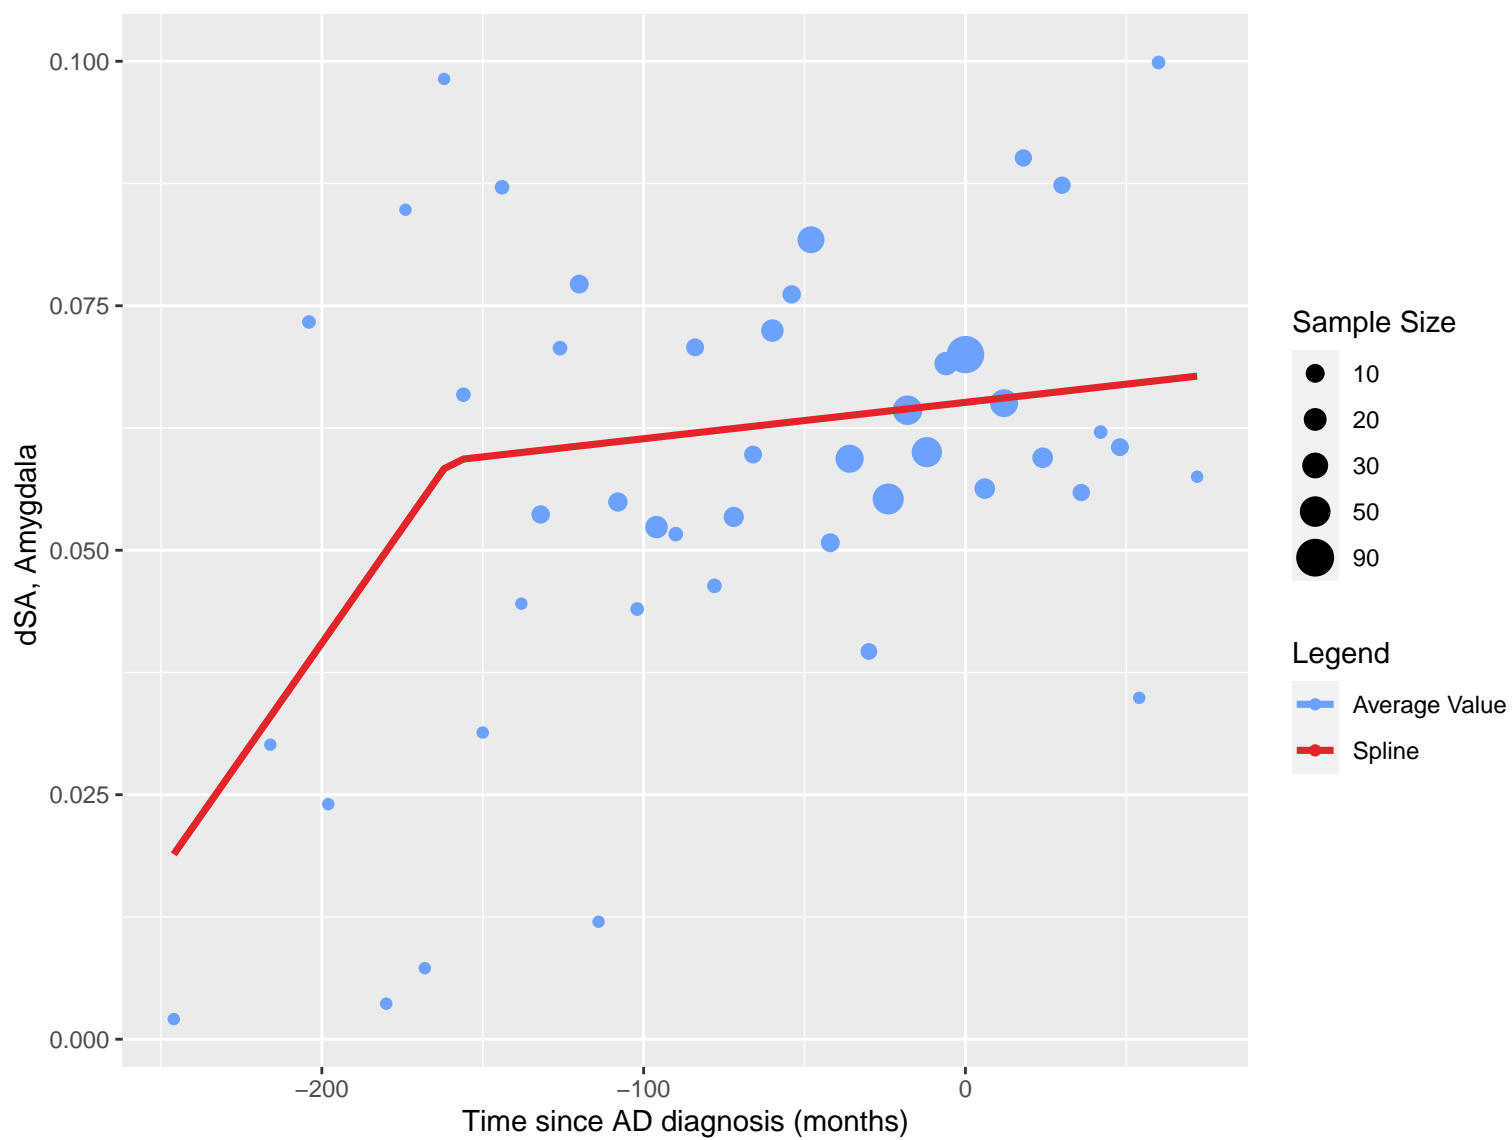



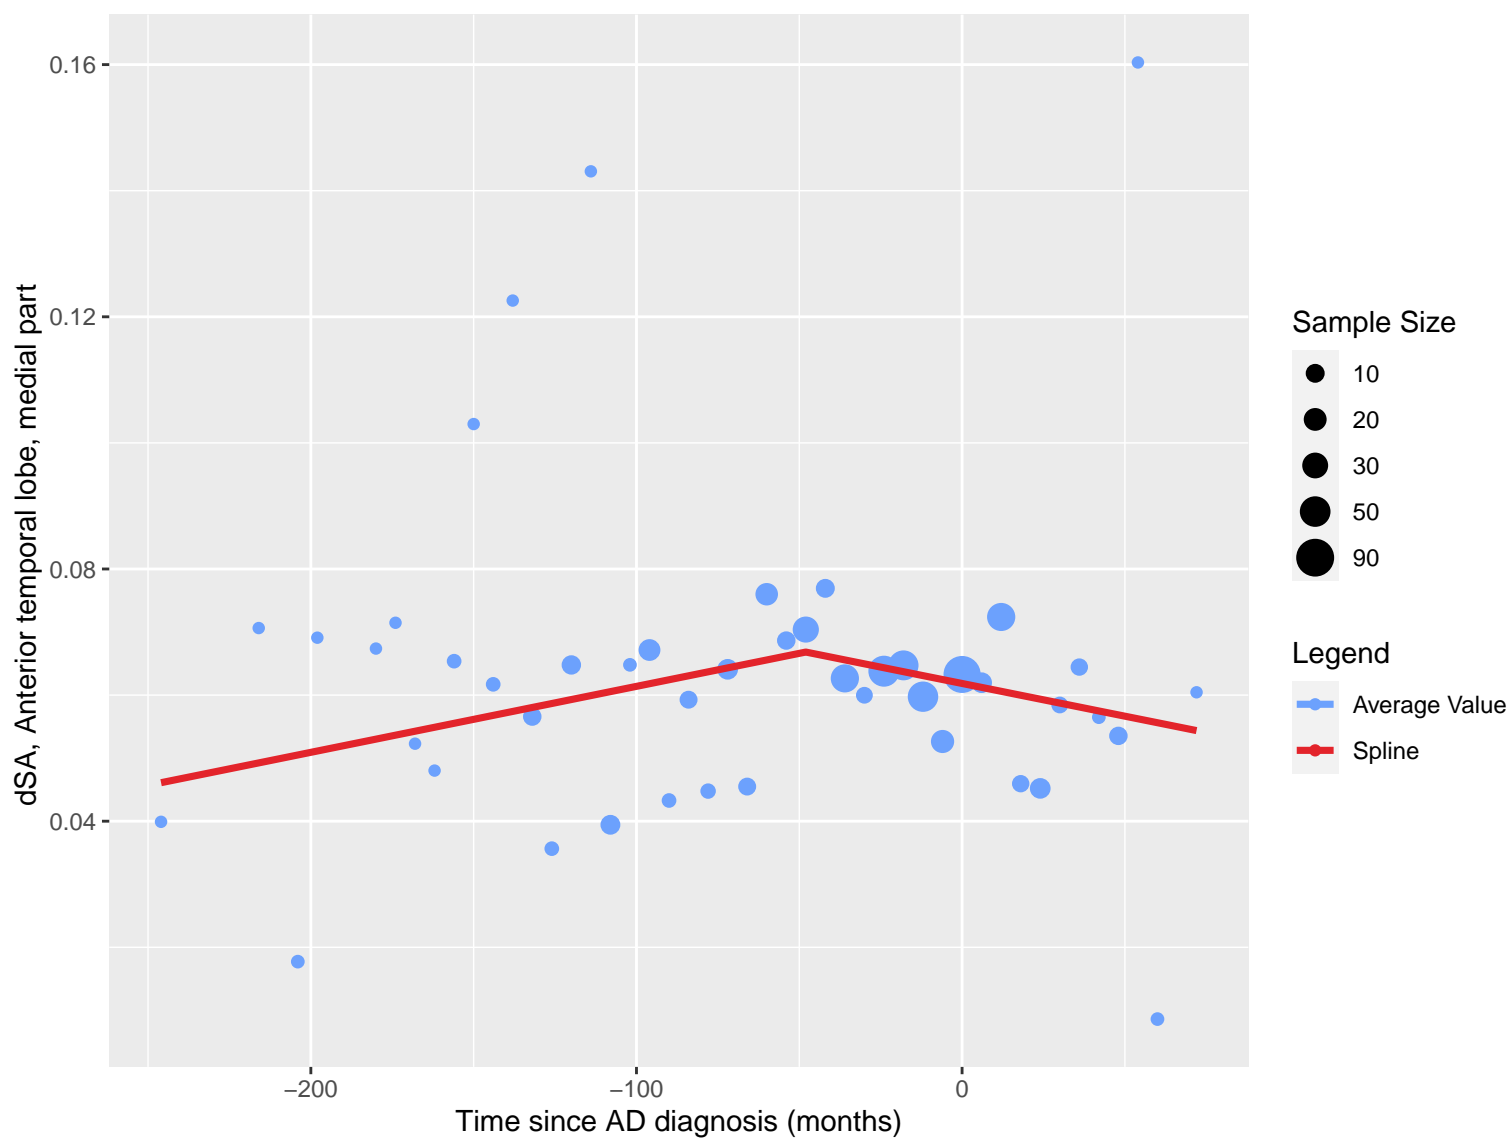

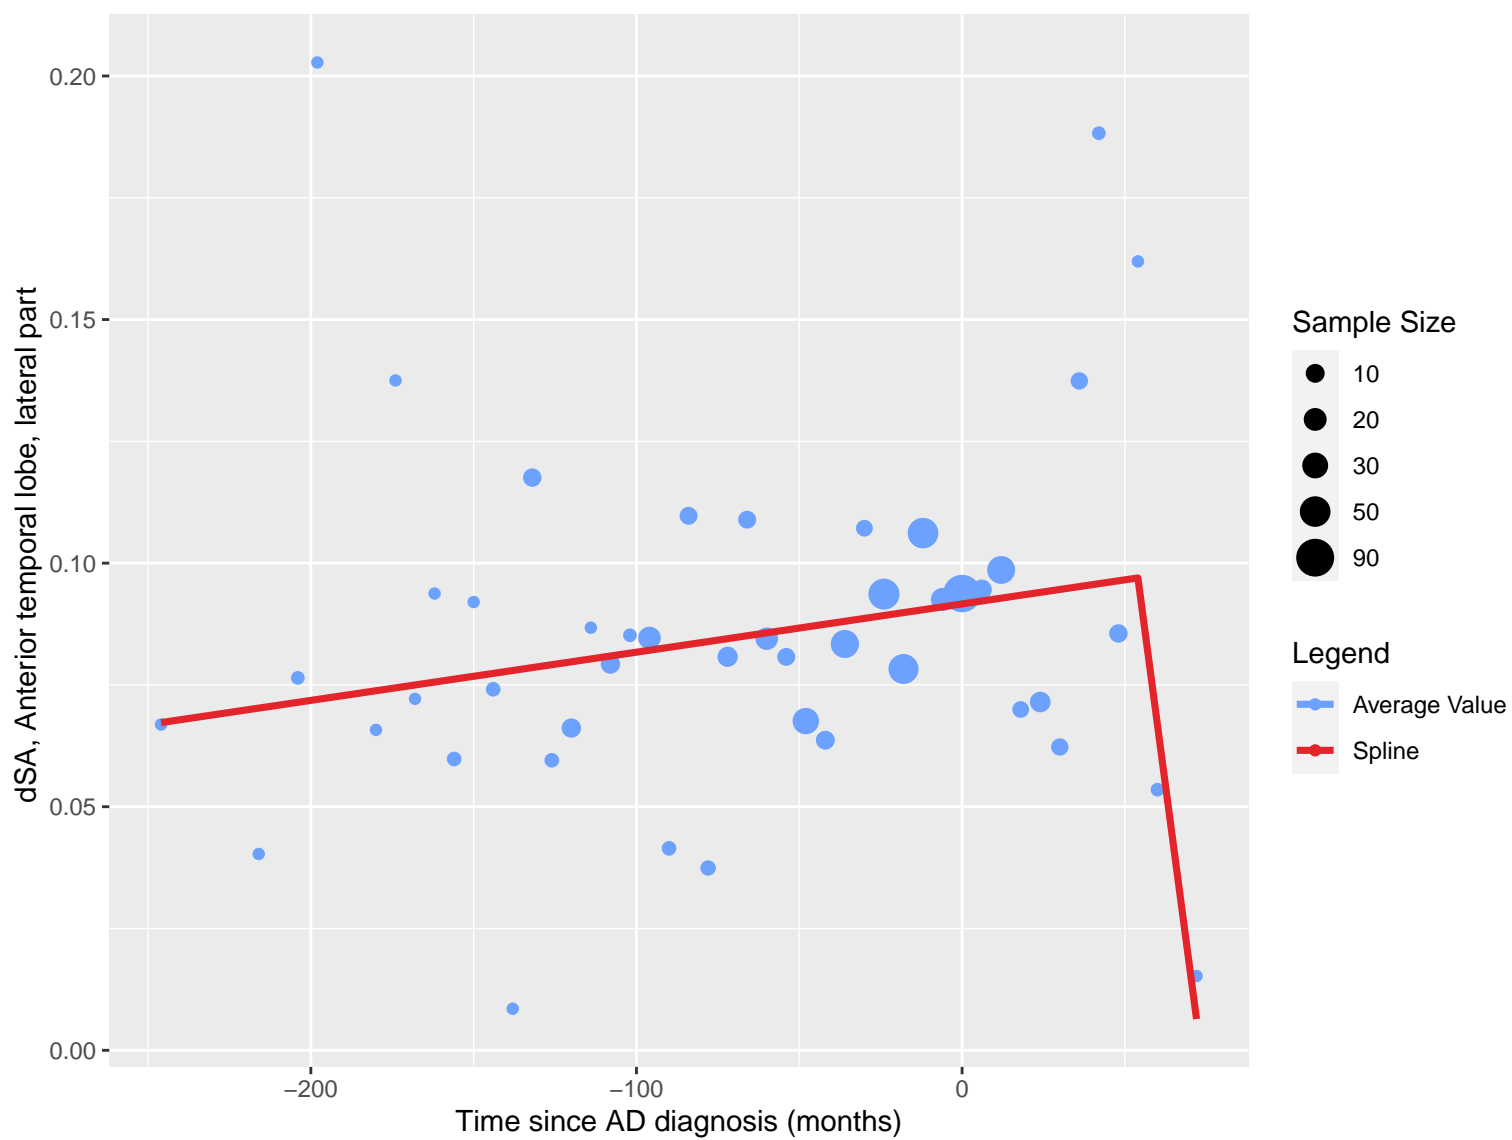

dSA, Gyri parahippocampalis et ambiens

0.100

0.075

0.050

0.025

-200

-100

0

Time since AD diagnosis (months)

Sample Size

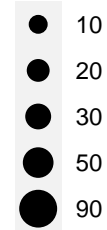

Legend

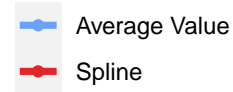

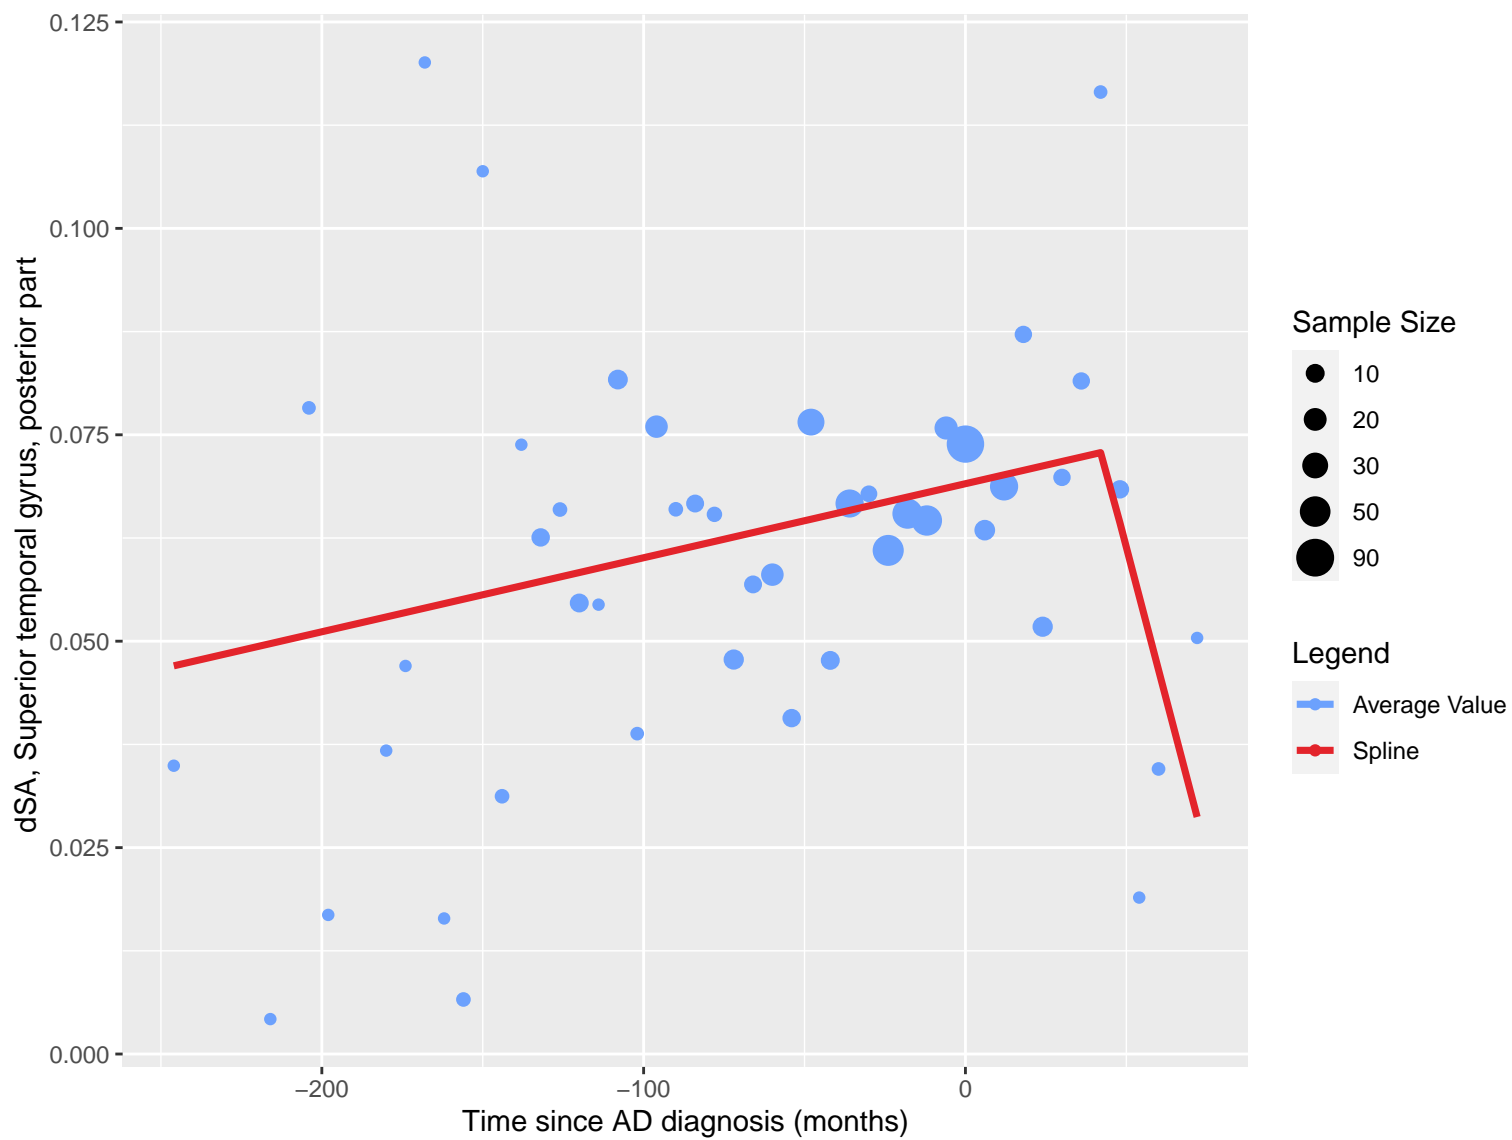

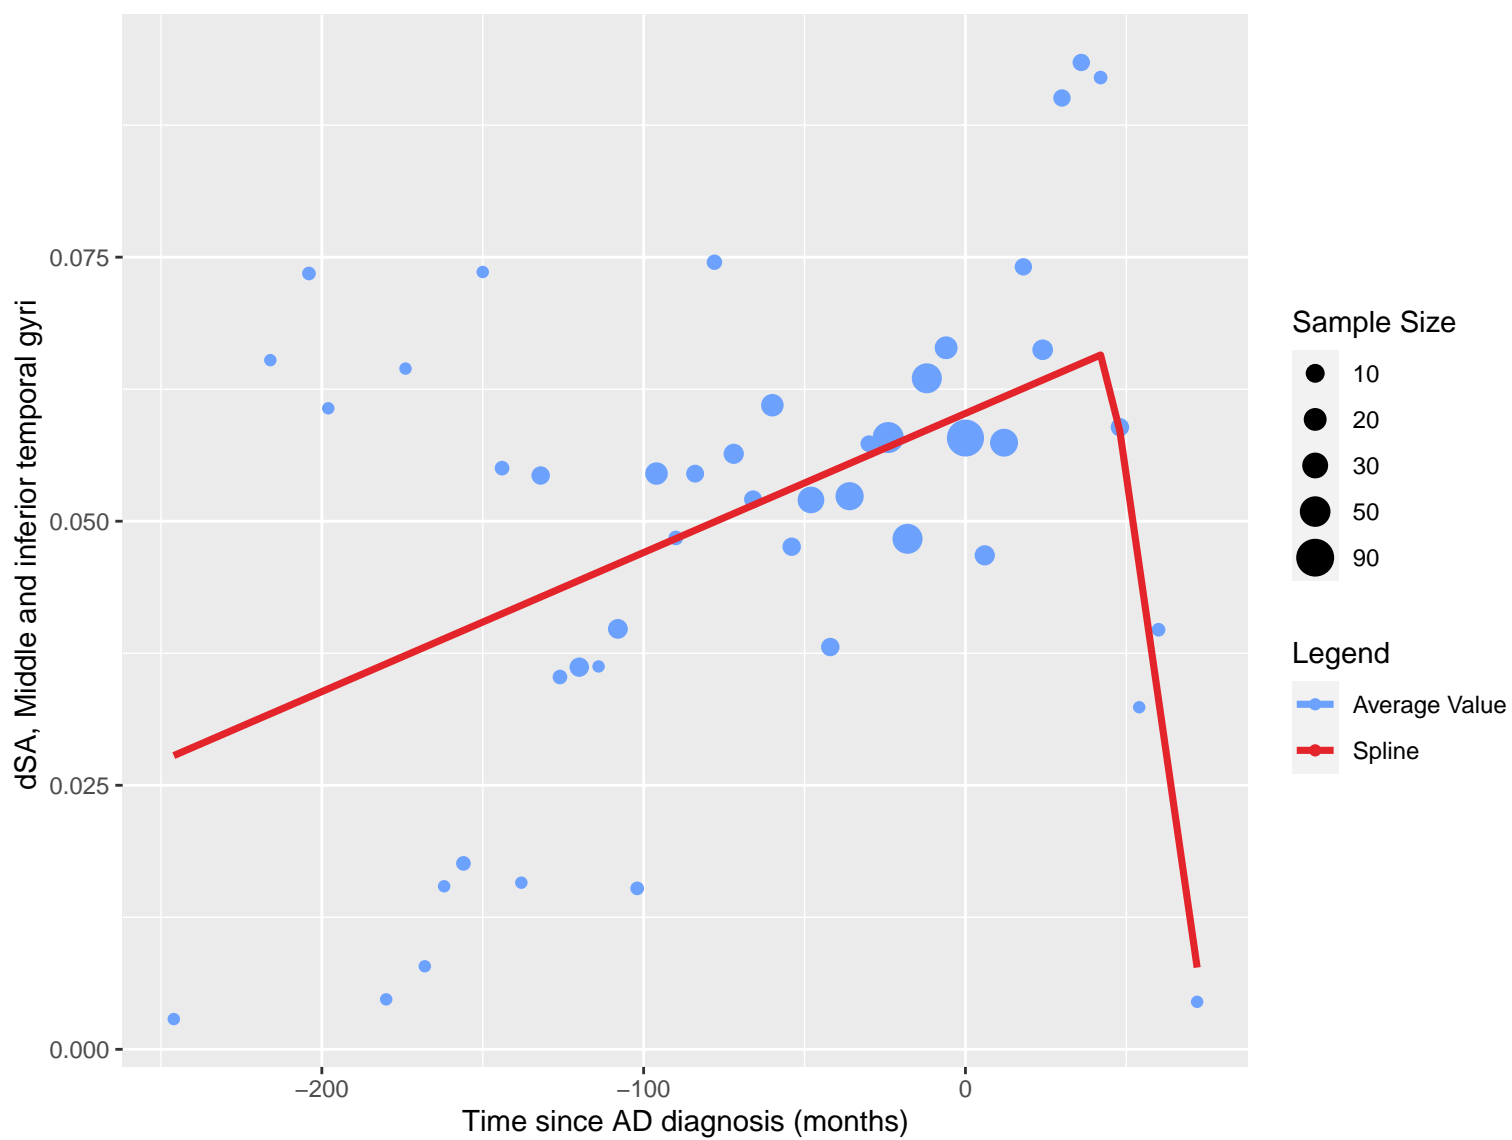

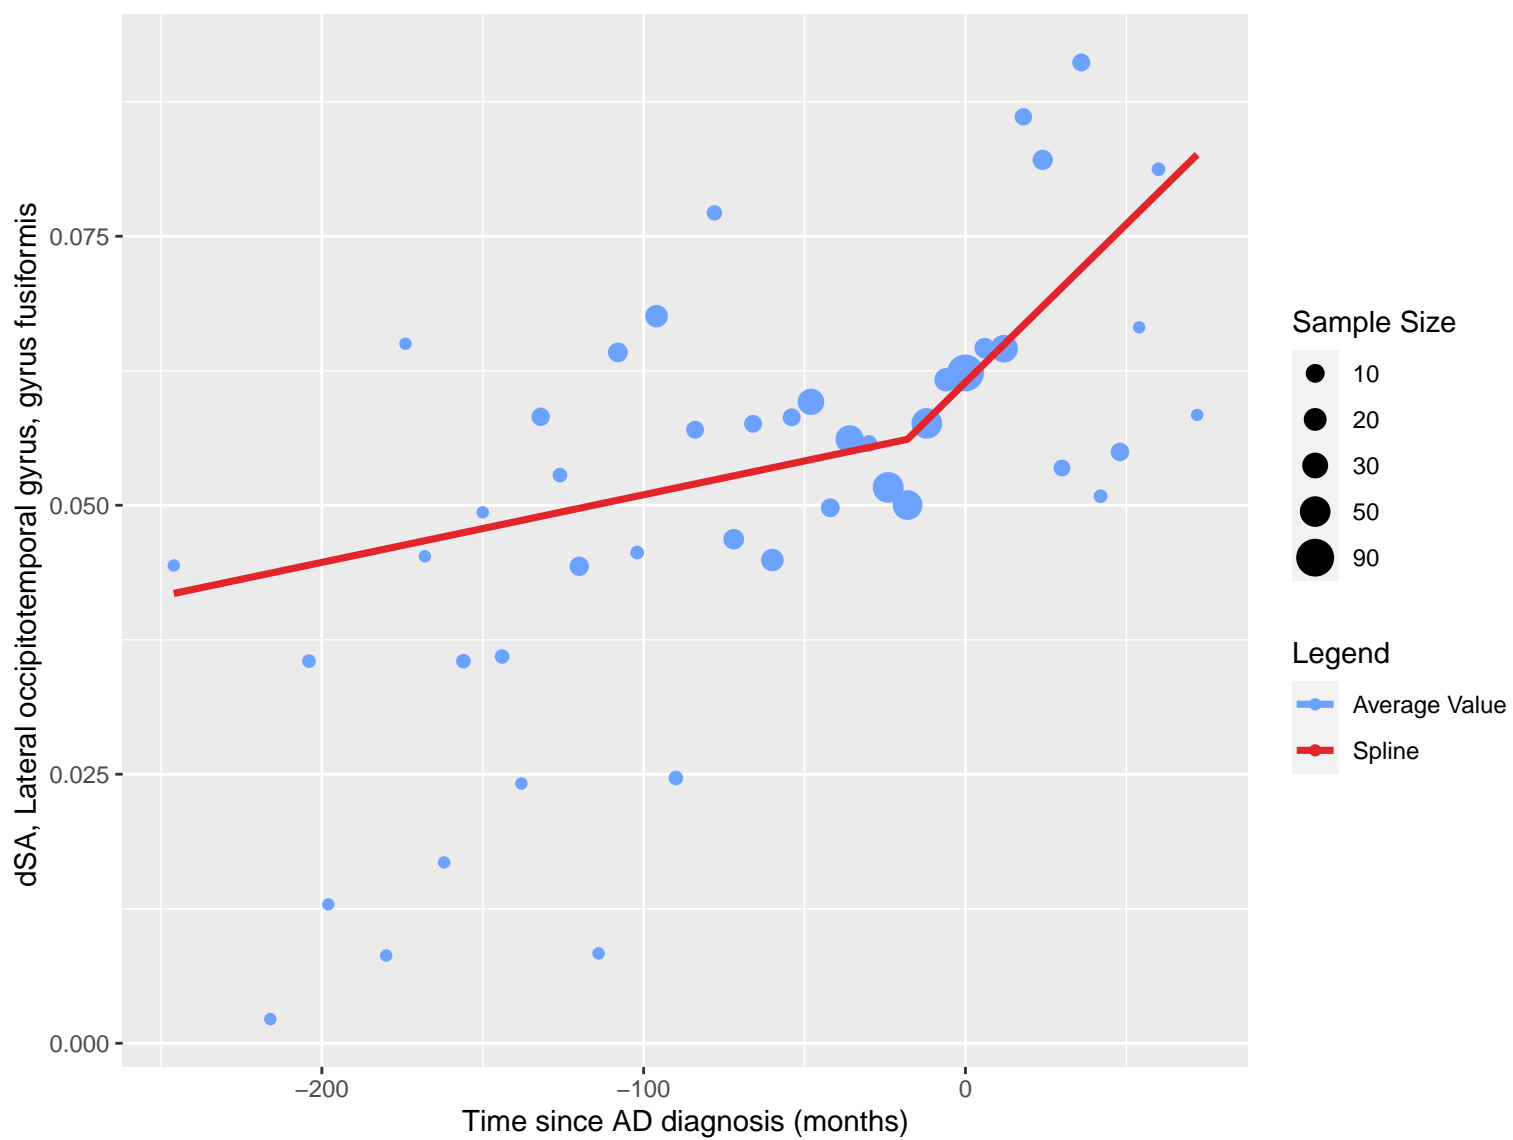

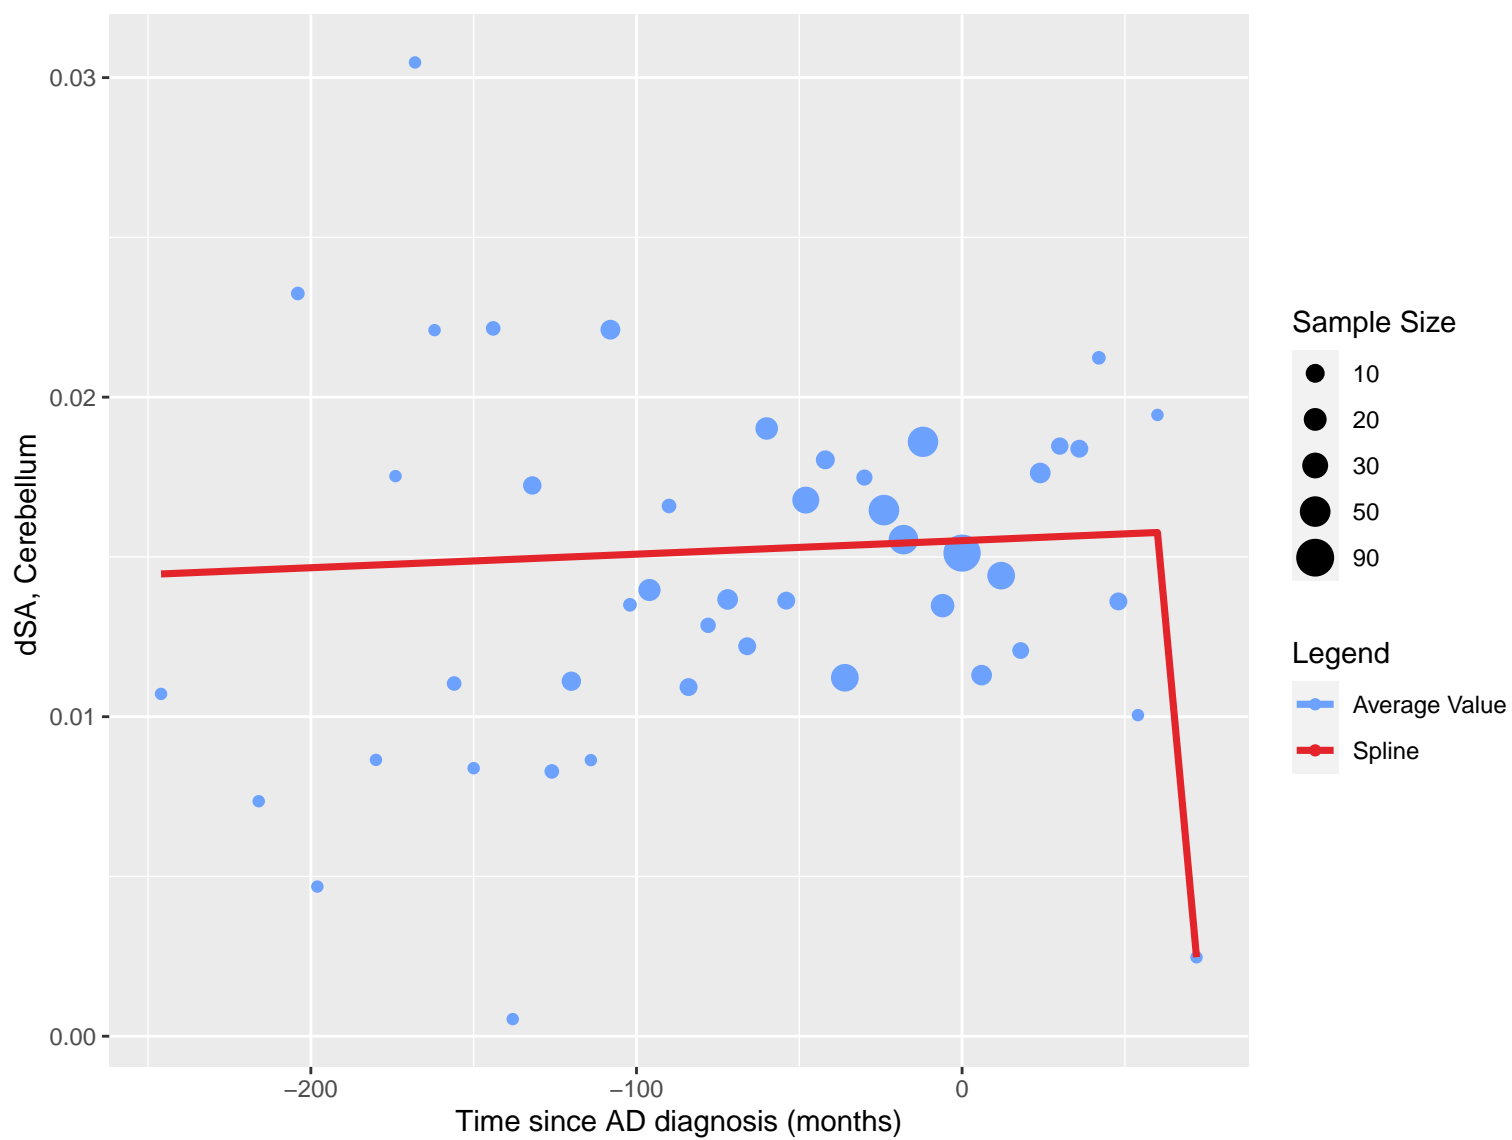

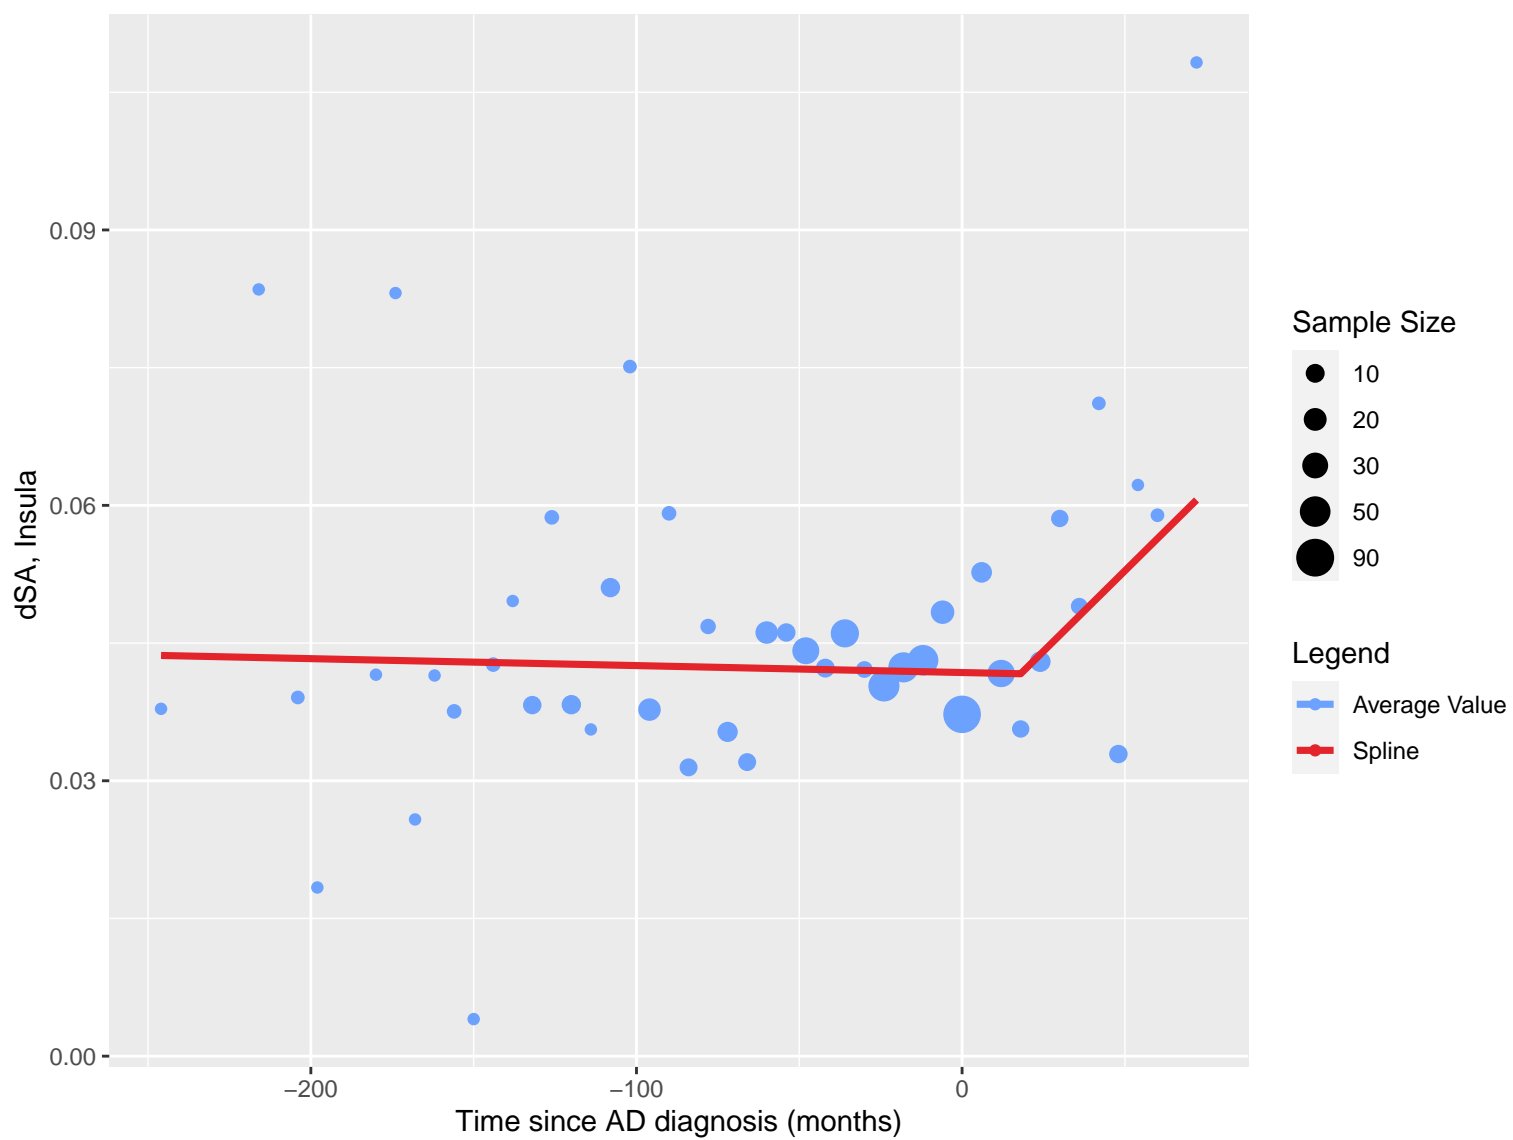



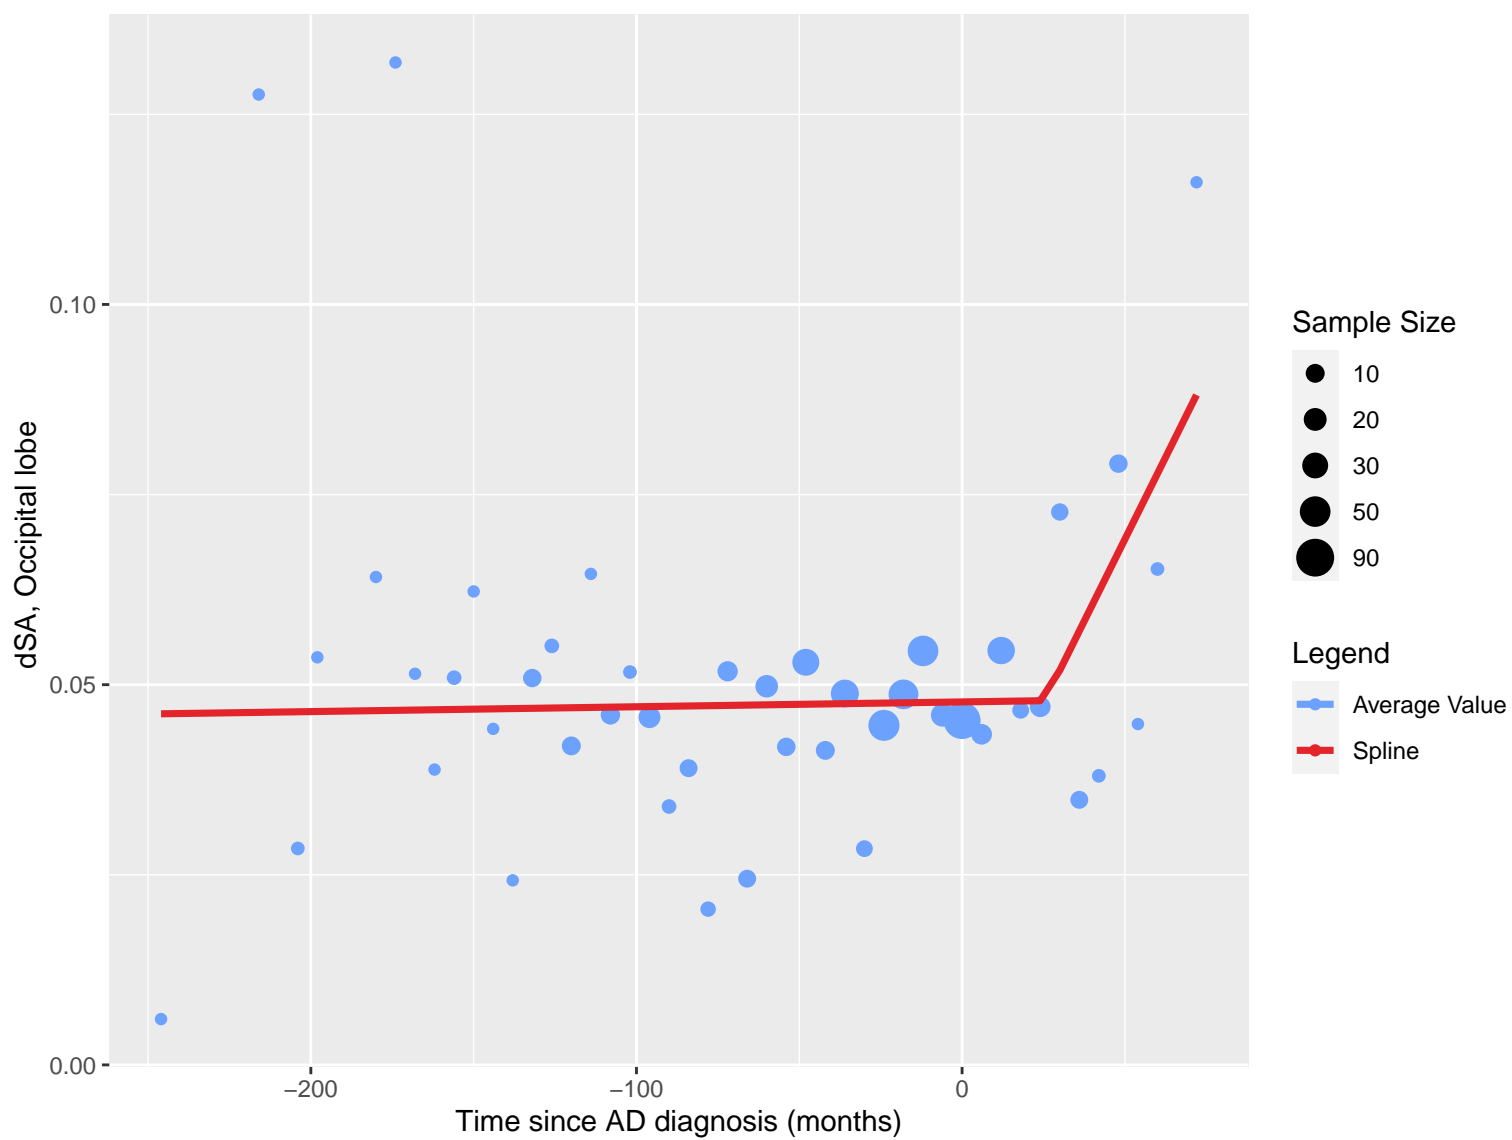

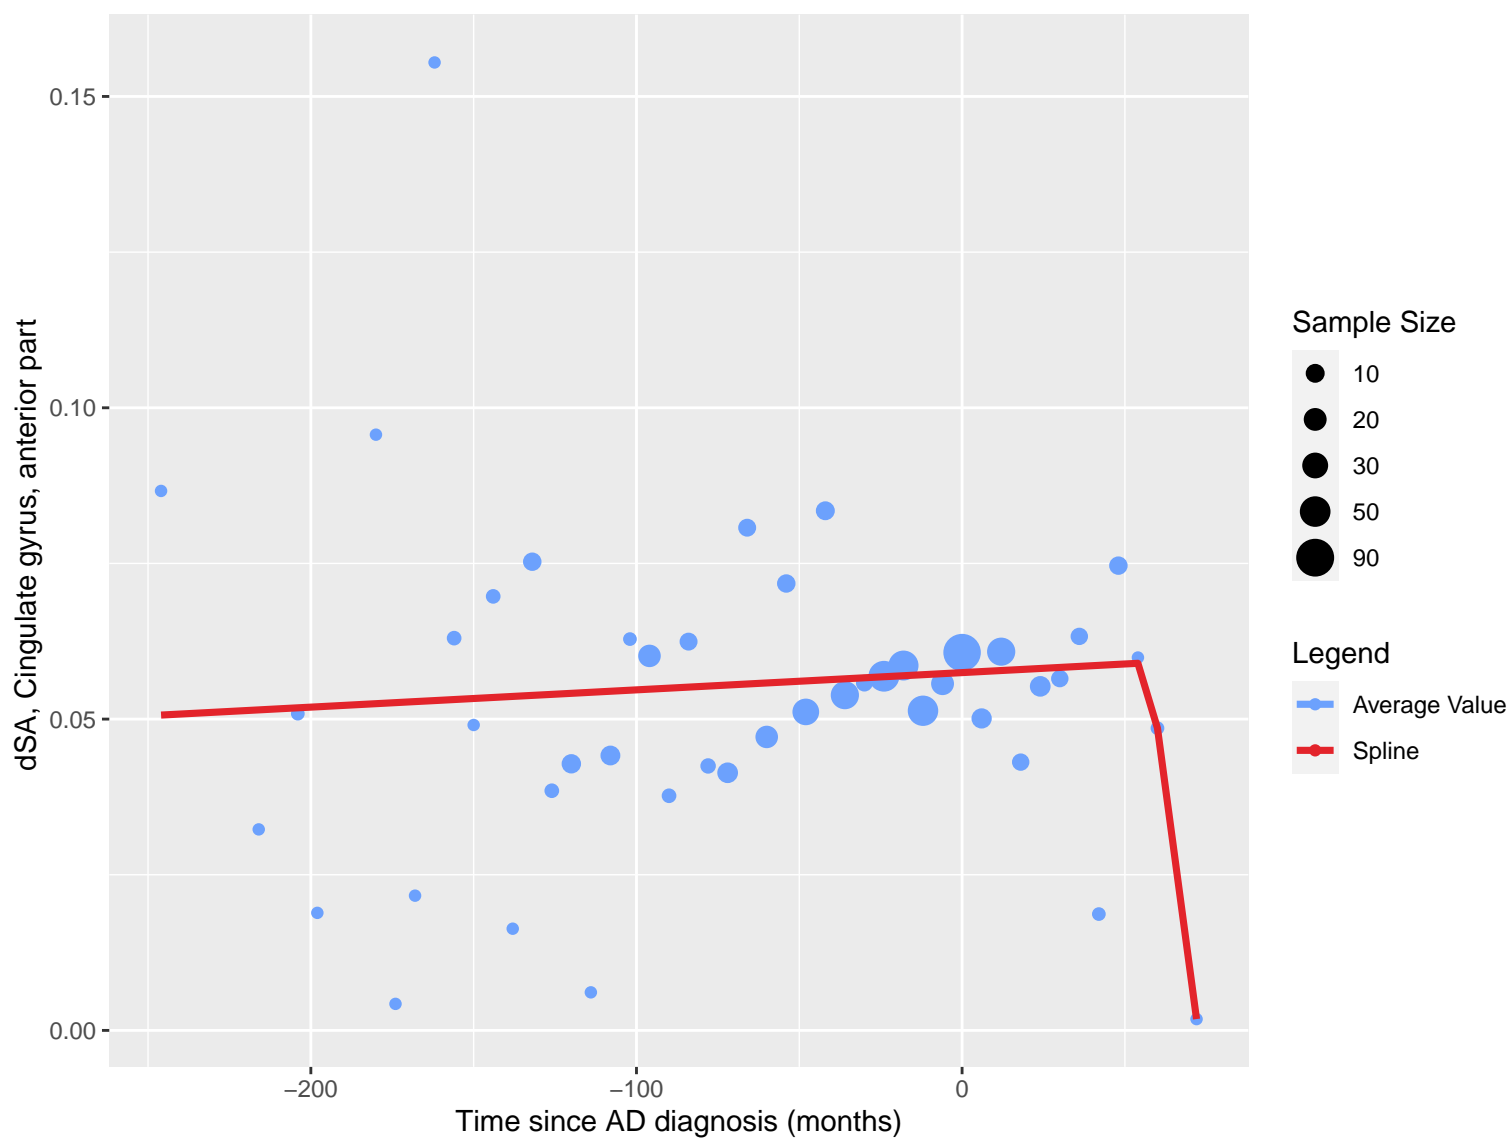

dSA, Cingulate gyrus, posterior part

0.08

0.06

0.04

0.02

-200

-100

0

Time since AD diagnosis (months)

Sample Size



Legend

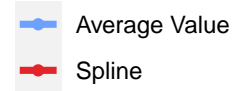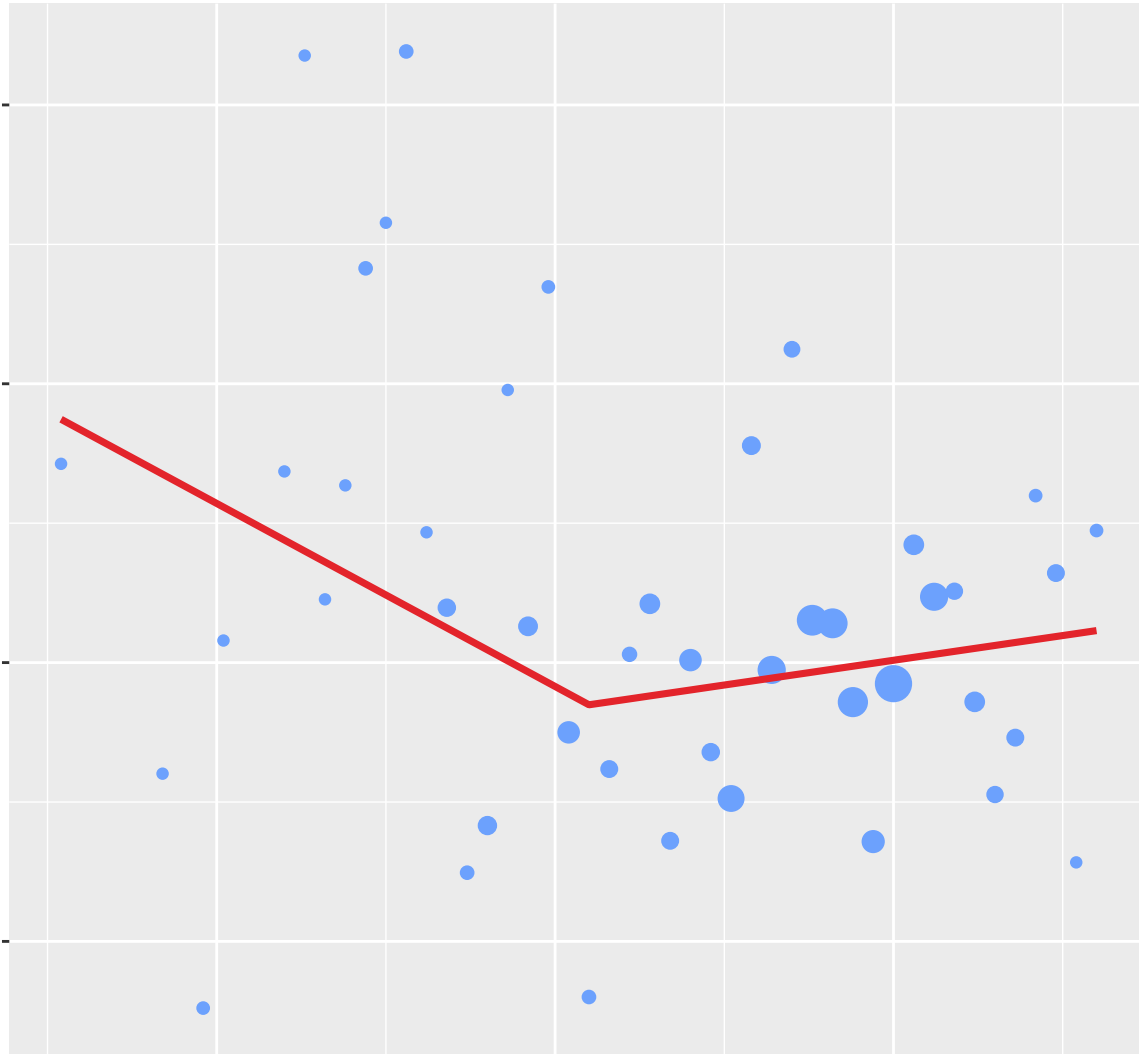

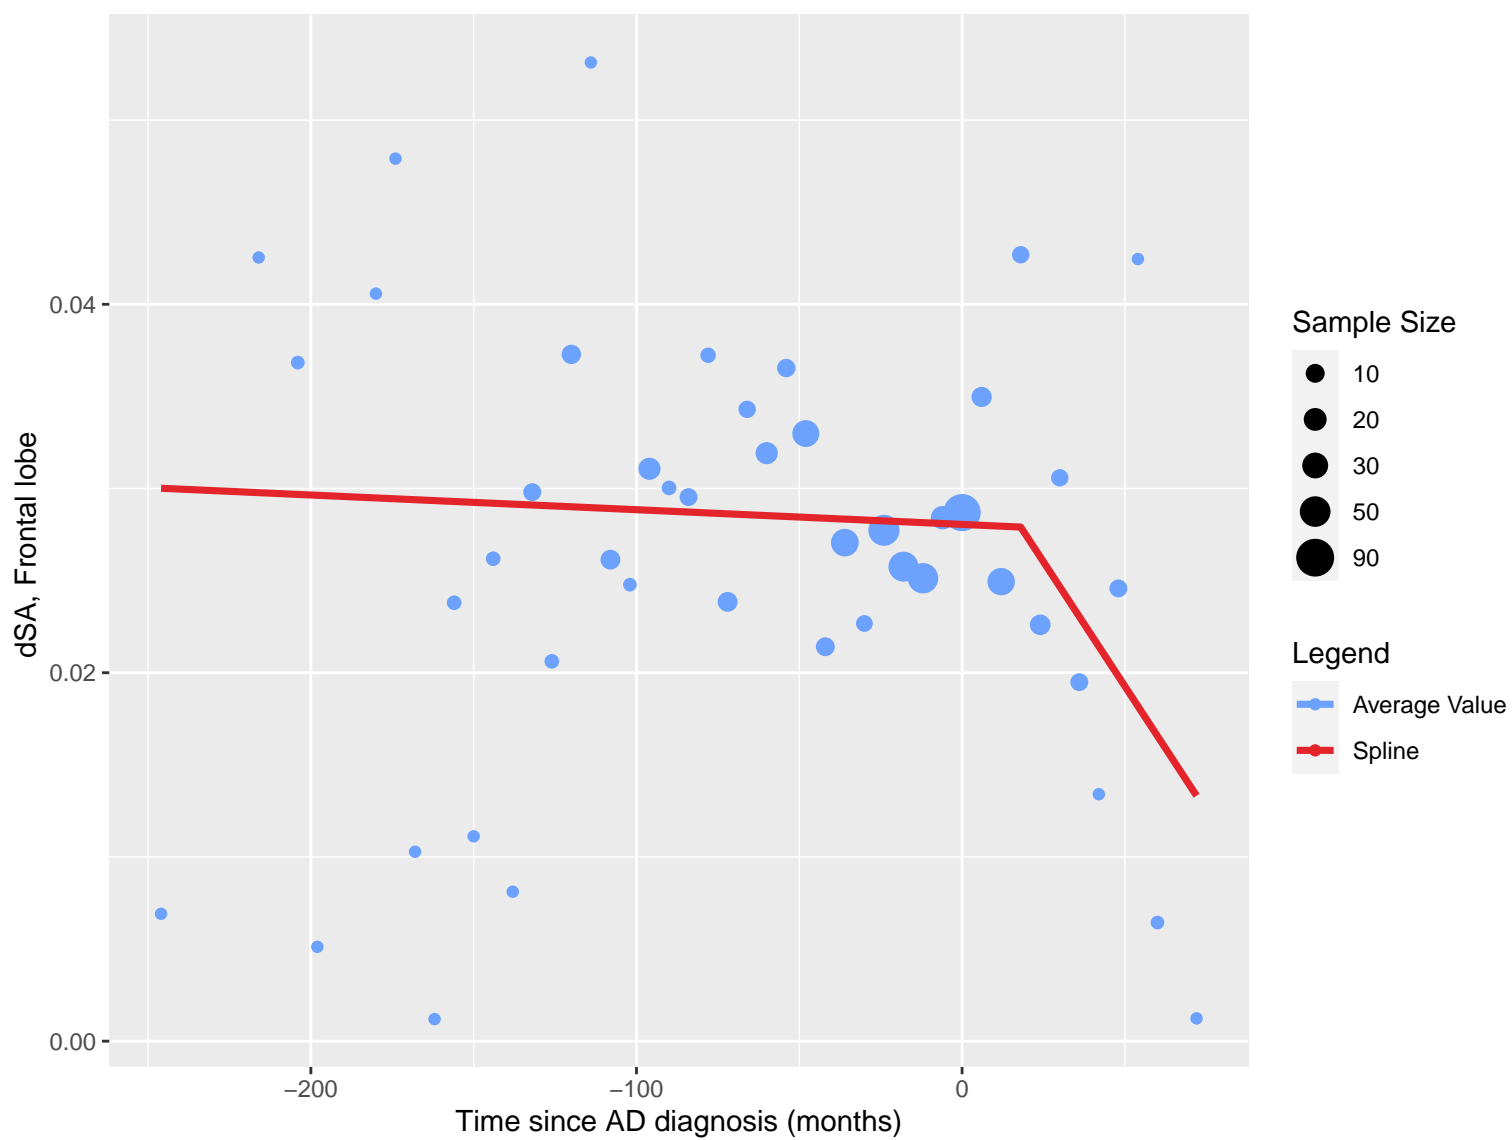

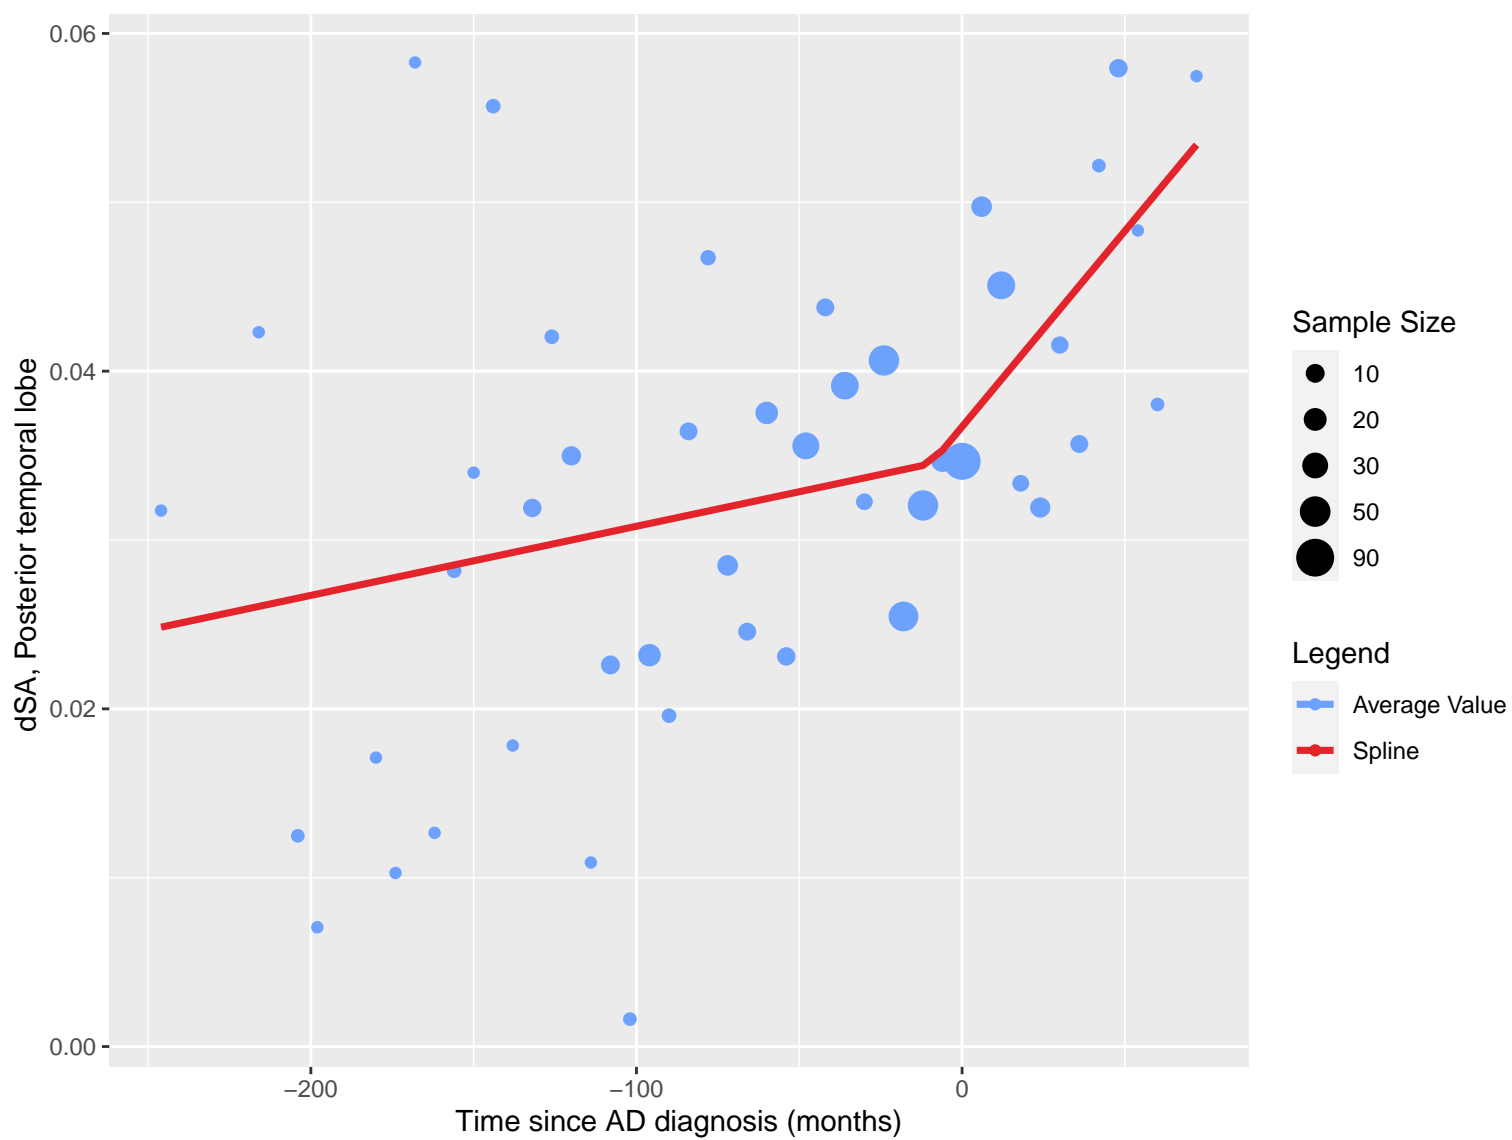

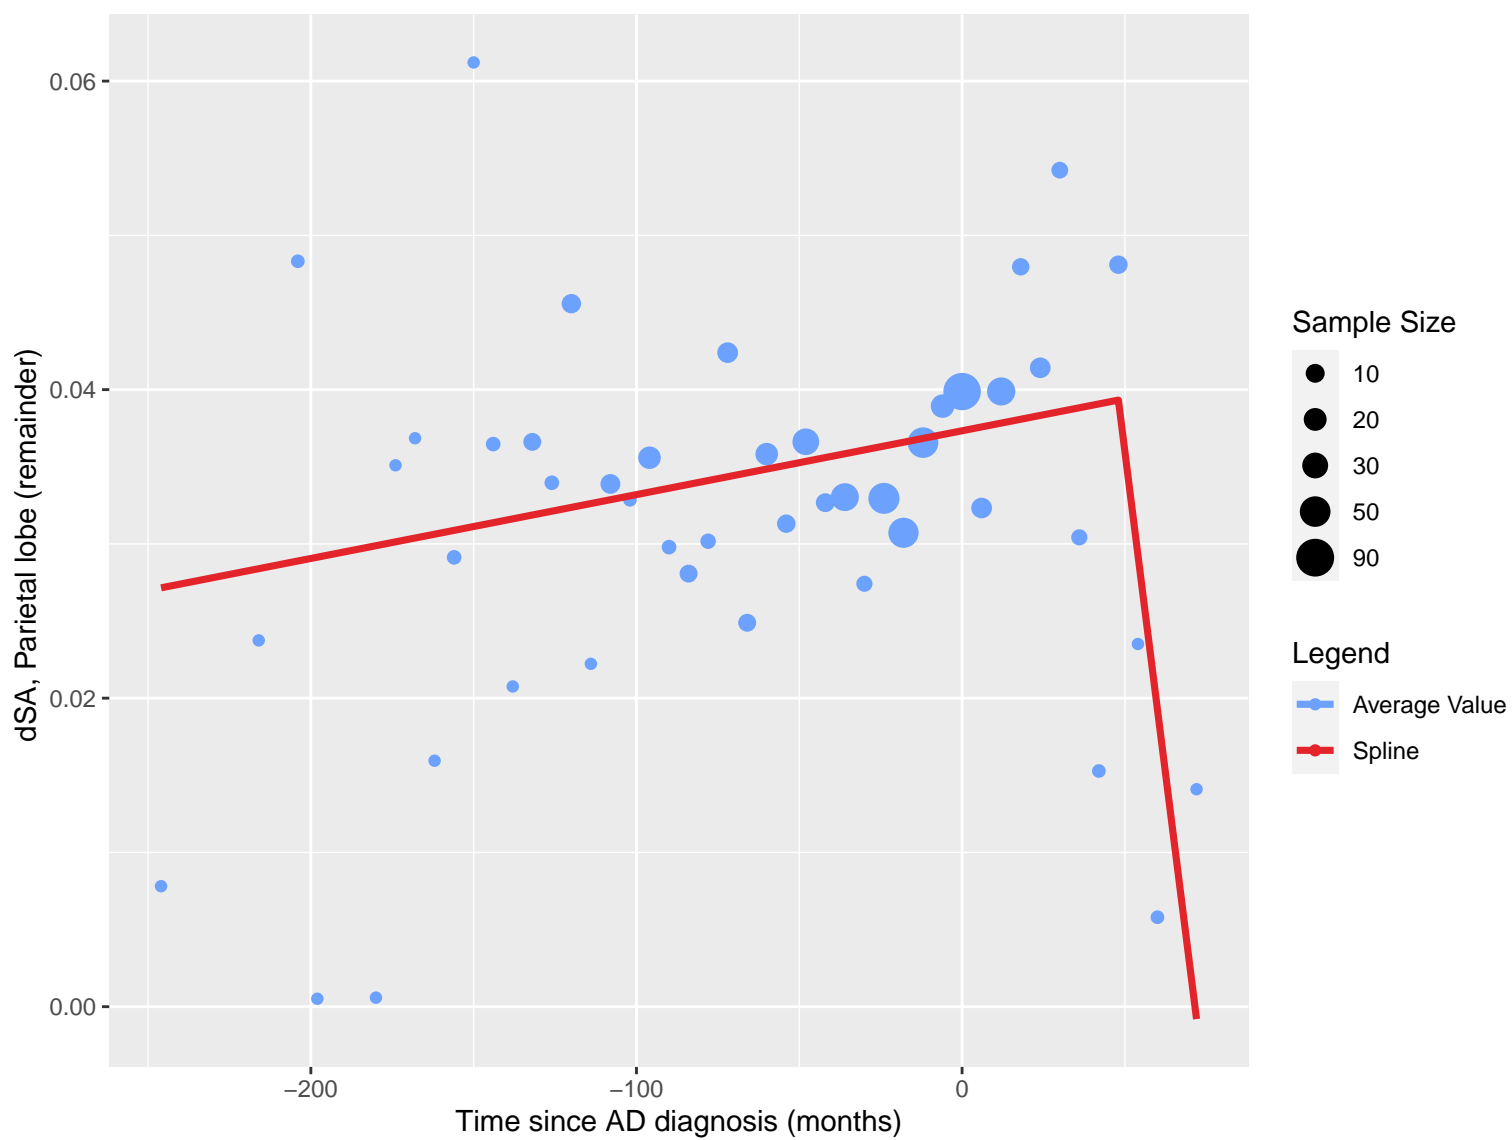

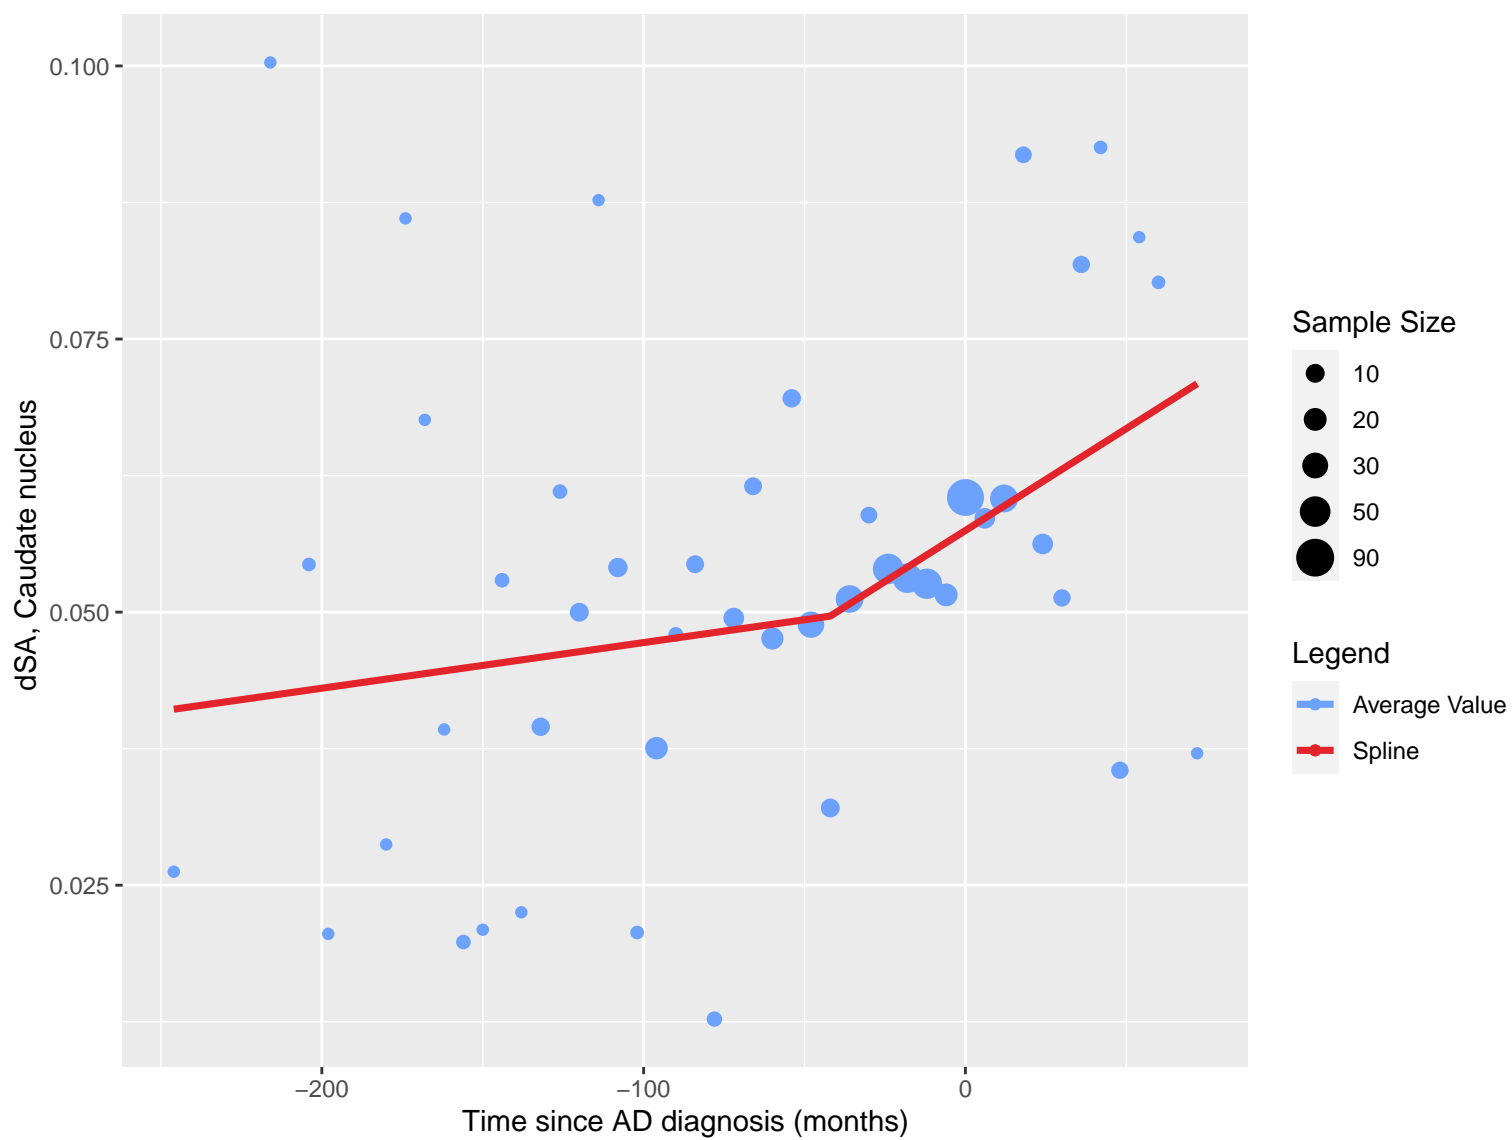

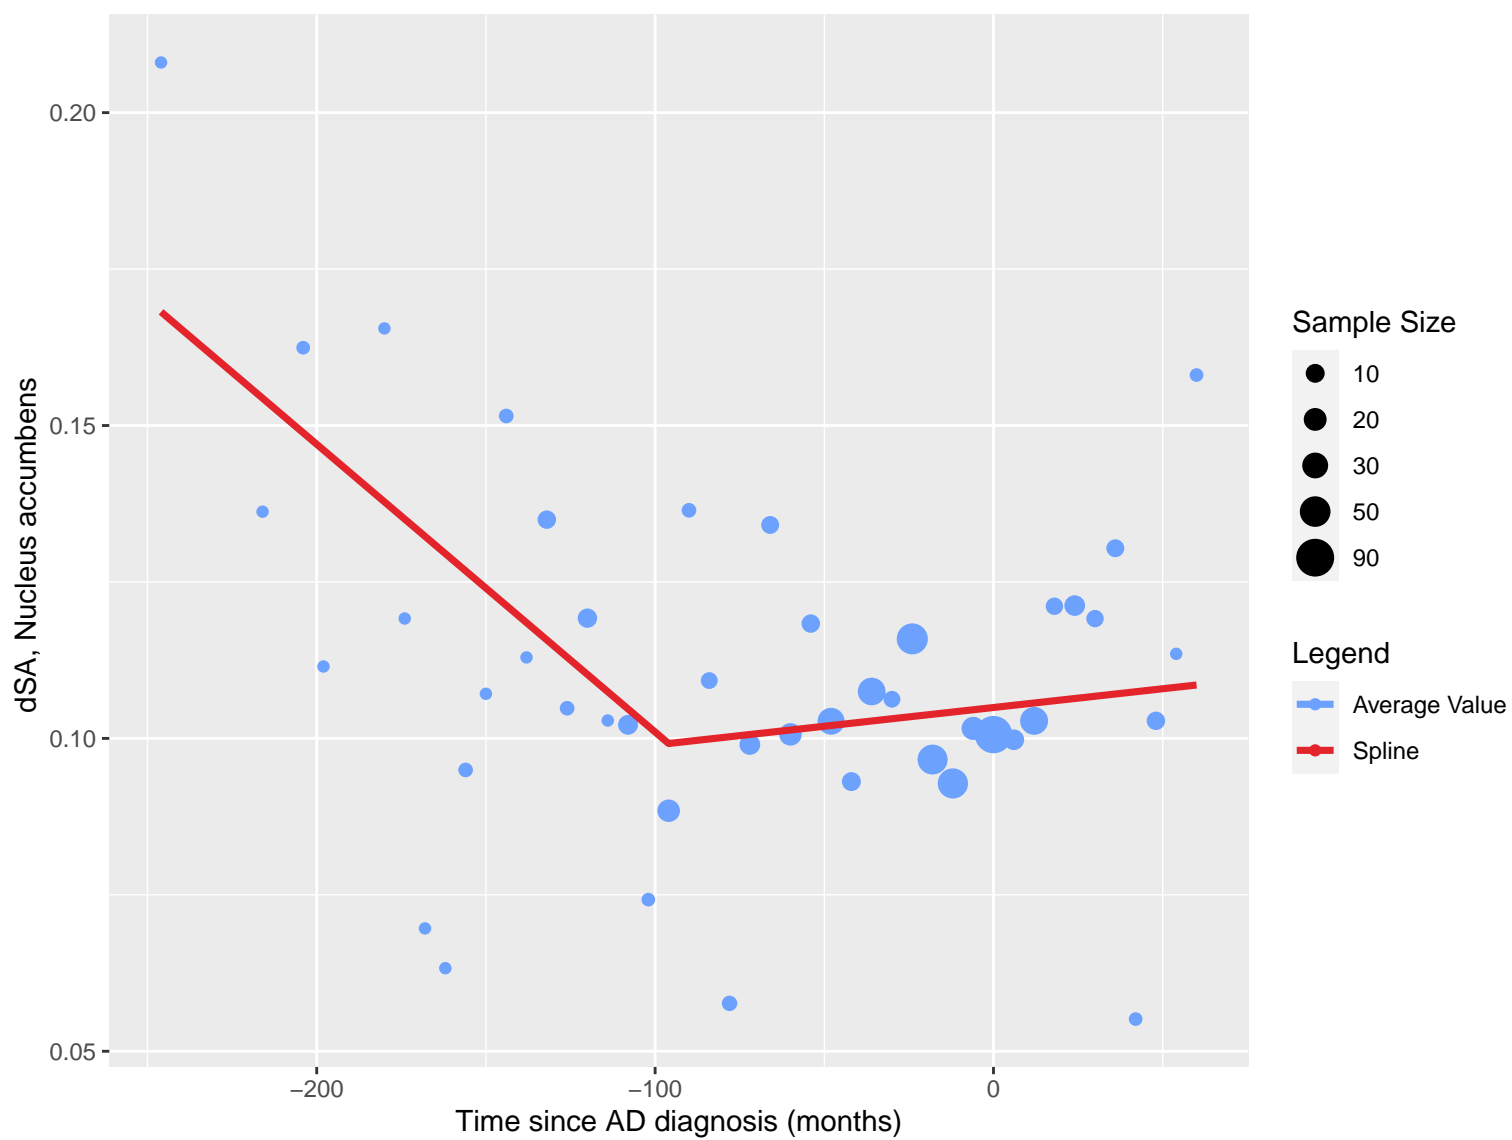



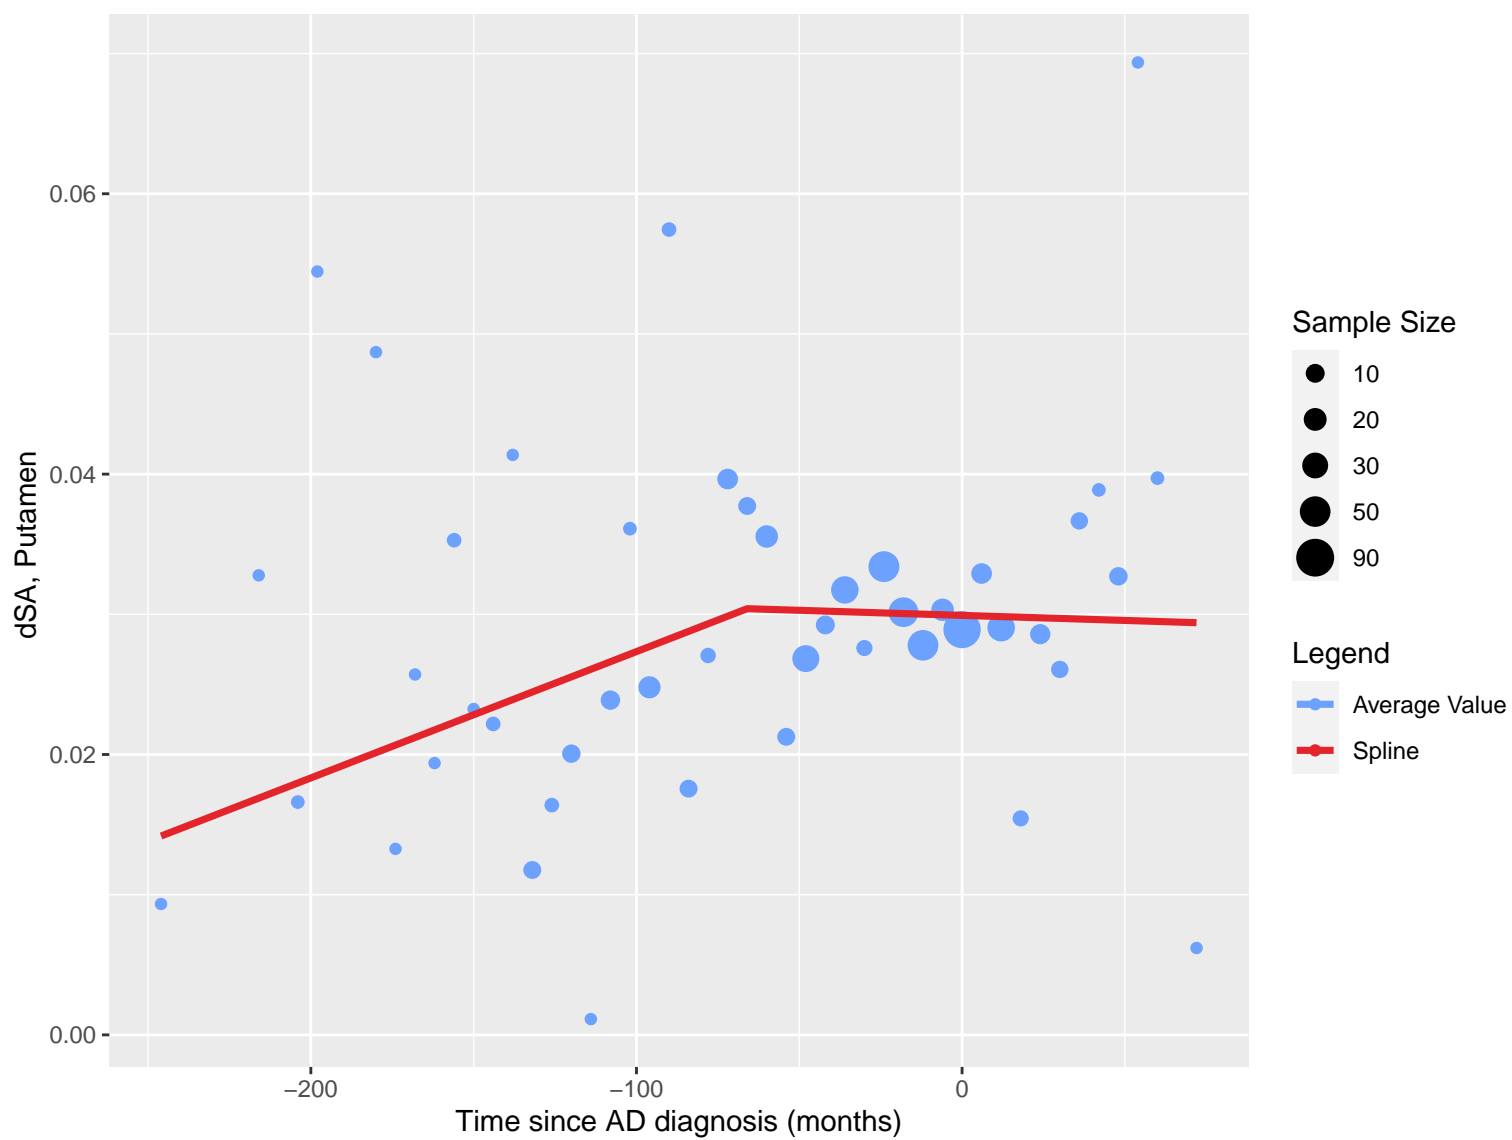

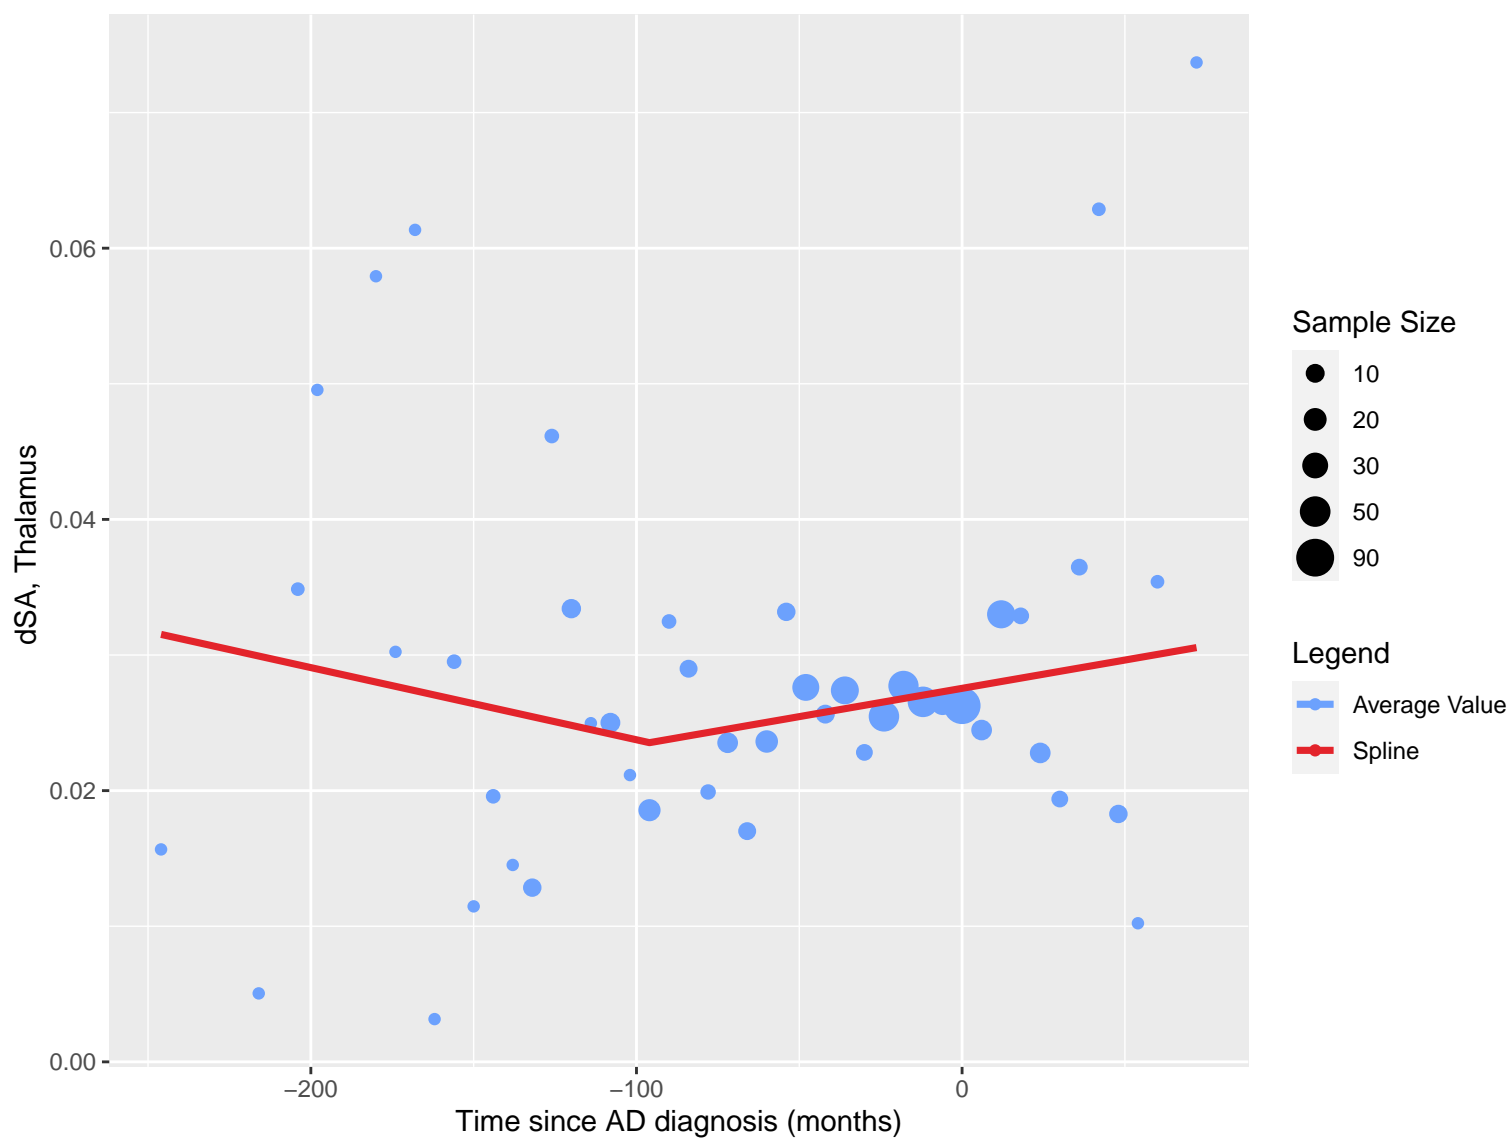

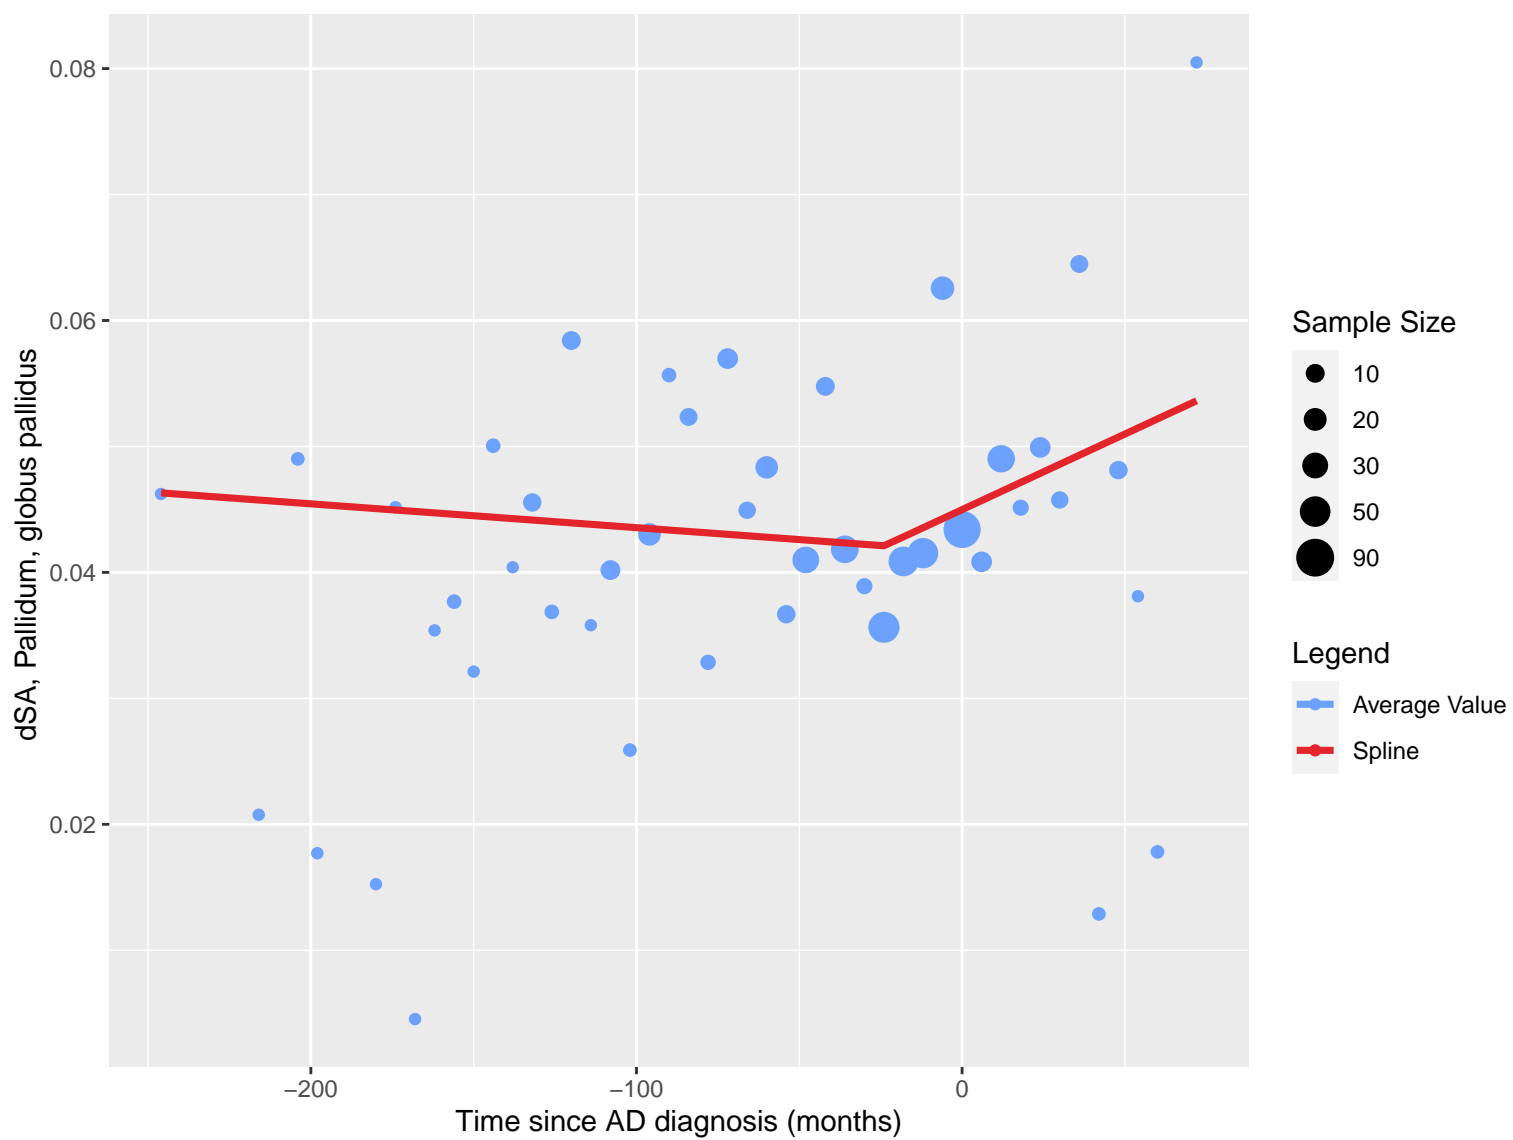

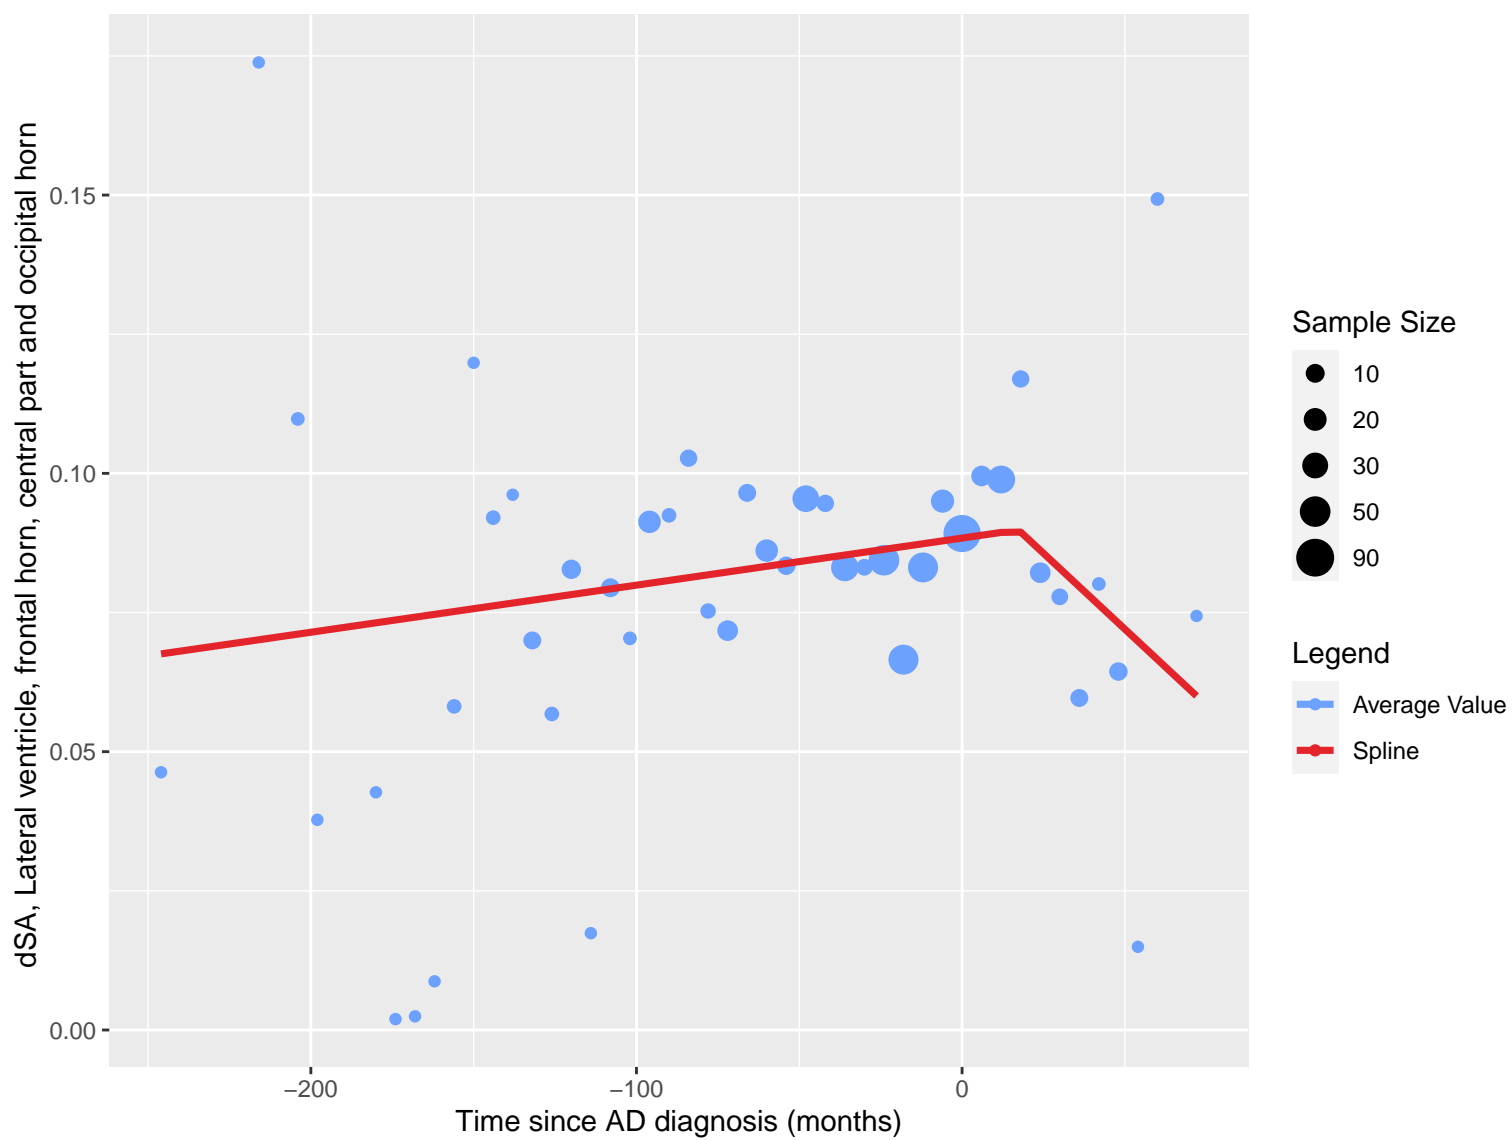

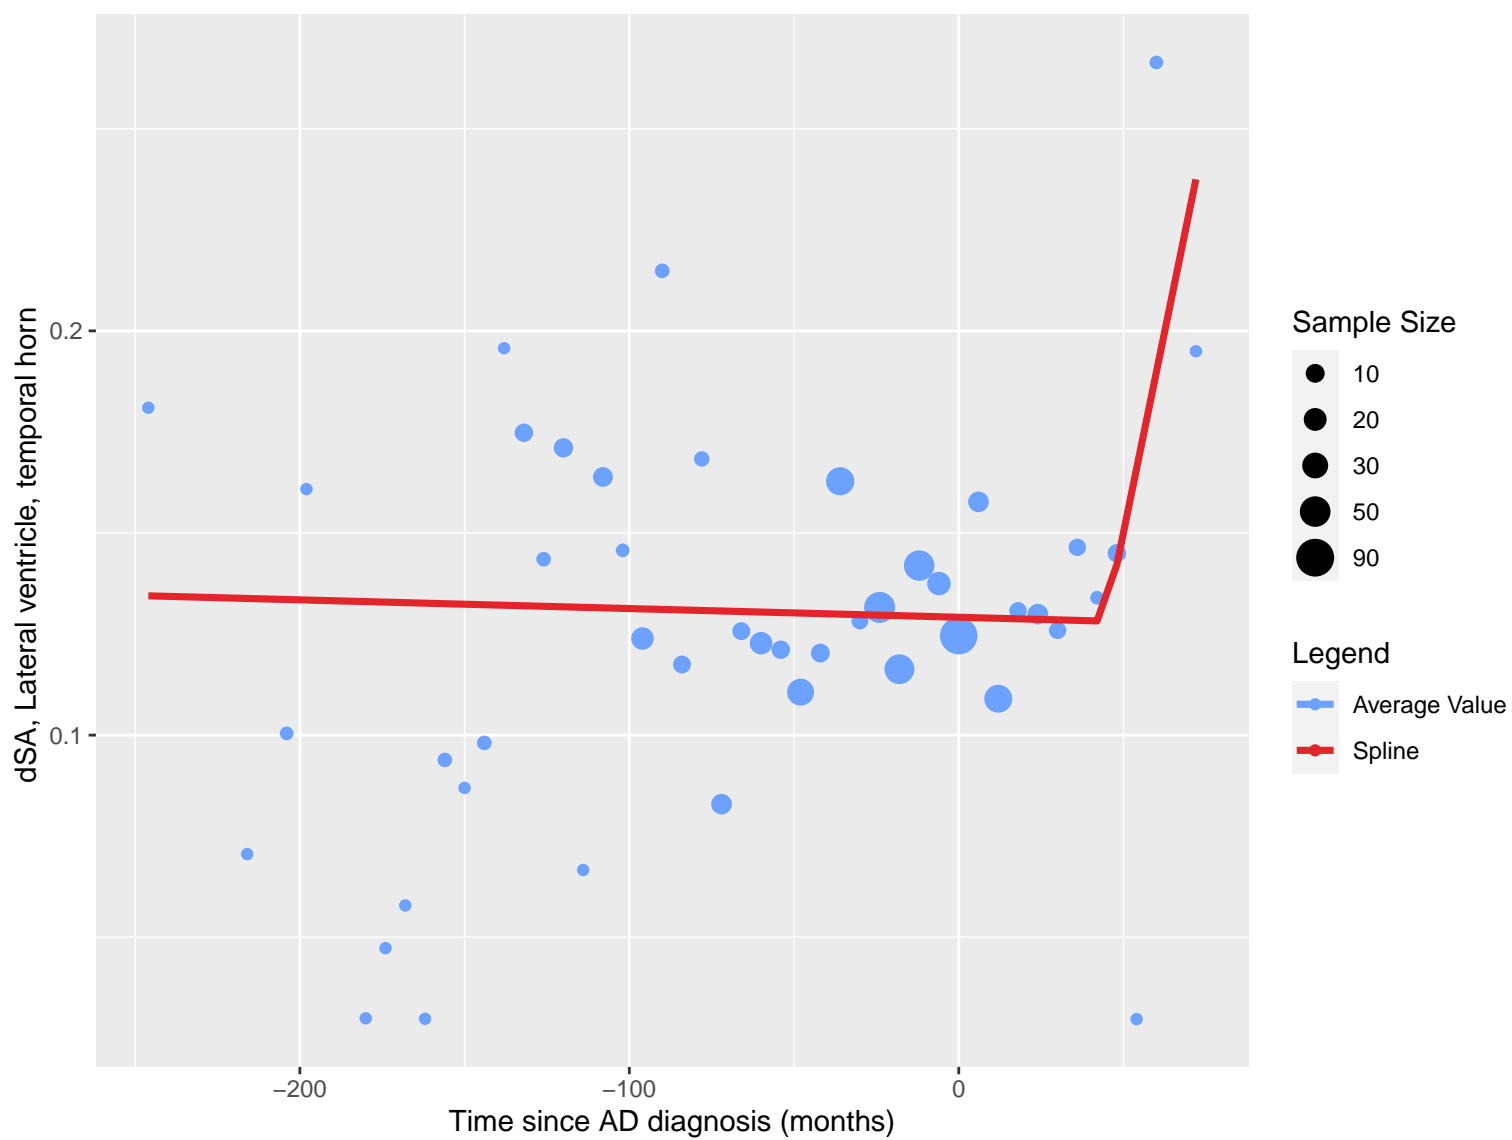

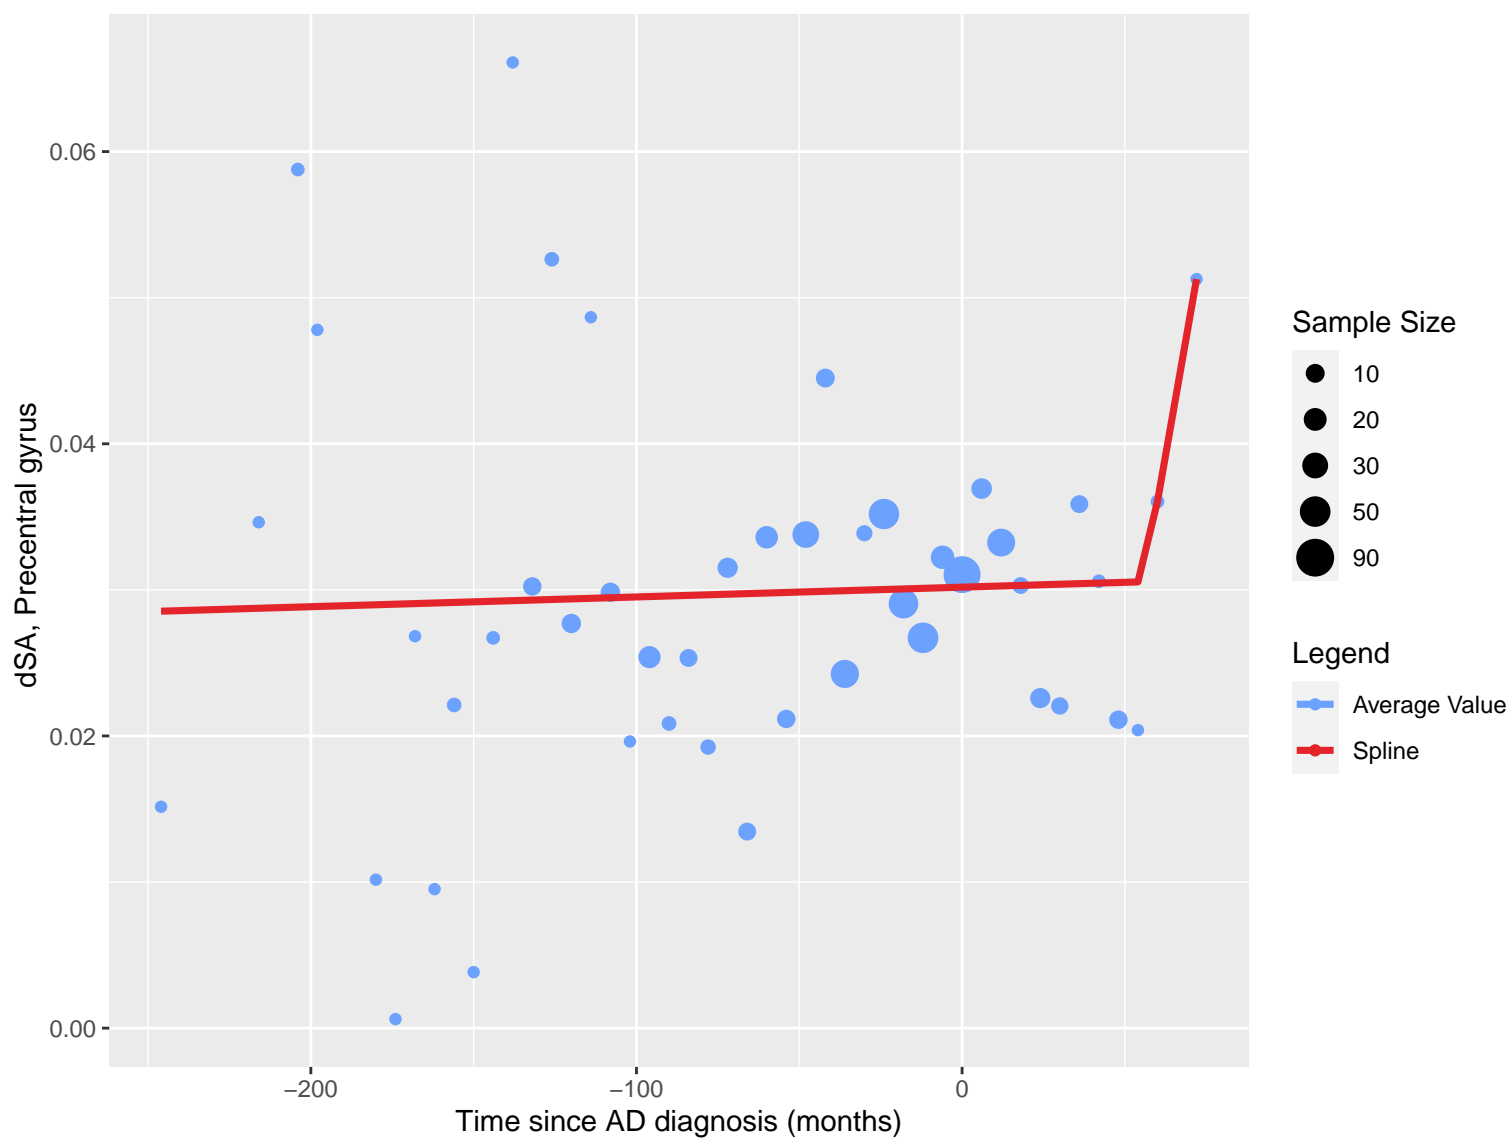

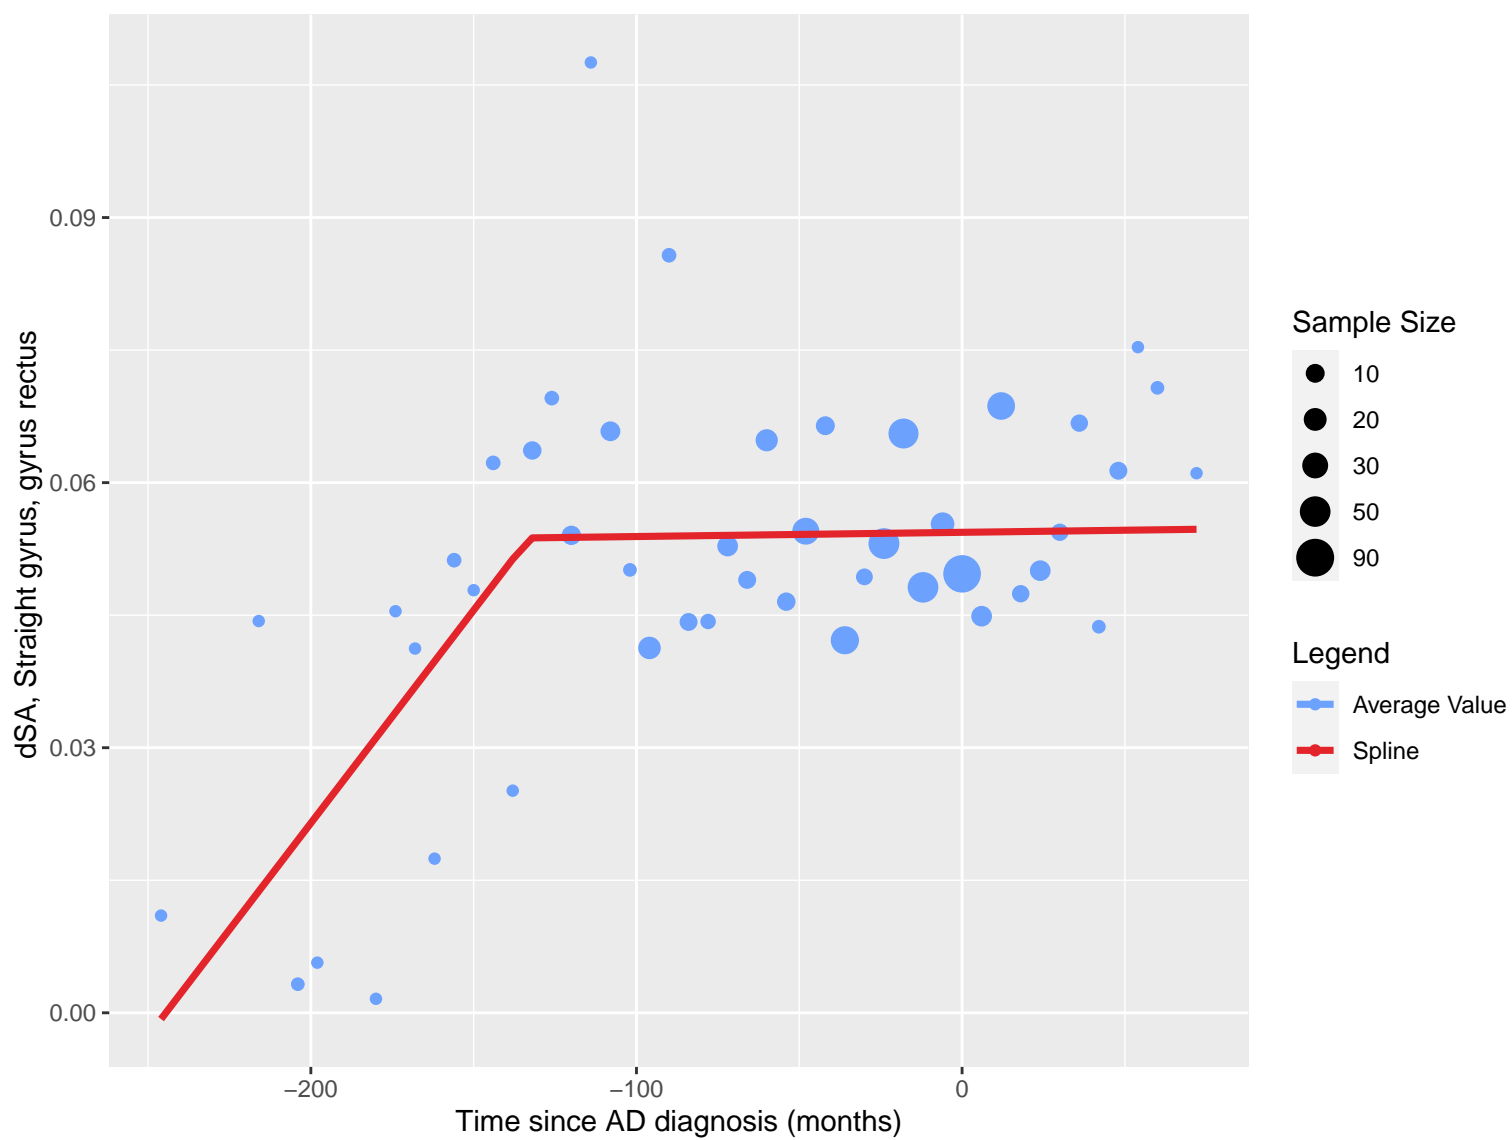

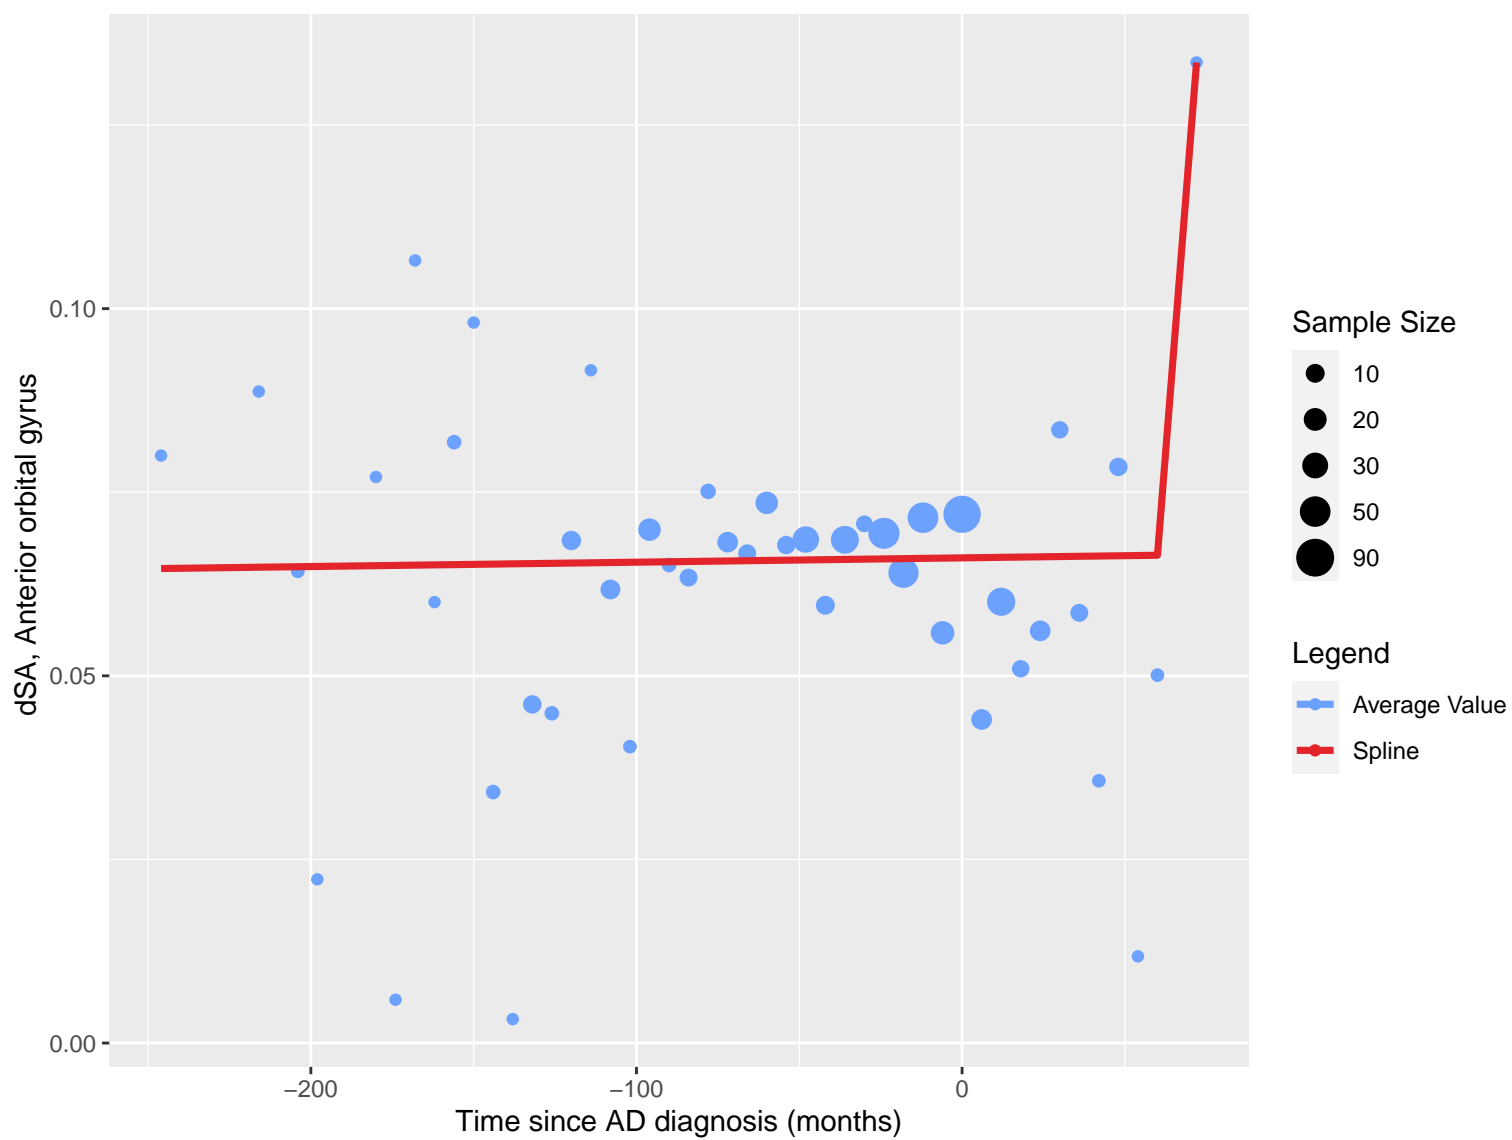



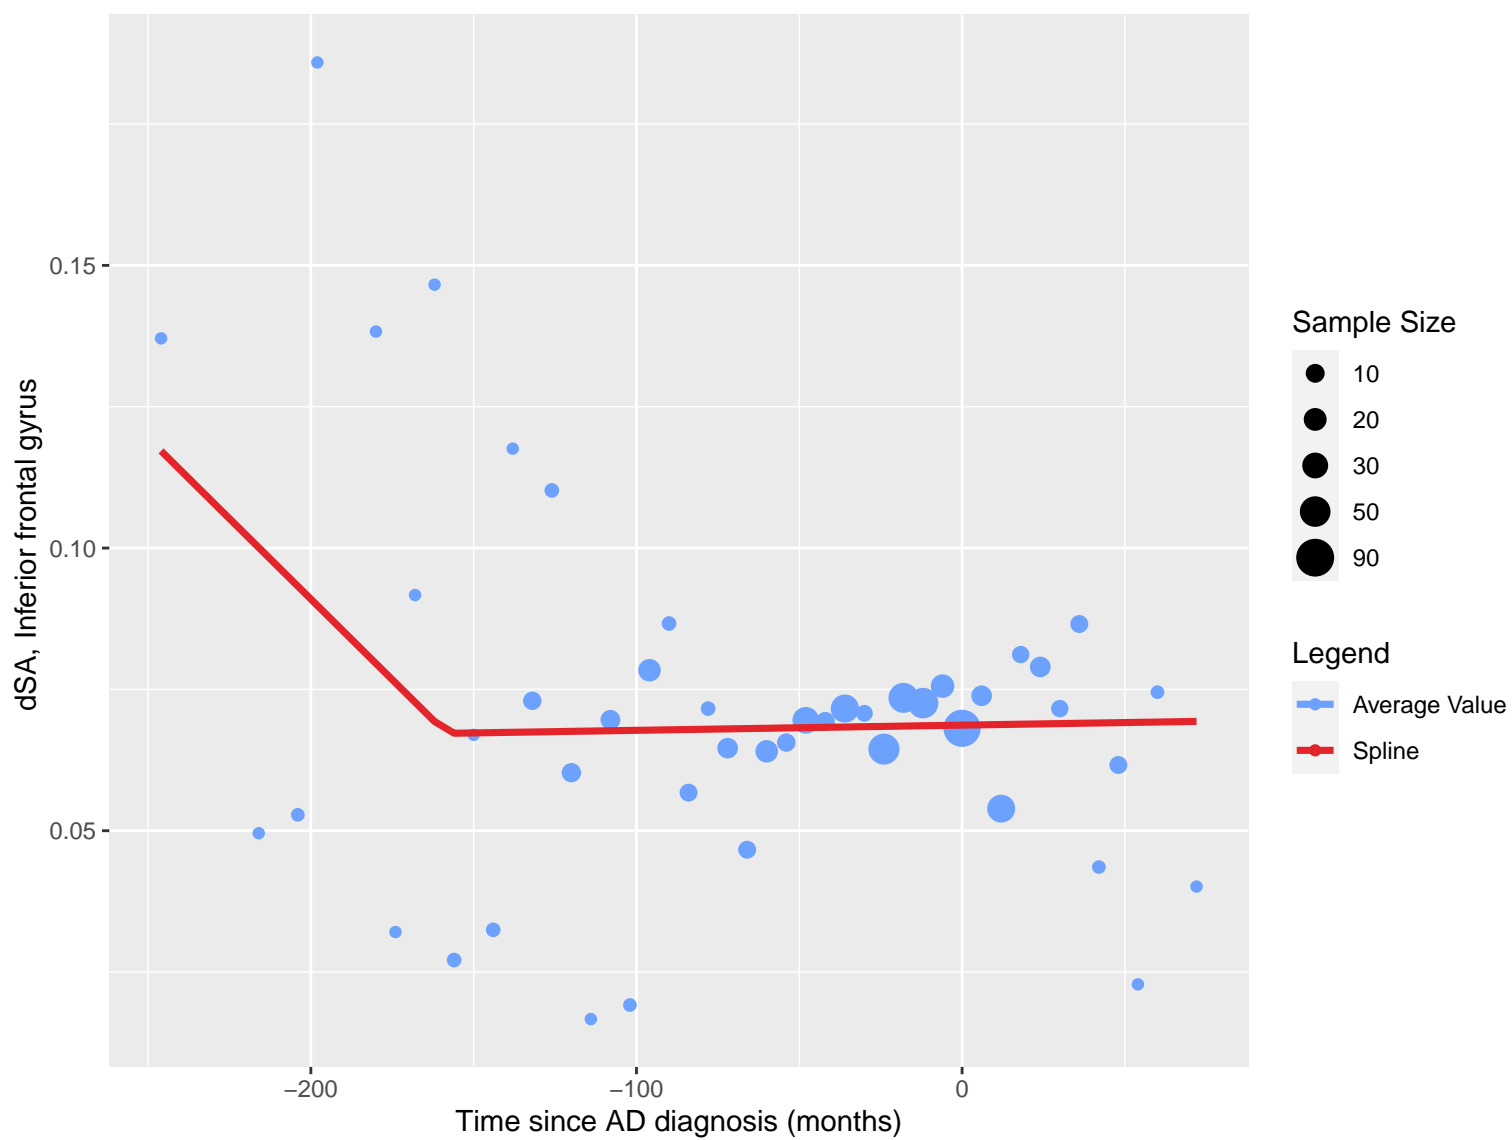

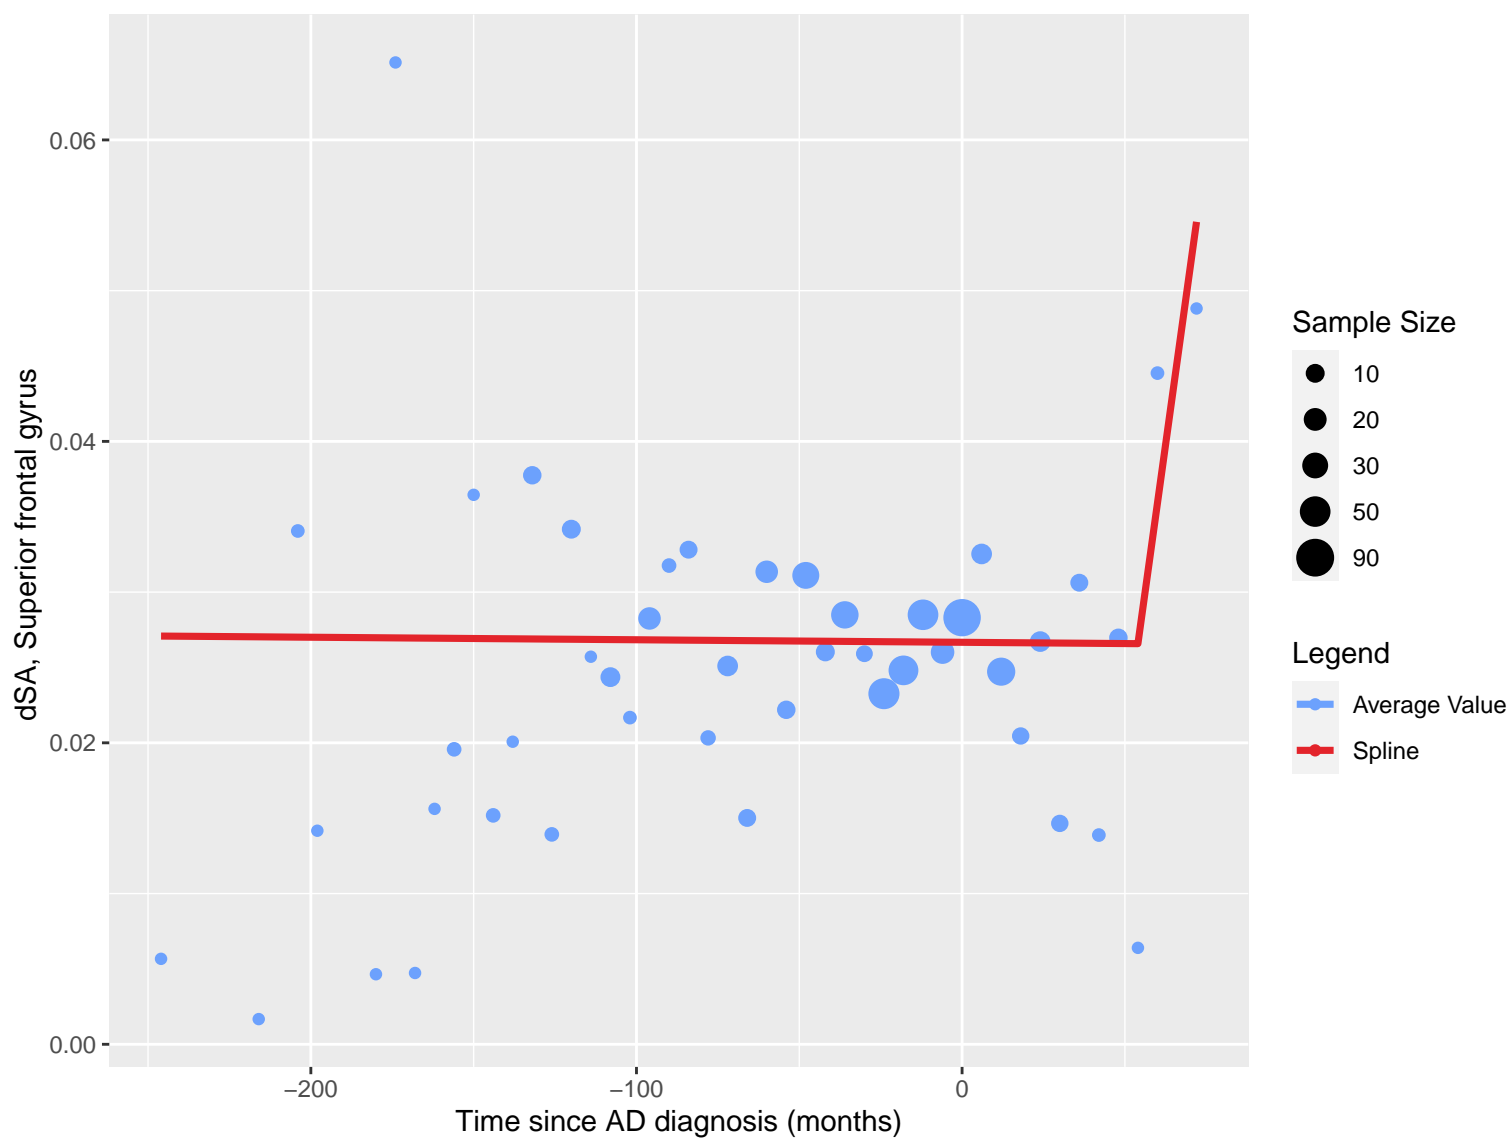

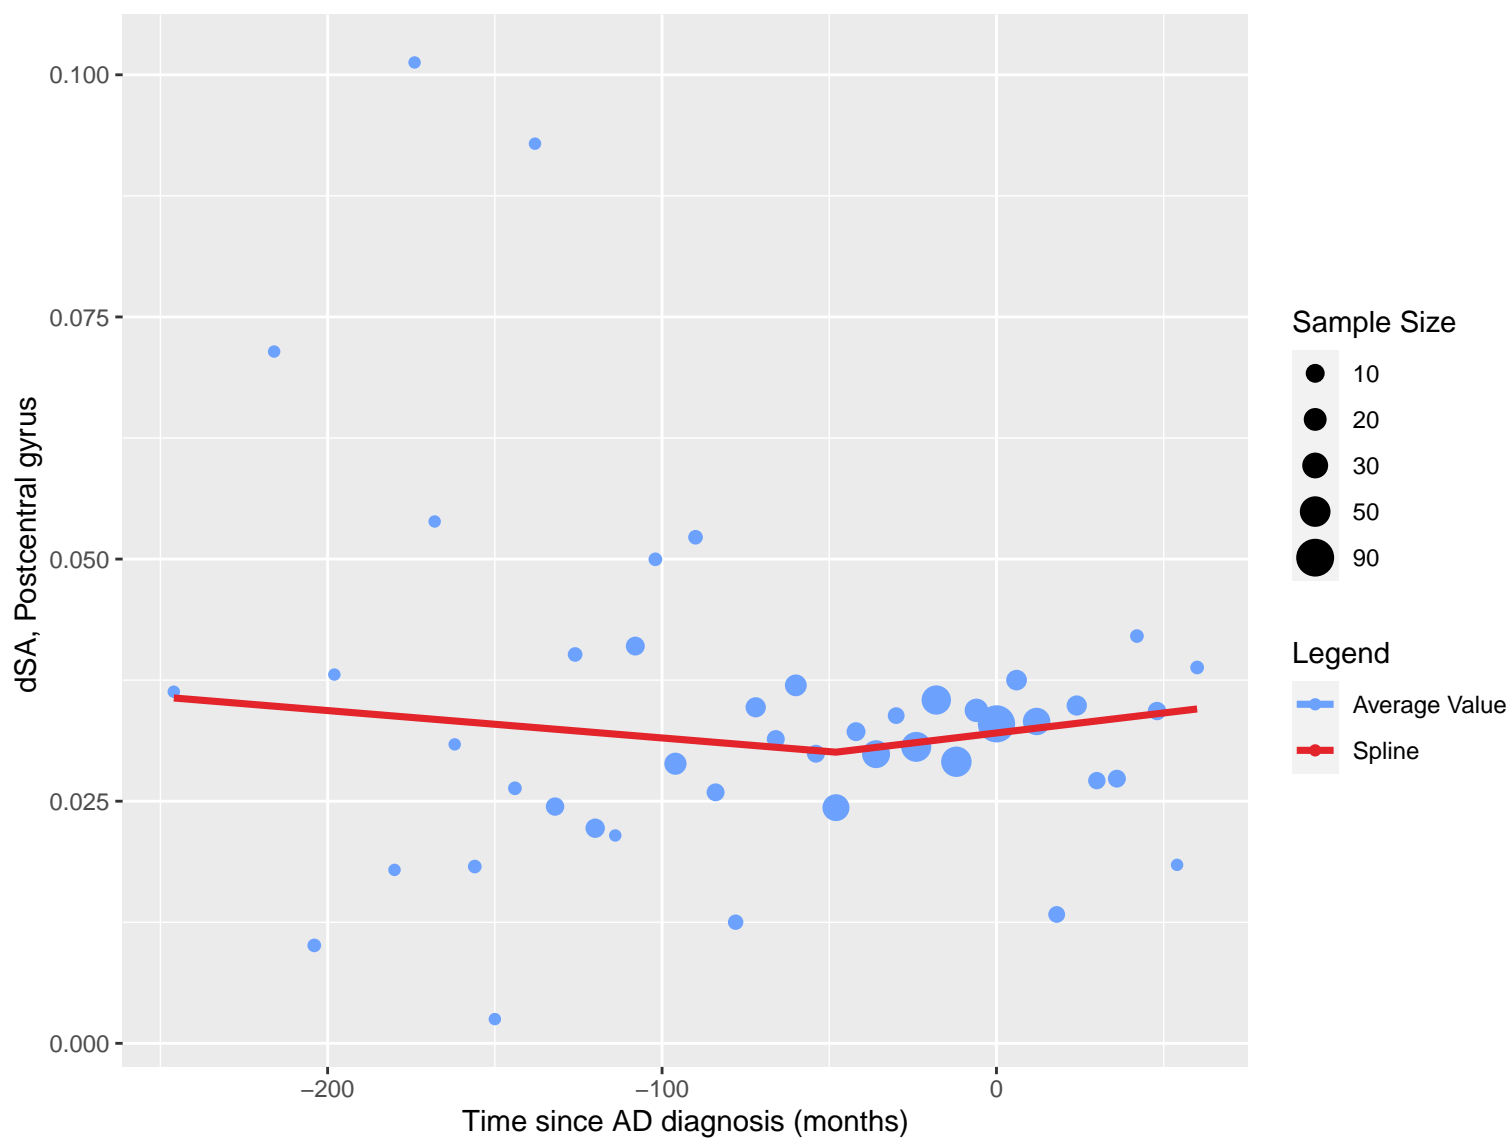

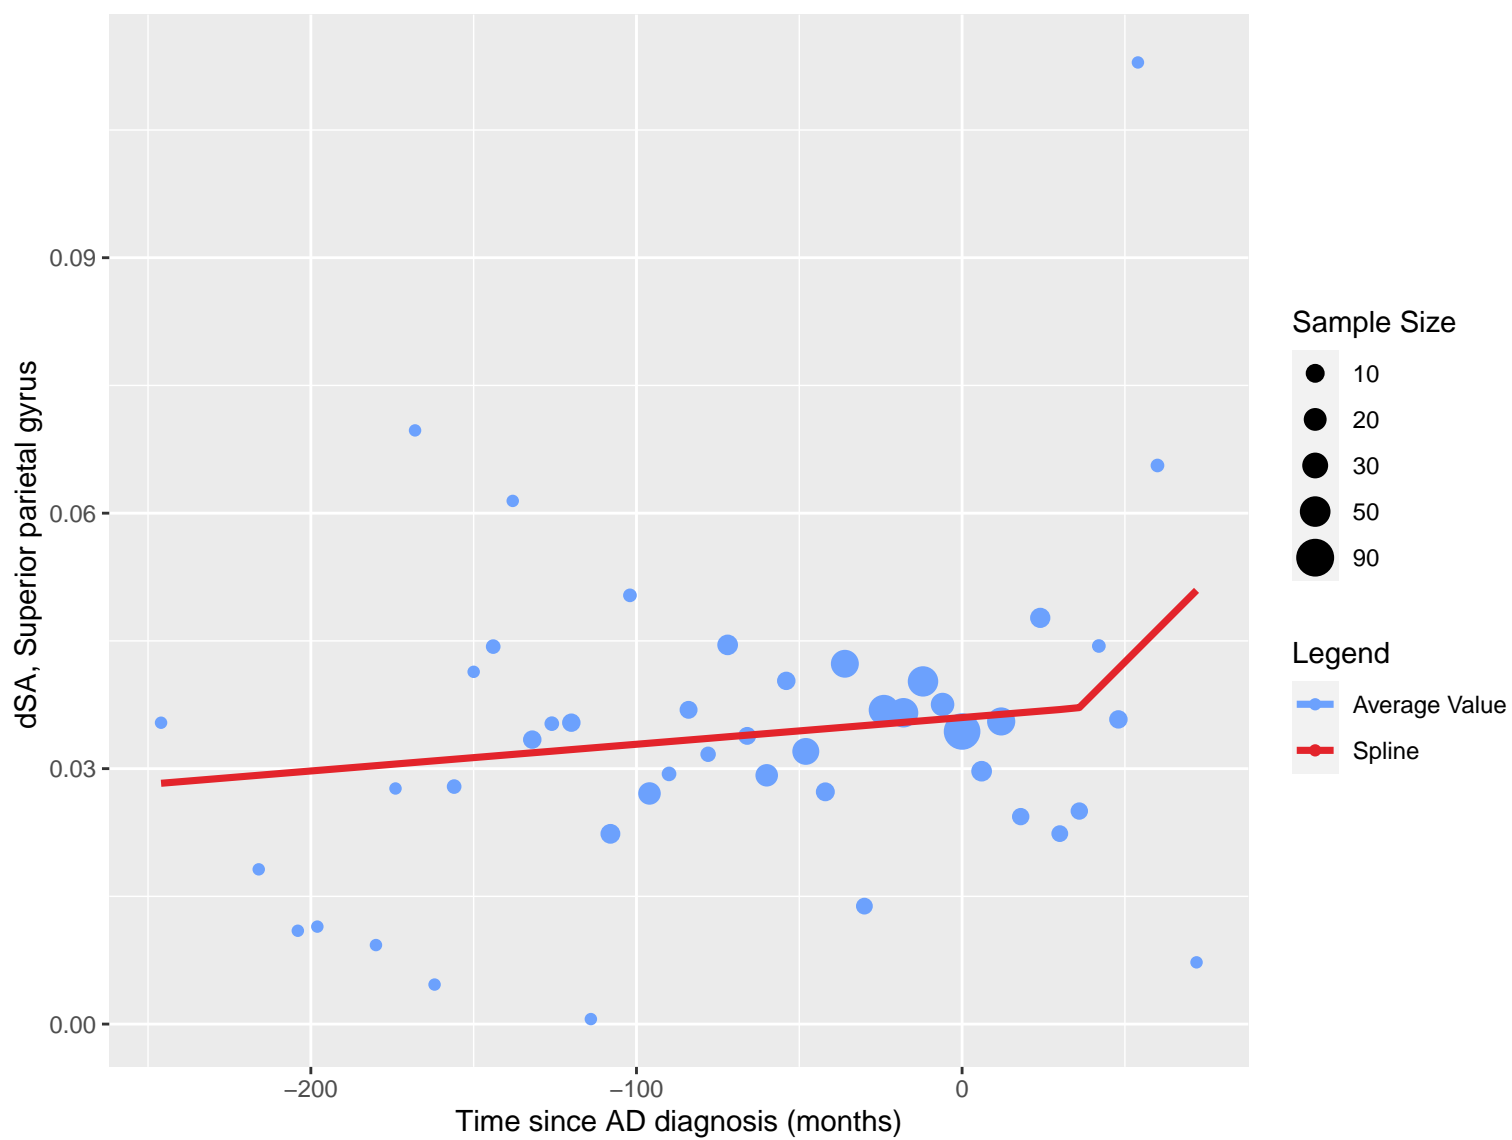

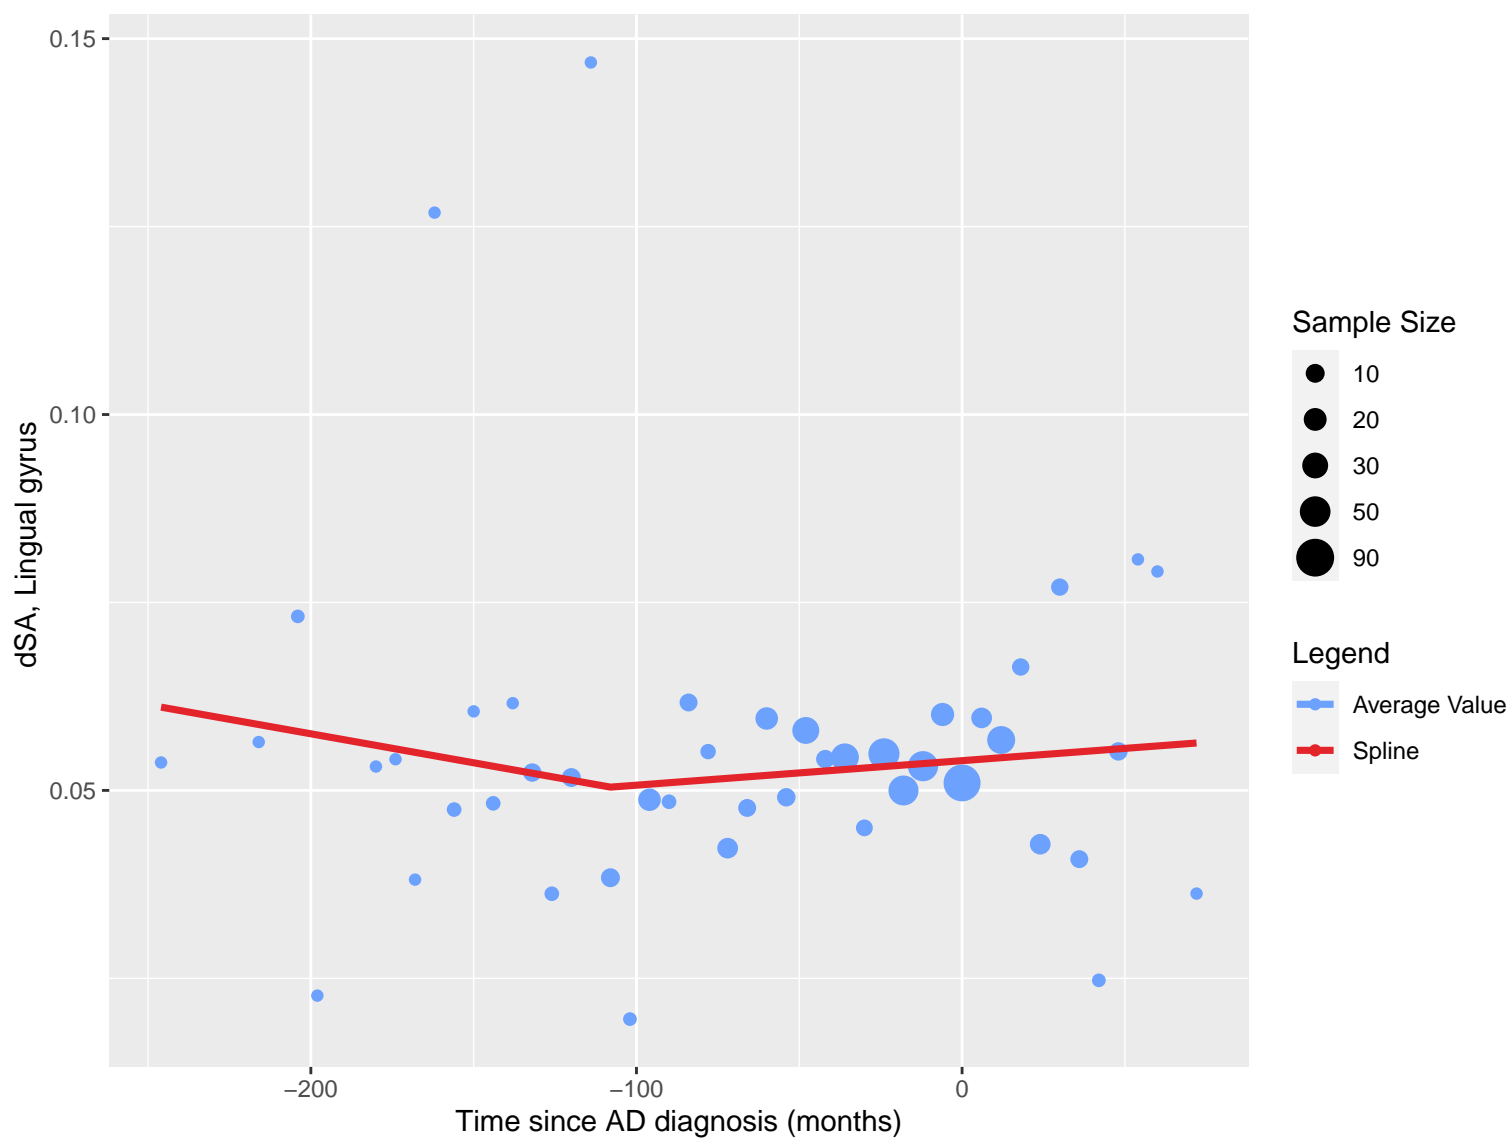

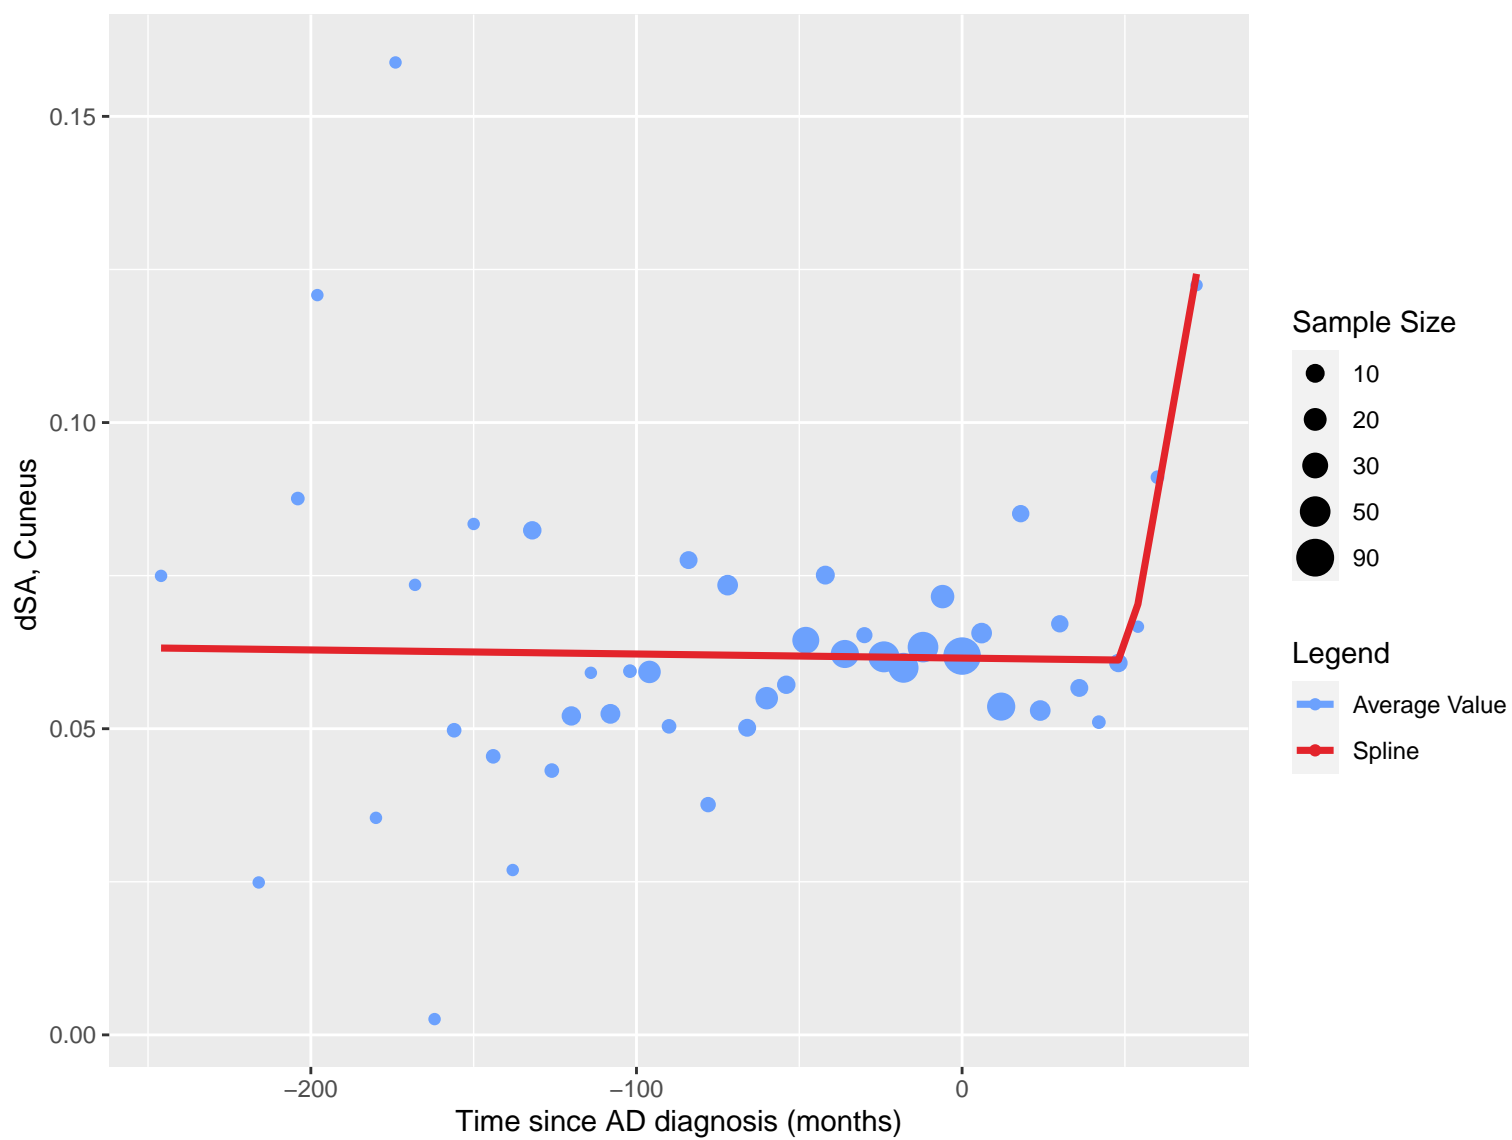

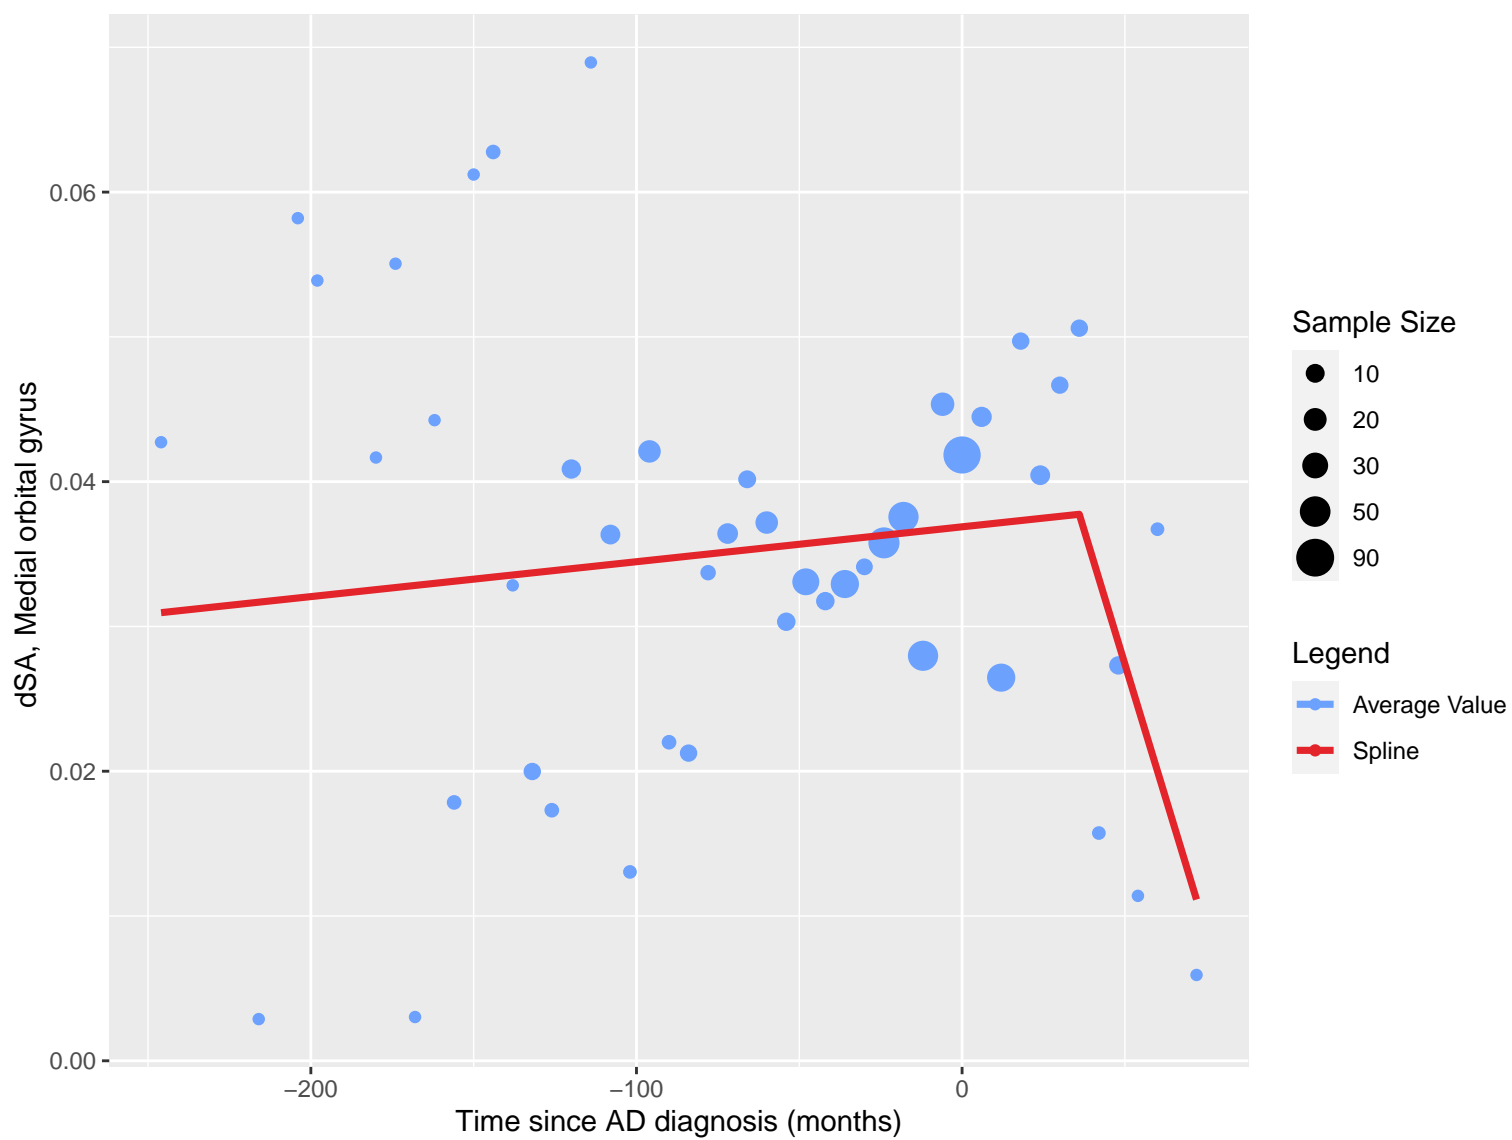

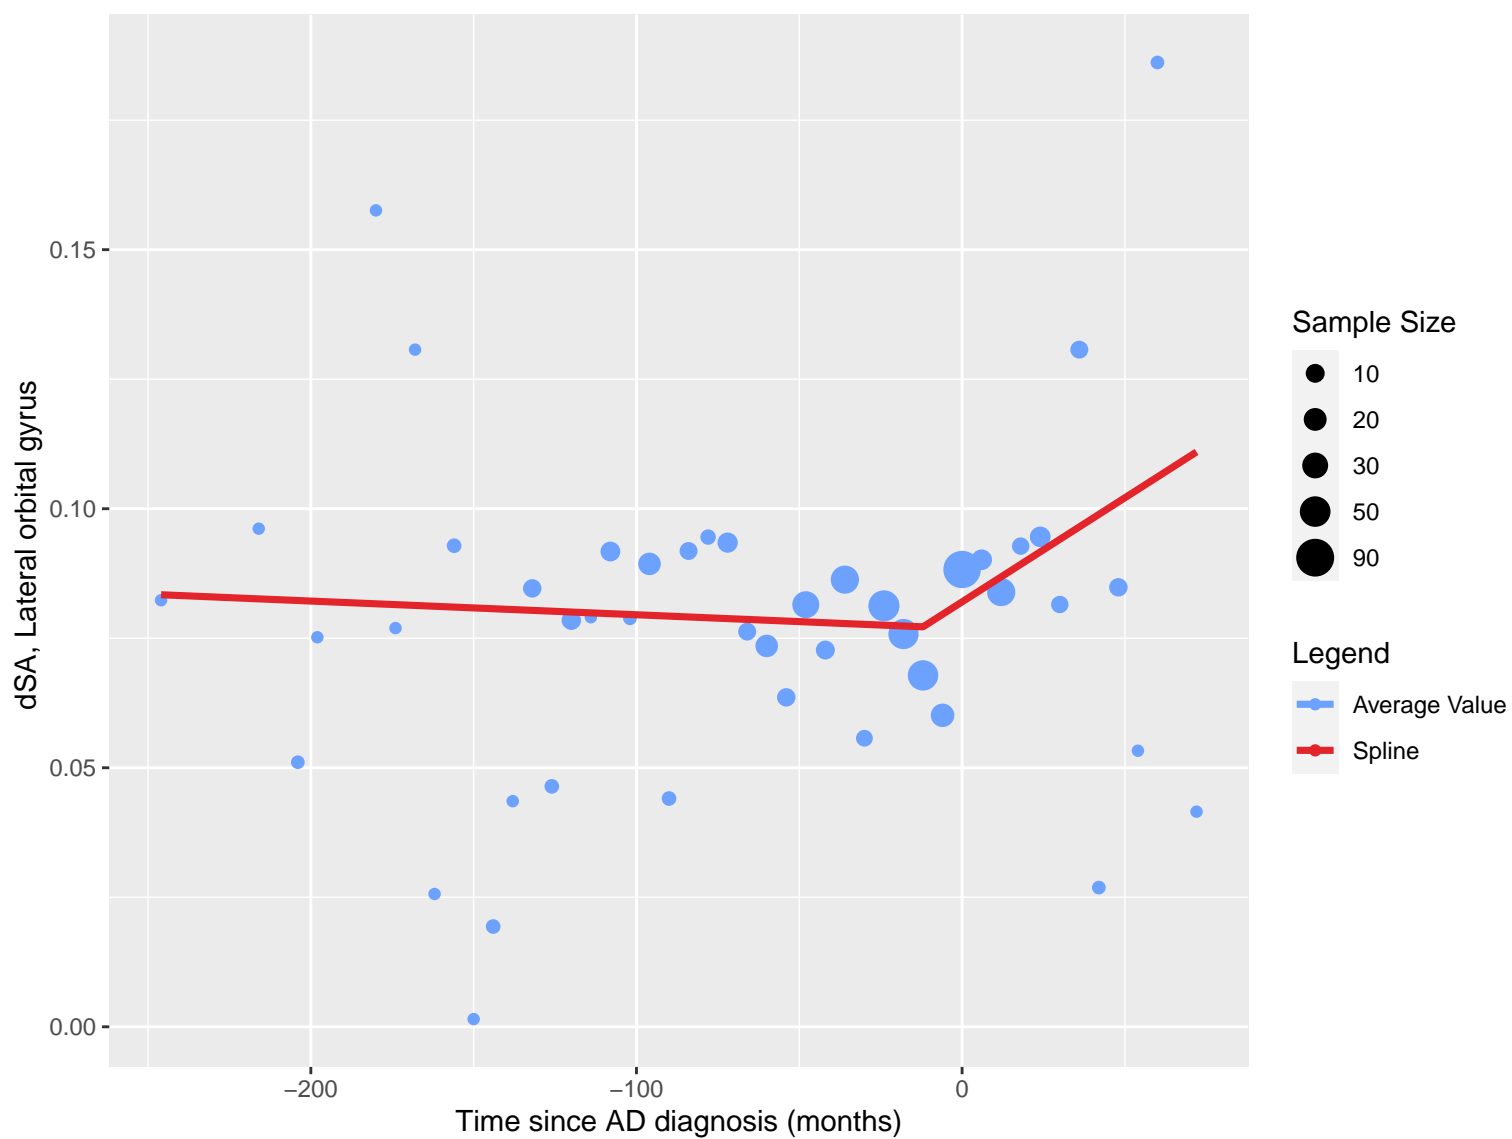



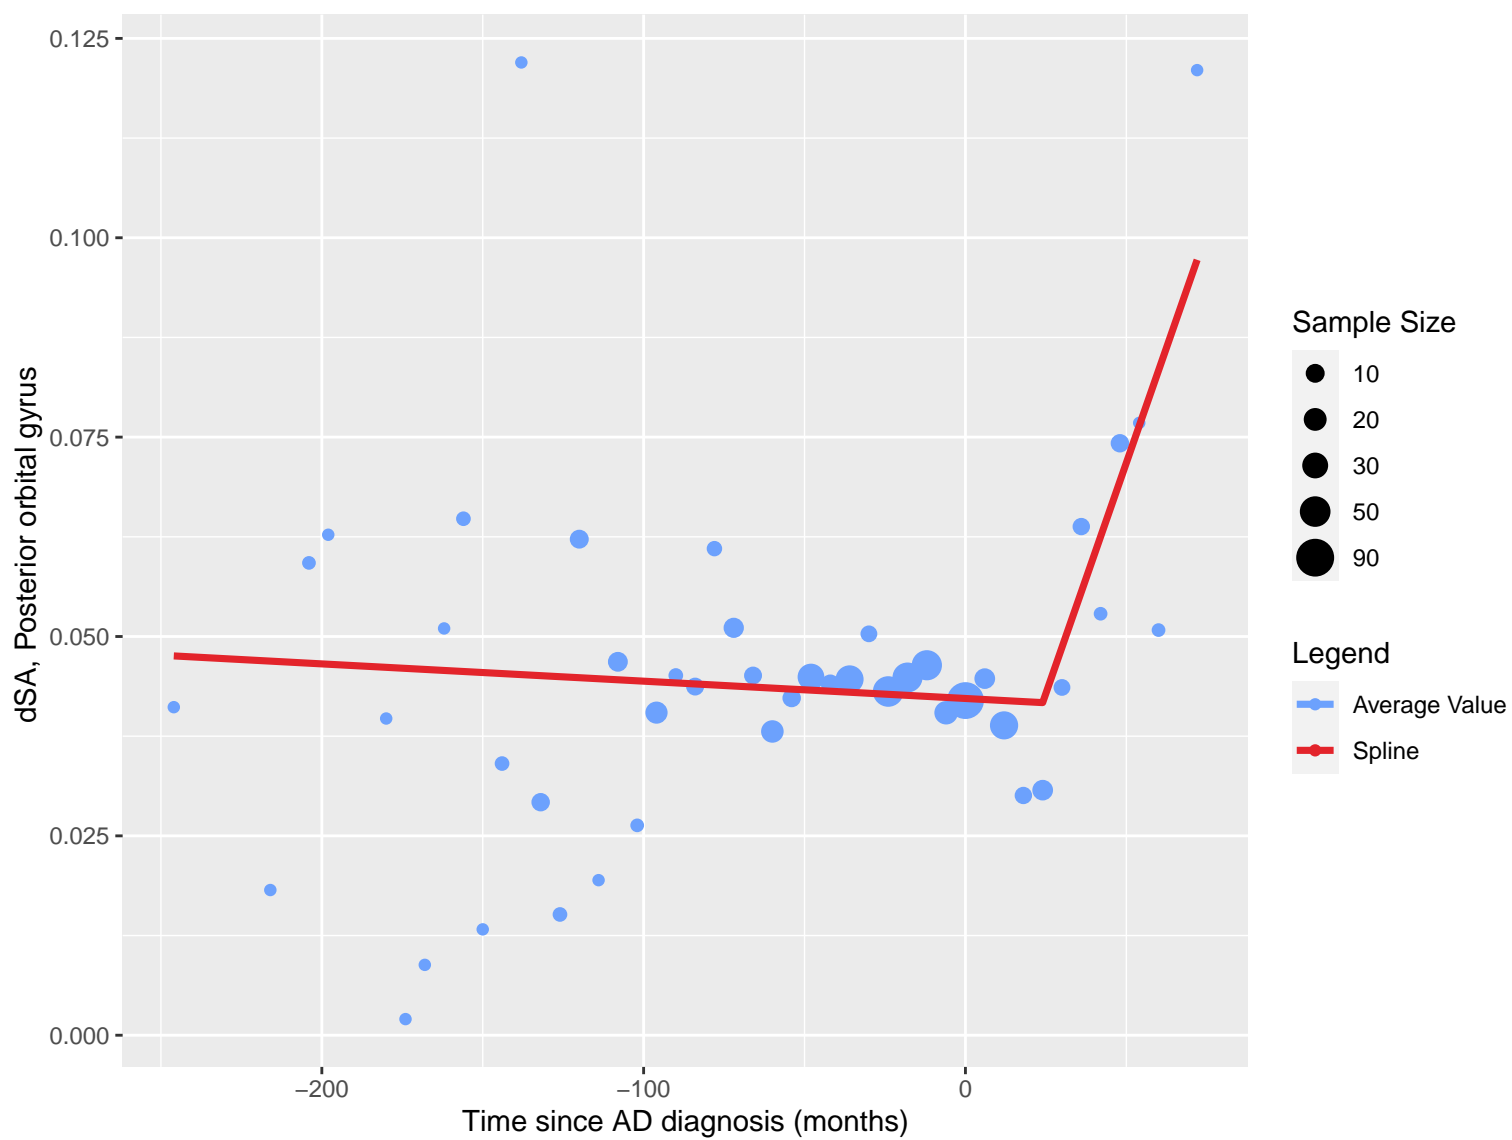

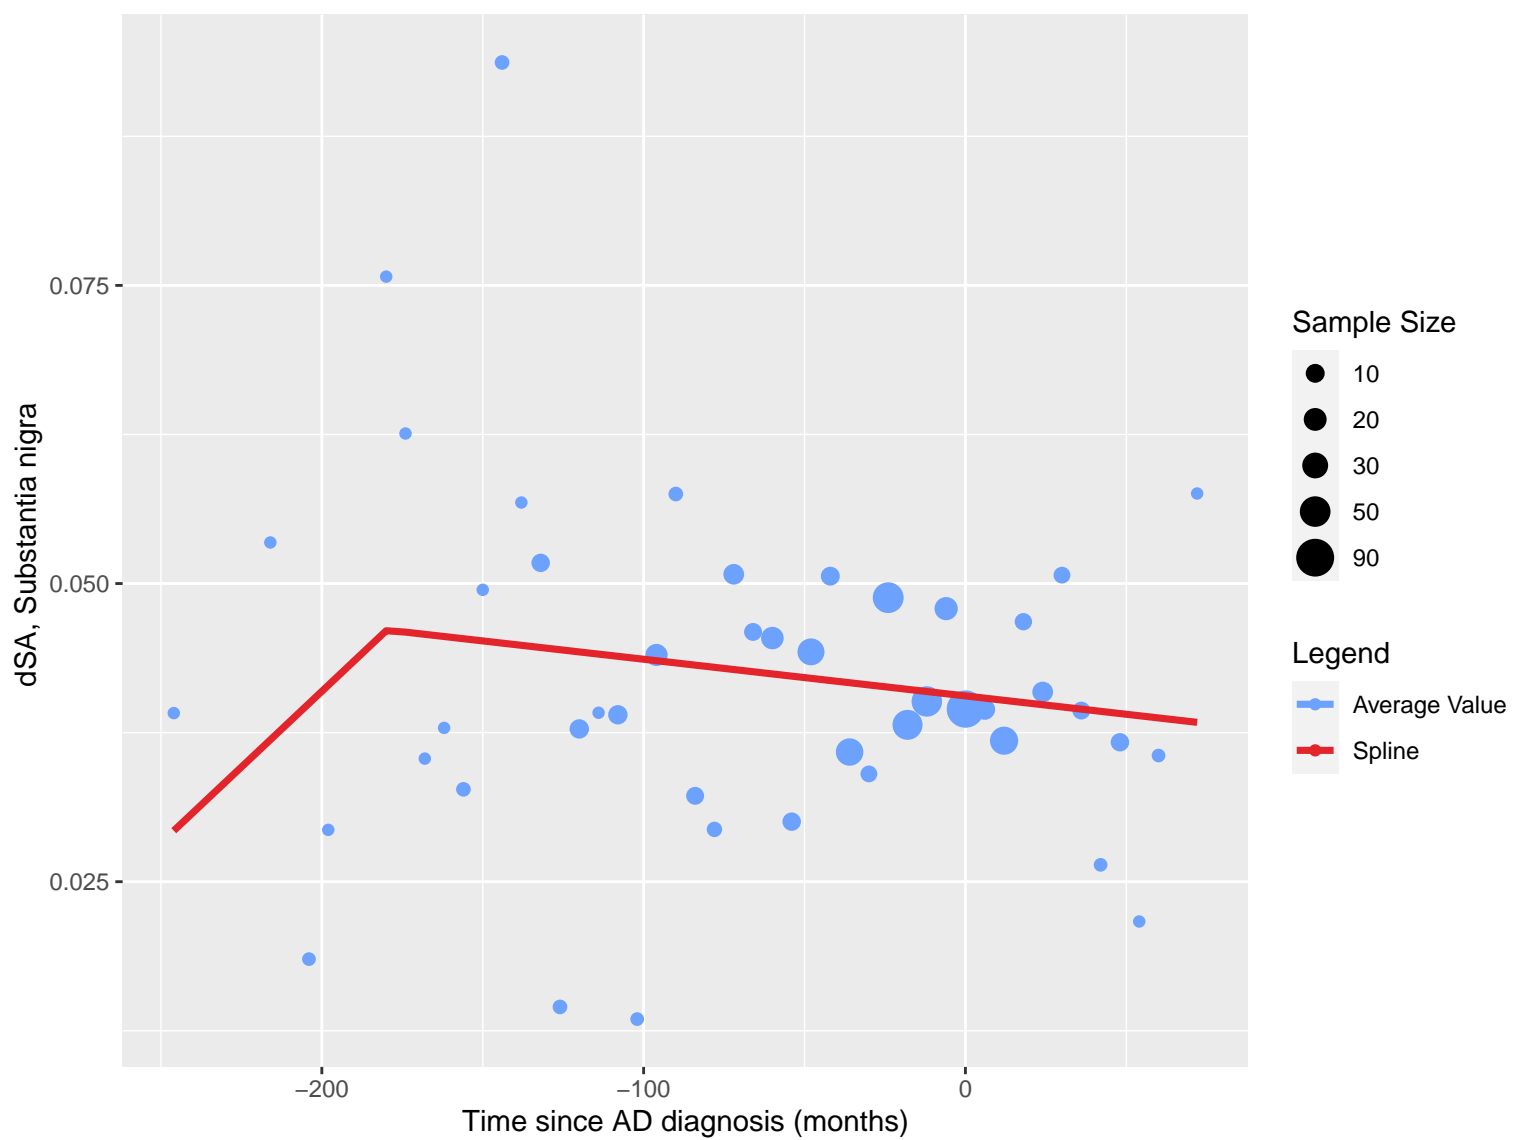

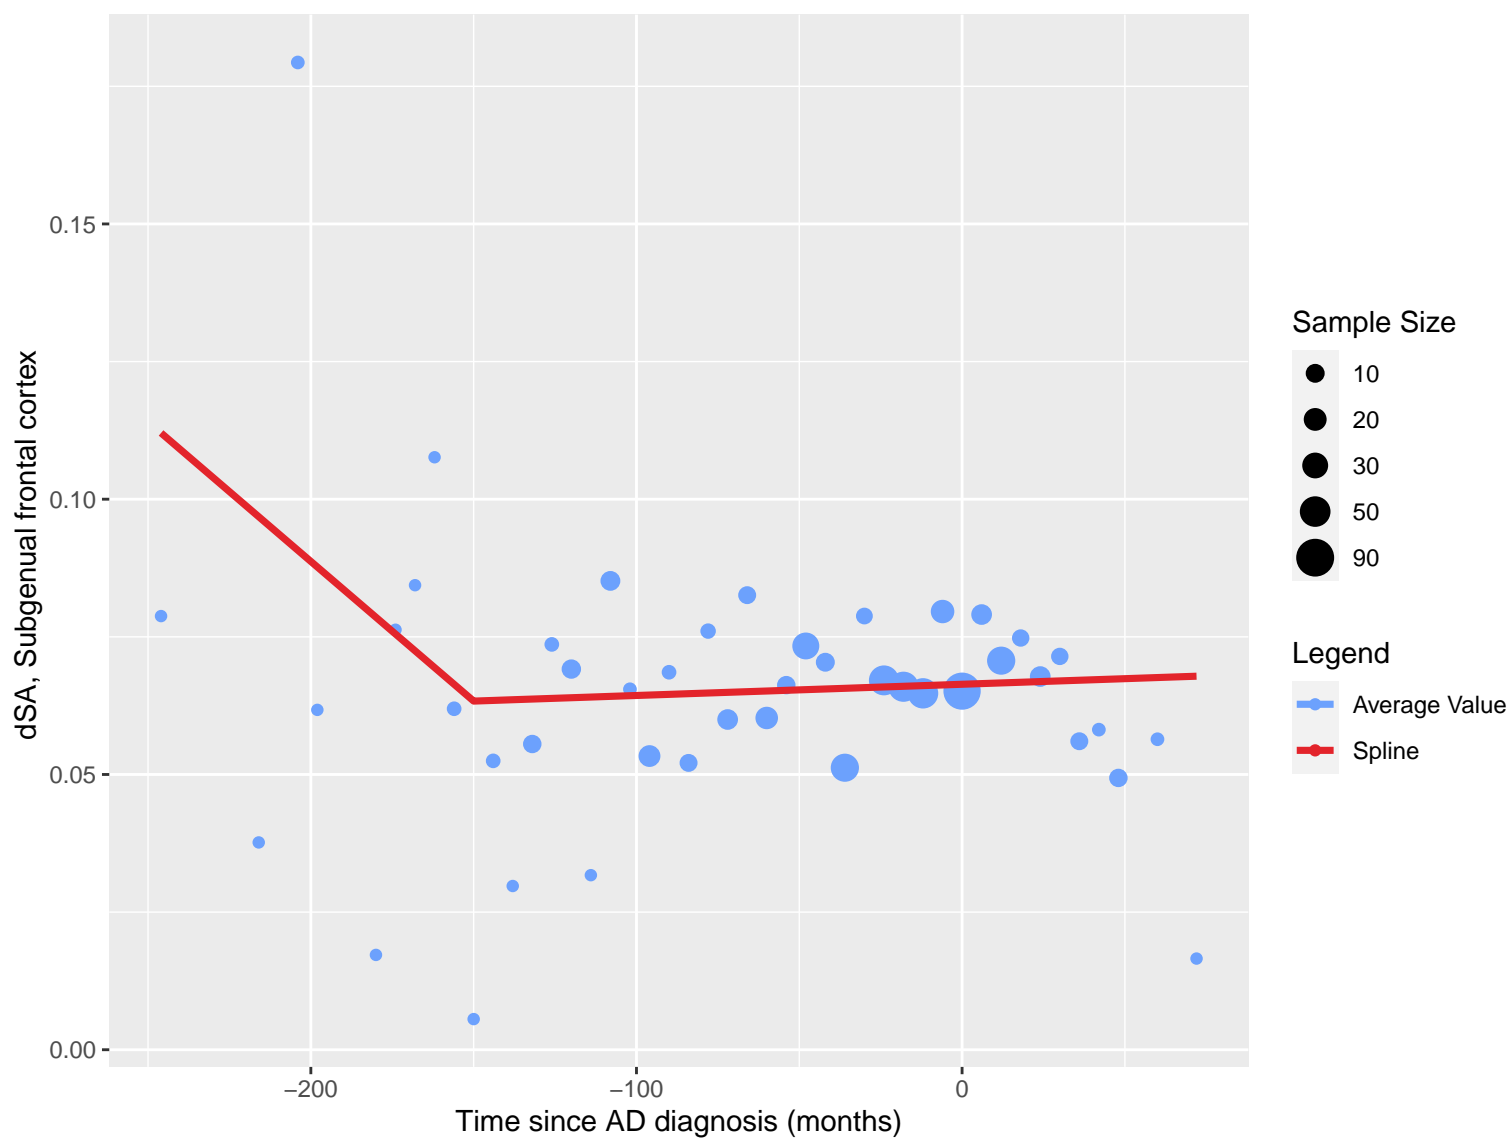

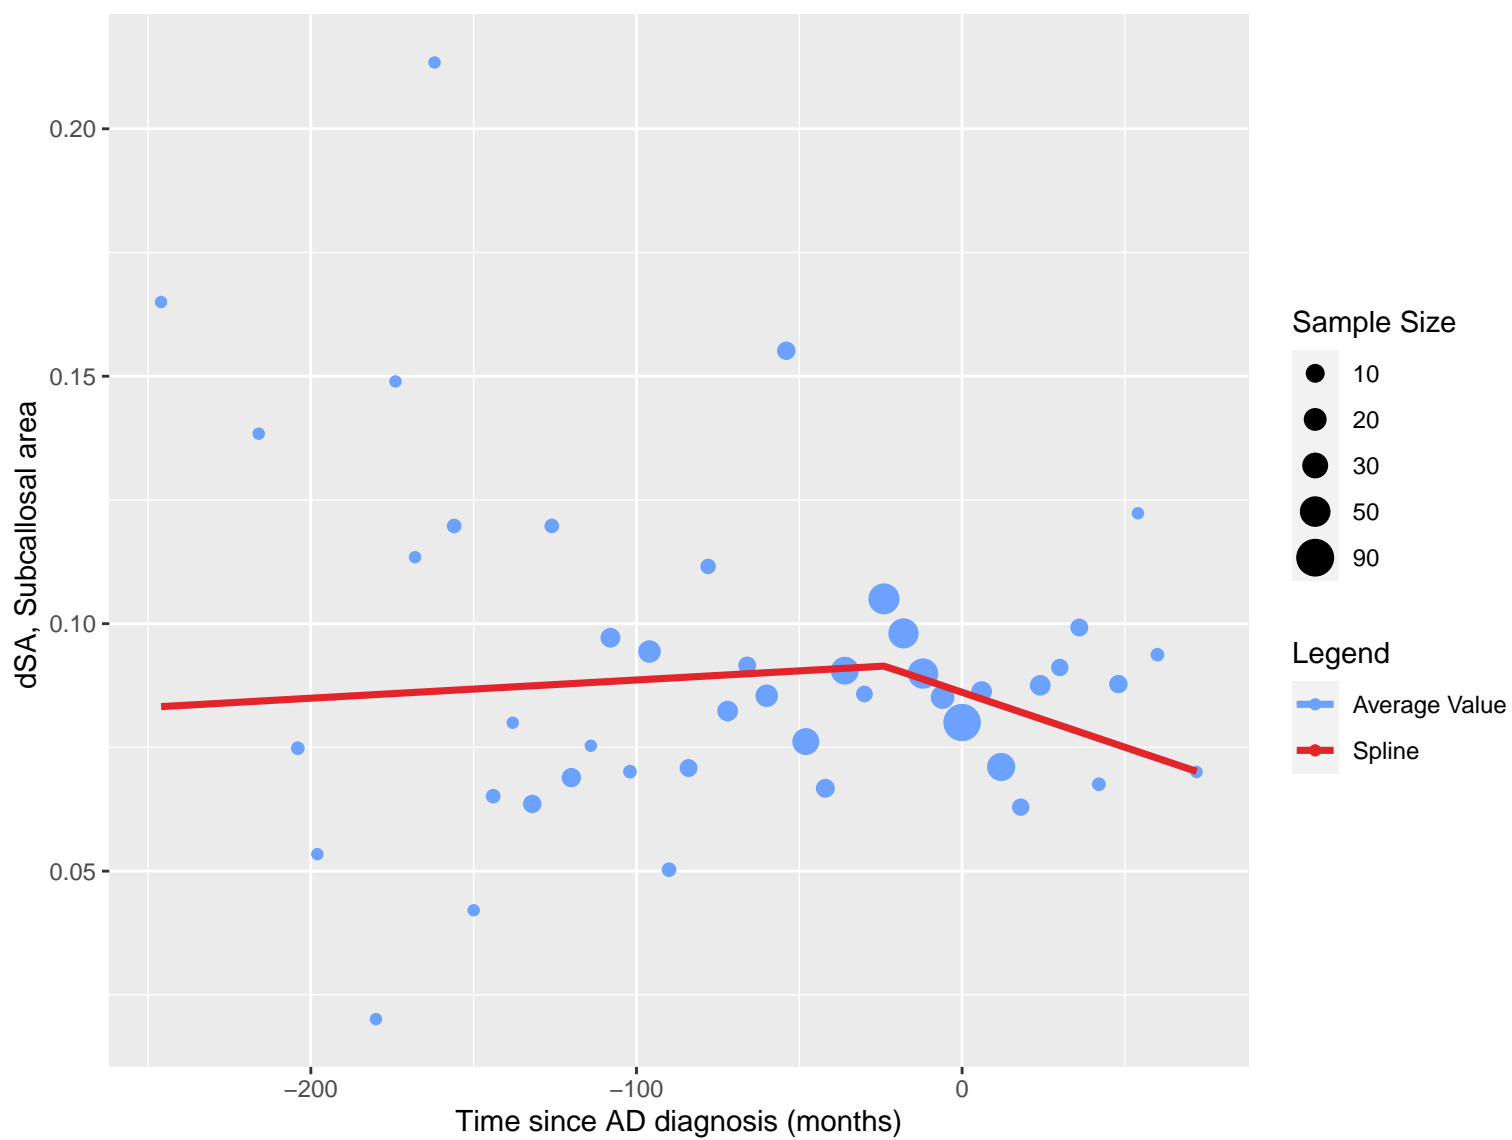

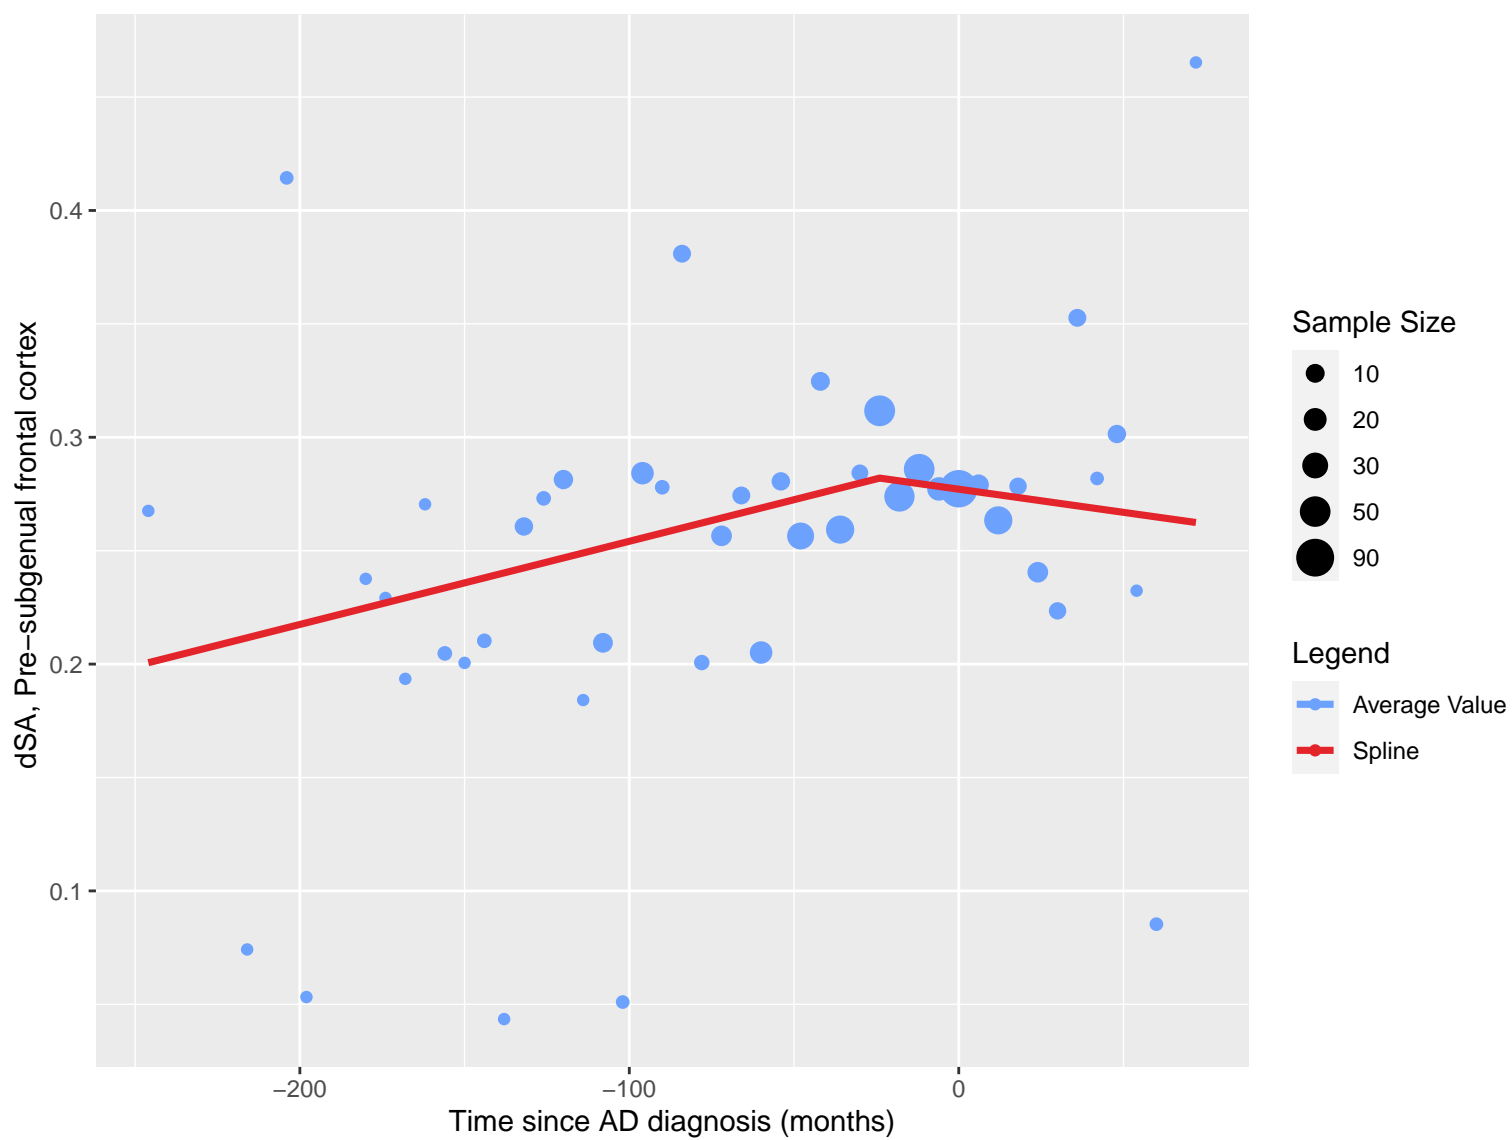

dSA, Superior temporal gyrus, anterior part

0.20

0.15

0.10

0.05

-200

-100

0

Time since AD diagnosis (months)

Sample Size

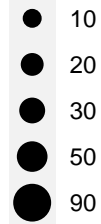

Legend

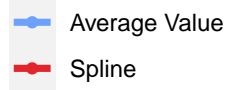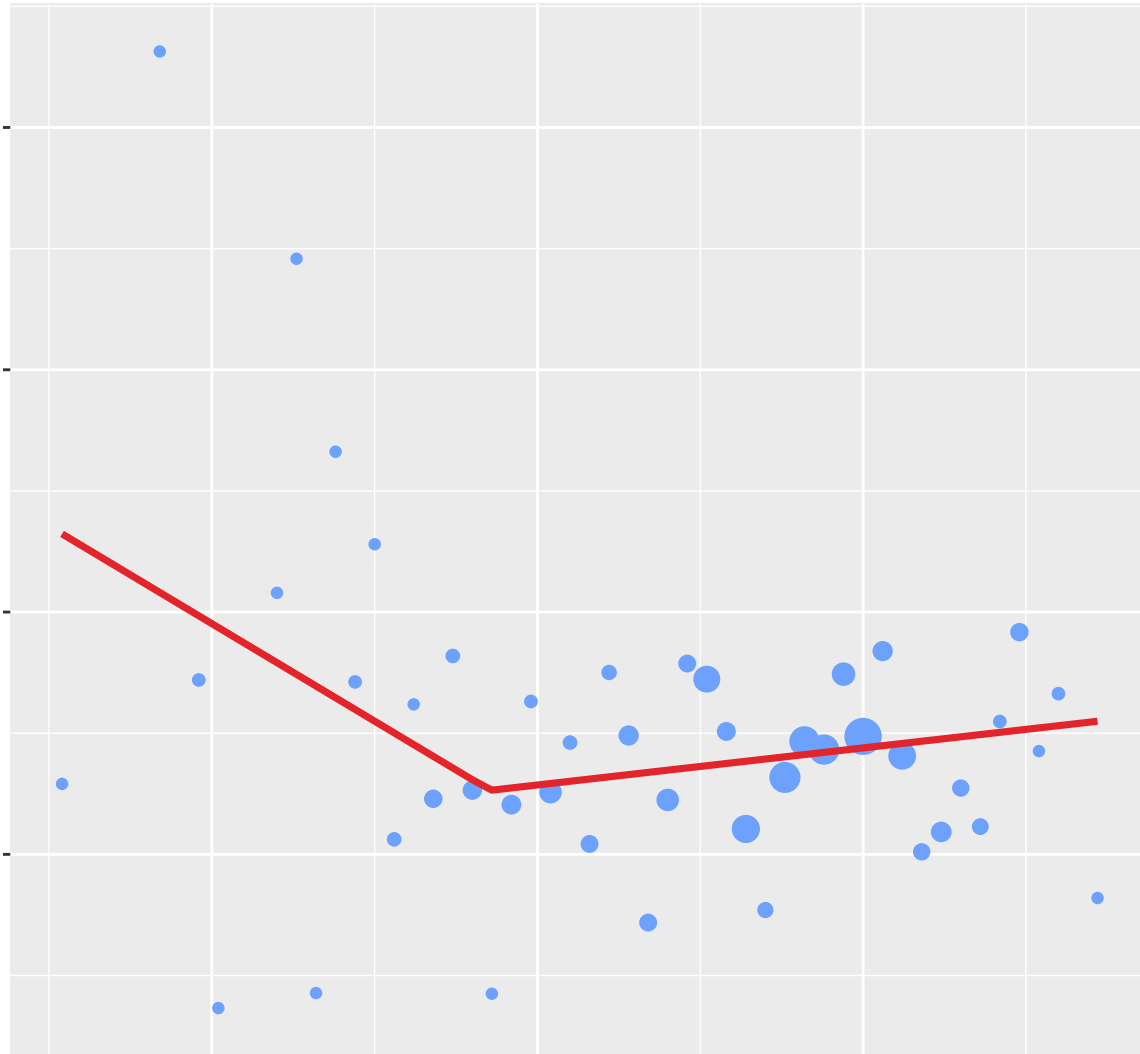

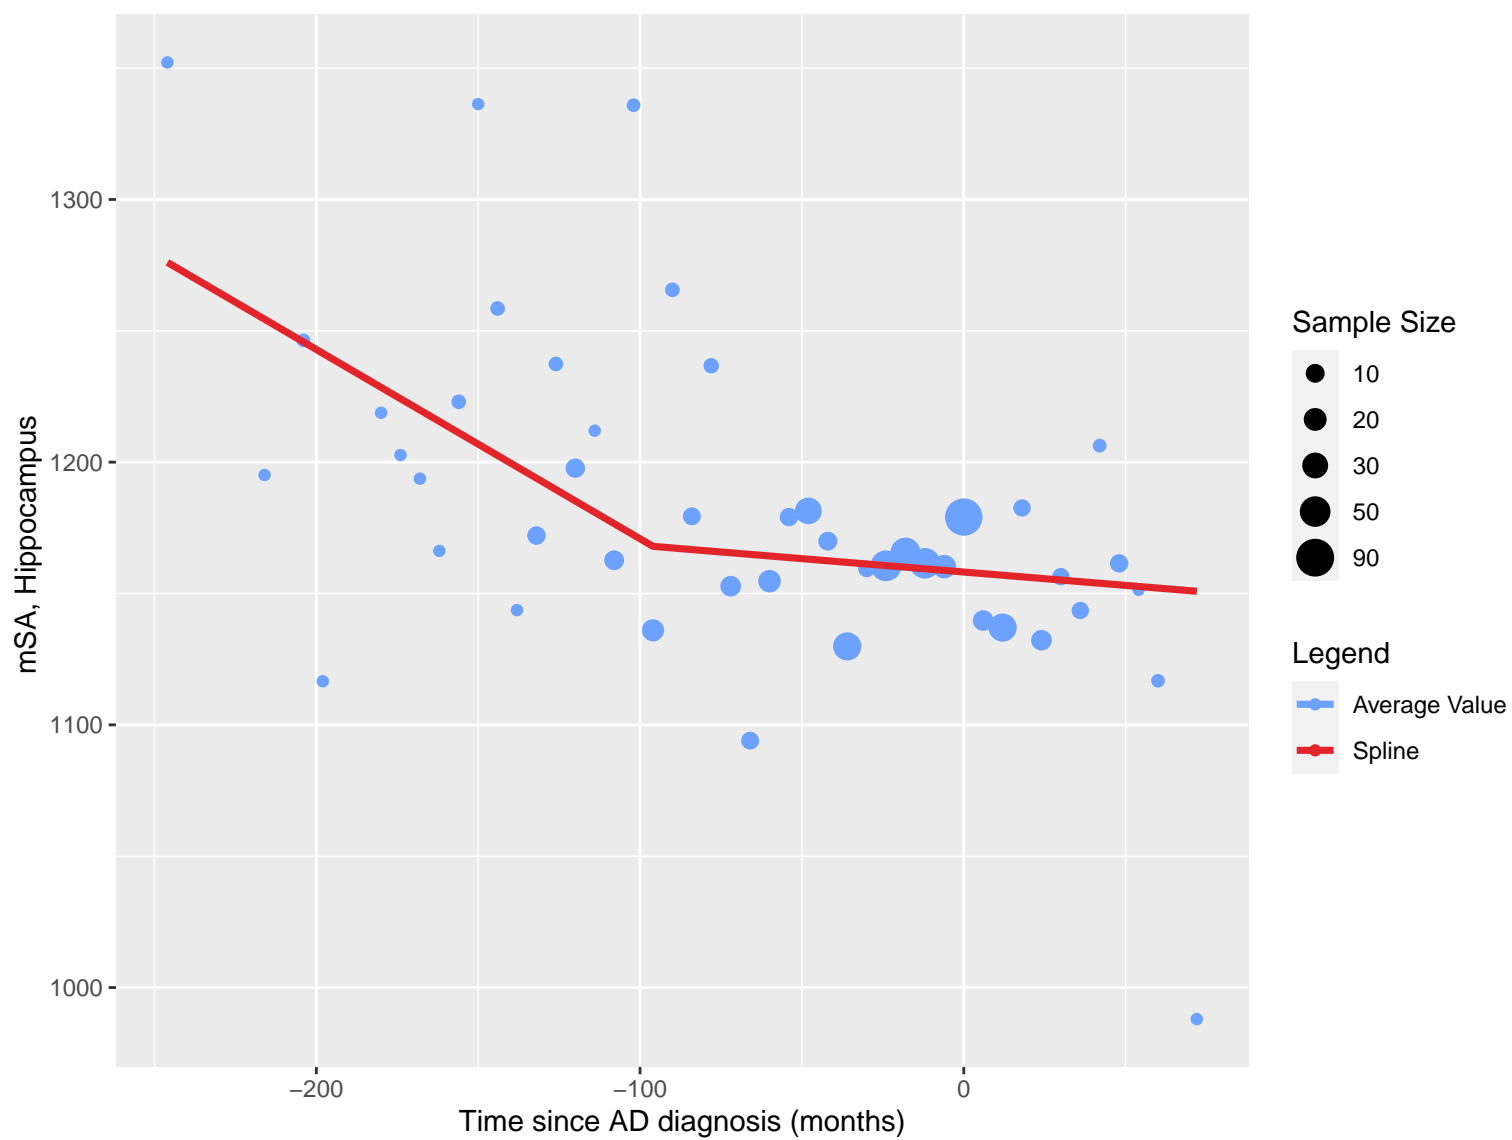

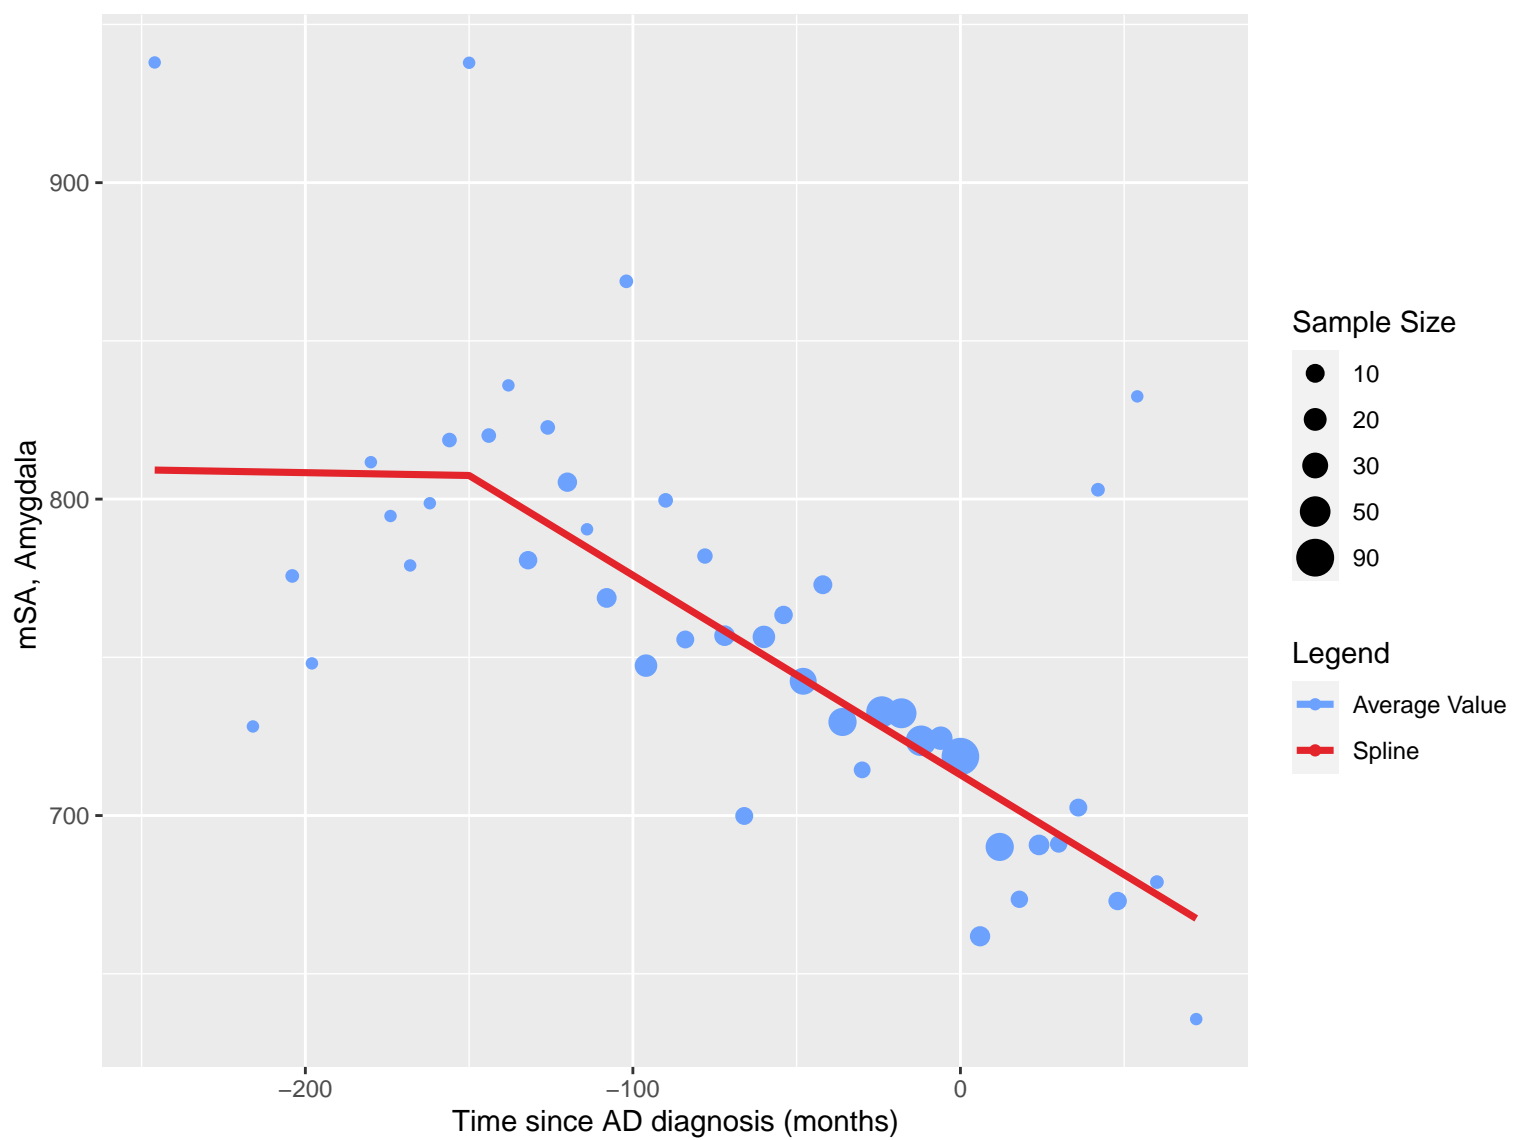



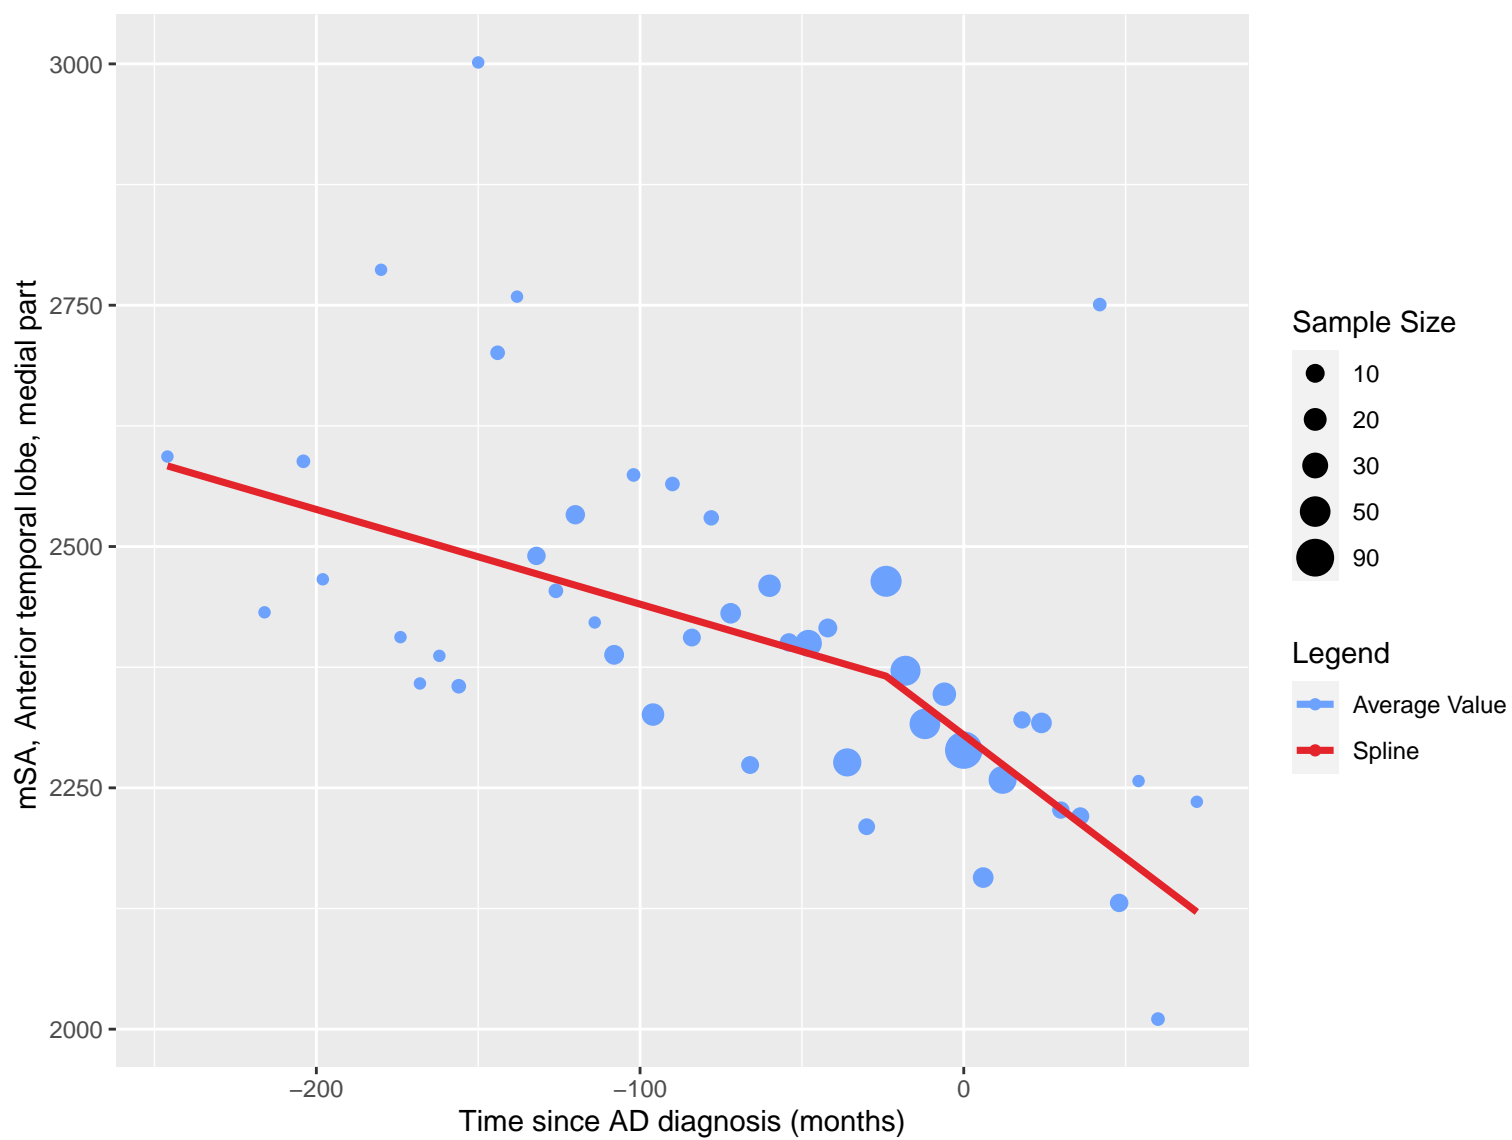

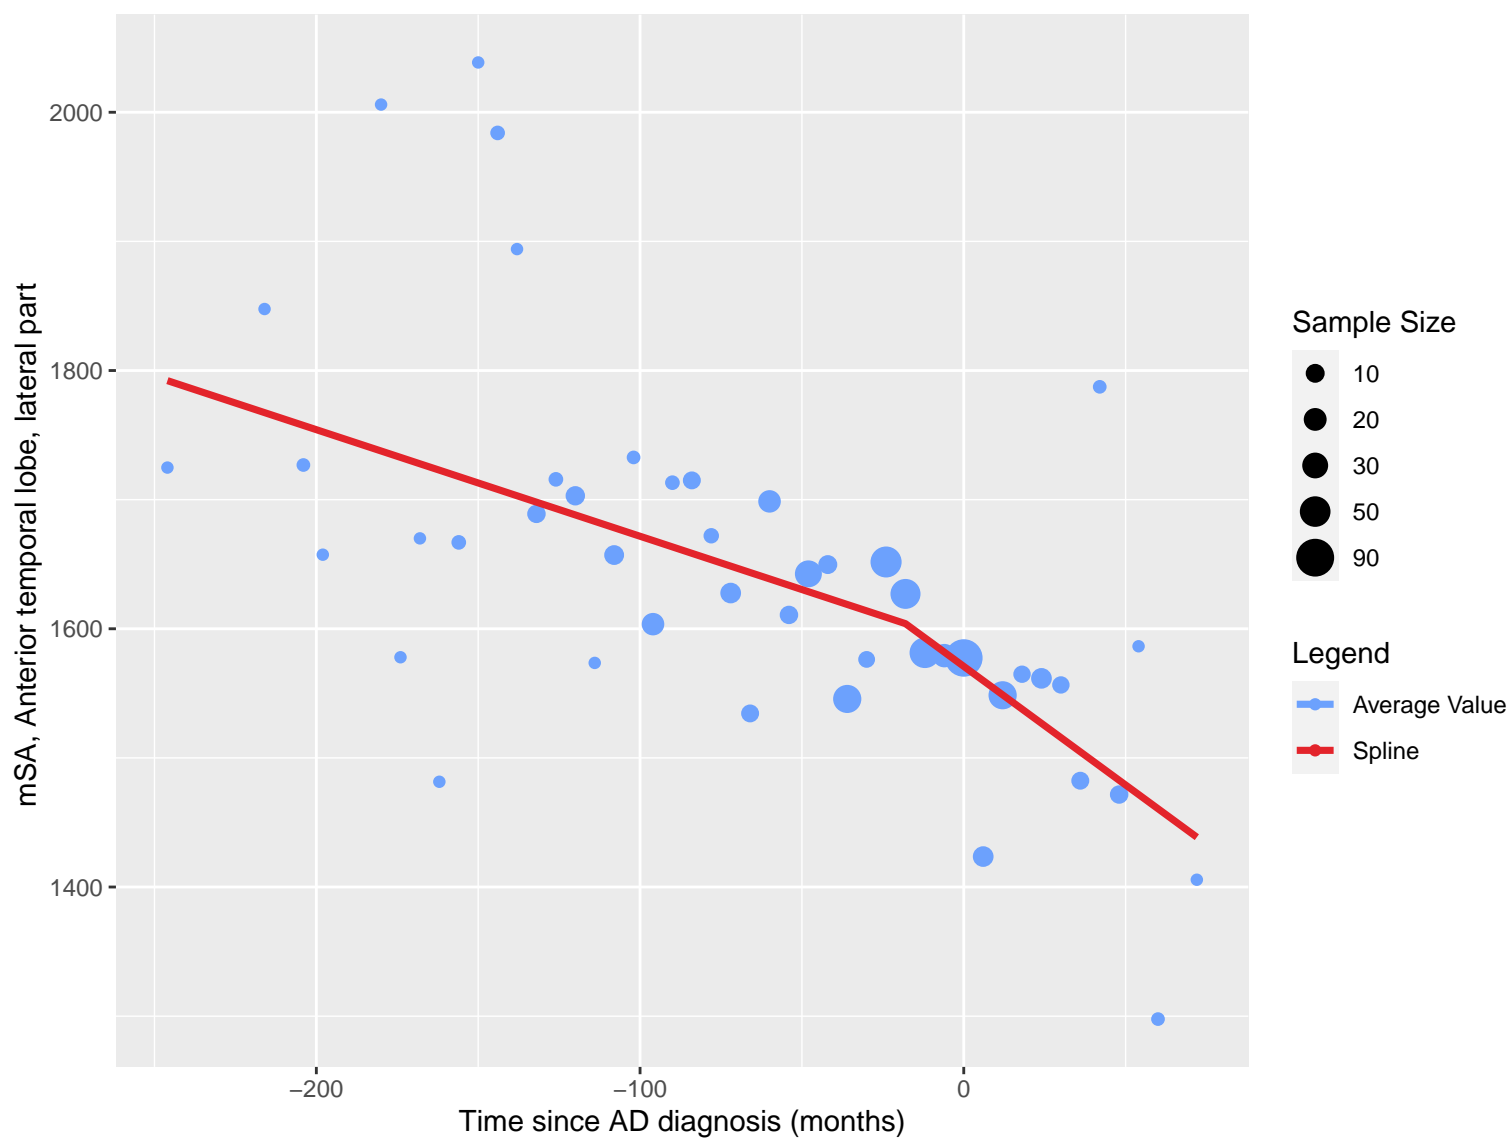

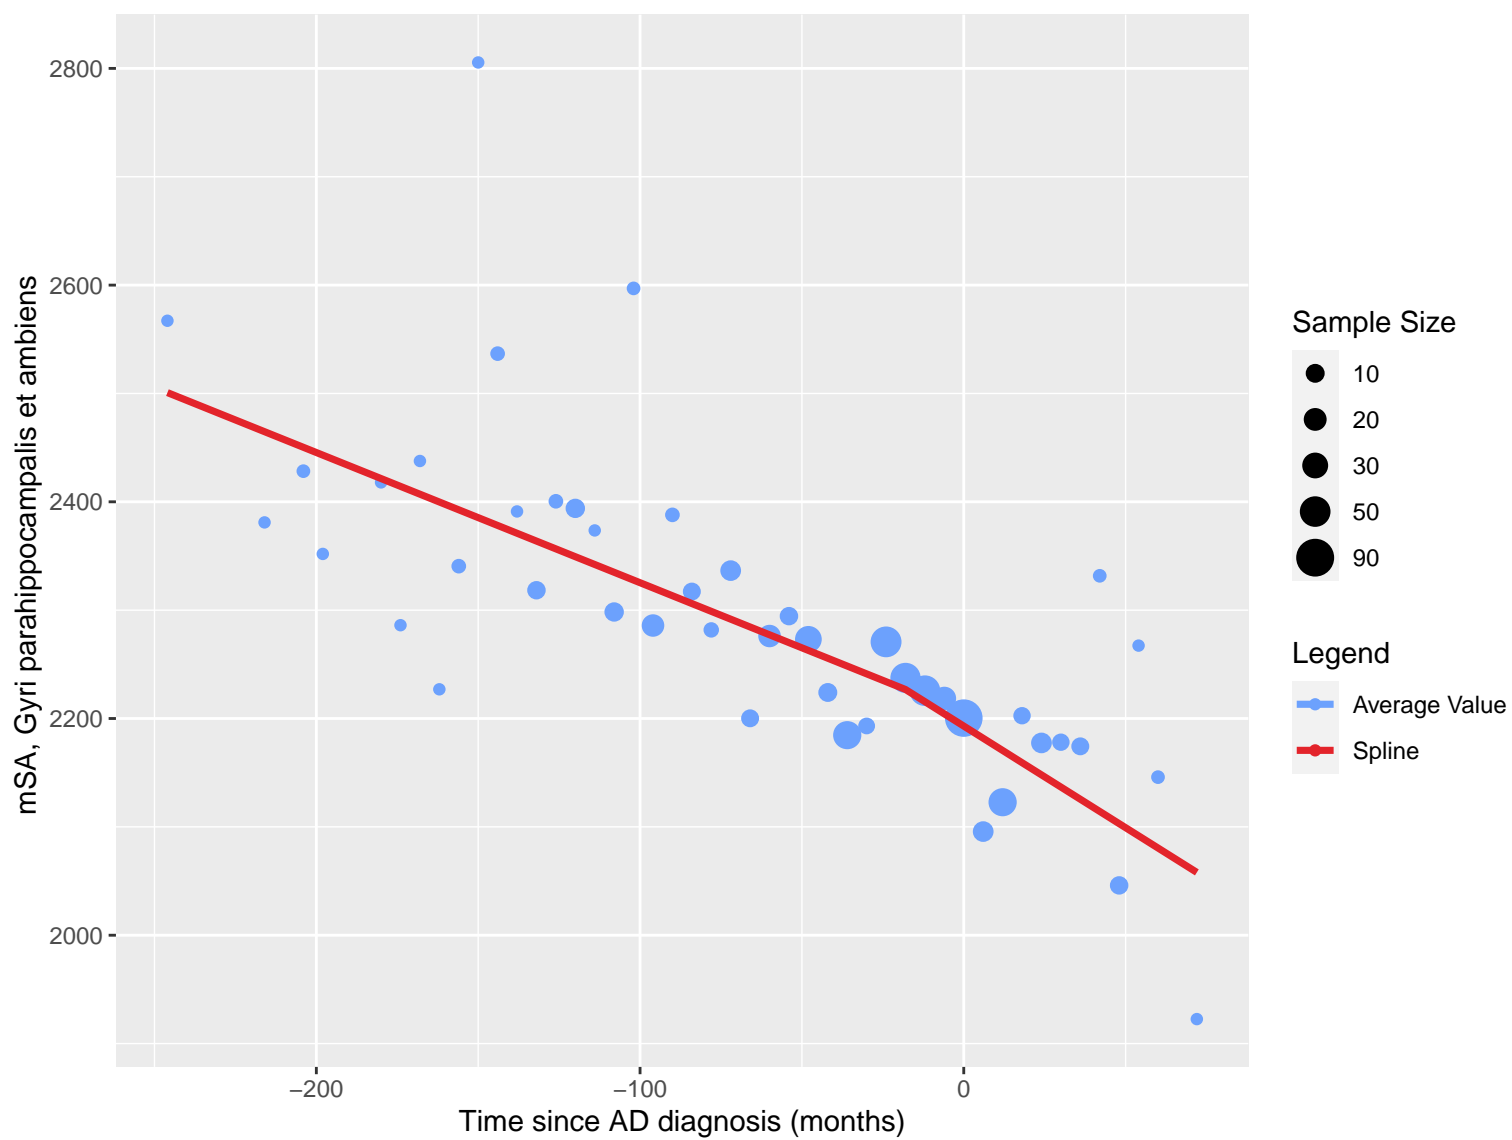

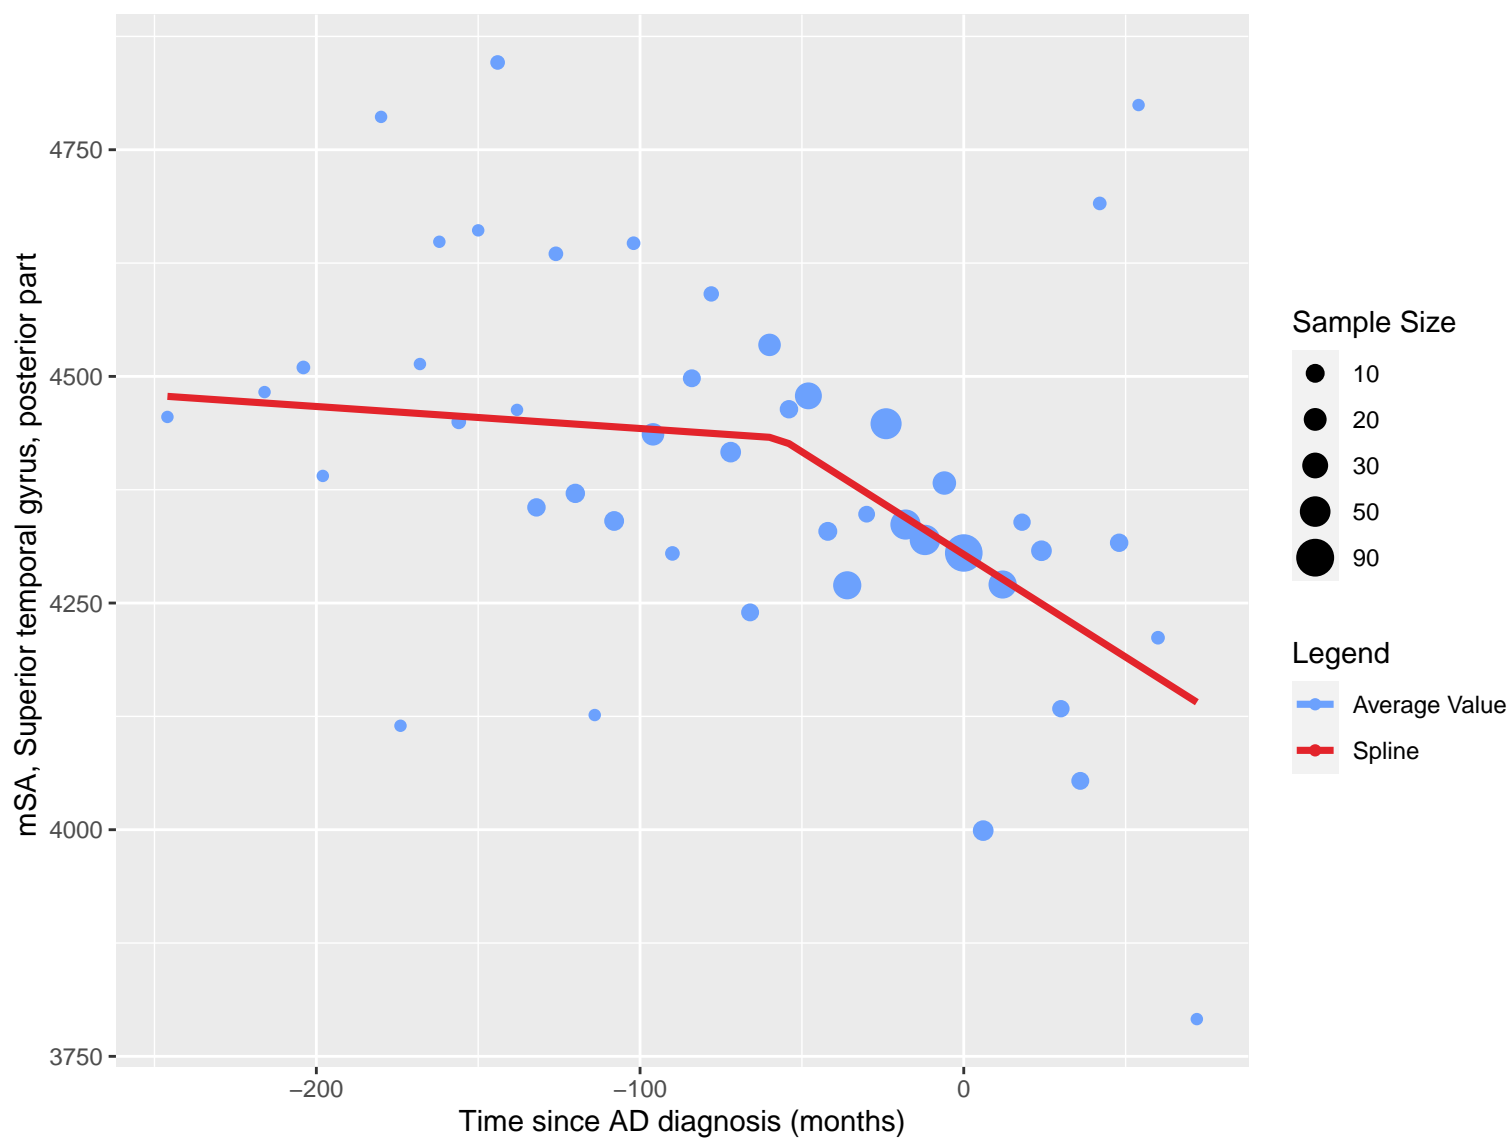

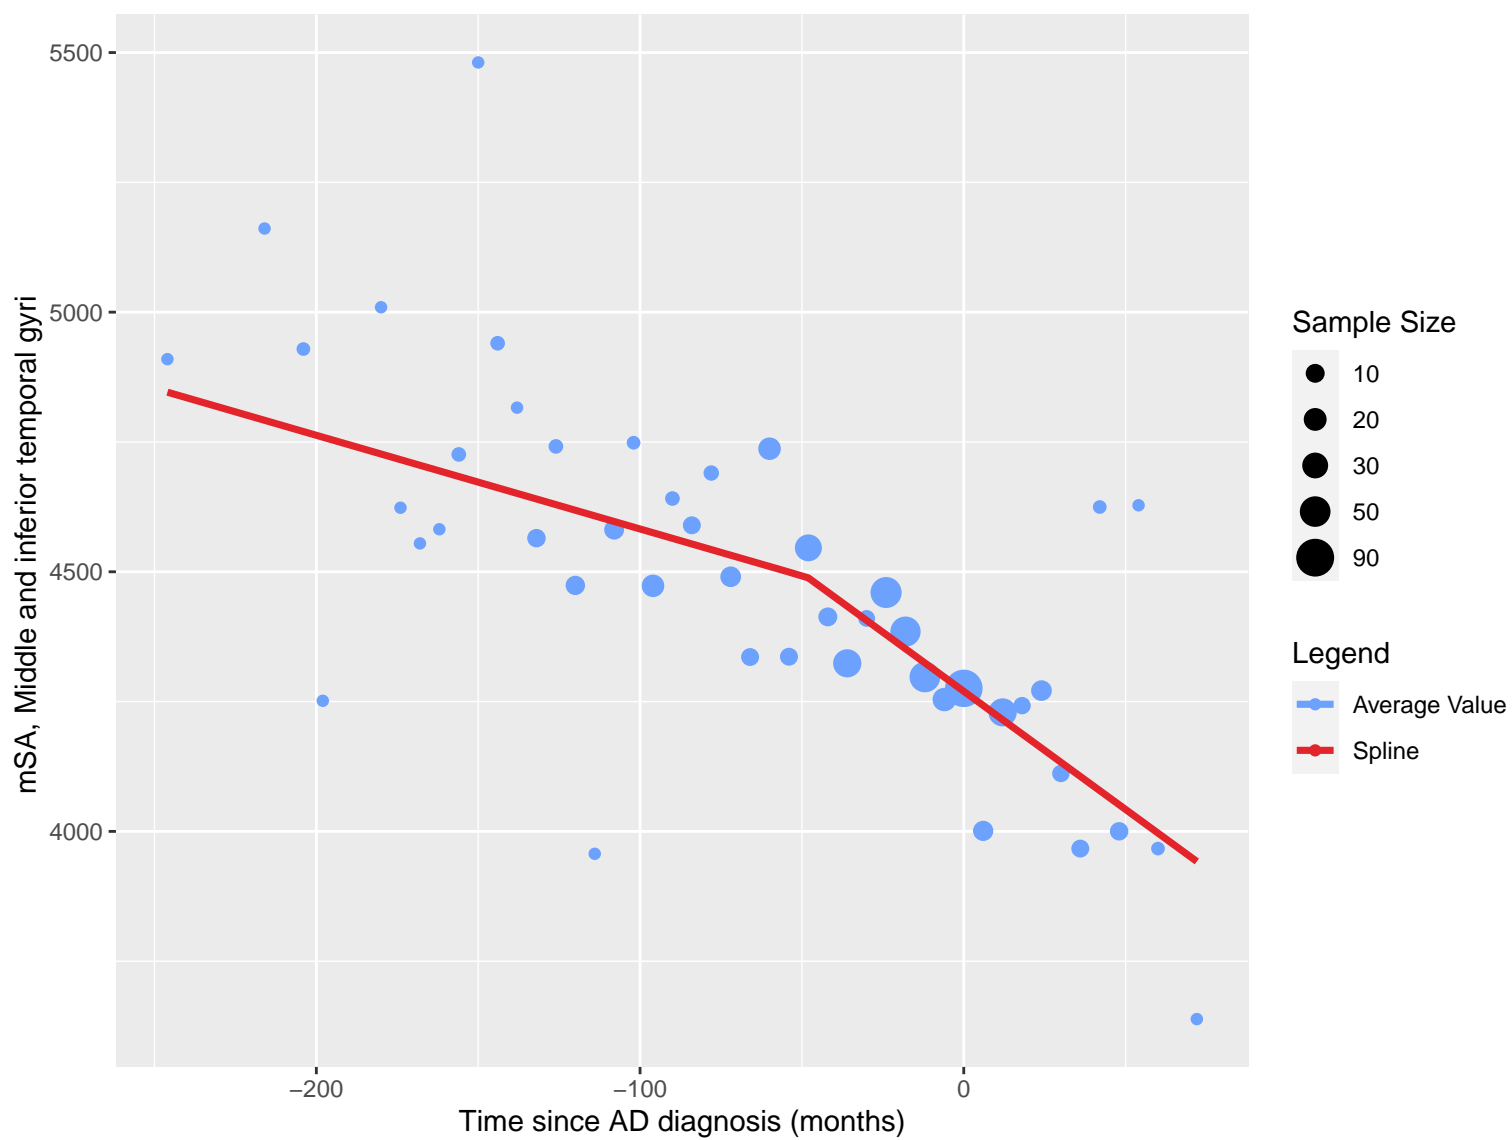

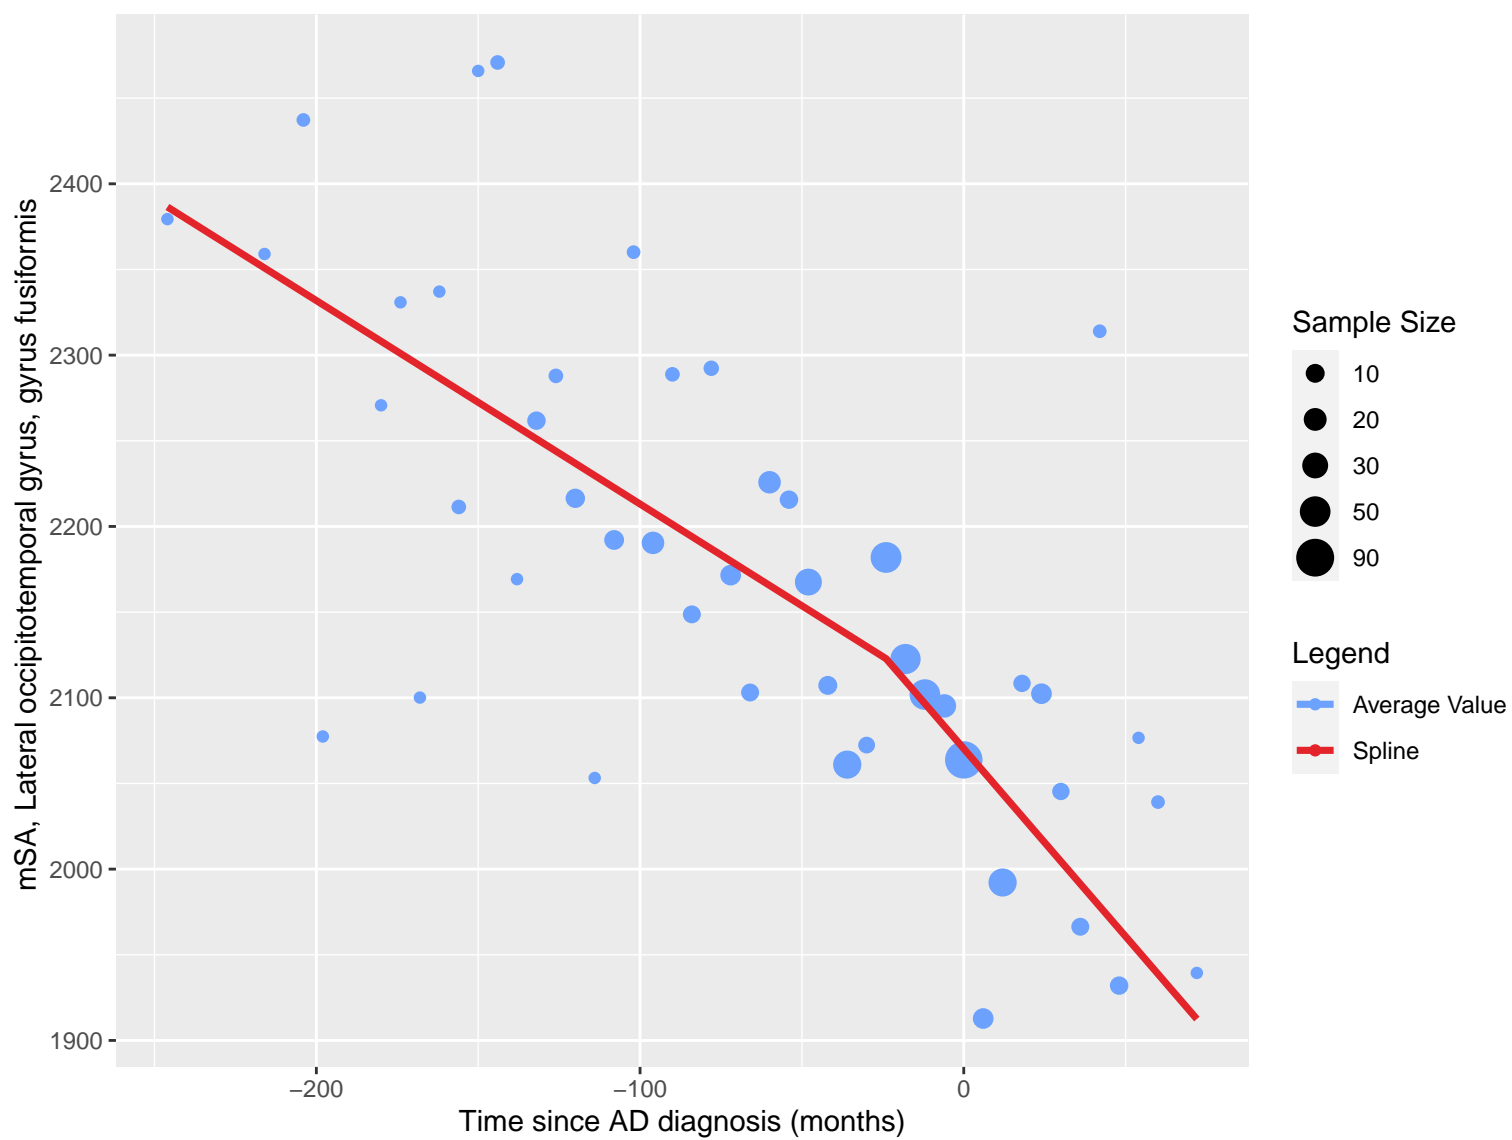

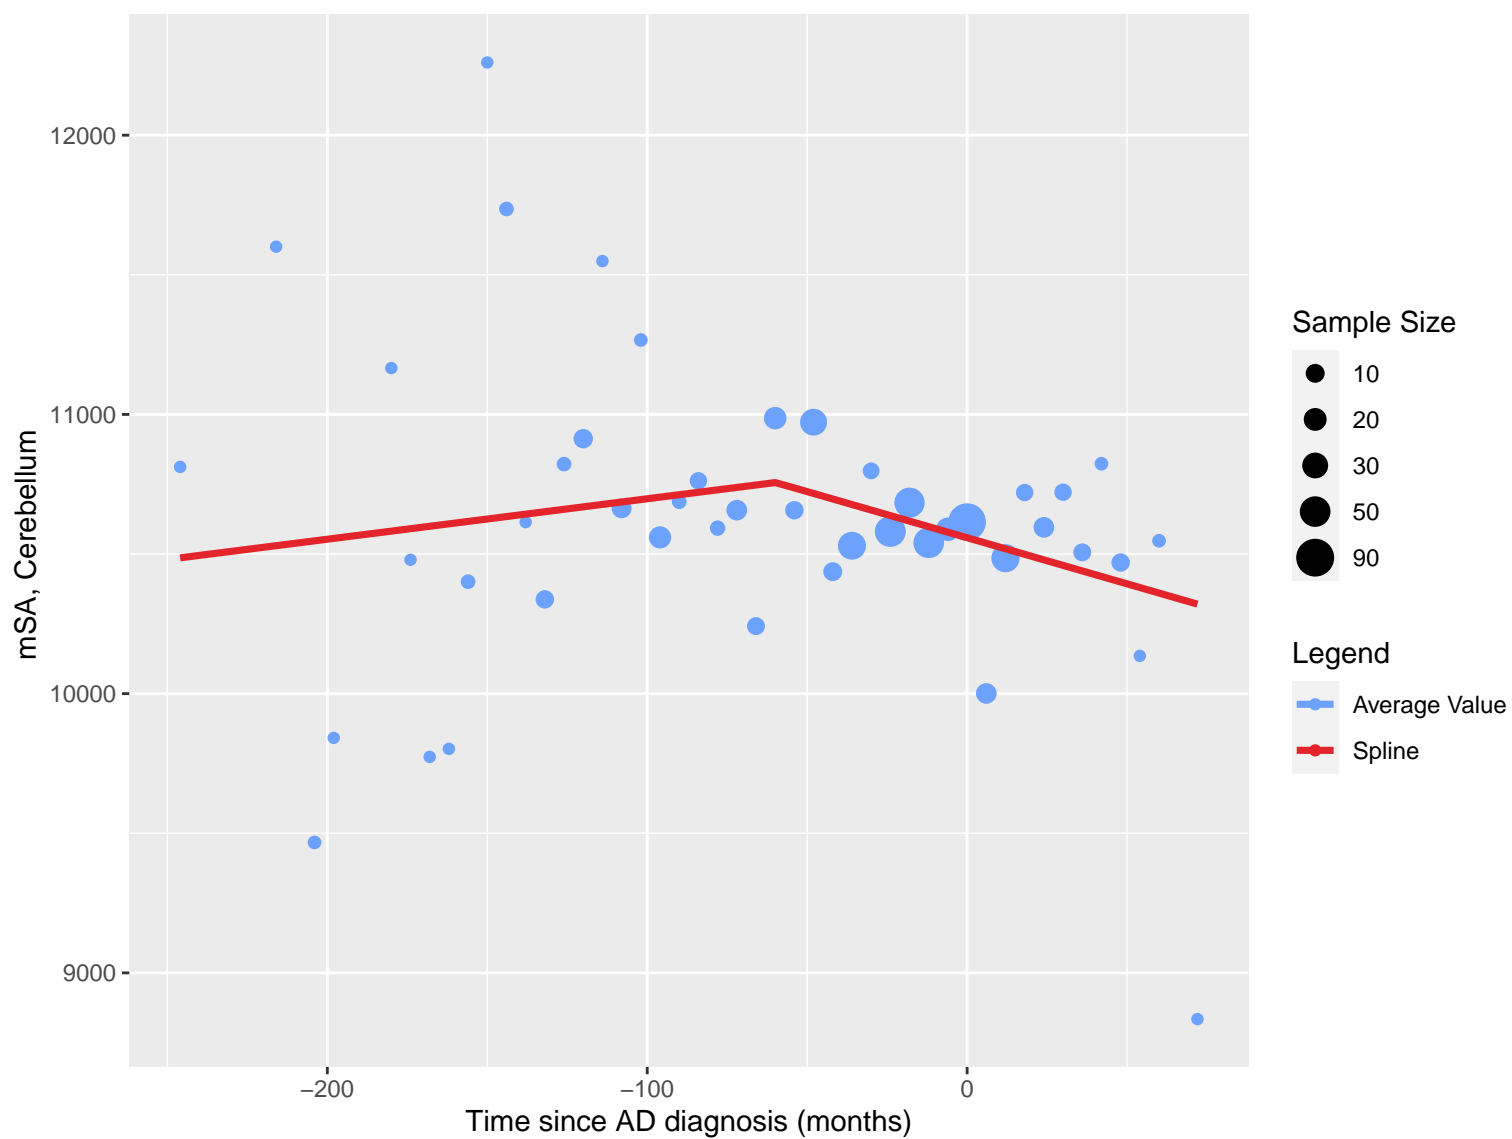

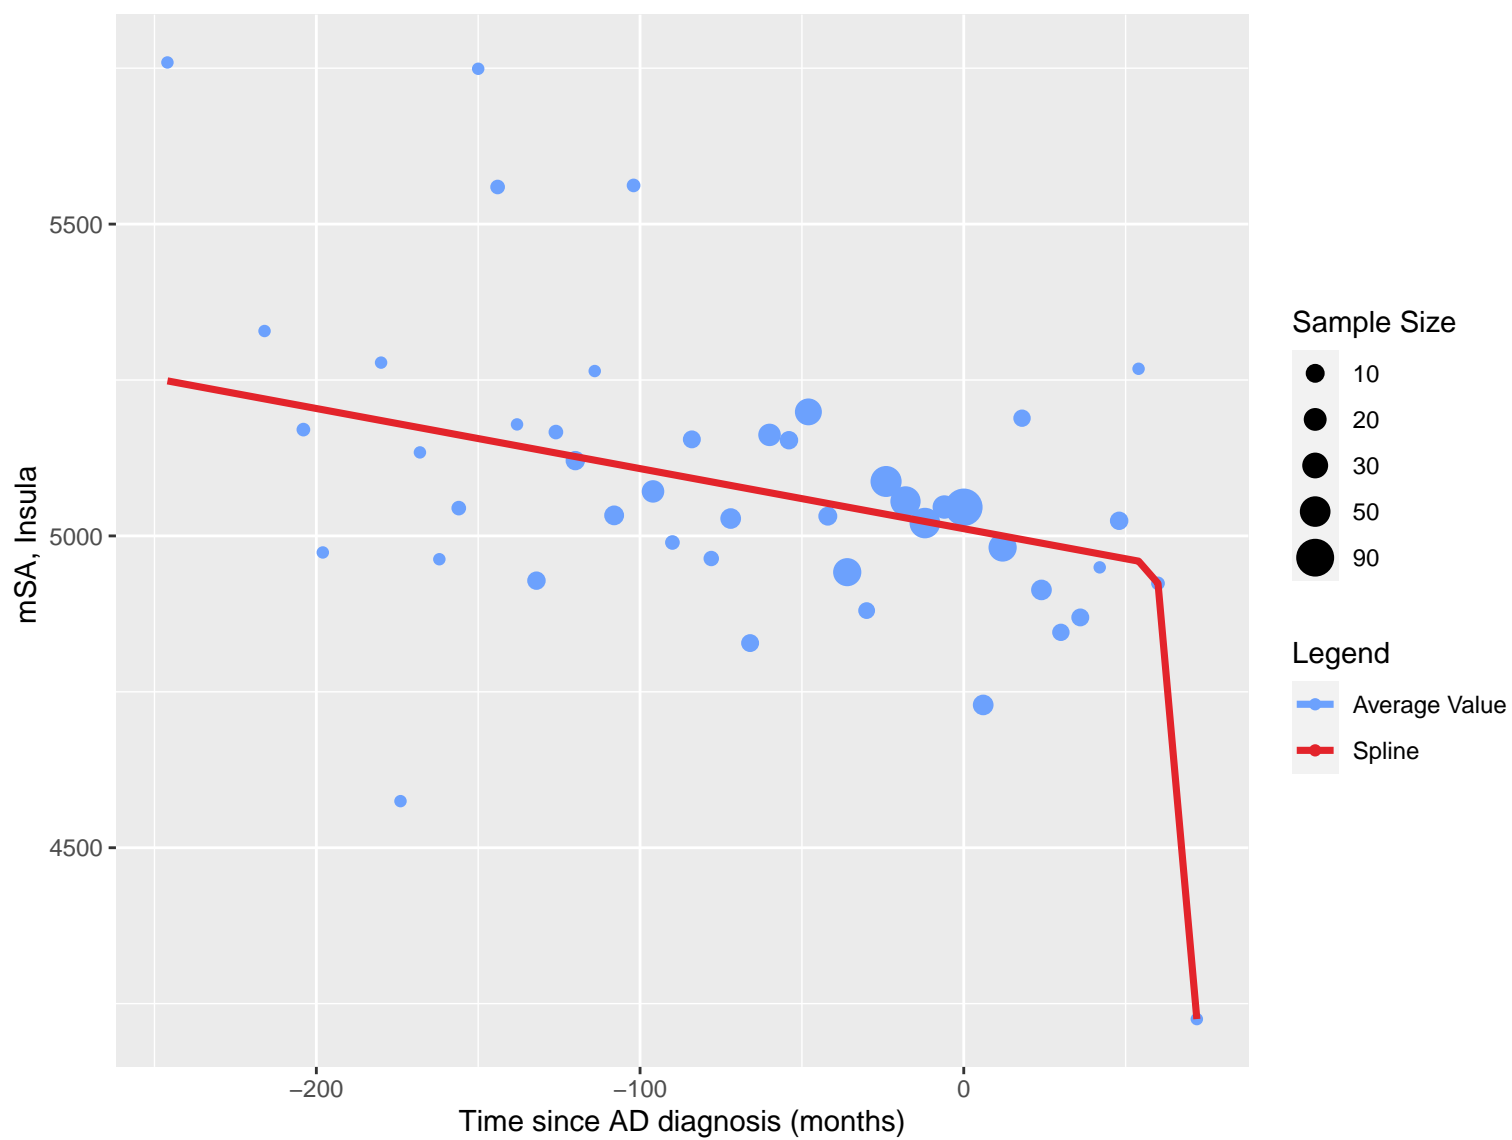



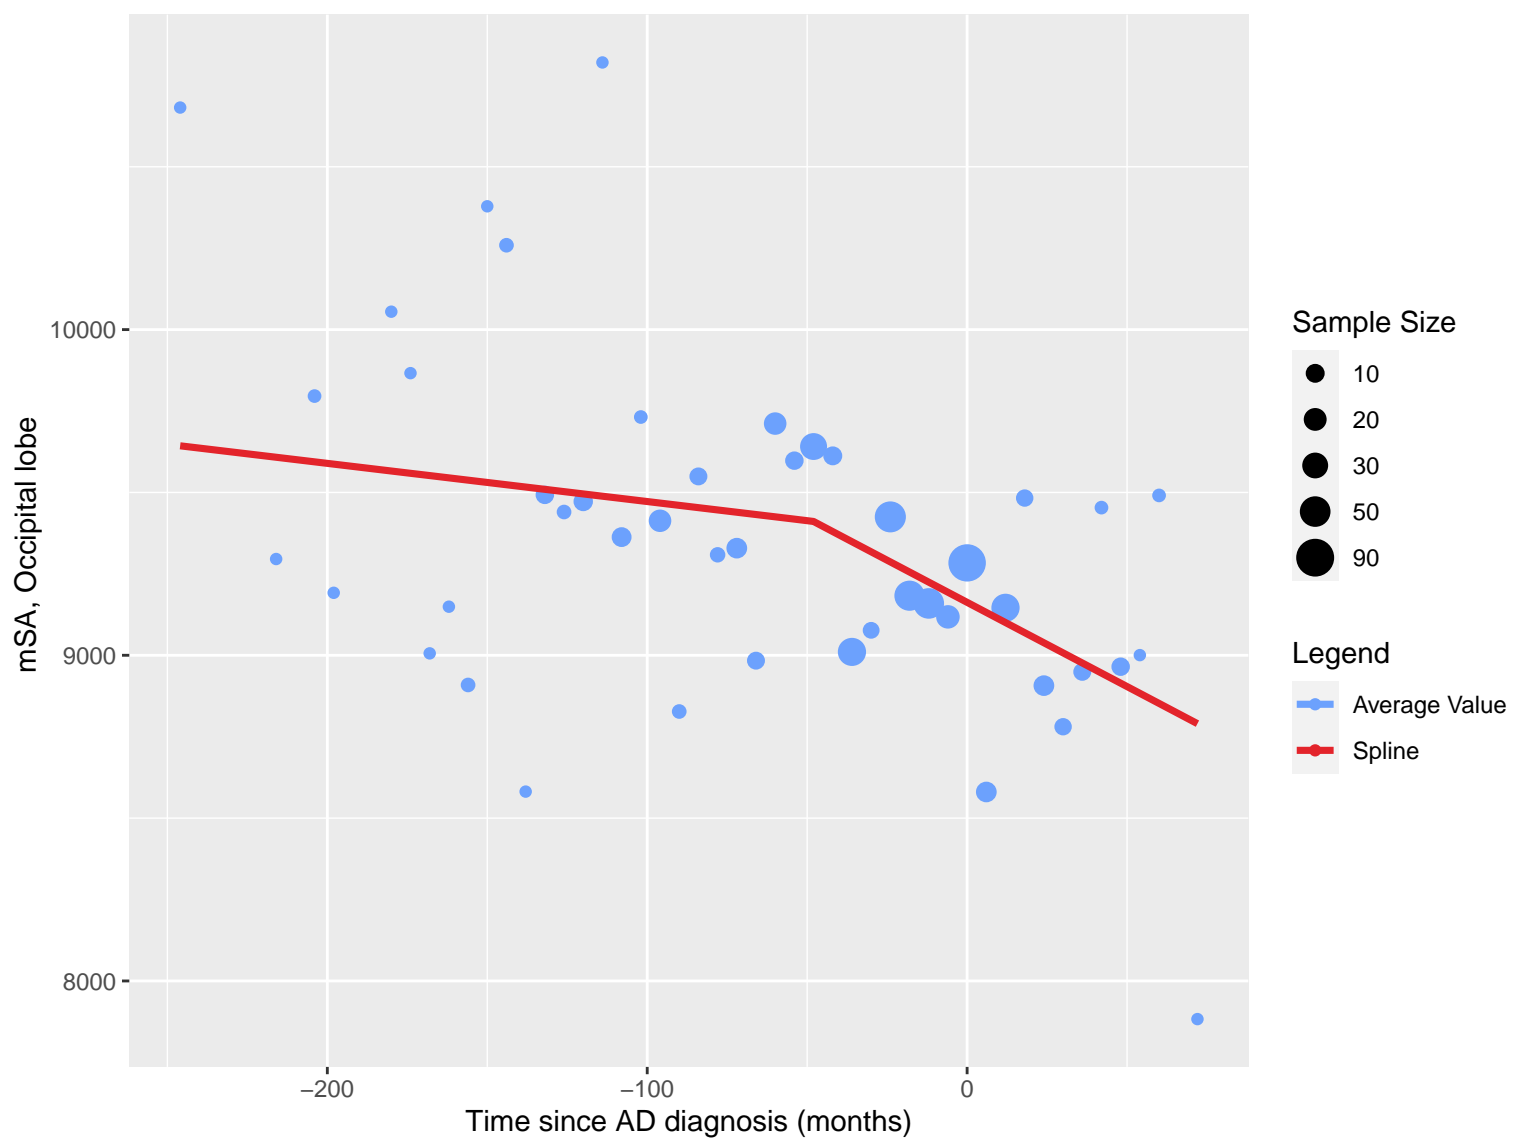

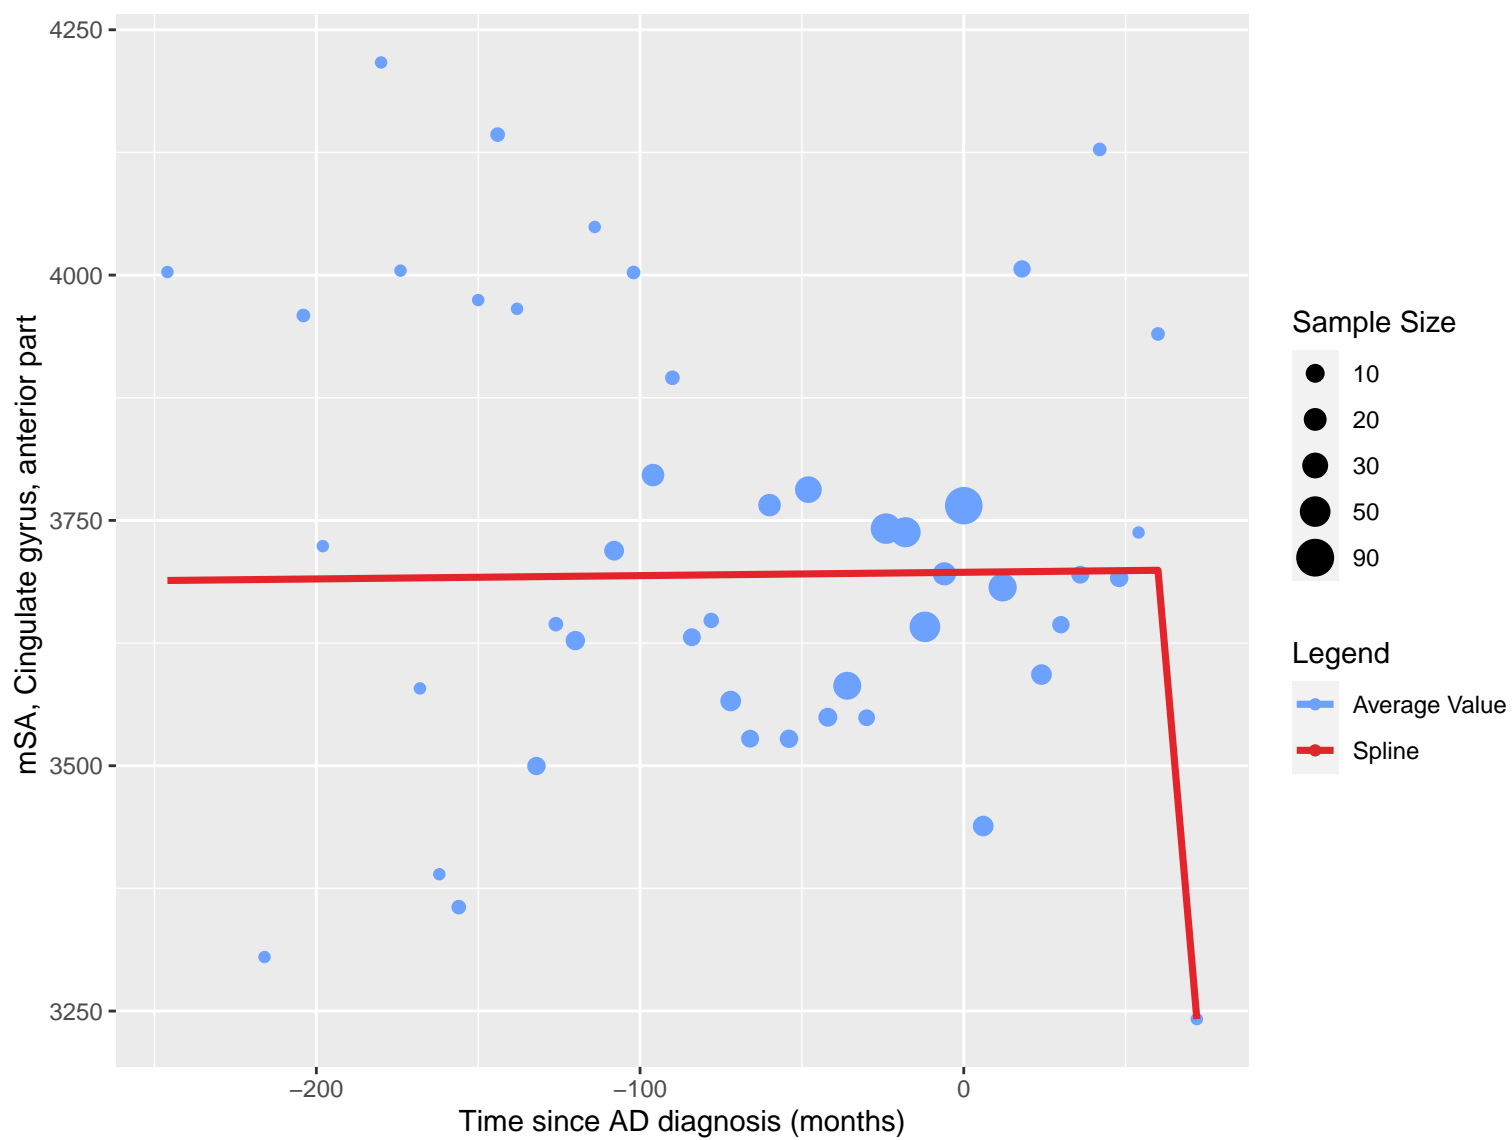

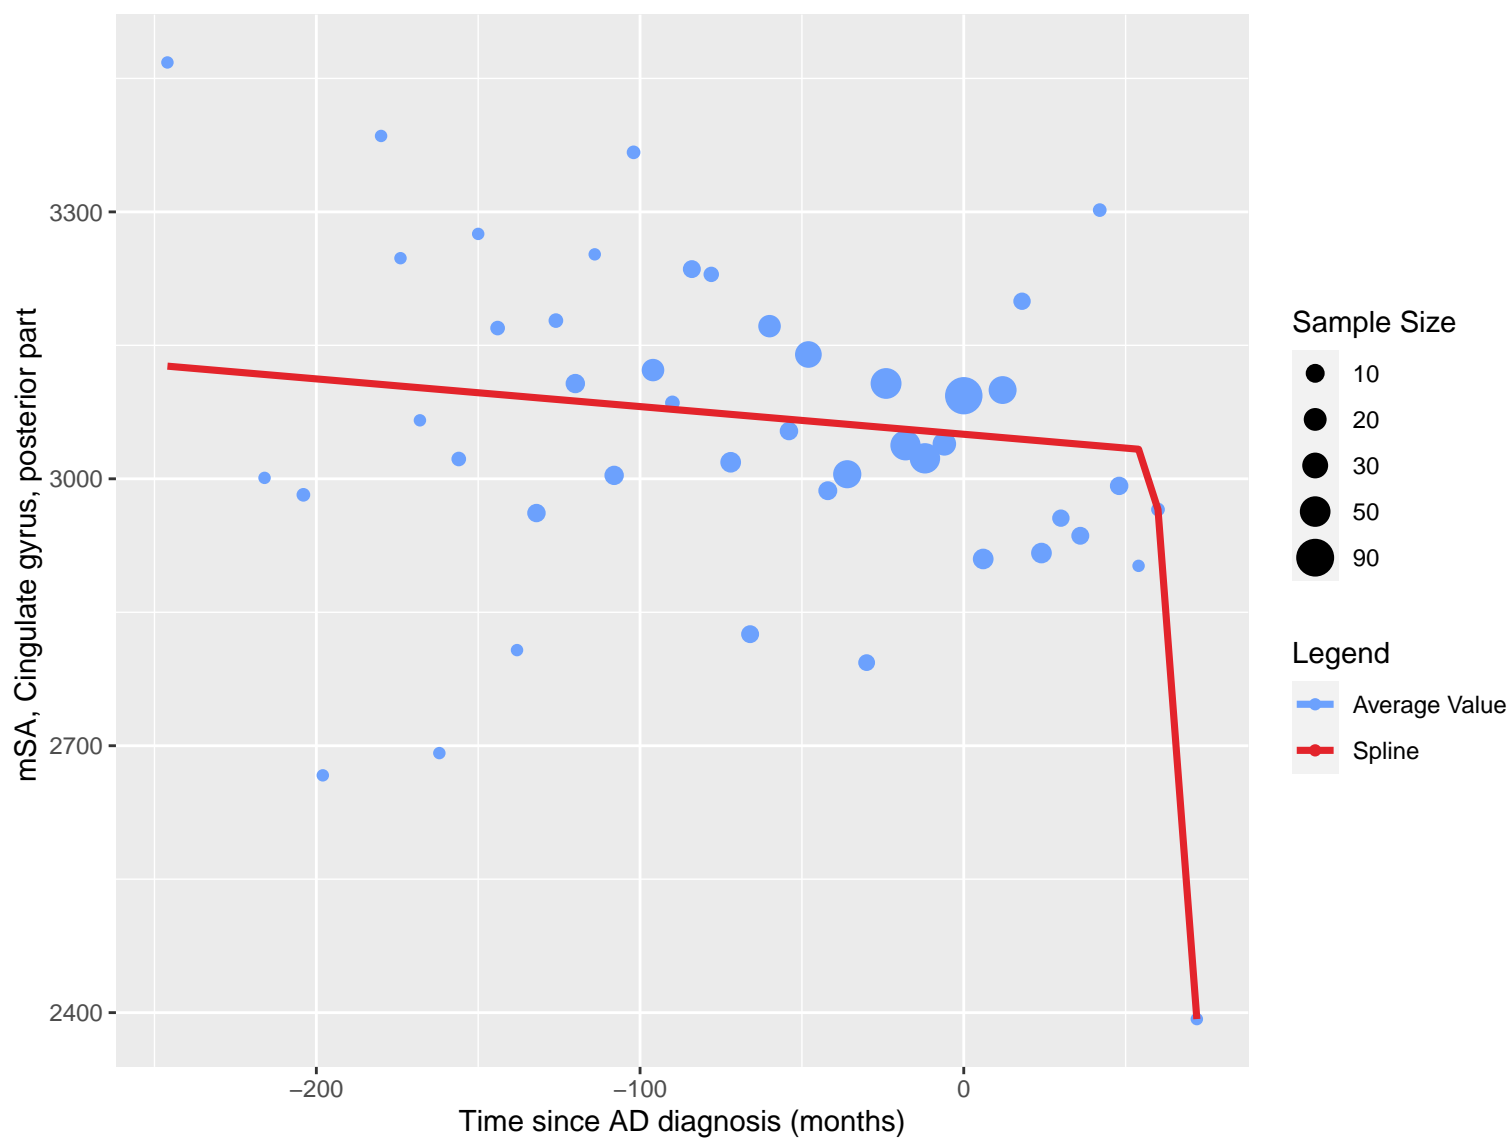

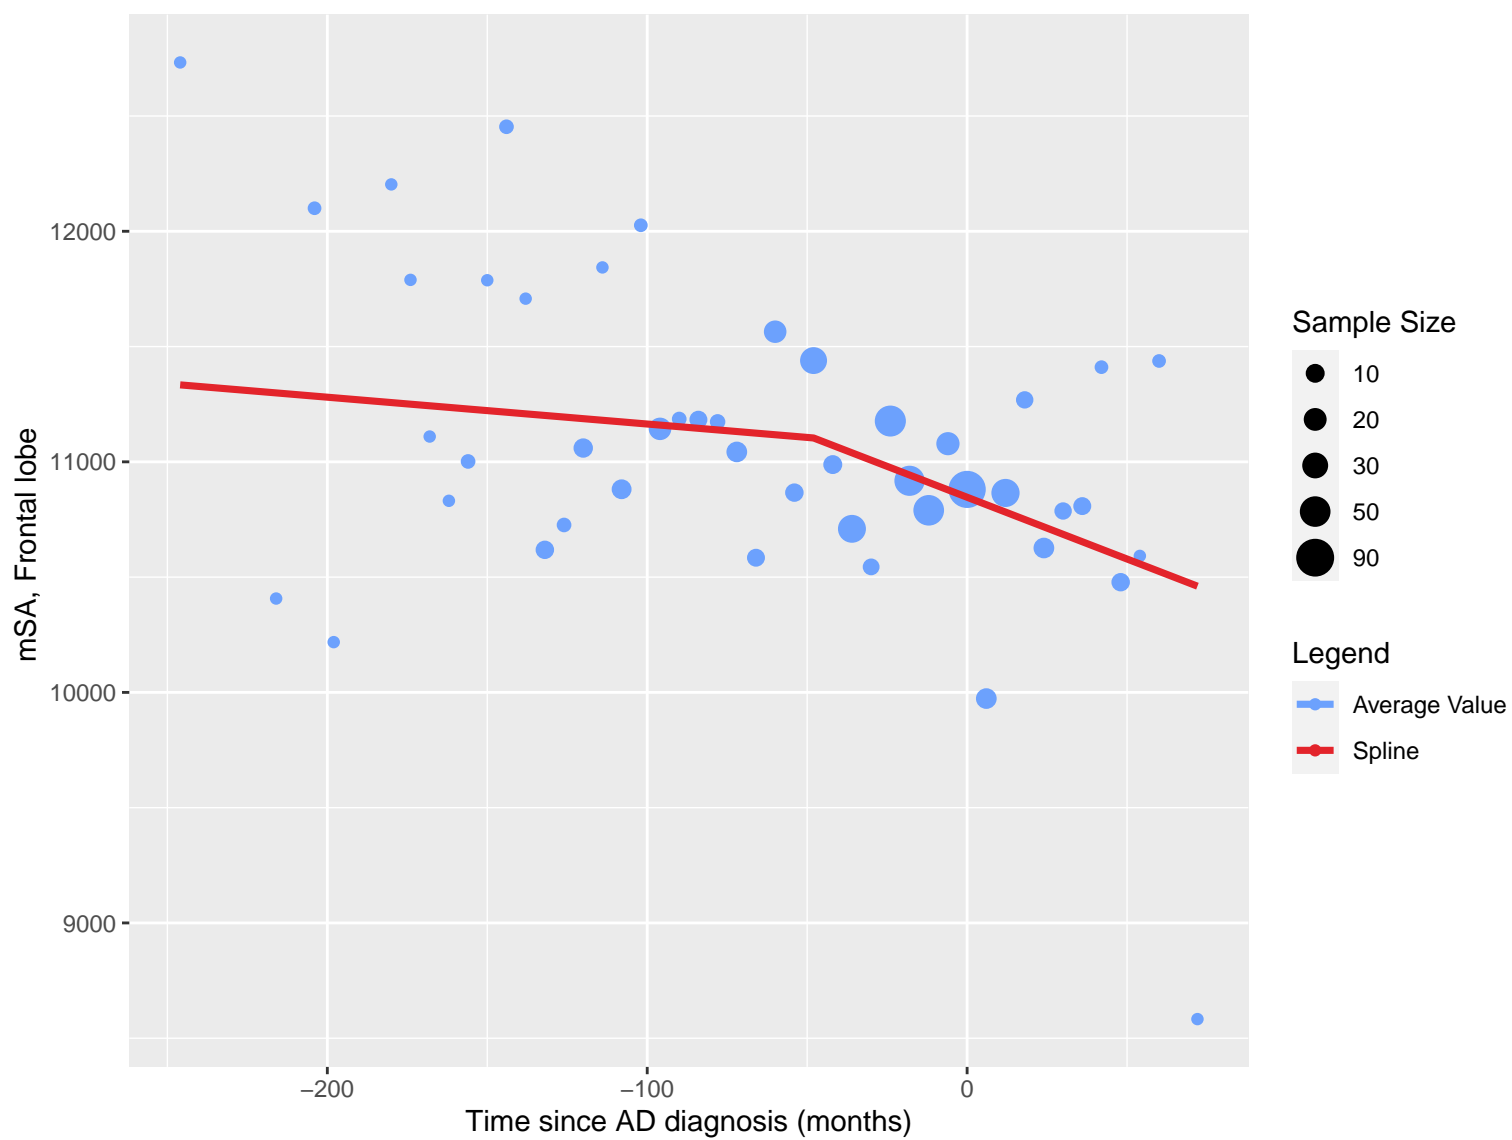

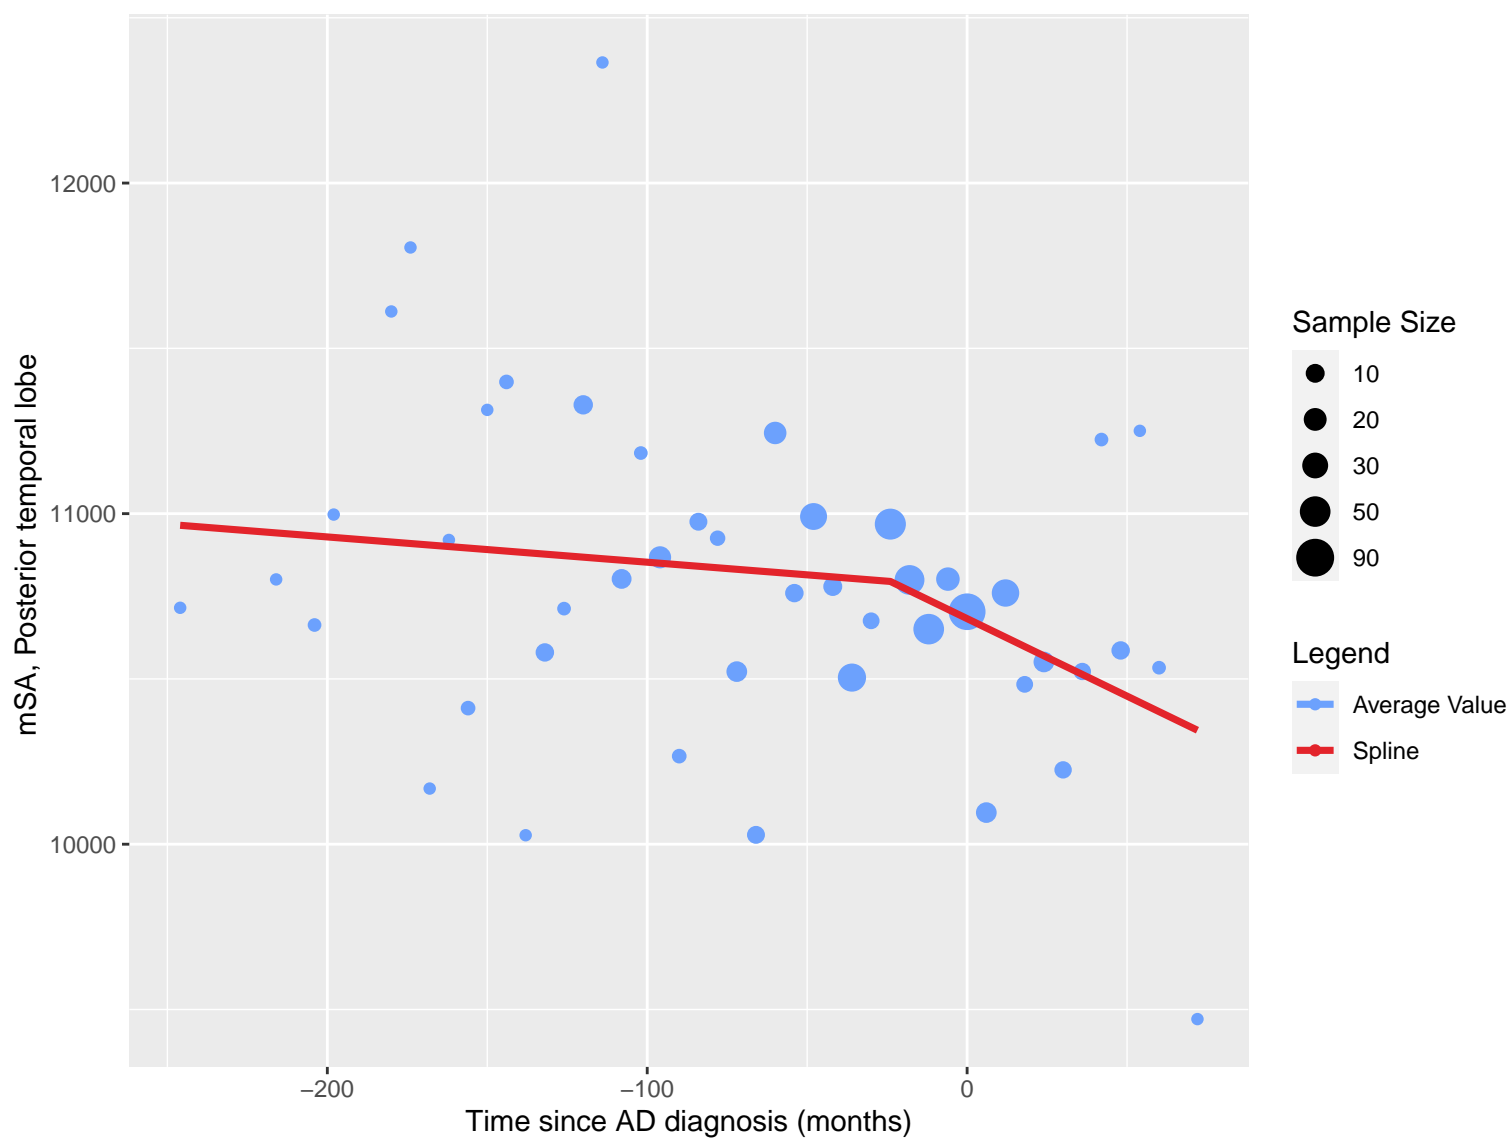

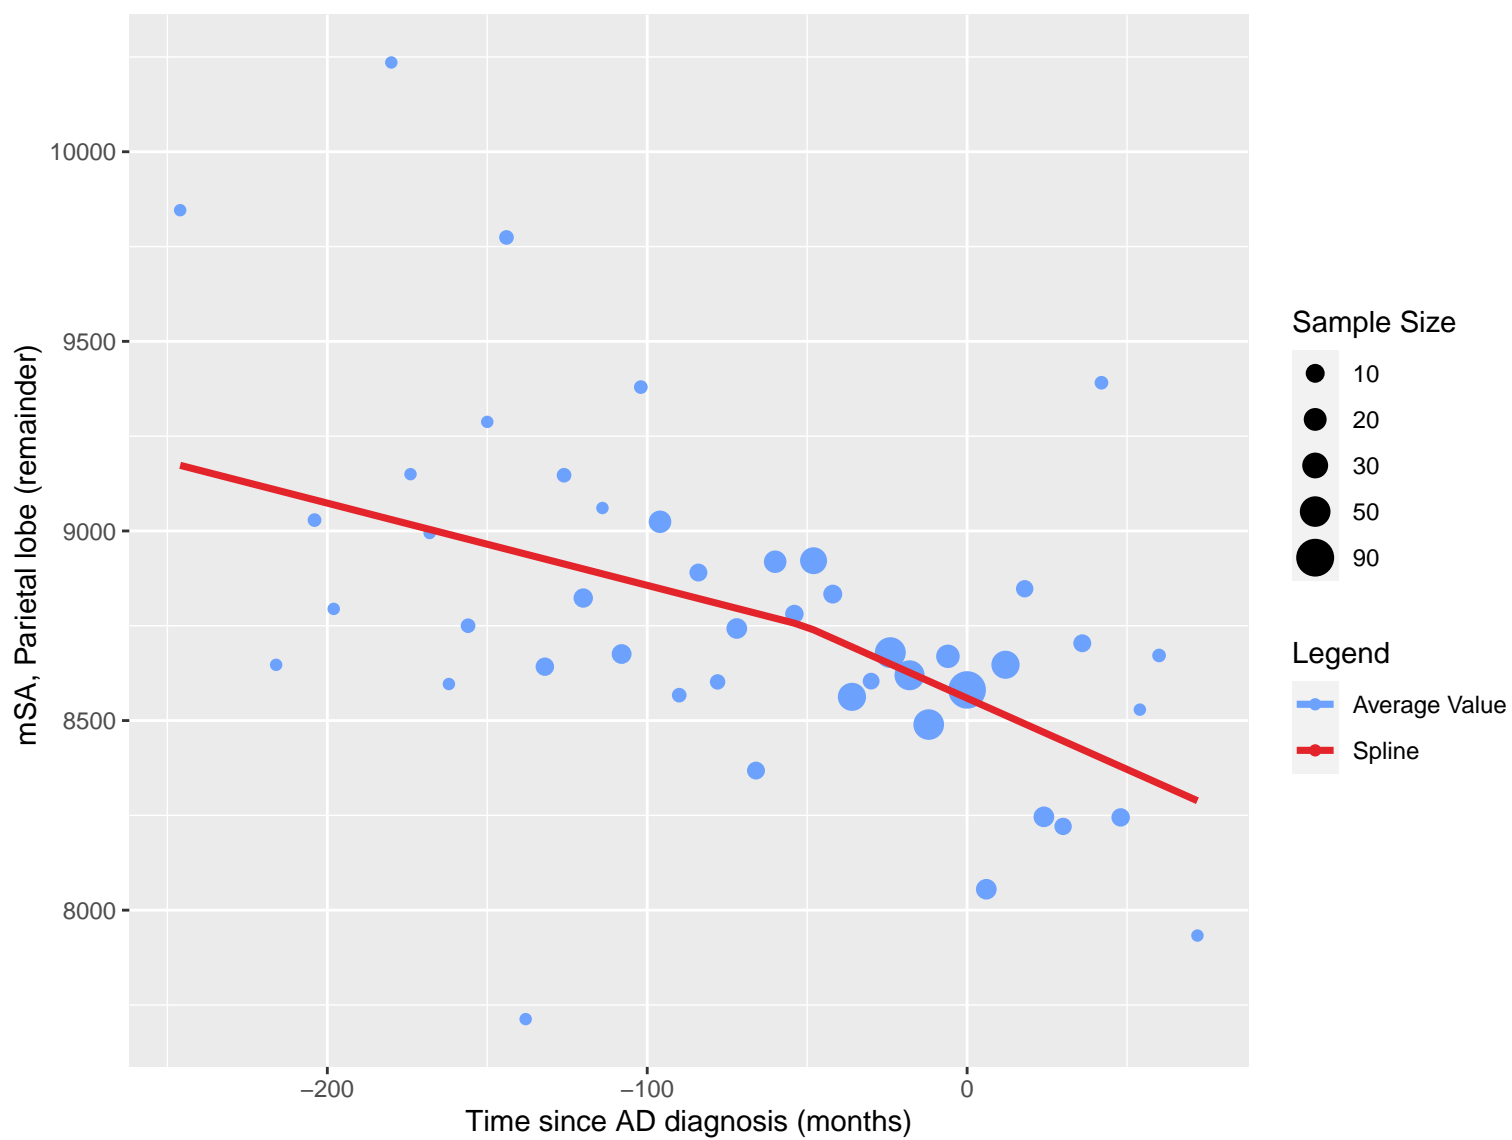

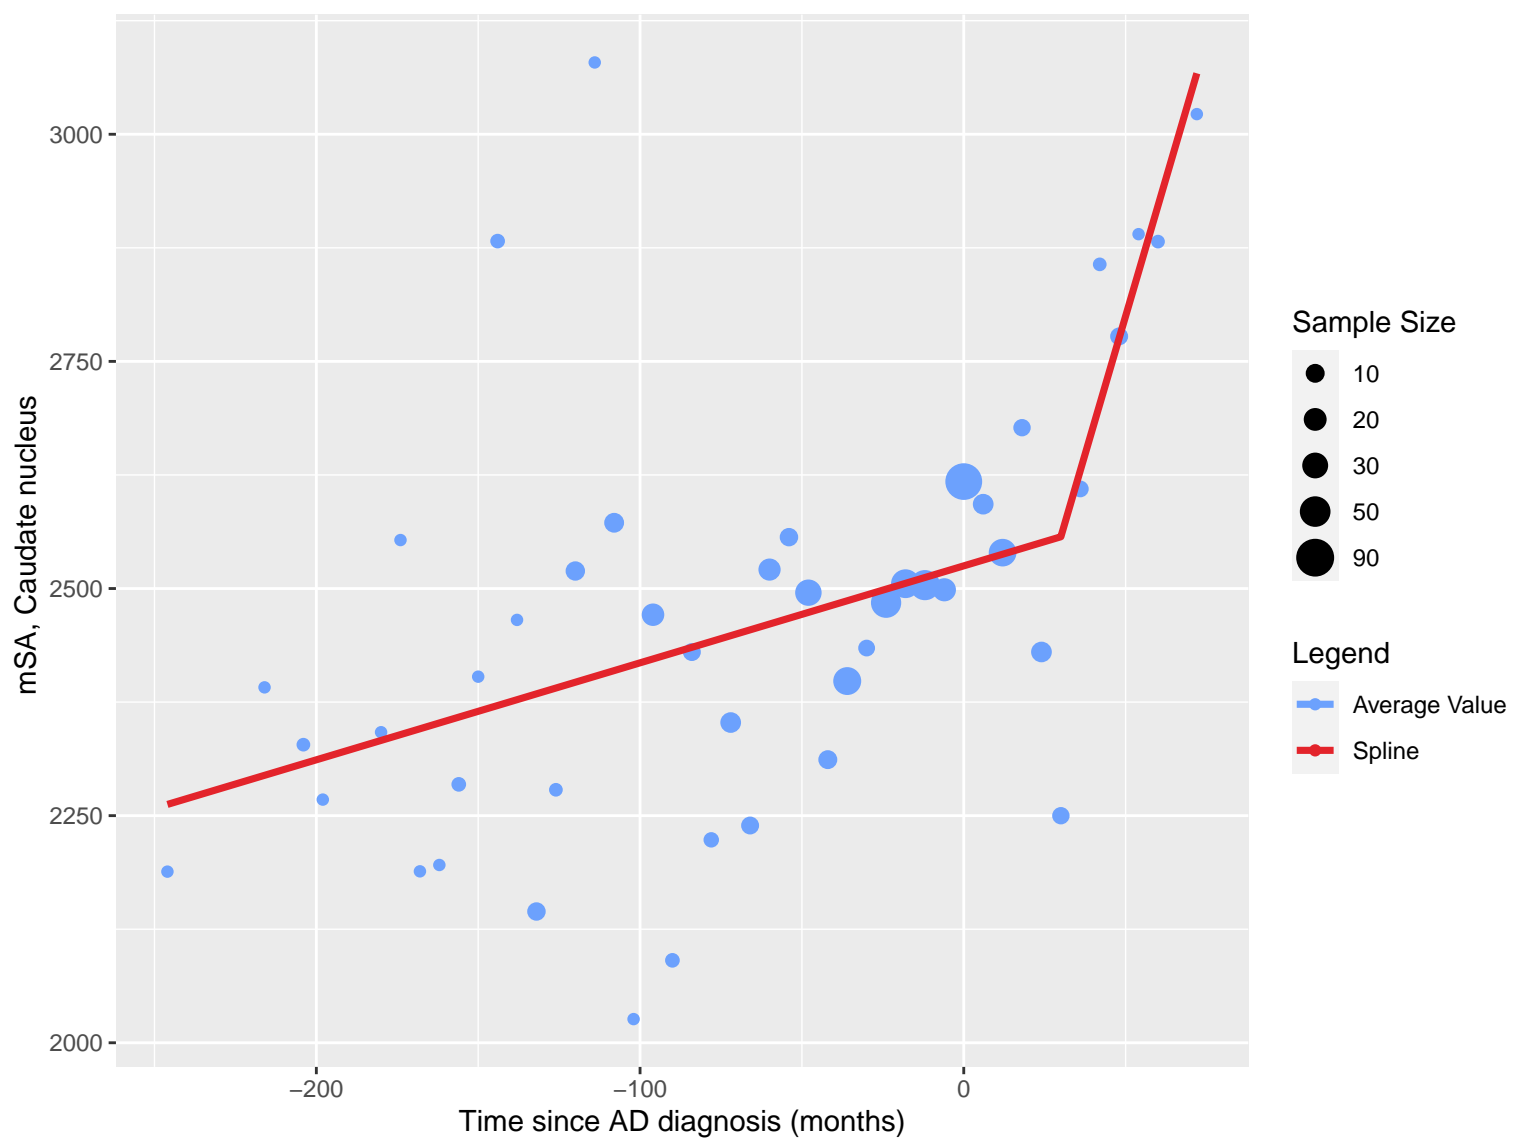

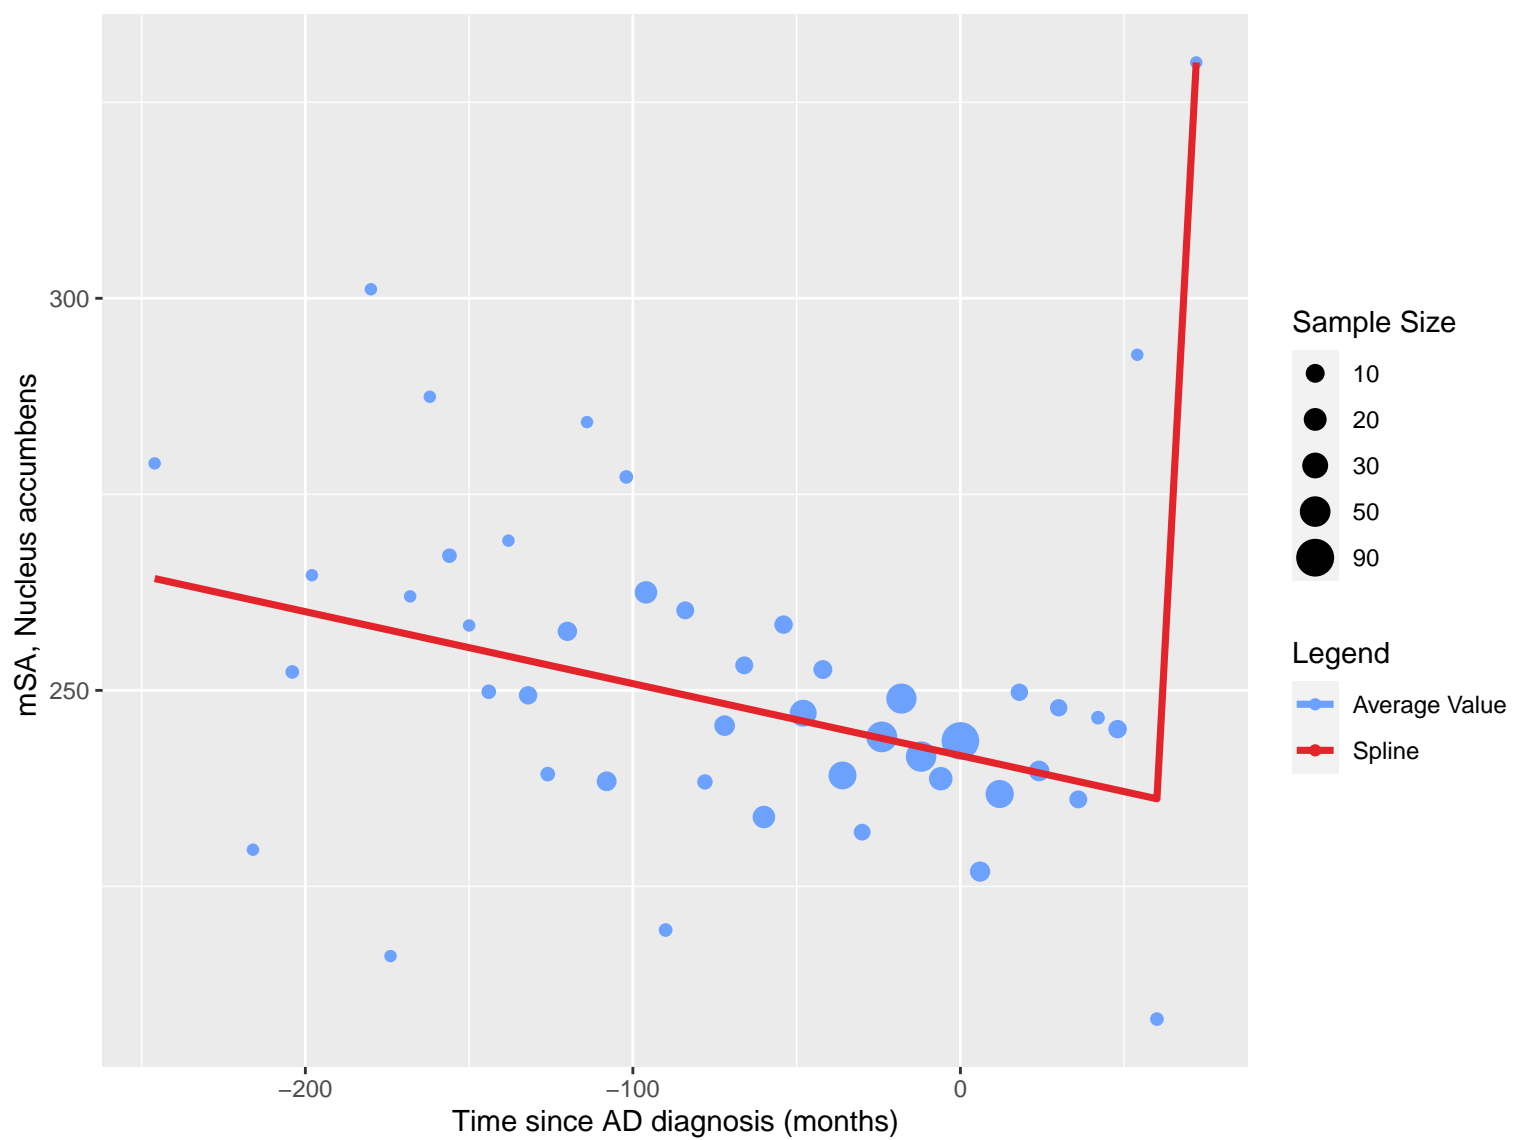



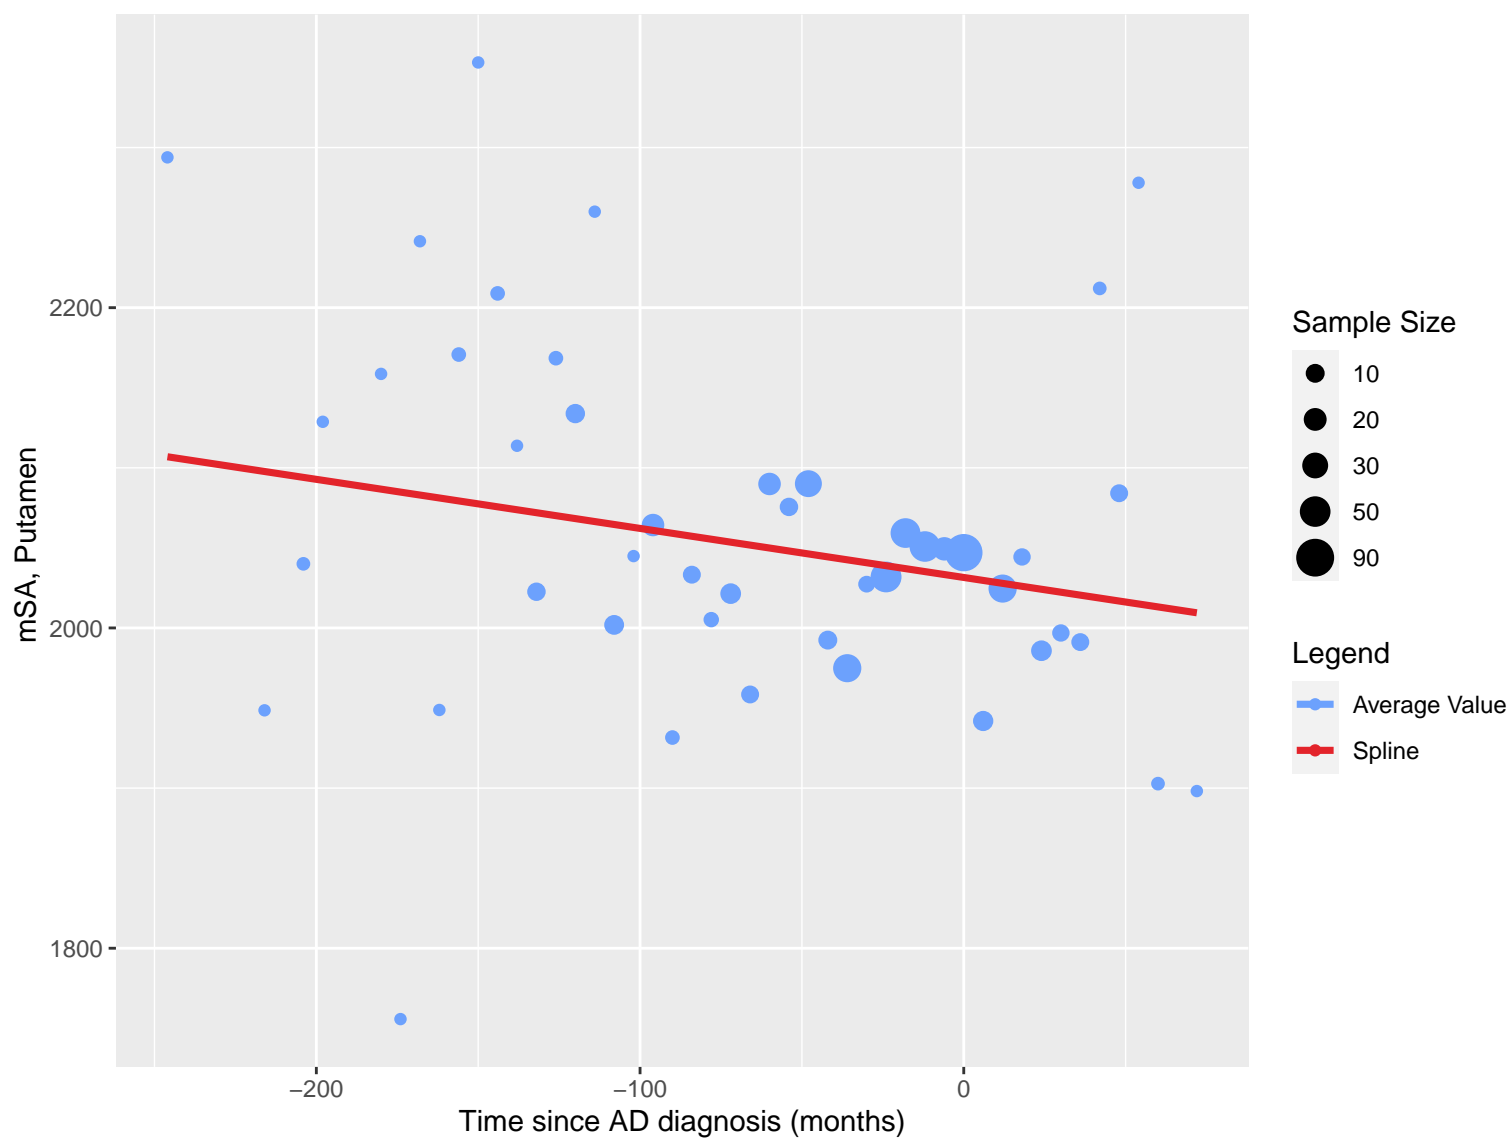

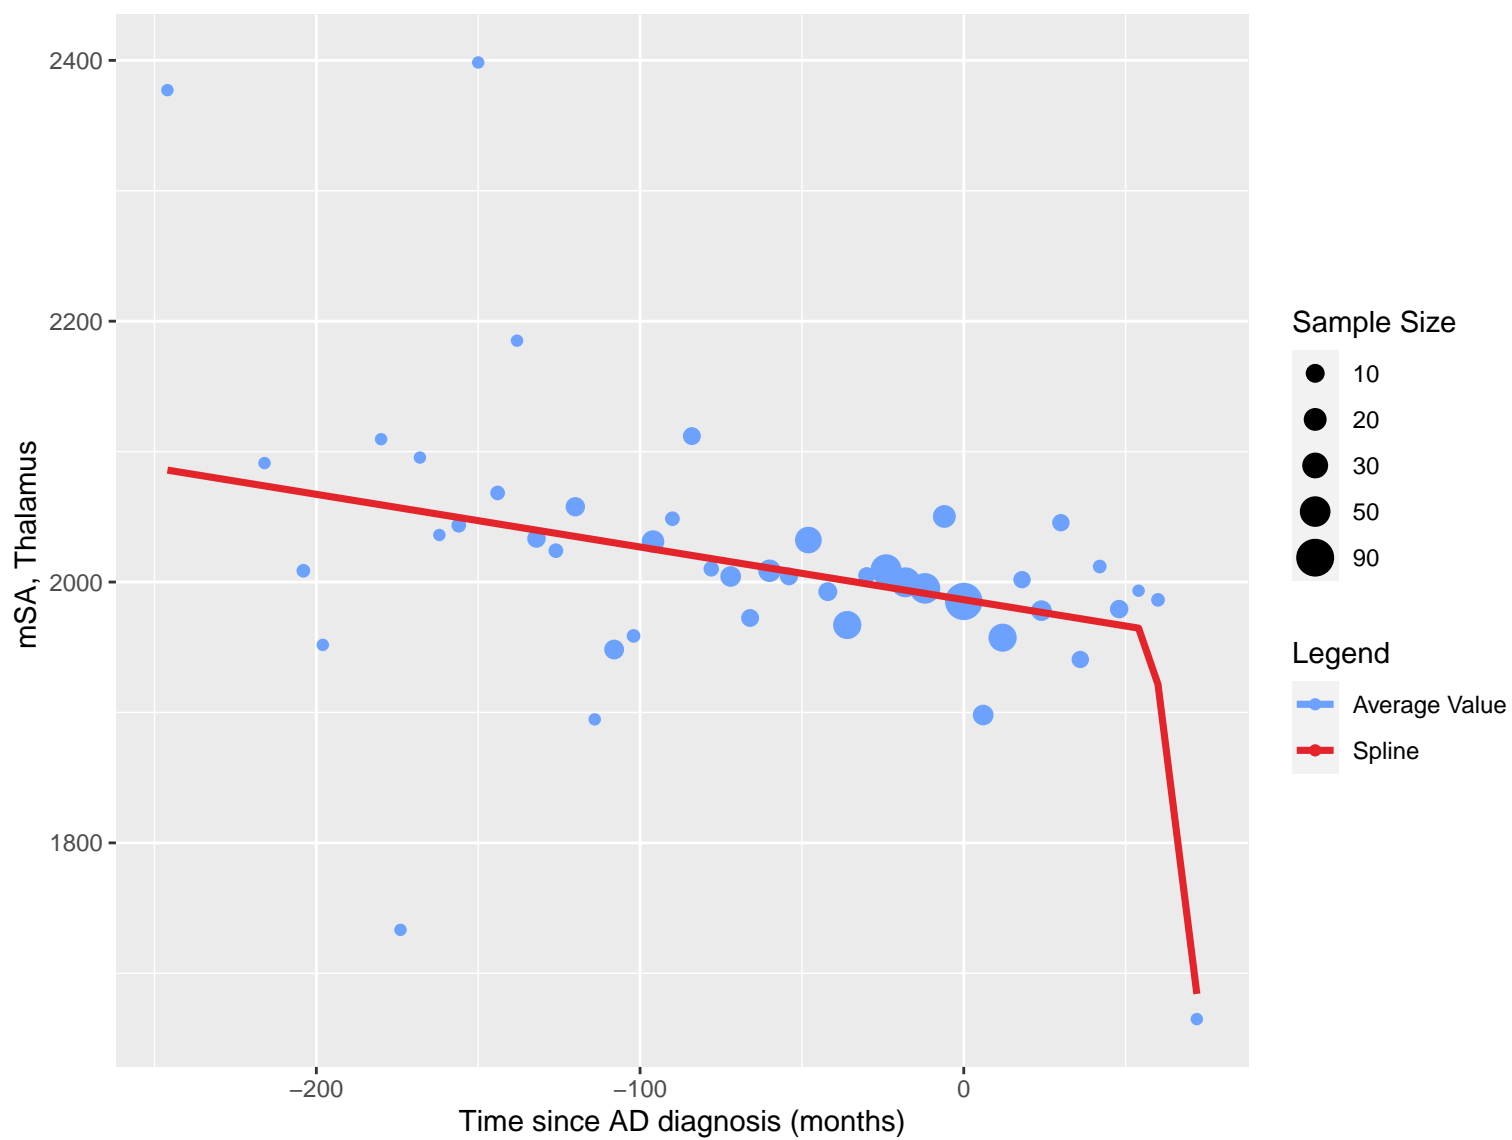

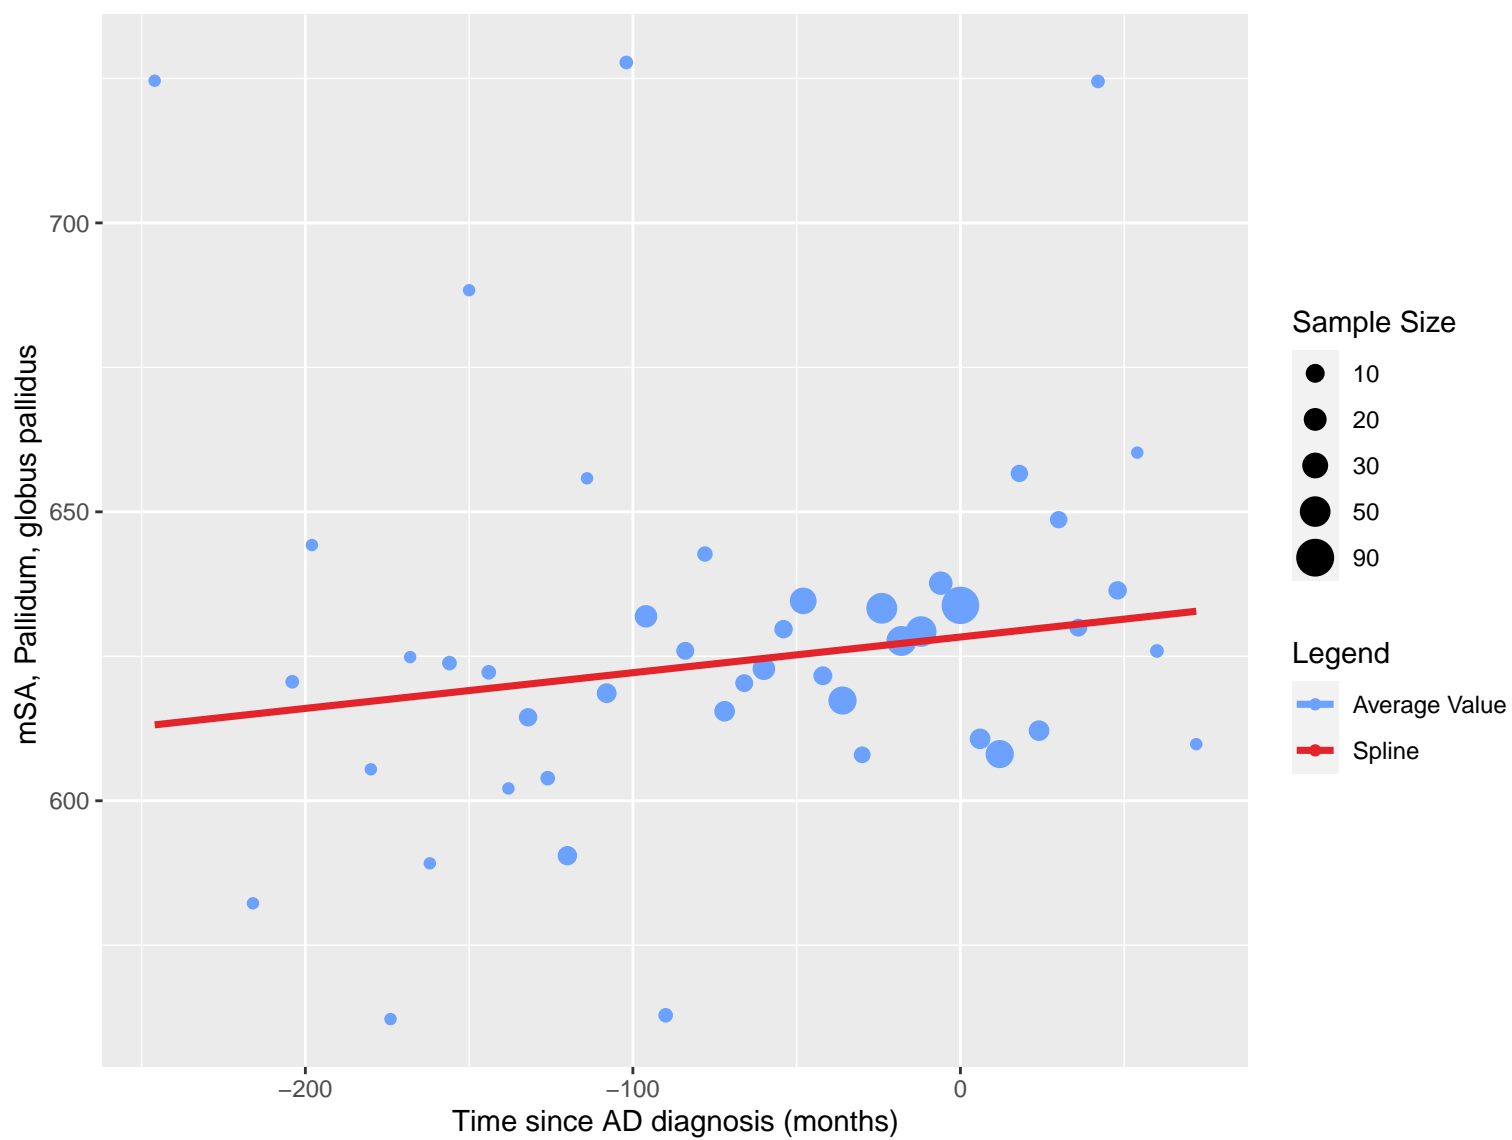

mSA, Lateral ventricle, frontal horn, central part and occipital horn

Time since AD diagnosis (months)

Sample Size



Legend



10000

8000

6000

-200

-100

0

mSA, Lateral ventricle, temporal horn

1000

900

800

-200

-100

0

Time since AD diagnosis (months)

Sample Size

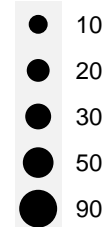

Legend

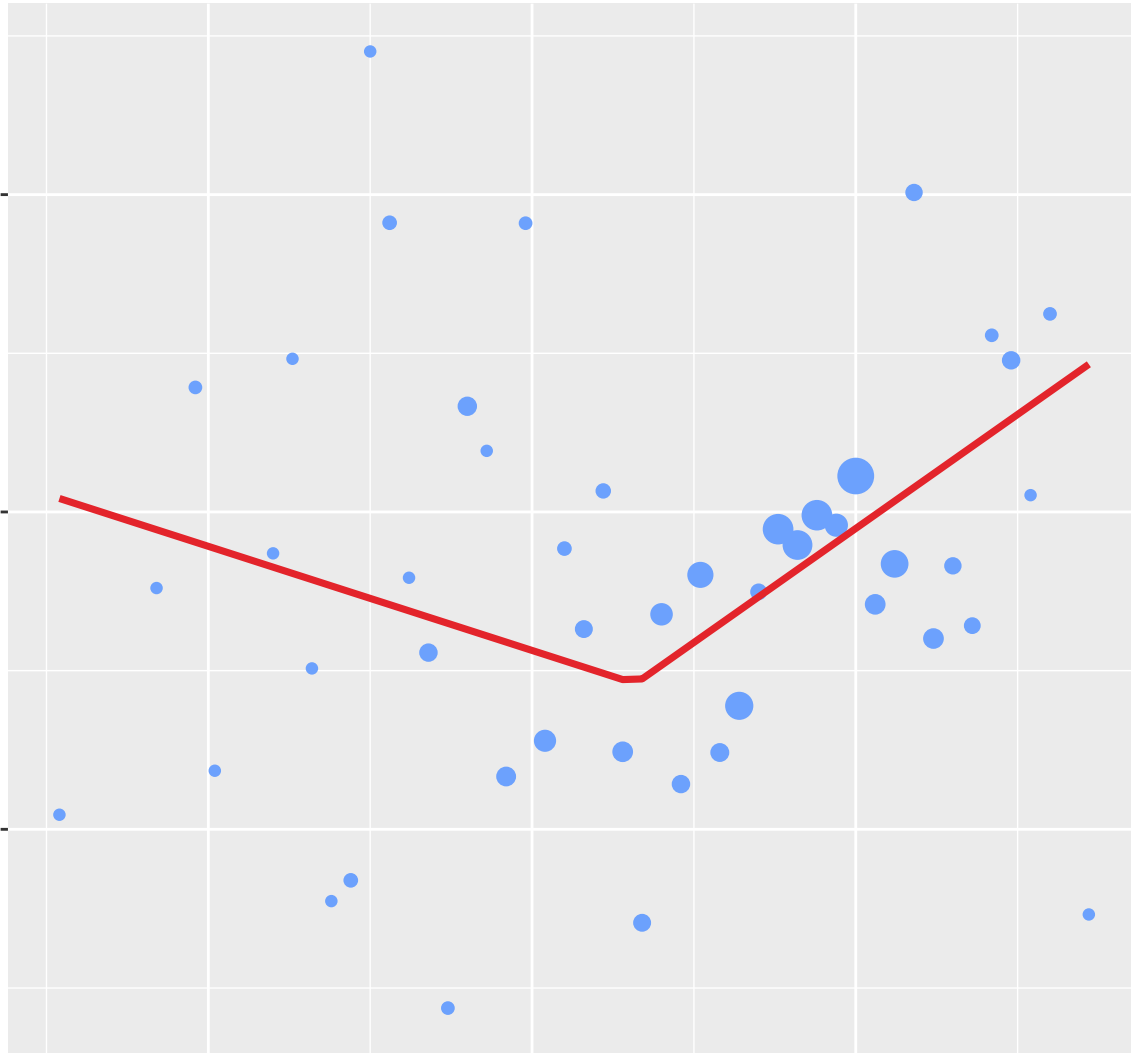

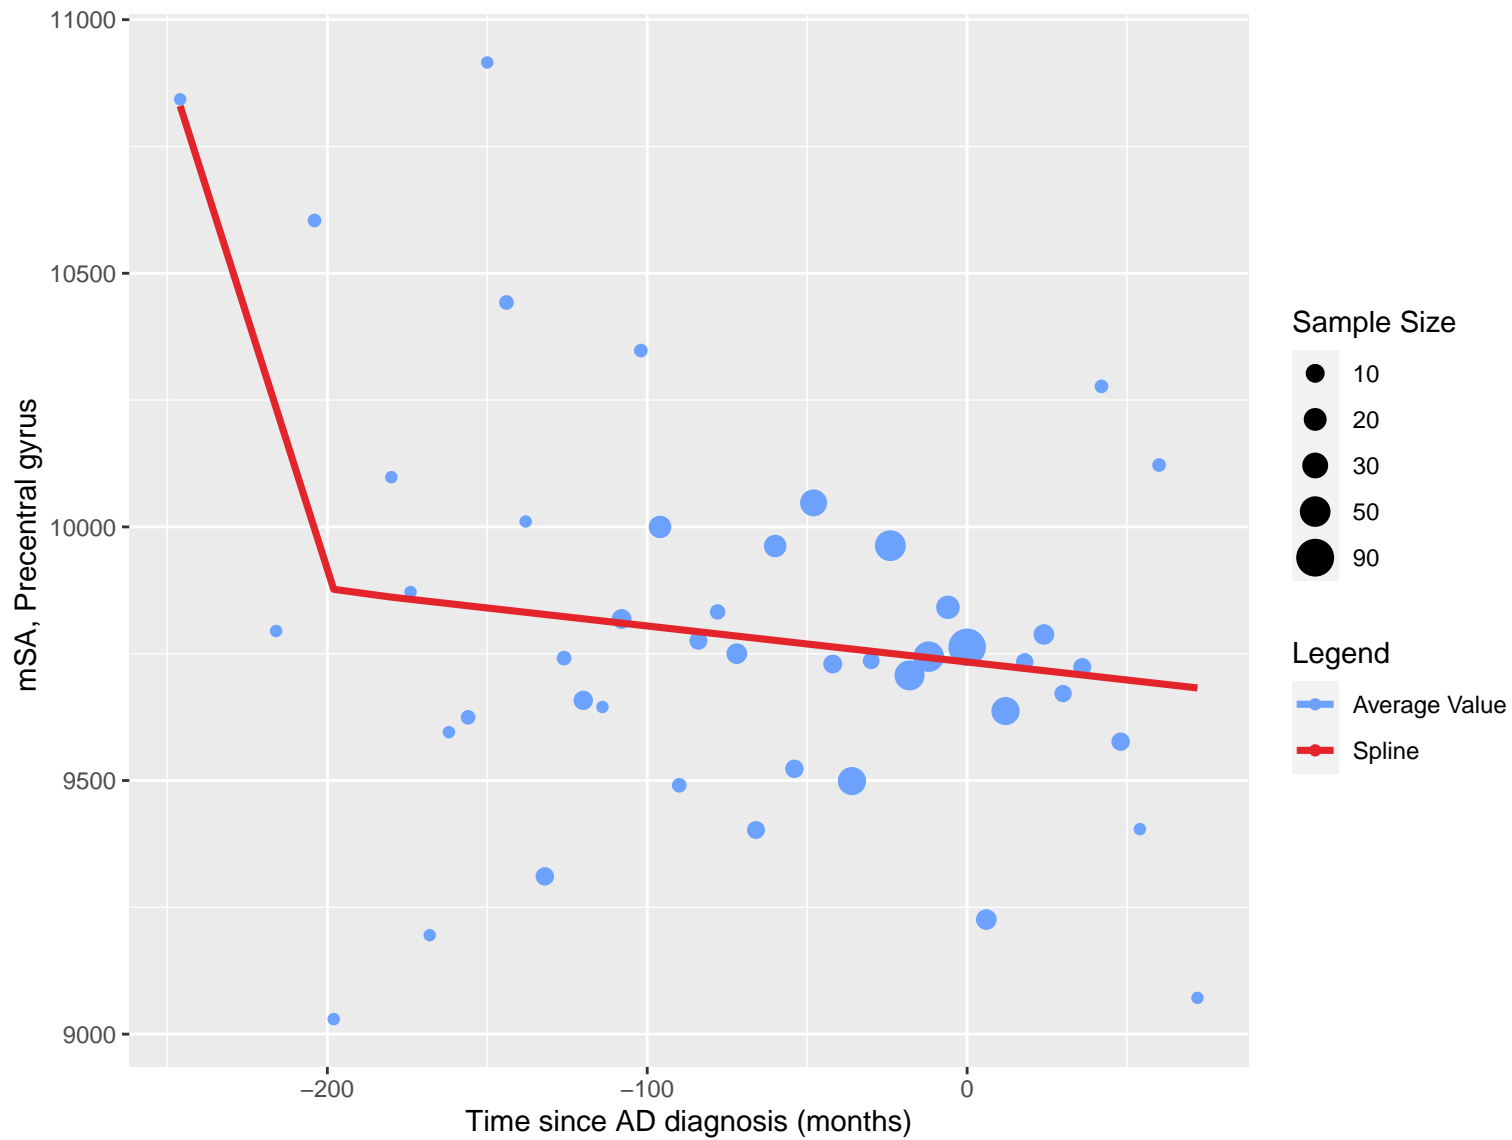

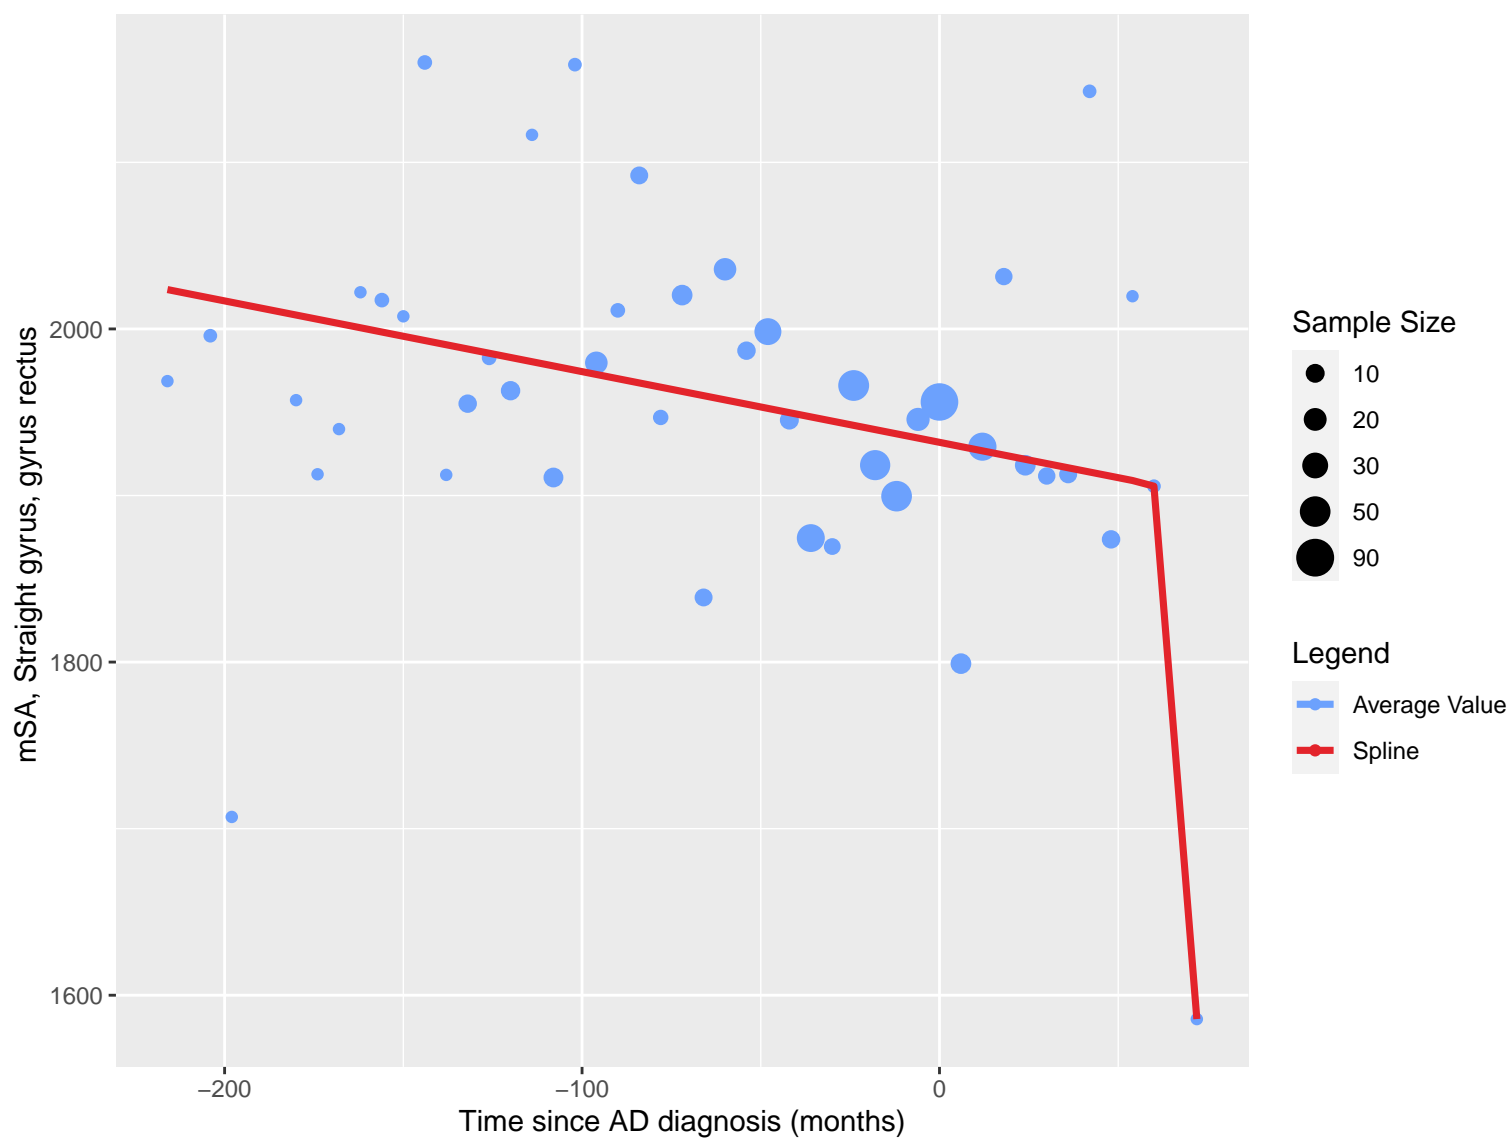

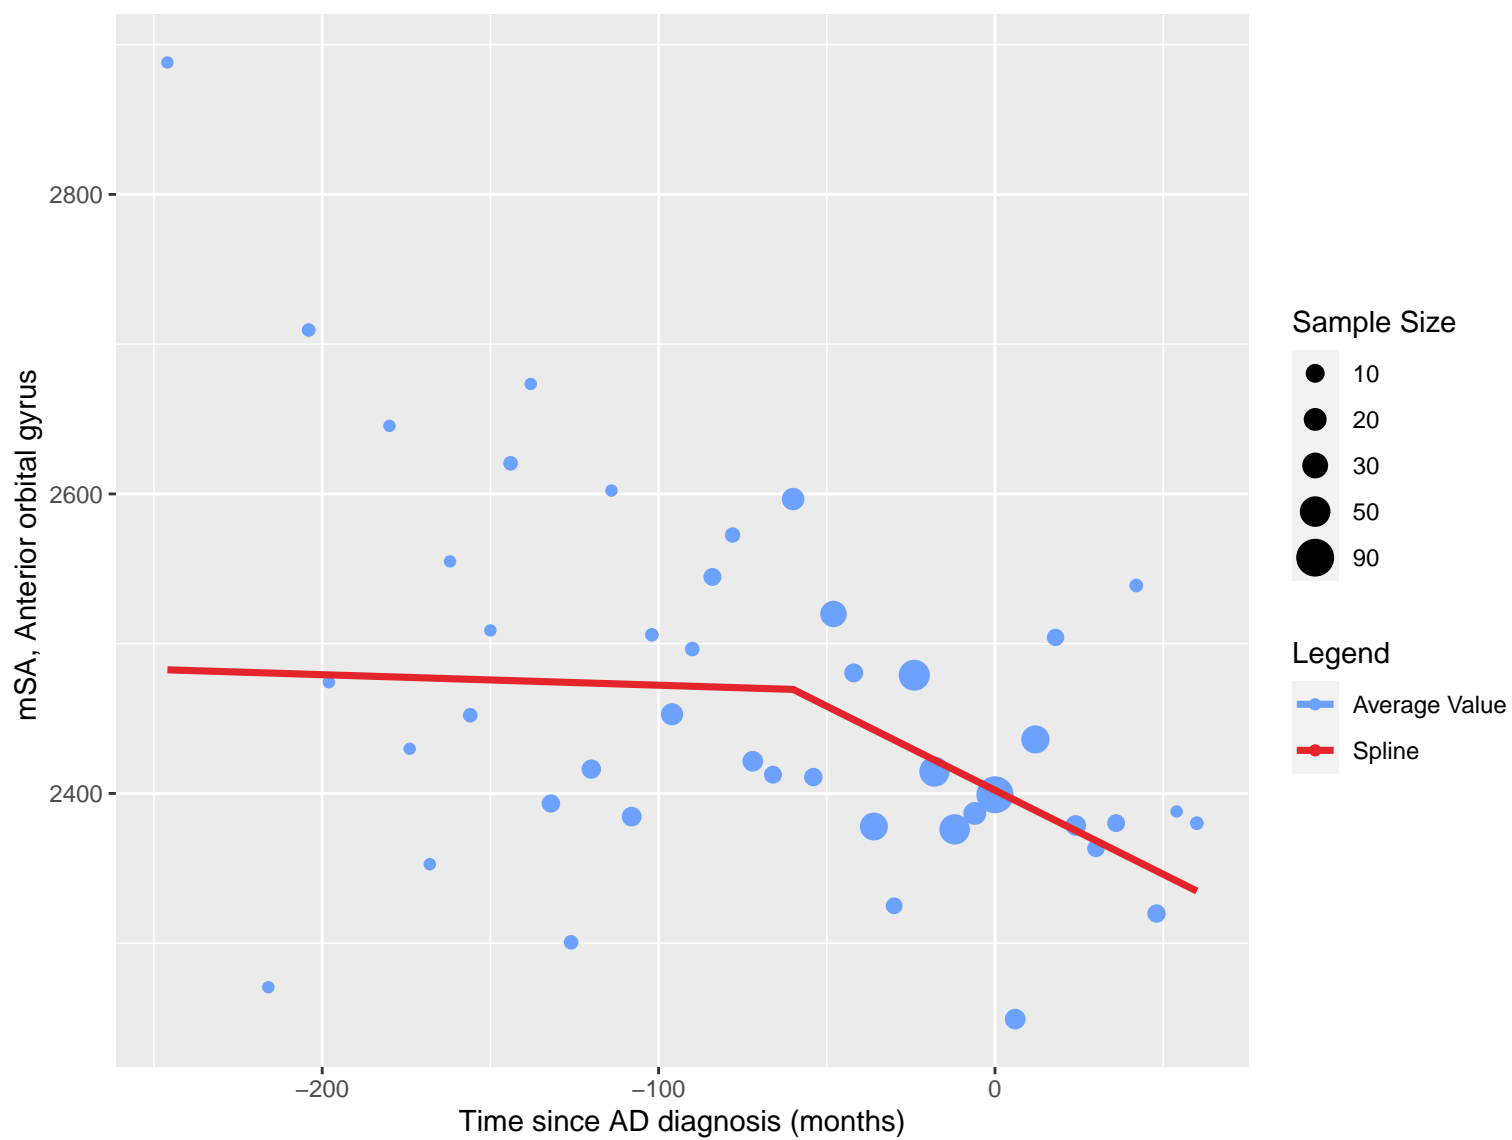



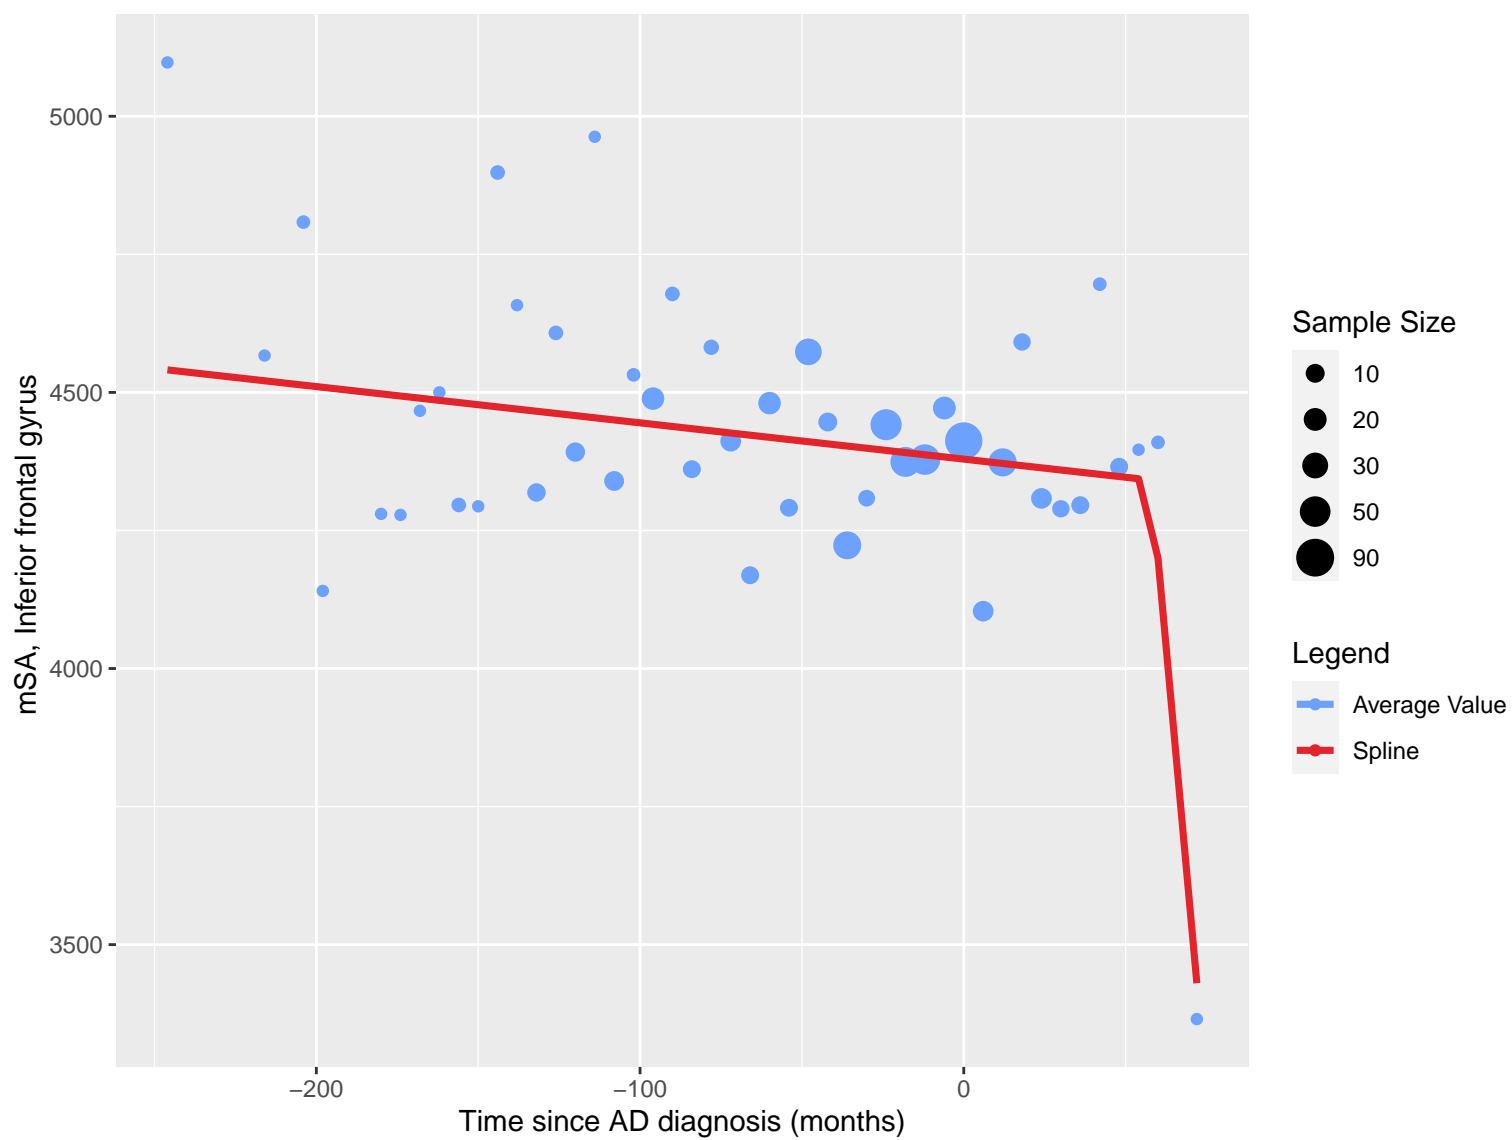

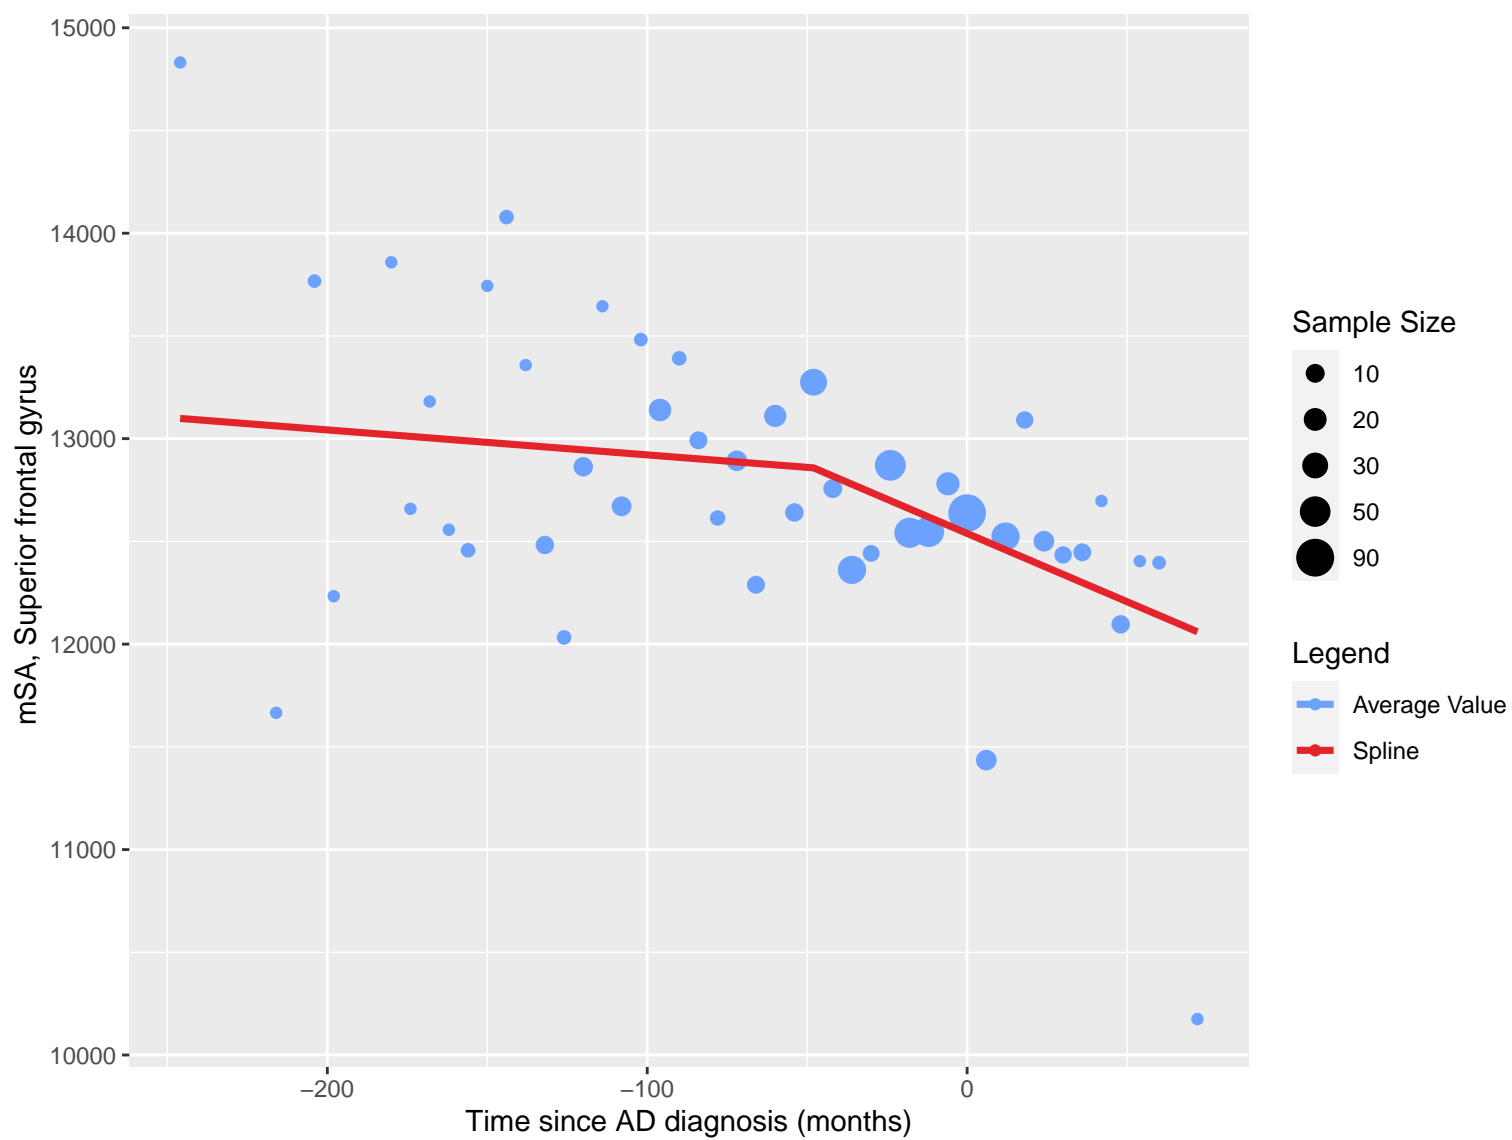

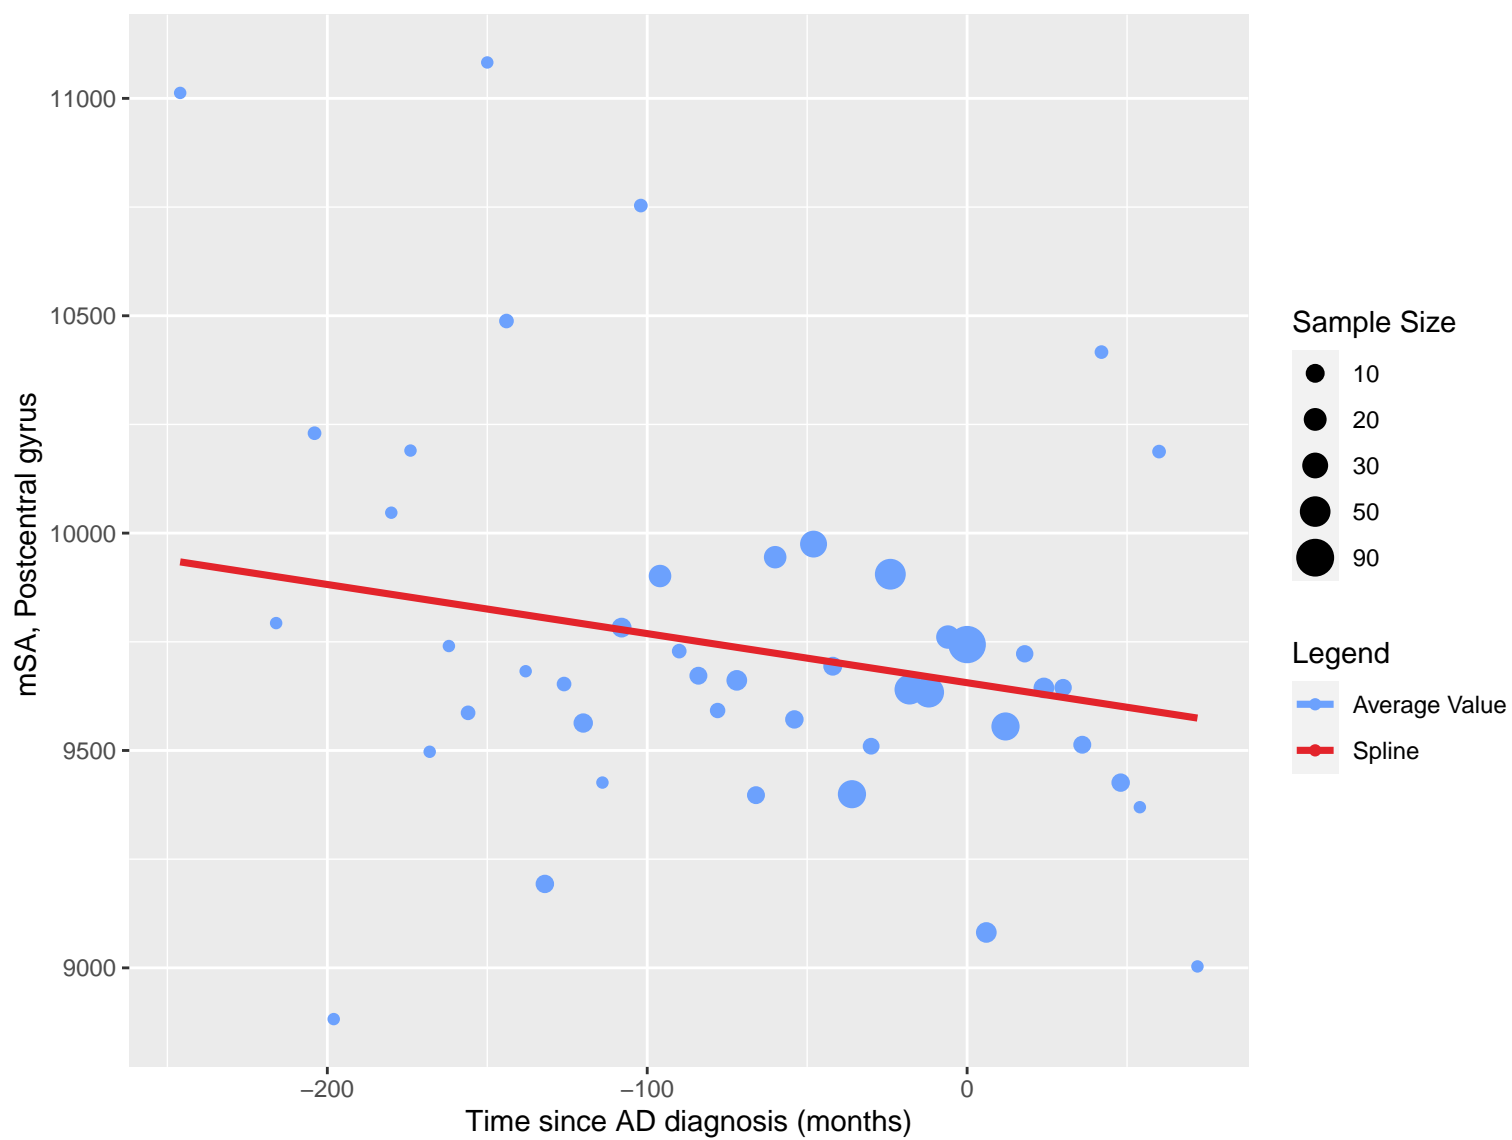

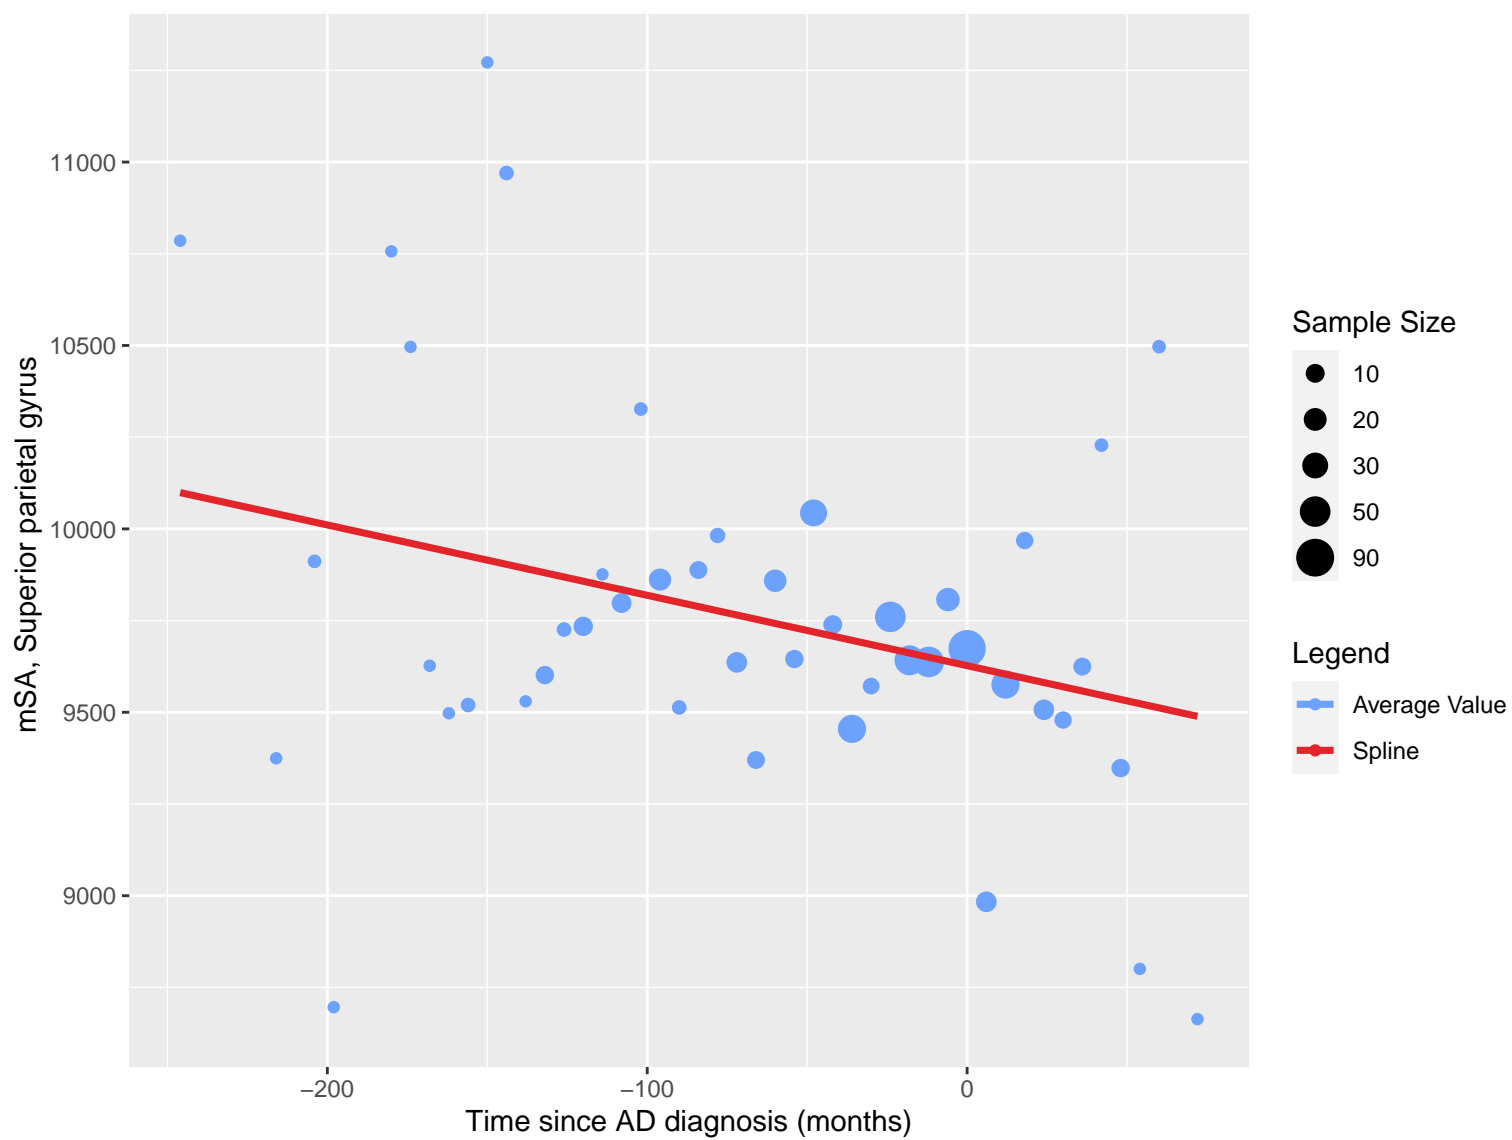

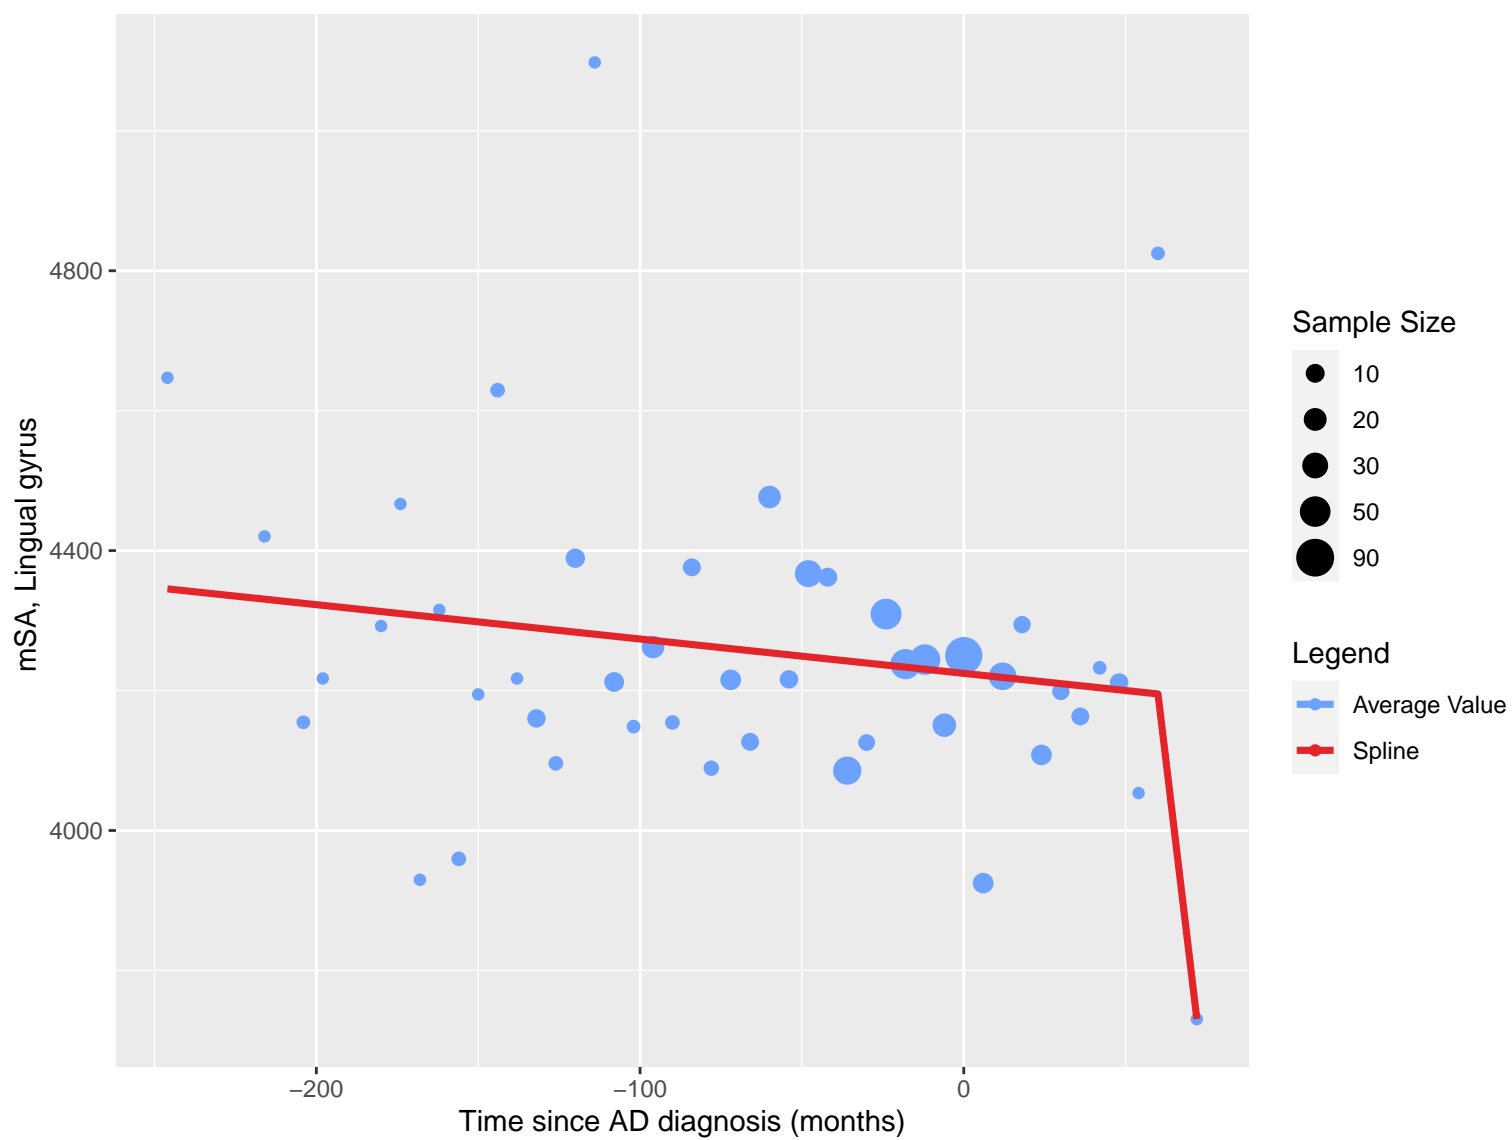

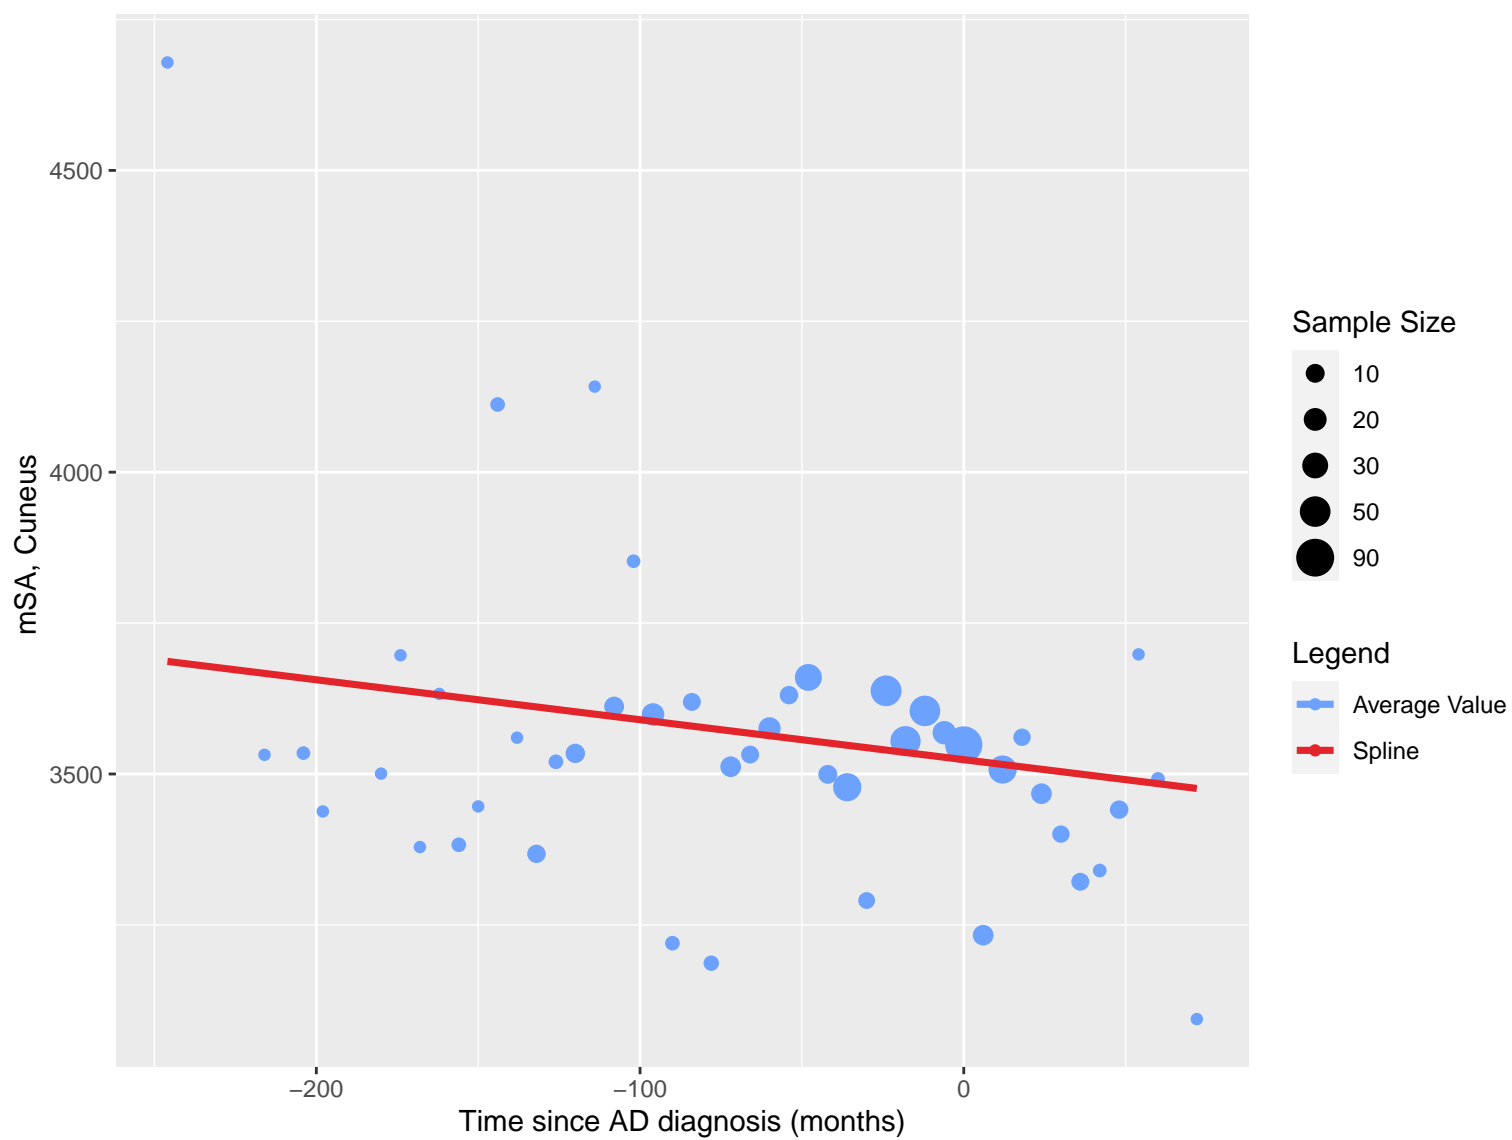

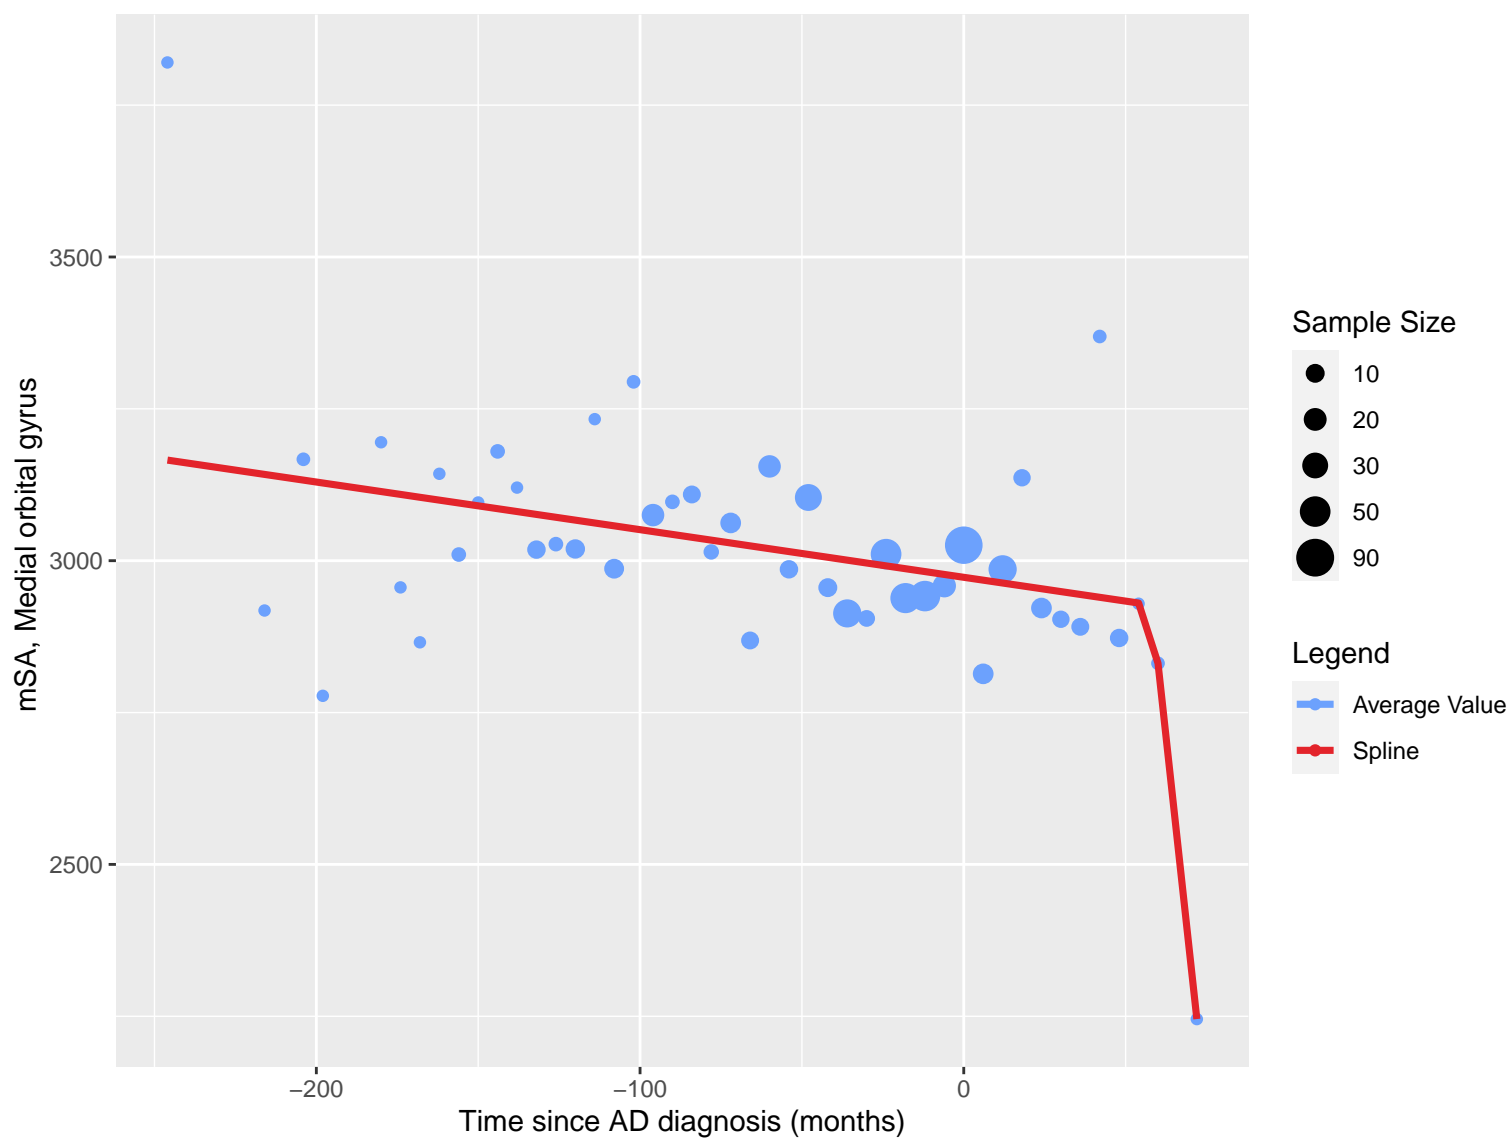

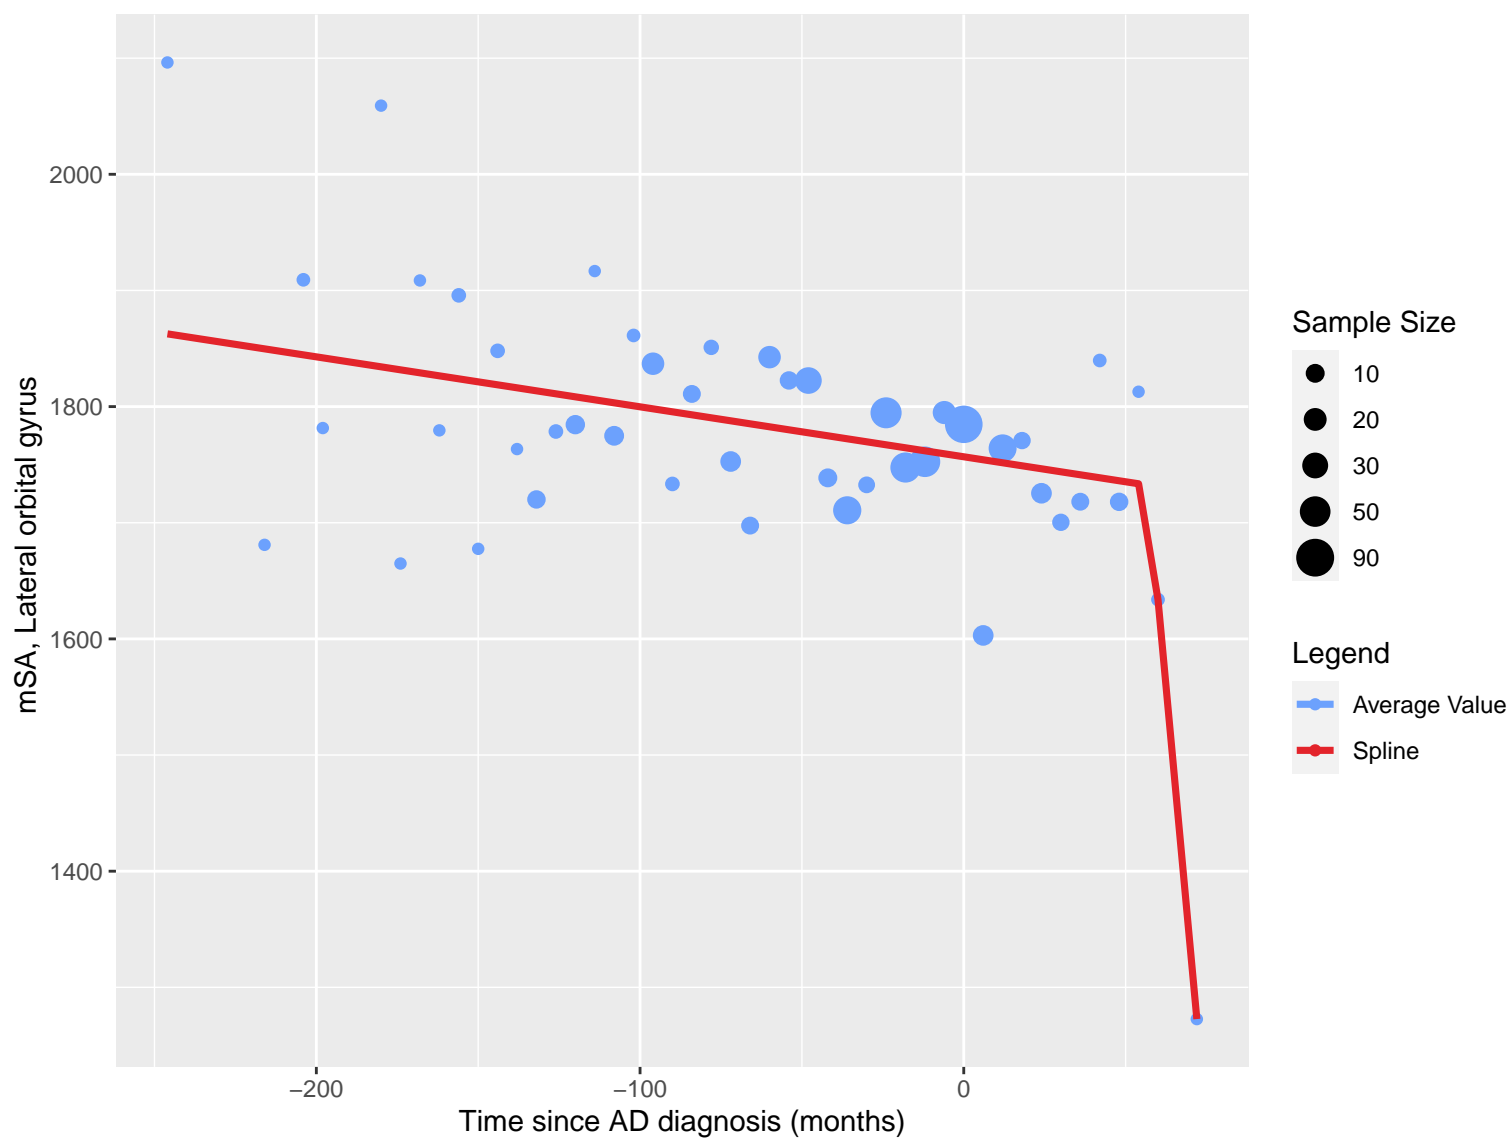



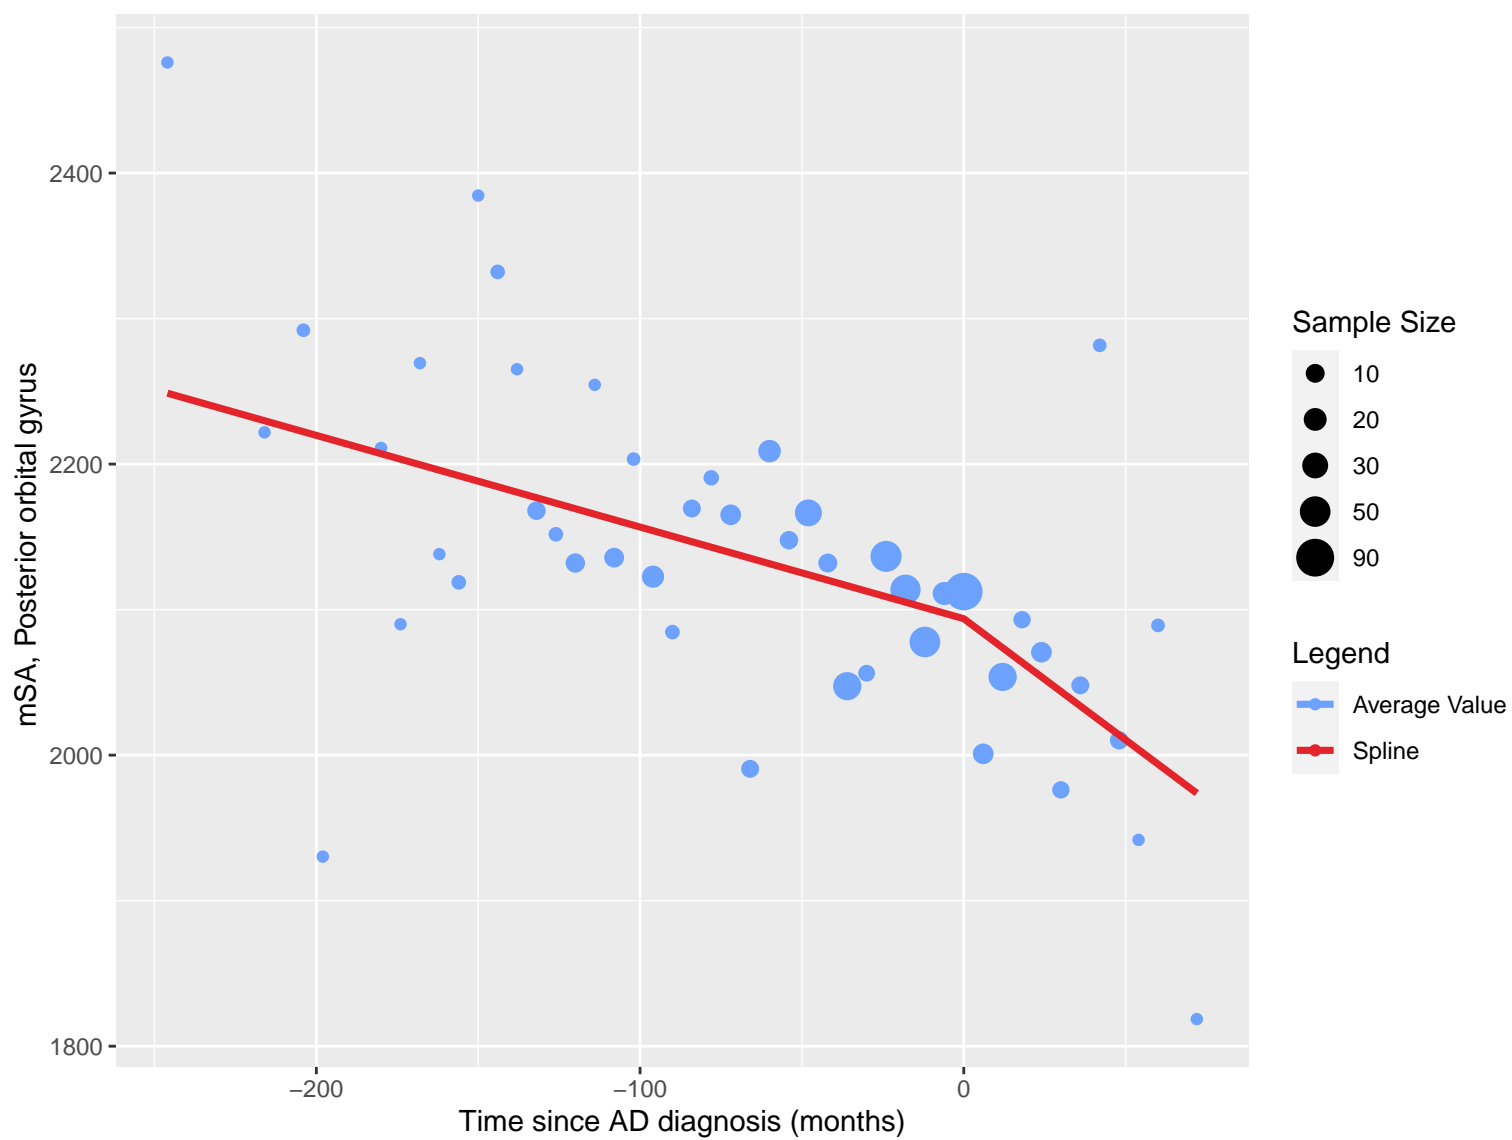

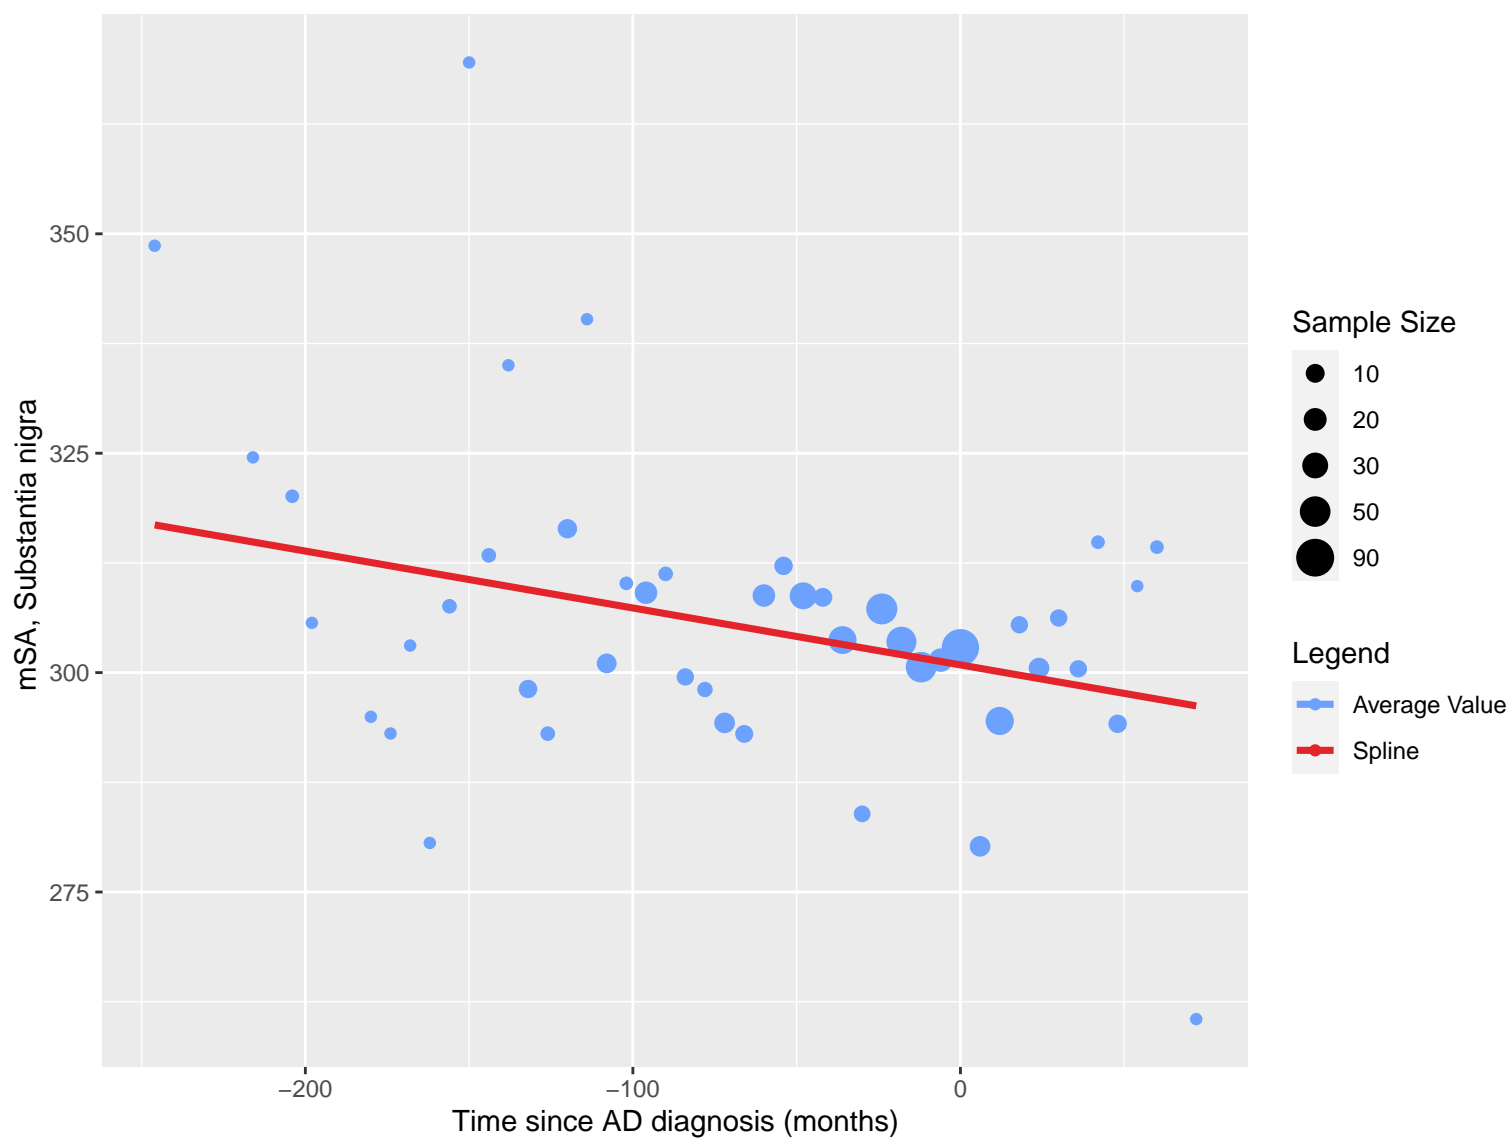

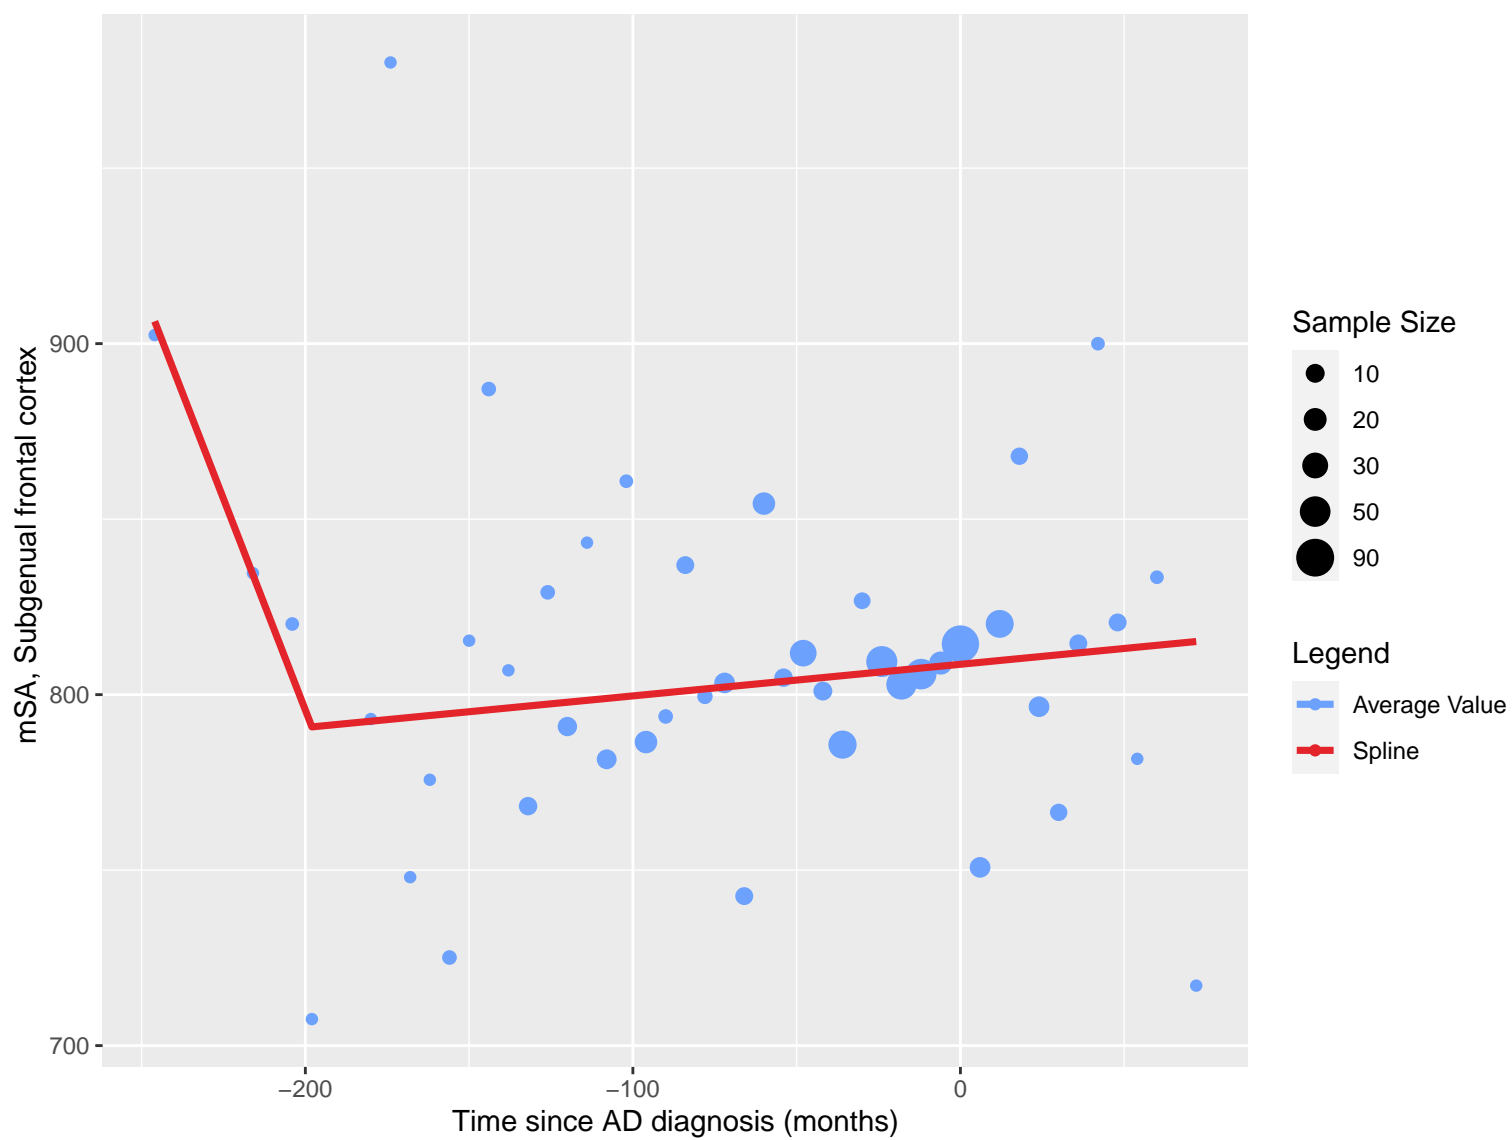

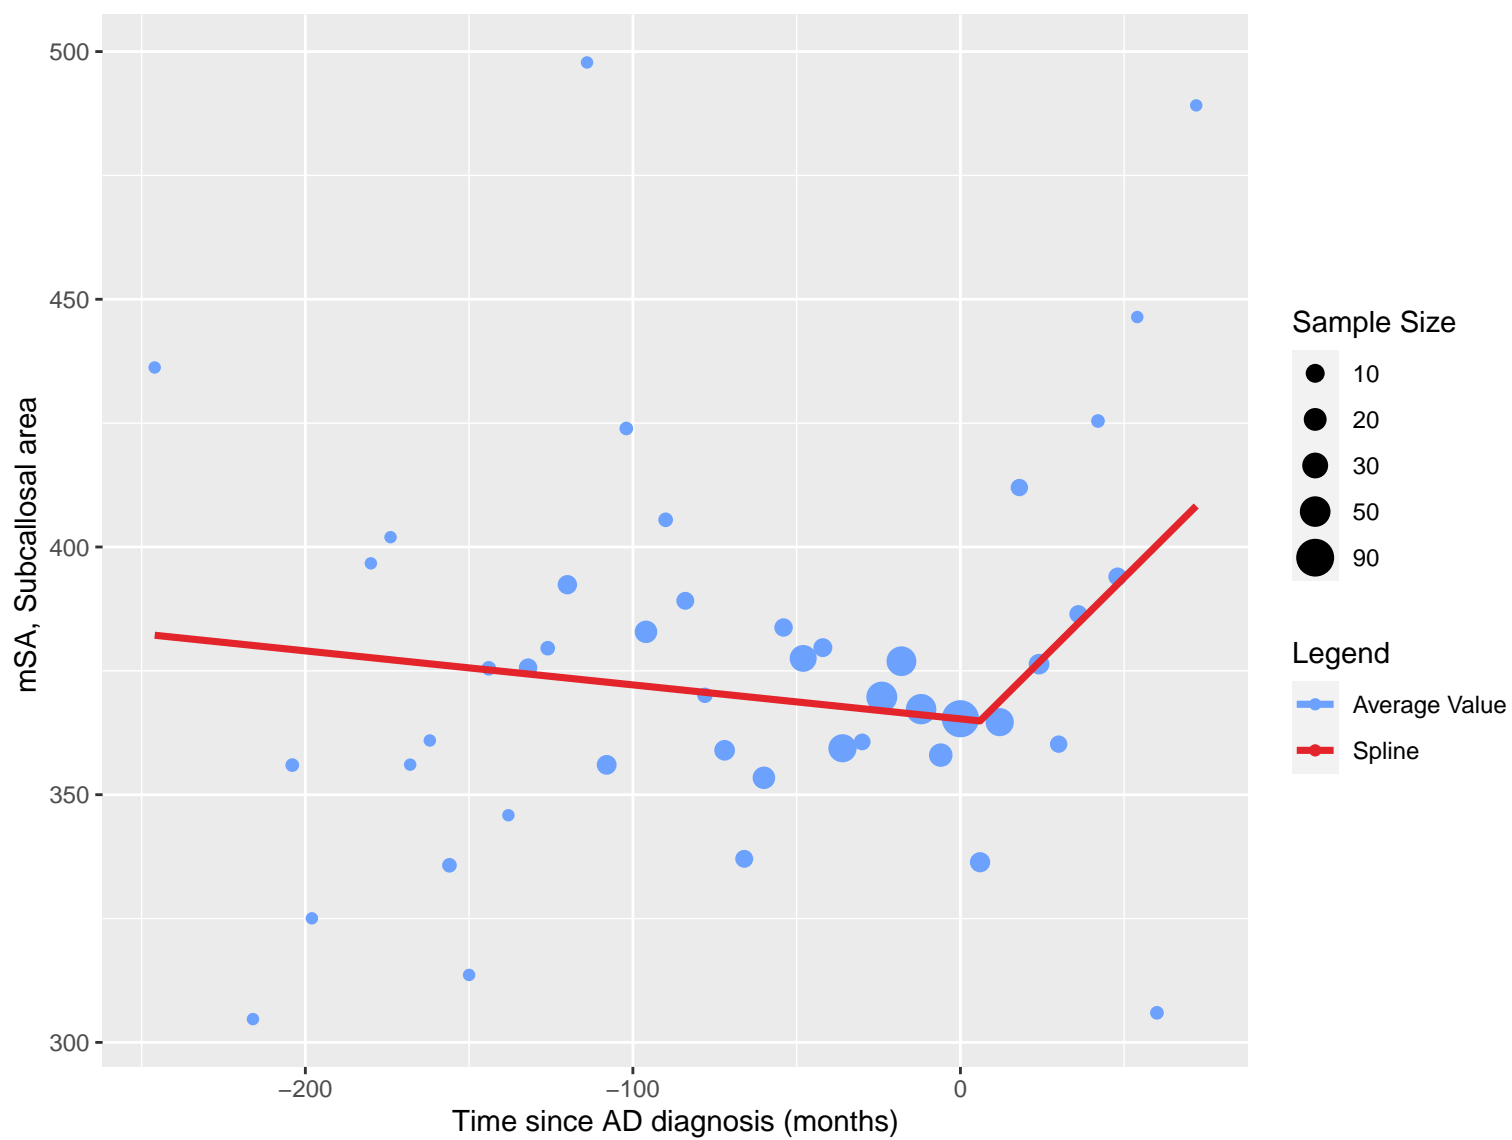

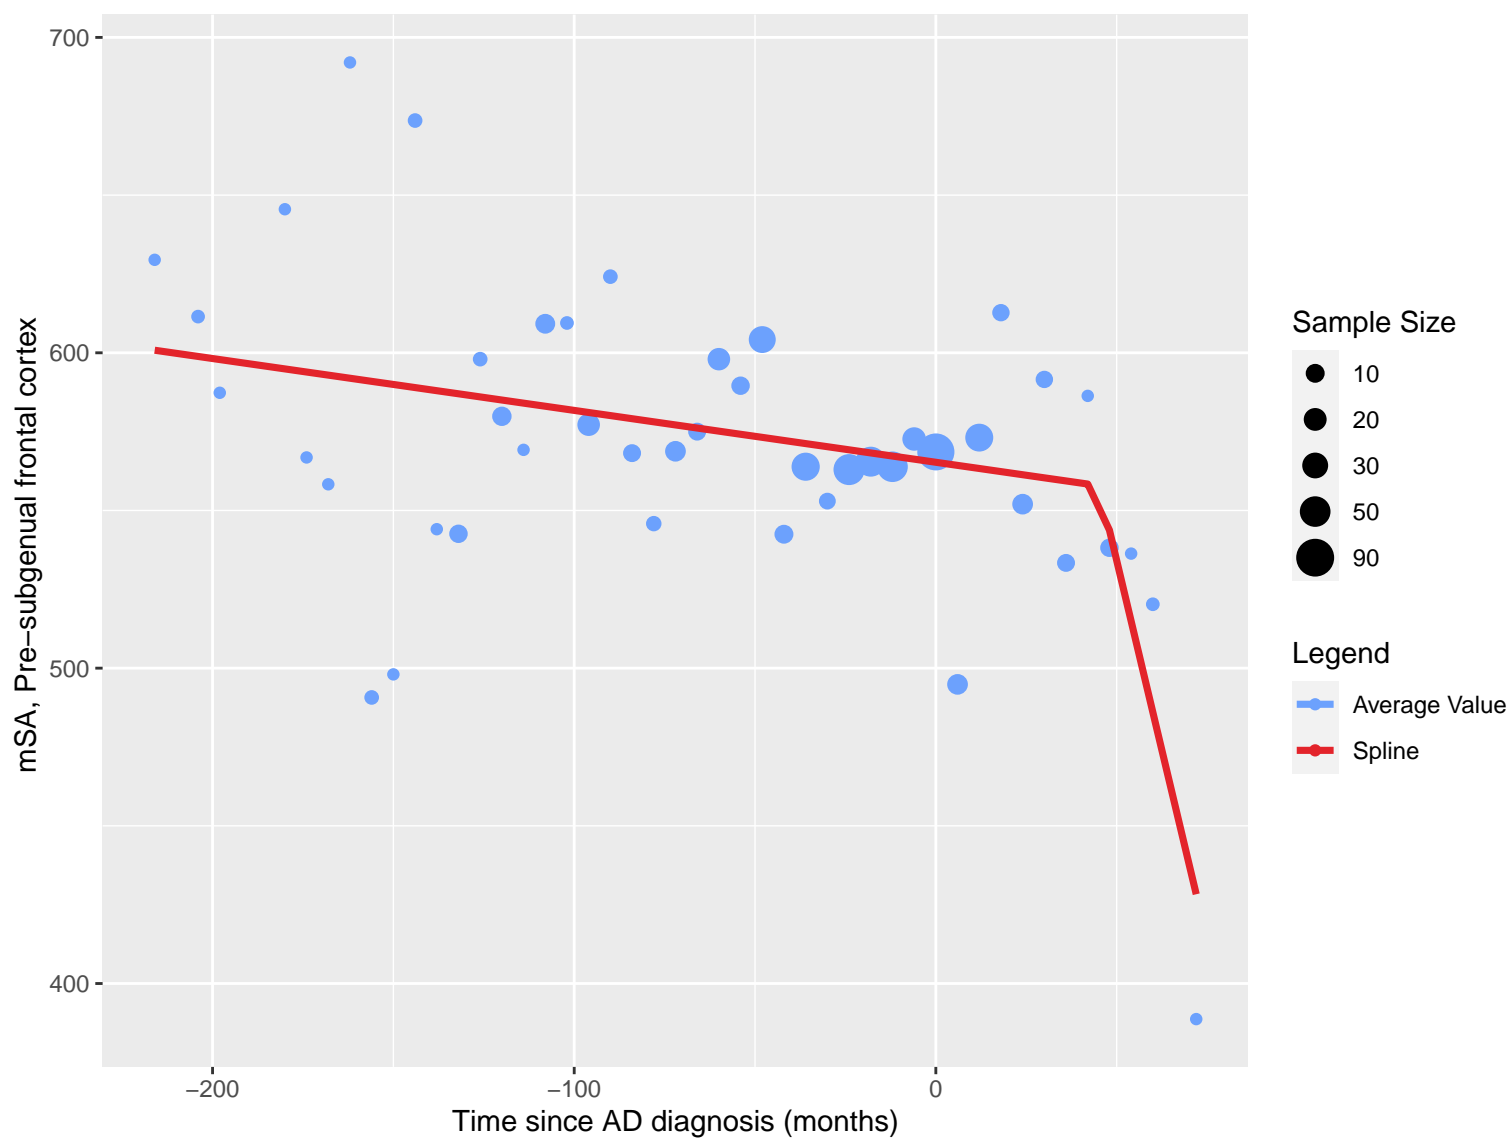

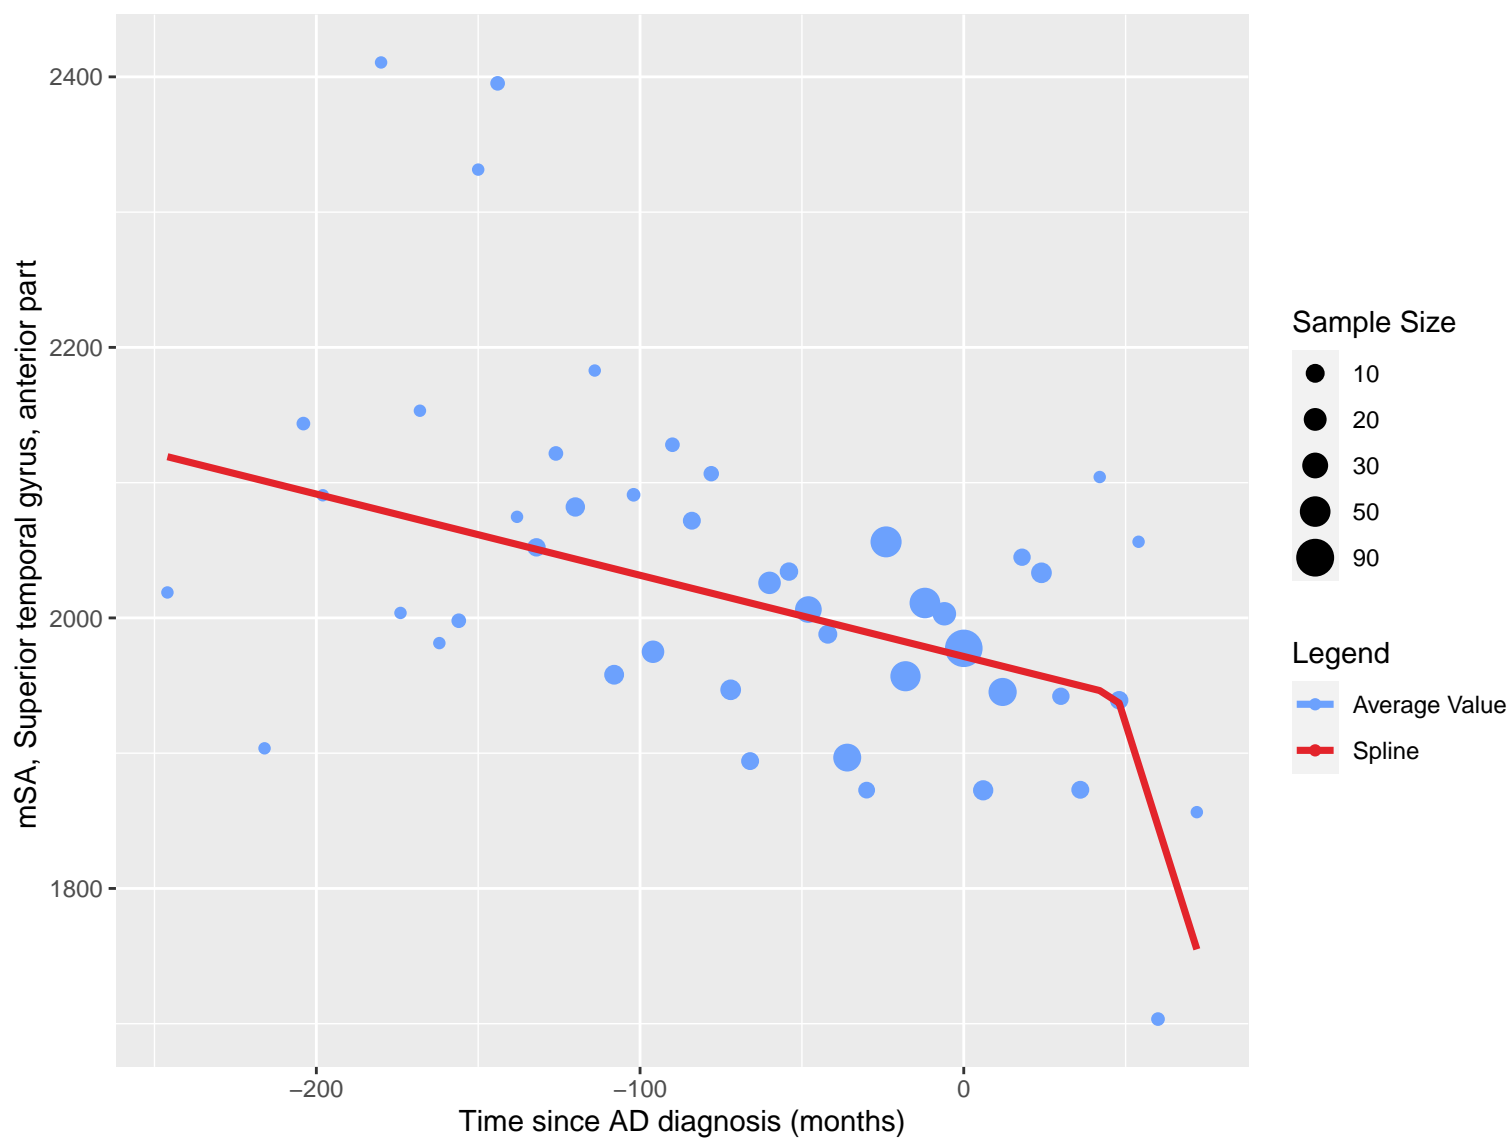

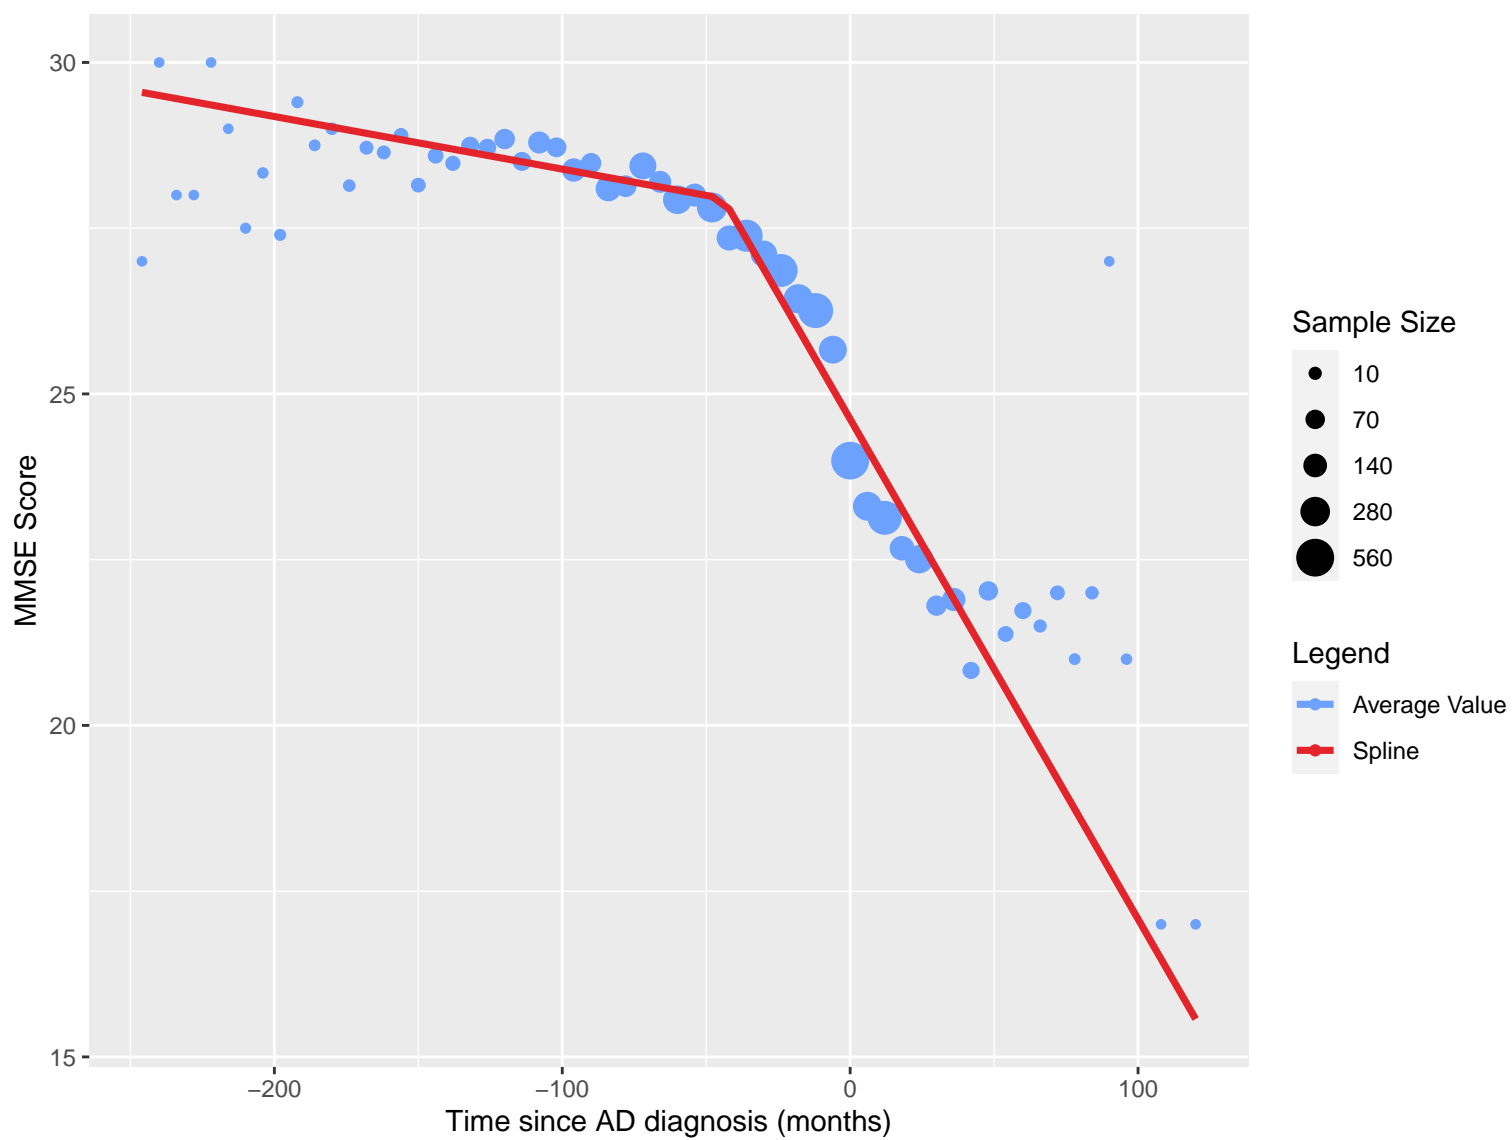

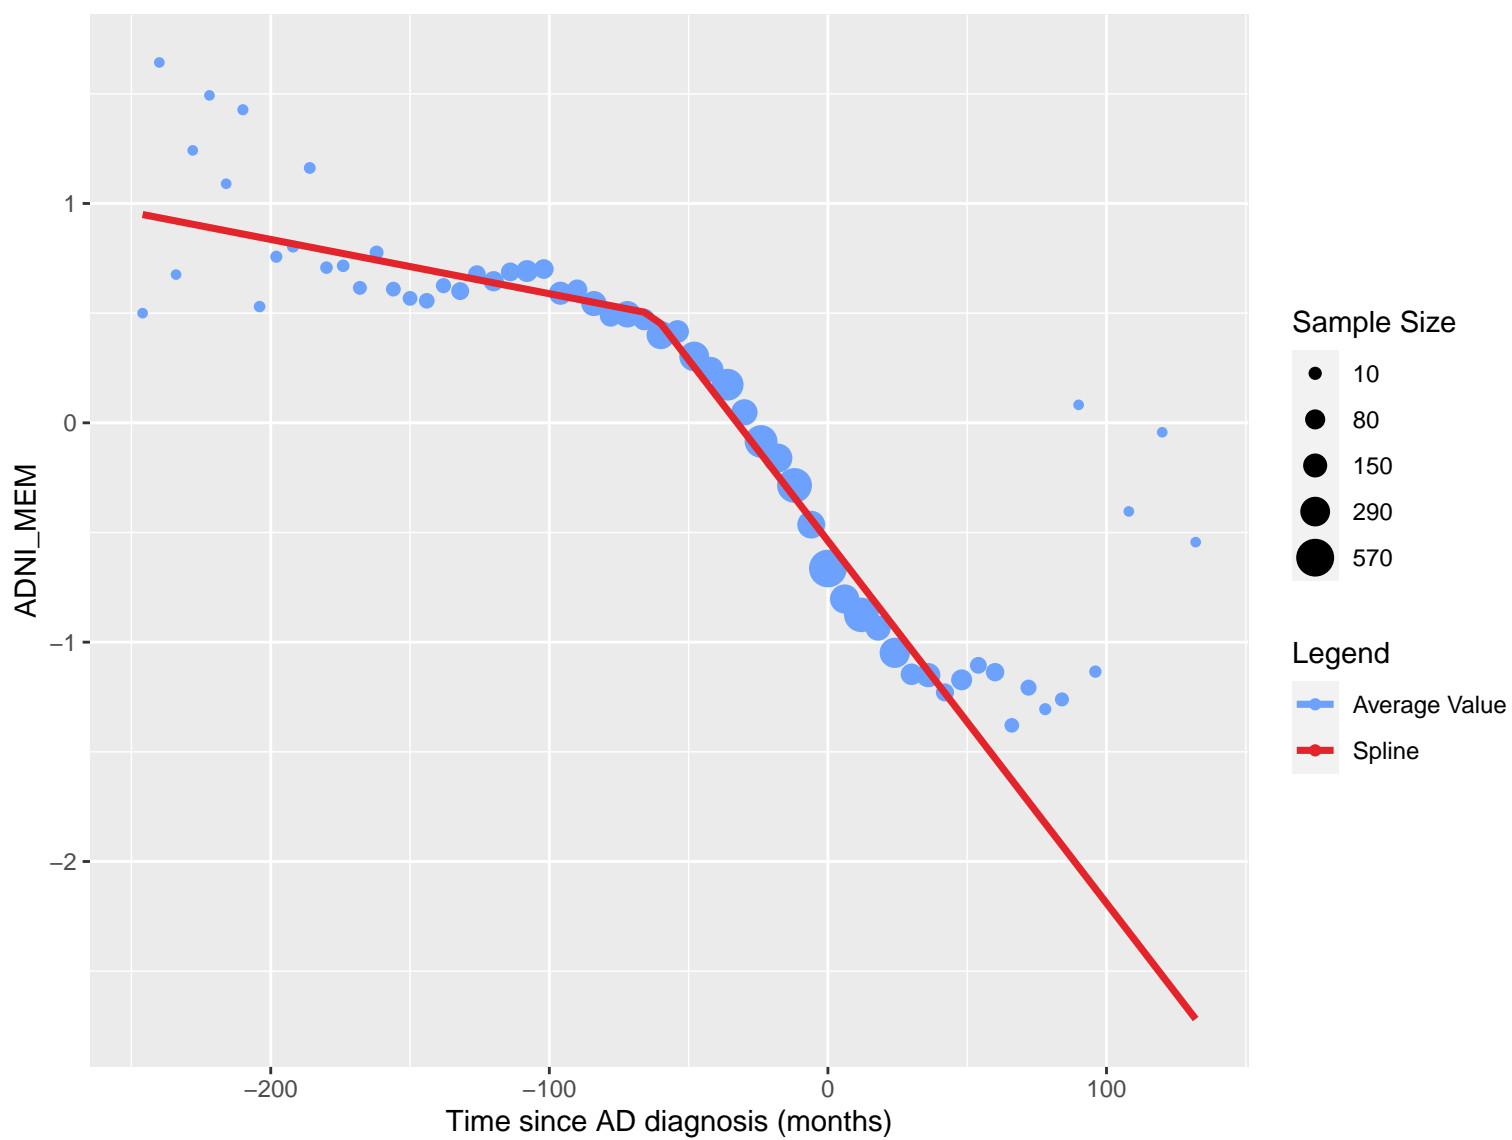



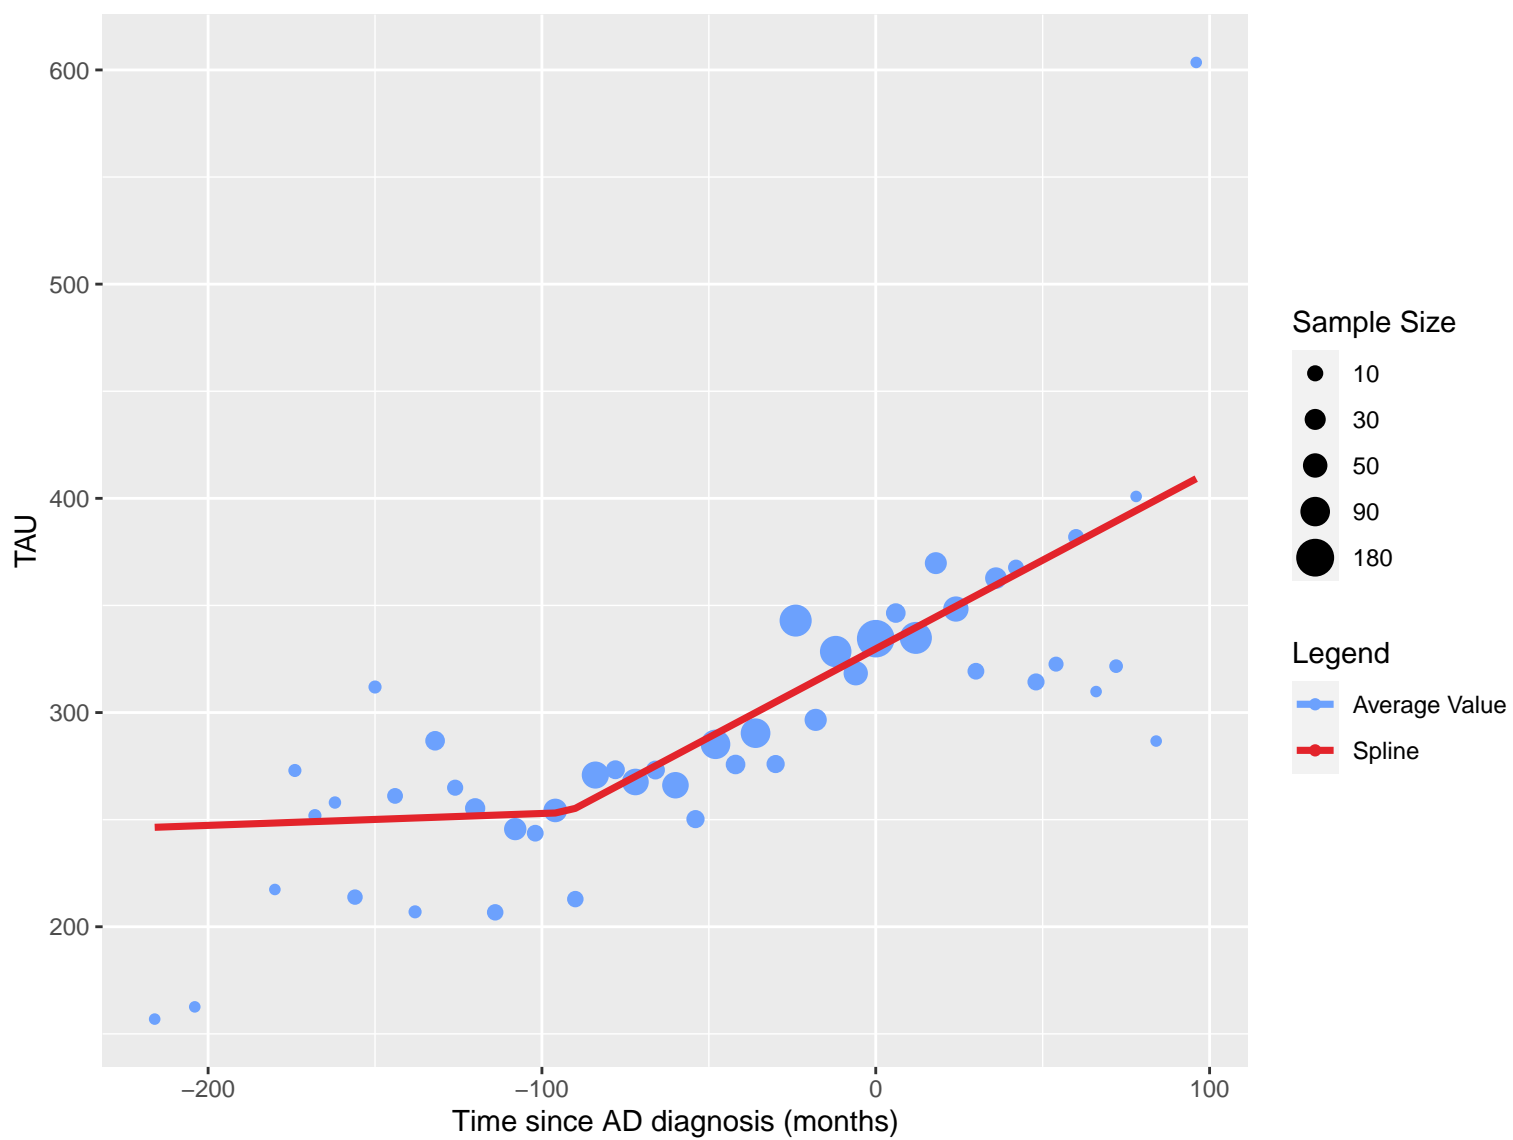

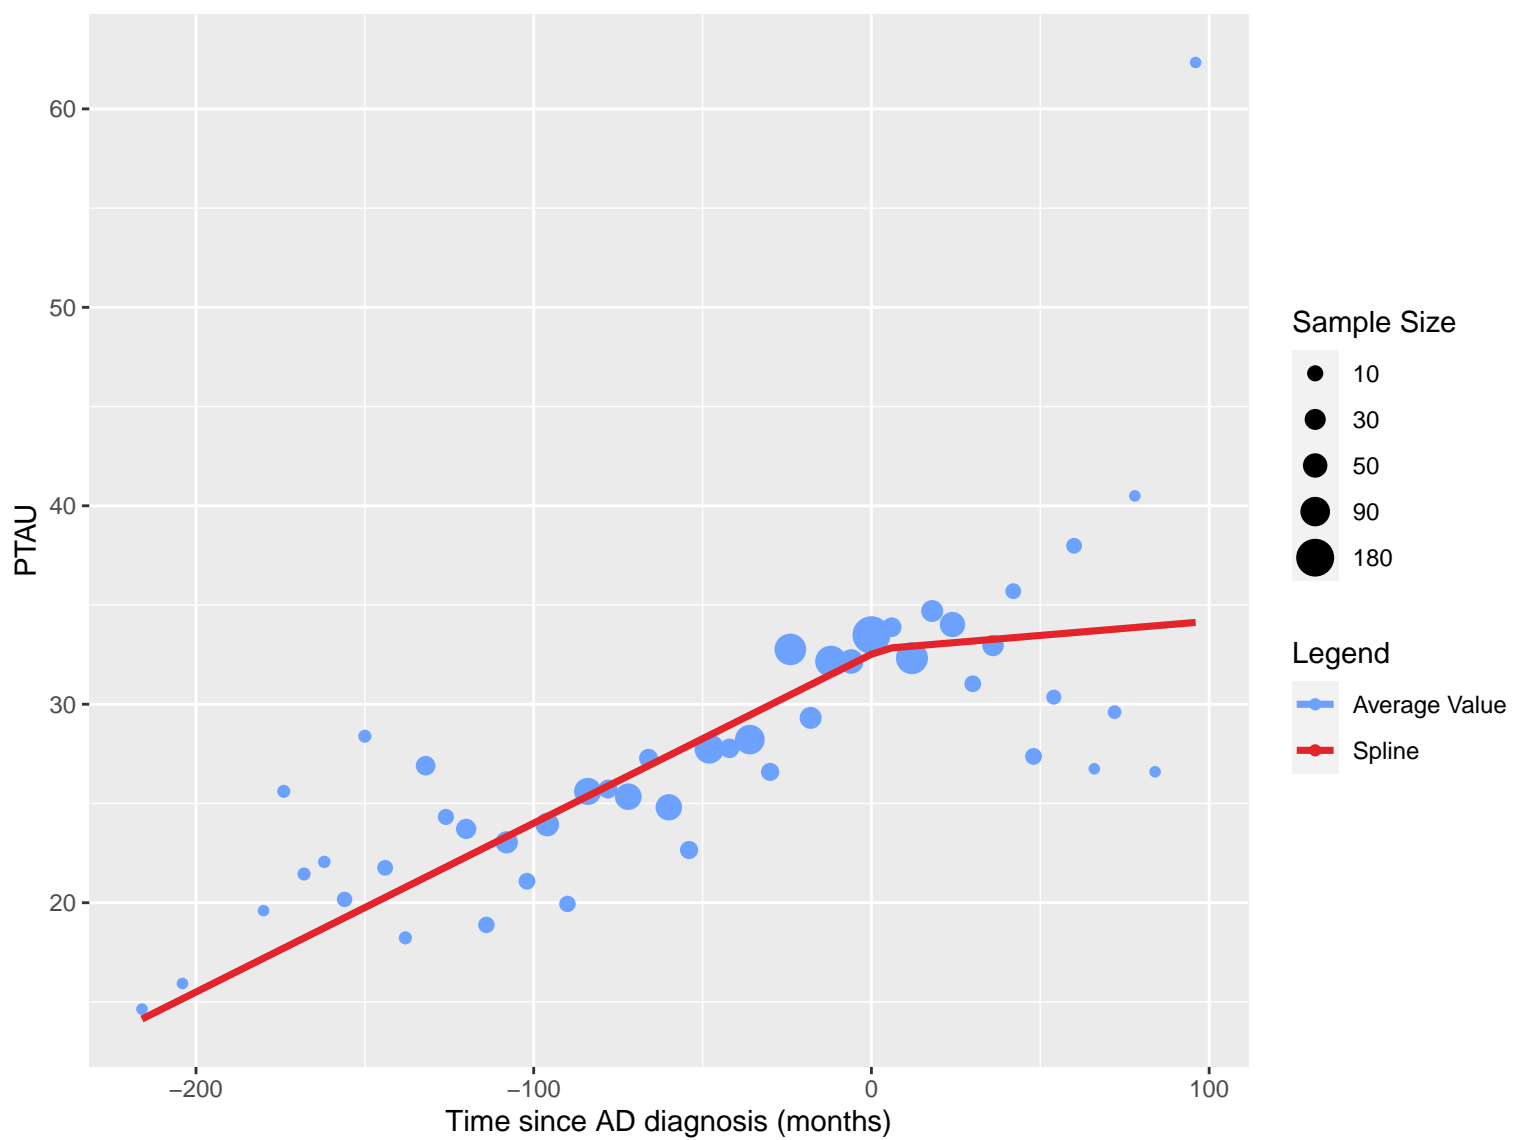

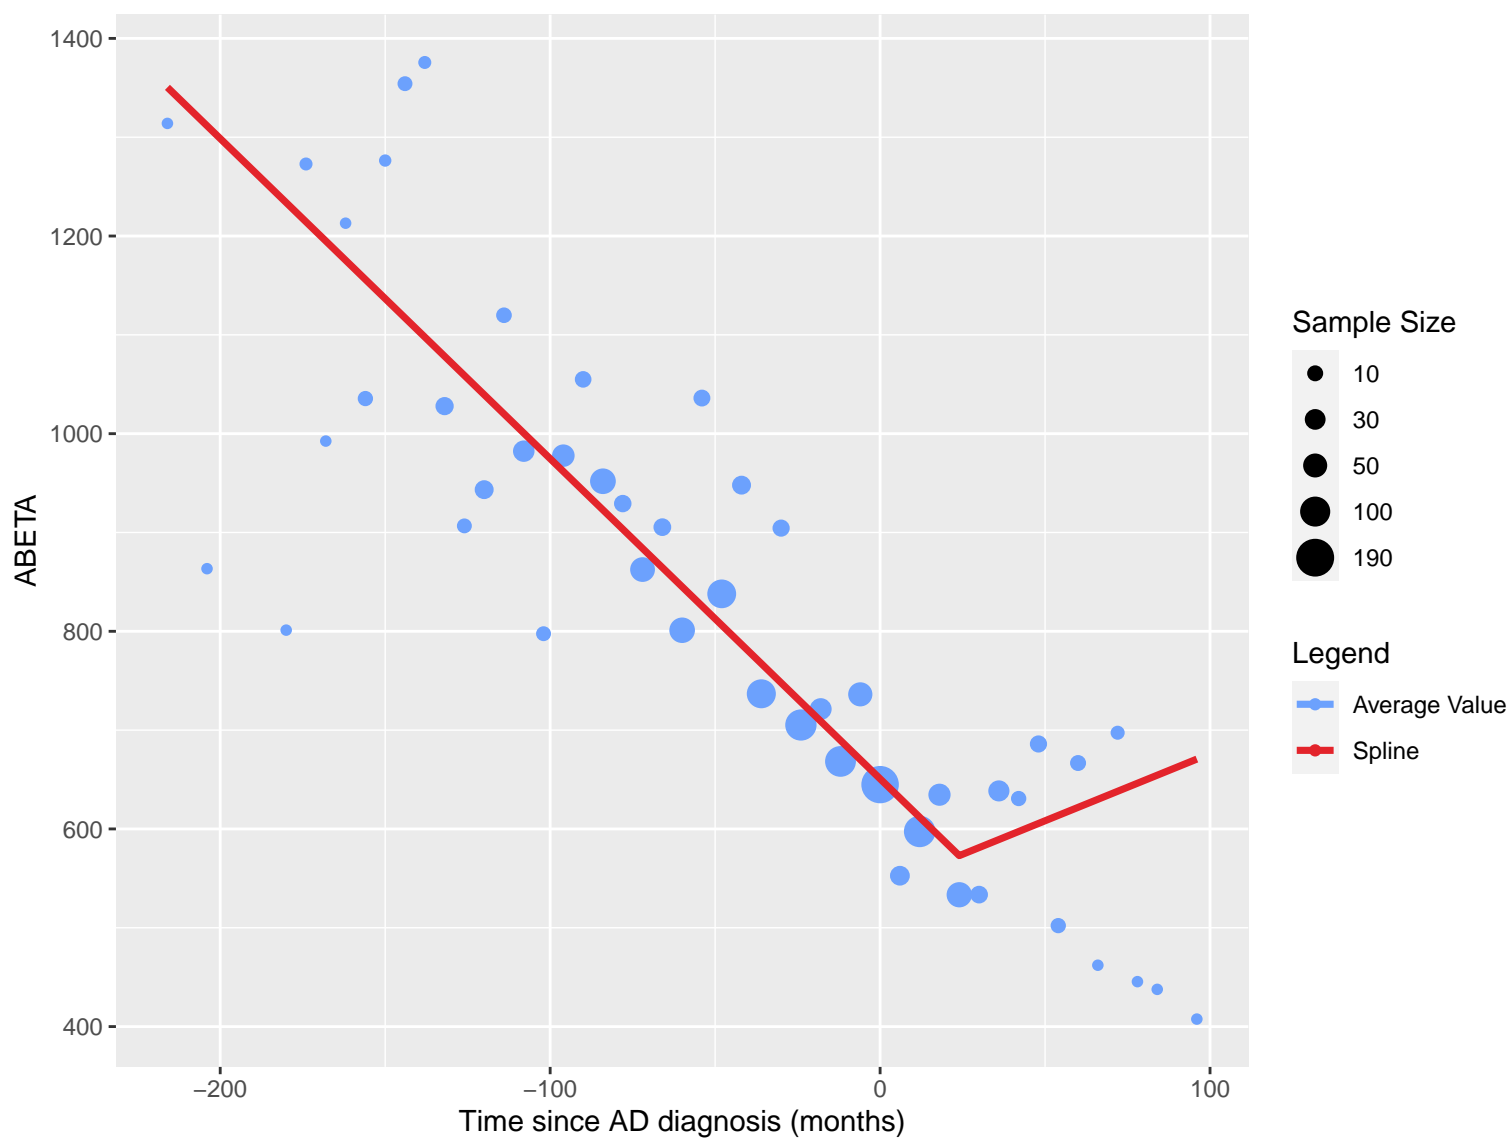

Supplement: s1 [file s1]
